# Supplementary material for: Integrated proteomic and metabolomic profiling of urine of renal anemia patients uncovers the molecular mechanisms of roxadustat
Source: Royal Society of Chemistry journal article supplement (doi:10.1039/d3mo00015j), 2023-03-20
Supplement: d3mo00015j1.xlsx [file d3mo00015j1.xlsx]

## Sheet: Protein_quant
Protein accession	Protein description	Gene name	Coverage [%]	Peptides	PSMs	Unique Peptides	MW [kDa]	Intensity F_U1	Intensity F_U2	Intensity F_U3	Intensity F_U4	Intensity F_U5	Intensity F_U6	Intensity P_U1	Intensity P_U2	Intensity P_U3	Intensity P_U4	Intensity P_U5	Intensity P_U6	F_U1	F_U2	F_U3	F_U4	F_U5	F_U6	P_U1	P_U2	P_U3	P_U4	P_U5	P_U6	P_U/F_U Ratio	P_U/F_U P value
P18669	Phosphoglycerate mutase 1 OS=Homo sapiens OX=9606 GN=PGAM1 PE=1 SV=2	PGAM1	30	6	20	6	28.8	7.10497e+06	1.40096e+06	2.57864e+06	829860	3.01992e+06	2.37515e+06	2.39977e+06	1.97564e+06	7.52141e+06	1.3003e+07	2.54345e+06	1.48553e+06	1.744	0.679	1.027	0.337	1.351	0.482	0.808	0.834	2.862	3.781	1.068	0.354	2.87	0.449961
O60437	Periplakin OS=Homo sapiens OX=9606 GN=PPL PE=1 SV=4	PPL	31	48	57	48	204.6	3.95016e+07	1.85724e+07	1.17375e+07	1.42098e+07	1.21257e+07	2.72372e+07	2.77972e+07	1.26903e+07	1.34277e+07	1.14383e+08	1.71056e+07	1.62206e+07	1.38	1.281	0.665	0.82	0.772	0.786	1.332	0.762	0.727	4.732	1.021	0.551	1.741	0.569902
O43242	26S proteasome non-ATPase regulatory subunit 3 OS=Homo sapiens OX=9606 GN=PSMD3 PE=1 SV=2	PSMD3	2	1	1	1	60.9	106661
Q05BJ3	Neurosecretory protein VGF OS=Homo sapiens OX=9606 GN=VGF PE=1 SV=1	VGF	13	4	5	4	39.5	5.66776e+07	3.8486e+07	7.35503e+07	8.49753e+07	3.7626e+07	4.51675e+07	6.65483e+07	5.84758e+07	6.60591e+07	8.05768e+07	4.02789e+07	3.29506e+07	0.944	1.266	1.988	2.339	1.142	0.622	1.521	1.676	1.706	1.59	1.147	0.534	1.056	0.931184
A6XMV8	Protease serine 2 preproprotein OS=Homo sapiens OX=9606 GN=PRSS2 PE=1 SV=1	PRSS2	38	9	100	4	26.7	3.95354e+07	1.75236e+07	2.39742e+07	6.82235e+06	2.30064e+07	4.31637e+08	7.20189e+07	1.84558e+07	1.55953e+07	3.1586e+07	2.62605e+07	2.85983e+08	0.452	0.396	0.445	0.129	0.48	4.079	1.13	0.363	0.277	0.428	0.514	3.179	1.535	0.442457
A0A3B3ITT5	60S ribosomal protein L29 OS=Homo sapiens OX=9606 GN=RPL29 PE=1 SV=1	RPL29	9	1	1	1	18.5	4.00417e+06									587924
G3V2W1	Protein Z-dependent protease inhibitor OS=Homo sapiens OX=9606 GN=SERPINA10 PE=1 SV=1	SERPINA10	19	8	45	8	55.1	4.32617e+06	1.25856e+06	2.57383e+06	1.01496e+06	2.09878e+07	4.90652e+06	2.315e+06	1.68432e+06	3.06895e+06	1.72819e+06	1.07664e+07	5.32561e+06	0.819	0.47	0.791	0.318	7.242	0.768	0.601	0.548	0.901	0.388	3.485	0.98	1.003	0.754337
K7EQ86	KIAA0100, isoform CRA_a OS=Homo sapiens OX=9606 GN=KIAA0100 PE=1 SV=1	KIAA0100	0	1	3	1	237.1						2.0002e+06						2.03728e+06
A0A087WY31	YTH domain-containing family protein 3 OS=Homo sapiens OX=9606 GN=YTHDF3 PE=1 SV=1	YTHDF3	2	1	1	1	64.5	1.4809e+06				814715	576708	574537	541739			866934
B4E1Z4	C3/C5 convertase OS=Homo sapiens OX=9606 PE=1 SV=1	--	45	70	1313	11	140.9	2.7723e+09	1.23388e+09	1.74098e+09	8.34253e+08	3.61654e+09	6.0824e+09	2.0829e+09	1.25674e+09	1.25801e+09	1.14868e+09	2.78785e+09	4.08369e+09	1.089	0.957	1.11	0.542	2.589	1.974	1.122	0.849	0.766	0.534	1.872	1.559	0.851	0.0498101
F5GWI4	Adenosine deaminase OS=Homo sapiens OX=9606 GN=ADA PE=1 SV=1	ADA	2	1	1	1	38.3	853709
V9GZ78	C-1-tetrahydrofolate synthase, cytoplasmic OS=Homo sapiens OX=9606 GN=MTHFD1 PE=1 SV=2	MTHFD1	4	3	3	3	92.5	3.82787e+06												0.946
G3XAN8	Mitochondrial import inner membrane translocase subunit OS=Homo sapiens OX=9606 GN=TIMM8B PE=1 SV=1	TIMM8B	11	1	1	1	11.1
Q96L35	Receptor protein-tyrosine kinase OS=Homo sapiens OX=9606 GN=EPHB4 PE=1 SV=1	EPHB4	6	4	15	4	102.5	1.68825e+06	527383	1.59252e+06	2.35987e+06	652539	3.63364e+06	714744	602817	516096	2730369	582318	4.05754e+06	0.975	0.601	1.492	2.252	0.687	1.734	0.566	0.599	0.462	1.868	0.575	2.277	0.811	0.201149
A2AB88	Prefoldin subunit 6 OS=Homo sapiens OX=9606 GN=PFDN6 PE=1 SV=1	PFDN6	8	1	1	1	11.6
I3L2L5	Mapk-regulated corepressor-interacting protein 1 OS=Homo sapiens OX=9606 GN=MCRIP1 PE=1 SV=1	MCRIP1	20	1	2	1	10.5	191435	590440						273539
D6RFI0	Sideroflexin-1 (Fragment) OS=Homo sapiens OX=9606 GN=SFXN1 PE=1 SV=8	SFXN1	7	1	1	1	21.4	1.11353e+06			130305						93579.7
A0A2Q2TTZ9	Immunoglobulin kappa variable 1-33 OS=Homo sapiens OX=9606 GN=IGKV1D-33 PE=1 SV=1	IGKV1D-33	43	12	382	5	11.8	8.34371e+07	3.53877e+07	2.84839e+07	4.55811e+07	5.58124e+07	1.3091e+08	7.42585e+07	4.00927e+07	3.58584e+07	6.15951e+07	6.82211e+07	8.99469e+07	1.263	1.058	0.7	1.141	1.54	1.638	1.542	1.044	0.842	1.105	1.766	1.324	1.056	0.531382
A0A4W9A917	Immunoglobulin heavy constant gamma 3 (Fragment) OS=Homo sapiens OX=9606 GN=IGHG3 PE=1 SV=1	IGHG3	69	54	4823	9	41.3	9.39579e+08	5.99304e+08	3.7188e+08	5.73671e+08	9.5911e+08	1.4738e+09	1.64013e+09	5.67533e+08	4.87365e+08	7.61231e+08	1.0736e+09	1.47279e+09	0.977	1.23	0.627	0.985	1.817	1.266	2.338	1.015	0.785	0.937	1.908	1.488	1.274	0.294476
Q5T4U5	Medium-chain specific acyl-CoA dehydrogenase, mitochondrial OS=Homo sapiens OX=9606 GN=ACADM PE=1 SV=1	ACADM	3	1	1	1	50.2
E7ETR0	RuvB-like helicase OS=Homo sapiens OX=9606 GN=RUVBL1 PE=1 SV=1	RUVBL1	6	1	1	1	34.8
A7XZE4	Beta tropomyosin isoform OS=Homo sapiens OX=9606 GN=TPM2 PE=1 SV=1	TPM2	18	5	15	2	33	1.16645e+06									2.98492e+06			0.532									1.611
Q5VY30	Retinol-binding protein OS=Homo sapiens OX=9606 GN=RBP4 PE=1 SV=2	RBP4	78	17	2302	17	23	9.67317e+09	5.65623e+09	7.756e+09	1.88012e+09	5.61416e+09	2.06613e+10	8.06341e+09	5.09229e+09	6.72522e+09	3.30022e+09	6.66413e+09	2.19362e+10	1.066	1.231	1.387	0.342	1.127	1.881	1.219	0.965	1.149	0.431	1.255	2.349	1.063	0.626535
Q86X91	Inactive tyrosine-protein kinase 7 OS=Homo sapiens OX=9606 GN=PTK7 PE=1 SV=1	PTK7	3	1	1	1	50.4	8.70949e+06	1.40644e+07	6.58515e+06	1.05749e+07	7.85653e+06	1.72673e+07	2.32326e+07	7.25993e+06	1.13053e+07	50732012	5.42451e+06	1.86336e+07
J3KTL2	Serine/arginine-rich splicing factor 1 OS=Homo sapiens OX=9606 GN=SRSF1 PE=1 SV=1	SRSF1	13	3	3	3	28.3	2.01637e+06												0.946
G3V3A0	Alpha-1-antichymotrypsin OS=Homo sapiens OX=9606 GN=SERPINA3 PE=1 SV=1	SERPINA3	81	23	534	1	23.4	1.09464e+06	1.48959e+06	1.4577e+06	499157	1.83932e+06		850028	1.02224e+06	910595	524708	985672	431767
B4DPQ0	Complement subcomponent C1r OS=Homo sapiens OX=9606 GN=C1R PE=1 SV=1	C1R	24	13	32	13	81.8	1.29525e+06	153992	3.08887e+06	1.18455e+06	1.89006e+06	1.30768e+07	1.81605e+06		2.16541e+07	1.18188e+06	731393	8.12628e+06	0.249	0.058	0.962	0.376	0.661	2.074	0.478		6.444	0.269	0.24	1.516	2.086	0.742006
H0YB34	2-iminobutanoate/2-iminopropanoate deaminase (Fragment) OS=Homo sapiens OX=9606 GN=RIDA PE=1 SV=1	RIDA	26	3	5	3	16	1.38419e+06					8.65392e+06	1.3191e+06			191572		5.83256e+06	0.377					1.946	0.492			0.062		1.543	1.049	0.956391
A0A5F9ZHN5	Ankyrin-2 OS=Homo sapiens OX=9606 GN=ANK2 PE=1 SV=1	ANK2	0	1	7	1	427.6	927730	3.19203e+06	1.81259e+06	1.81167e+06	562278	2.13113e+06	823033	4.72896e+06	2.99312e+06	2.55632e+06	507652	1.22776e+06
H0Y8P3	LIM and calponin homology domains-containing protein 1 (Fragment) OS=Homo sapiens OX=9606 GN=LIMCH1 PE=1 SV=1	LIMCH1	1	1	9	1	103.4	3.71759e+06	833408	1.21617e+06	1.21433e+06	1.4692e+06	3.07961e+06	4.75917e+06	778471	1.37409e+06	2.01707e+06	2.36642e+06	3.92789e+06
H0Y5X7	CCR4-NOT transcription complex subunit 3 (Fragment) OS=Homo sapiens OX=9606 GN=CNOT3 PE=1 SV=1	CNOT3	7	1	1	1	31.3	922034						932659
A0A0G2JL54	C4a anaphylatoxin OS=Homo sapiens OX=9606 GN=C4B_2 PE=1 SV=1	C4B_2	52	92	1646	3	187.6	1.64736e+08	1.24217e+08	1.36265e+08	1.34462e+08	2.52646e+08	1.21675e+08	1.79601e+08	1.28007e+08	1.34592e+08	1.38759e+08	1.96479e+08	1.01522e+08	1.031	1.536	1.384	1.391	2.883	0.629	1.542	1.379	1.306	1.029	2.103	0.618	0.965	0.561456
A8MT72	Reticulon OS=Homo sapiens OX=9606 GN=RTN1 PE=1 SV=1	RTN1	4	1	2	1	21.8	765875						474162
V9GYM3	Apolipoprotein A-II OS=Homo sapiens OX=9606 GN=APOA2 PE=1 SV=1	APOA2	32	9	150	9	14.9	7.13857e+07	3.73696e+08	4.10528e+08	3.59348e+08	7.44758e+08	3.50788e+08	7.07658e+08	1.95709e+08	2.39612e+08	4.91153e+08	1.03549e+09	3.58591e+08	0.152	1.569	1.416	1.263	2.886	0.616	2.064	0.716	0.79	1.237	3.764	0.741	3.013	0.59939
F8VZQ9	SAP domain-containing ribonucleoprotein OS=Homo sapiens OX=9606 GN=SARNP PE=1 SV=1	SARNP	5	1	1	1	24.1	1.00705e+06	792842	355446		464459				585132	413294	511175
H7C2L7	Tetratricopeptide repeat protein 38 (Fragment) OS=Homo sapiens OX=9606 GN=TTC38 PE=1 SV=1	TTC38	10	1	2	1	23.7
J3KPQ0	Fibroblast growth factor receptor OS=Homo sapiens OX=9606 GN=FGFR4 PE=1 SV=1	FGFR4	3	2	2	1	80.4					2.92657e+06	911165					1.57561e+06
E9PCY7	Heterogeneous nuclear ribonucleoprotein H OS=Homo sapiens OX=9606 GN=HNRNPH1 PE=1 SV=1	HNRNPH1	14	5	6	3	47.1	8.70509e+06		894515			512074	64455.1	58944.9	46047.9	145297	121686	156618	6.923		1.154			0.336	0.07	0.081	0.057	0.137	0.165	0.121	0.14	0.108621
C9JEM6	Ephrin type-A receptor 4 (Fragment) OS=Homo sapiens OX=9606 GN=EPHA4 PE=1 SV=1	EPHA4	14	1	1	1	14.8	402586	359390		278600	659092	303272		366480	236154	334105		353122
G3V4P8	Glia maturation factor beta (Fragment) OS=Homo sapiens OX=9606 GN=GMFB PE=1 SV=1	GMFB	26	3	14	2	17.5	177667					7.67123e+06						2.71007e+06	0.048					1.703						0.708	0.416
A0A1B0GVN9	Uroporphyrinogen decarboxylase OS=Homo sapiens OX=9606 GN=UROD PE=1 SV=1	UROD	5	1	1	1	33.2	1.27128e+06										1.0259e+06
A0A1B0GUH5	Ceramidase OS=Homo sapiens OX=9606 GN=ASAH1 PE=1 SV=1	ASAH1	41	16	158	16	44.4	1.14126e+08	2.47639e+07	9.38414e+07	1.51027e+08	1.69364e+07	5.27058e+07	5.15939e+07	4.50723e+07	1.04589e+08	3.54423e+07	2.97004e+07	3.51525e+07	1.716	0.735	2.289	3.753	0.464	0.655	1.064	1.166	2.438	0.631	0.763	0.514	0.978	0.505868
J3KT17	Galectin OS=Homo sapiens OX=9606 GN=LGALS9C PE=4 SV=1	LGALS9C	5	1	4	1	25.6			1.69788e+06	2.2182e+06		2.32141e+06	1.19046e+06			1.89638e+06		1.62526e+06
Q53Z42	HLA class I antigen OS=Homo sapiens OX=9606 GN=HLA-A PE=1 SV=1	HLA-A	16	6	17	1	40.9			600301		1.34271e+06	7.11736e+06		398325			1.19902e+06
I3L397	Eukaryotic translation initiation factor 5A (Fragment) OS=Homo sapiens OX=9606 GN=EIF5A PE=1 SV=8	EIF5A	32	5	15	5	16	1.48445e+07		428762	577190	841072	3.05508e+06	889741	460677	734599	3.5415e+06	1.05155e+06	2.26812e+06	5.383		0.252	0.346	0.556	0.915	0.443	0.287	0.413	1.521	0.652	0.799	1.633	0.886838
A0A087WV05	Uncharacterized protein OS=Homo sapiens OX=9606 PE=3 SV=1	--	18	1	1	1	12.7	838200
A0A3B3IS80	Fructose-bisphosphate aldolase OS=Homo sapiens OX=9606 GN=ALDOB PE=1 SV=1	ALDOB	38	11	44	10	37.3	8.57013e+06	3.12765e+06	1.43136e+07	1.50796e+07	8.13932e+06	2.11847e+07	3.27527e+06	5.38096e+06	3.27437e+07	4.59304e+06	2.89822e+06	3.29997e+06	0.793	0.572	2.15	2.307	1.373	1.621	0.416	0.857	4.699	0.504	0.459	0.297	0.824	0.191807
B4DJC3	Histone H2A OS=Homo sapiens OX=9606 GN=MACROH2A1 PE=1 SV=1	MACROH2A1	19	3	4	3	21.5	5.37289e+06											897516	1.621											0.263
Q5TDG9	DnaJ homolog subfamily C member 16 OS=Homo sapiens OX=9606 GN=DNAJC16 PE=1 SV=1	DNAJC16	1	1	2	1	69.3	2.14619e+06						2.07944e+06
J3QLI8	2-oxoglutarate and iron-dependent oxygenase domain-containing protein 3 OS=Homo sapiens OX=9606 GN=OGFOD3 PE=1 SV=1	OGFOD3	11	1	1	1	14				465335				591139
C9JQ41	Coiled-coil domain-containing protein 58 OS=Homo sapiens OX=9606 GN=MIX23 PE=1 SV=1	MIX23	7	1	1	1	15.3	569770
A0A7I2V5F1	DNA (cytosine-5)-methyltransferase OS=Homo sapiens OX=9606 GN=DNMT1 PE=1 SV=1	DNMT1	1	1	1	1	179.3
H0YBX6	Ubiquitin-conjugating enzyme E2 variant 2 (Fragment) OS=Homo sapiens OX=9606 GN=UBE2V2 PE=1 SV=1	UBE2V2	13	2	4	2	16.9	7.67488e+06	3.7692e+06	4.07584e+06	4.35909e+06	2.12798e+06	5.91744e+06	2.90653e+06	4.81516e+06	5.62576e+06	6.12961e+06	3.17053e+06	6.96037e+06	1.514	1.468	1.305	1.421	0.765	0.965	0.787	1.634	1.721	1.433	1.069	1.335	1.123	0.684362
Q5I0G2	Growth hormone A1 OS=Homo sapiens OX=9606 GN=PRL PE=1 SV=1	PRL	28	4	18	4	25.9	3.8058e+06	289313	977238	208896	409664	1.49798e+07	1.01487e+07	502940	481346	527999	783472	9.84608e+06	1.006	0.151	0.419	0.091	0.197	3.27	3.678	0.229	0.197	0.165	0.354	2.528	1.671	0.335148
J3KQ18	D-dopachrome decarboxylase OS=Homo sapiens OX=9606 GN=DDT PE=1 SV=1	DDT	34	4	21	4	14.2	1.45868e+07	3.91207e+06	4.76413e+06	3.24249e+06	2.83576e+06	1.90828e+07	7.52307e+06	5.05872e+06	9.66473e+06	7503793	5.51371e+06	1.33916e+07	1.705	0.903	0.904	0.627	0.604	1.844	1.207	1.017	1.752	1.039	1.102	1.522	1.347	0.255538
E9PK25	Cofilin, non-muscle isoform OS=Homo sapiens OX=9606 GN=CFL1 PE=1 SV=1	CFL1	44	12	43	9	22.7	1.21048e+08	2.71669e+07	4.0076e+07	3.28659e+07	4.58492e+07	4.87158e+07	3.27004e+07	2.75861e+07	3.4753e+07	4.623e+07	4.12554e+07	5.62612e+07	2.478	1.098	1.331	1.112	1.711	0.824	0.918	0.971	1.103	1.121	1.444	1.119	0.882	0.3236
A0A7P0Z4C4	Cathepsin O OS=Homo sapiens OX=9606 GN=CTSO PE=4 SV=1	CTSO	5	1	1	1	35.9
A0A7P0T9A7	Adenylosuccinate lyase OS=Homo sapiens OX=9606 GN=ADSL PE=4 SV=1	ADSL	5	1	1	1	57.9
A6QRJ1	V-type proton ATPase subunit S1 (Fragment) OS=Homo sapiens OX=9606 GN=ATP6AP1 PE=1 SV=1	ATP6AP1	17	3	9	3	24.9						1.90273e+07	1.67617e+06					1.19843e+07						1.365	0.2					1.011	0.741
A0A2R8Y3T0	Cochlin OS=Homo sapiens OX=9606 GN=COCH PE=1 SV=1	COCH	4	2	58	2	55.4	1.12651e+07	1.27477e+07	1.14985e+07	5.22618e+06	2.88867e+06	2.5116e+07	2.04616e+07	1.00712e+07	1.21201e+07	1.07903e+07	4.70299e+06	1.96032e+07	0.873	1.95	1.446	0.669	0.408	1.608	2.175	1.342	1.456	0.99	0.623	1.476	1.352	0.305618
A0A0J9YVU5	Immunoglobulin heavy variable 2-70 (Fragment) OS=Homo sapiens OX=9606 GN=IGHV2-70 PE=1 SV=1	IGHV2-70	12	2	25	2	13.4	117055	1.23582e+07	4.35882e+06	8.97886e+06	241798	2.58189e+07	526279	1.5546e+07	7.64278e+06	1.22956e+07	402816	3.15115e+07	0.011	2.312	0.67	1.406	0.042	2.021	0.068	2.534	1.123	1.38	0.065	2.902	2.153	0.105101
E7EQ64	Trypsin-1 OS=Homo sapiens OX=9606 GN=PRSS1 PE=1 SV=1	PRSS1	34	9	57	5	28.1	1.55684e+07	6.1367e+06	6.94139e+06	864179	4.62687e+06	1.41088e+08	2.85734e+07	3.71414e+06	1.1967e+07	1.16999e+07	7.13397e+06	1.35641e+08	0.473	0.368	0.342	0.043	0.256	3.538	1.19	0.194	0.563	0.421	0.37	4.002	2.843	0.197188
H0Y614	Ubiquitin-fold modifier 1 (Fragment) OS=Homo sapiens OX=9606 GN=UFM1 PE=1 SV=1	UFM1	27	2	12	2	8.7	3.69034e+06	2.05534e+06	2.68497e+06		2.13522e+06	2.64049e+07	3.12903e+06	1.29135e+06	1.73762e+06	1.19148e+06	2.1473e+06	1.88181e+07	0.588	0.647	0.694		0.62	3.477	0.684	0.354	0.429	0.225	0.585	2.915	0.822	0.16554
A0A494C1L5	Lipopolysaccharide-responsive and beige-like anchor protein OS=Homo sapiens OX=9606 GN=LRBA PE=1 SV=1	LRBA	0	1	1	1	317.6	930989											4.54894e+06
S4R3G0	Serine/arginine-rich-splicing factor 9 OS=Homo sapiens OX=9606 GN=SRSF9 PE=1 SV=1	SRSF9	17	2	2	2	13.8	2.85136e+06					2.4186e+06							1.024					0.717
E9PQN9	Interferon-induced transmembrane protein 2 OS=Homo sapiens OX=9606 GN=IFITM2 PE=3 SV=1	IFITM2	14	1	2	1	12.4
J3KS05	Chromobox protein homolog 1 (Fragment) OS=Homo sapiens OX=9606 GN=CBX1 PE=1 SV=8	CBX1	16	2	3	1	20	493336					402194
Q5T7F0	Neuropilin OS=Homo sapiens OX=9606 GN=NRP1 PE=1 SV=1	NRP1	10	5	10	5	79	1.54781e+06	334774	1.24107e+06	698878	508982	2.25378e+06	1.90106e+06	674012	215162	939612		1.46612e+06	1.367	0.584	1.778	1.02	0.819	1.645	2.303	1.024	0.295	0.983		1.259	1.067	0.659945
C9JFR7	Cytochrome c (Fragment) OS=Homo sapiens OX=9606 GN=CYCS PE=1 SV=1	CYCS	18	2	11	2	11.3	649315	314651	530109	508754	221584	829738		400171	1.16874e+06	3.20654e+06	164584	426656	0.802	0.768	1.063	1.039	0.499	0.847		0.851	2.239	4.693	0.348	0.512	1.807	0.468245
A0A1B0GW23	N-acyl-L-amino-acid amidohydrolase (Fragment) OS=Homo sapiens OX=9606 GN=ABHD14A-ACY1 PE=3 SV=1	ABHD14A-ACY1	6	4	10	4	65.4	3.26247e+06	3.94783e+06	8.60064e+06	8.79325e+06	1.27959e+07	1.94023e+07	1.04696e+07	2.58561e+06	6.61545e+06	7740889	9.76459e+06		0.361	0.863	1.545	1.609	2.582	1.775	1.59	0.492	1.135	1.015	1.848		1.411	0.928415
B7Z6Z4	Myosin light polypeptide 6 OS=Homo sapiens OX=9606 GN=MYL6 PE=1 SV=1	MYL6	17	3	6	3	26.7	4.76863e+06	1.41558e+06	4.46086e+06	627437	1.11789e+06	1.83956e+06	2.36455e+06			2.11496e+06	884614	833061	2.208	1.294	3.352	0.48	0.943	0.704	1.502			1.16	0.7	0.375	1.093	0.770547
H7C2L4	Transformer-2 protein homolog beta (Fragment) OS=Homo sapiens OX=9606 GN=TRA2B PE=1 SV=1	TRA2B	7	1	1	1	12.7	7.25492e+06
H7C2N1	Prothymosin alpha (Fragment) OS=Homo sapiens OX=9606 GN=PTMA PE=1 SV=1	PTMA	17	4	39	4	15.8	3.81934e+07	2.23202e+06	4.3081e+06	4.71605e+06	2.05971e+06	2.71908e+08	3.13261e+06	1.14347e+06	8.44618e+06	5.6084e+06	5.50568e+06	5.19423e+06	1.23	0.142	0.225	0.251	0.121	7.236	0.138	0.063	0.422	0.214	0.303	0.163	0.968	0.275096
A0A7P0TA97	Protein disulfide-isomerase OS=Homo sapiens OX=9606 GN=P4HB PE=4 SV=1	P4HB	34	15	61	15	53.5	9.18562e+07	1.01384e+08	7.7335e+07	8.43882e+07	7.86643e+07	1.18719e+08	8.32772e+07	1.03206e+08	9.04846e+07	8.80258e+07	9.08773e+07	1.11724e+08	0.931	2.029	1.272	1.413	1.453	0.994	1.158	1.799	1.422	1.057	1.575	1.101	1.031	0.8323
A0A669KBE7	ADAMTS-like protein 4 OS=Homo sapiens OX=9606 GN=ADAMTSL4 PE=1 SV=1	ADAMTSL4	6	3	3	3	111.9						1.91098e+06		1.14345e+06				1.73534e+06						0.935		1.165				0.999	1.068
I3L325	Ketimine reductase mu-crystallin (Fragment) OS=Homo sapiens OX=9606 GN=CRYM PE=1 SV=1	CRYM	4	1	1	1	26.1									232254	91389.6
Q5VU80	Ubiquitin-associated protein 2-like (Fragment) OS=Homo sapiens OX=9606 GN=UBAP2L PE=1 SV=1	UBAP2L	7	1	1	1	25.7	335481
J3KR44	Ubiquitin thioesterase OS=Homo sapiens OX=9606 GN=OTUB1 PE=1 SV=2	OTUB1	17	4	11	4	31.4	5.51368e+06	1.81158e+06	3.13301e+06	505970	1.73283e+06	1.49842e+07	3.68583e+06	2.00072e+06	438027	3.20847e+06	910406	8.82992e+06	1.339	0.868	1.234	0.203	0.767	3.006	1.227	0.835	0.165	0.923	0.378	2.084	1.291	0.569986
H7C2R7	Spermine synthase (Fragment) OS=Homo sapiens OX=9606 GN=SMS PE=1 SV=1	SMS	3	1	1	1	33.5	127418							74231.9		85740.5
A0A0C4DGB6	Albumin OS=Homo sapiens OX=9606 GN=ALB PE=1 SV=1	ALB	93	270	61754	69	69.2	4.25083e+11	5.42066e+11	5.11661e+11	5.15174e+11	4.36709e+11	3.56183e+11	4.19115e+11	5.11787e+11	5.26222e+11	4.75031e+11	4.40434e+11	3.65951e+11	0.873	2.199	1.705	1.749	1.635	0.605	1.181	1.808	1.676	1.156	1.547	0.731	0.996	0.775114
Q5T6W2	Heterogeneous nuclear ribonucleoprotein K (Fragment) OS=Homo sapiens OX=9606 GN=HNRNPK PE=1 SV=1	HNRNPK	24	8	9	1	41.8
F8W031	DUF3456 domain-containing protein (Fragment) OS=Homo sapiens OX=9606 PE=1 SV=1	--	16	4	7	4	29.2	1.69552e+06	66630.1	354576	896414	170391	4.96014e+06	1.18898e+06	121658	599468	155728	194493	3.05262e+06	1.43	0.111	0.485	1.25	0.262	3.457	1.376	0.177	0.784	0.156	0.28	2.503	1.015	0.567489
H3BMA1	Mesothelin (Fragment) OS=Homo sapiens OX=9606 GN=MSLN PE=1 SV=2	MSLN	20	5	7	1	37.6				2.06674e+06		6.53328e+06				1.36805e+06		1.94225e+06
E9PP05	Leucine zipper protein 2 (Fragment) OS=Homo sapiens OX=9606 GN=LUZP2 PE=1 SV=1	LUZP2	4	1	2	1	20.4		6.95286e+06				719567		4.64689e+06		1379942		1.34718e+06
E9PN59	Fas apoptotic inhibitory molecule 3 (Fragment) OS=Homo sapiens OX=9606 GN=FCMR PE=1 SV=1	FCMR	8	1	1	1	17.2						2.01357e+06						1.18427e+06
M0R2W8	N-acetylmuramoyl-L-alanine amidase (Fragment) OS=Homo sapiens OX=9606 GN=PGLYRP2 PE=1 SV=2	PGLYRP2	41	4	37	1	19.5	1.60649e+06	3.64337e+06	2.36388e+06	2.39937e+06	2.90807e+06	1.82183e+06	2.29593e+06	2.90645e+06			3.47143e+06	3.09468e+06
A0A286YEY4	Immunoglobulin heavy constant gamma 2 (Fragment) OS=Homo sapiens OX=9606 GN=IGHG2 PE=1 SV=1	IGHG2	68	59	5971	16	43.8	8.76513e+09	6.80245e+09	4.77955e+09	7.57024e+09	6.37203e+09	4.74117e+09	9.11359e+09	6.6198e+09	5.28916e+09	7.06852e+09	6.49305e+09	4.80005e+09	1.269	1.944	1.123	1.811	1.681	0.567	1.81	1.648	1.187	1.212	1.607	0.675	1.024	0.968458
C9JUP7	15S Mg(2+)-ATPase p97 subunit OS=Homo sapiens OX=9606 GN=VCP PE=1 SV=2	VCP	7	5	11	5	84.5	4.34233e+06	68348.9	1.84503e+06	522791	127322	126300	245740	55945.2	2.07768e+06	3.44137e+06	82949.1	450624	3.682	0.114	2.538	0.733	0.197	0.088	0.286	0.082	2.731	3.457	0.12	0.371	1.902	0.934827
H0YKB3	Sorbitol dehydrogenase OS=Homo sapiens OX=9606 GN=SORD PE=1 SV=1	SORD	13	1	3	1	12.7	774813		505954						1.67124e+06	674259
A0A087WVM2	CD177 antigen OS=Homo sapiens OX=9606 GN=CD177 PE=1 SV=1	CD177	2	1	1	1	46.4	1.01522e+07	1.76072e+06	2.25073e+06	2.10329e+06	1.80517e+06	5.61719e+06	7.81695e+06	2.50533e+06	2.79227e+06	2401484	2.81462e+06	4.44892e+06
M0R0R2	40S ribosomal protein S5 OS=Homo sapiens OX=9606 GN=RPS5 PE=1 SV=1	RPS5	8	2	3	2	25.3	1.87547e+06		226282		607167	969498			195786		445179	503666	2.575		0.504		1.519	1.1			0.417		1.045	0.672	0.709	0.0574481
C9JD32	60S ribosomal protein L23 (Fragment) OS=Homo sapiens OX=9606 GN=RPL23 PE=1 SV=1	RPL23	8	1	1	1	9.7	159893
H0Y3T6	45 kDa calcium-binding protein (Fragment) OS=Homo sapiens OX=9606 GN=SDF4 PE=1 SV=1	SDF4	15	3	7	3	28.1	798438			680917	233035	2.38133e+06	303851	172366	146080			1.55491e+06	0.963			1.358	0.513	2.374	0.503	0.358	0.273			1.824	0.645	0.254592
H0Y4Y4	EF-hand domain-containing protein D2 (Fragment) OS=Homo sapiens OX=9606 GN=EFHD2 PE=1 SV=1	EFHD2	9	2	5	2	19.6									200790			944353									0.514			1.516
F8W111	Carboxypeptidase M (Fragment) OS=Homo sapiens OX=9606 GN=CPM PE=1 SV=1	CPM	20	5	23	5	28.3	1.58801e+06	848630	2.39569e+06	1.20352e+06	282150	3.11789e+06	1.21613e+06	1.3322e+06	4.65833e+06	2.82985e+06	361816	2.18075e+06	0.819	0.864	2.004	1.026	0.265	1.328	0.86	1.181	3.723	1.728	0.319	1.093	1.331	0.0997282
X6RLJ0	Complement C1q subcomponent subunit A (Fragment) OS=Homo sapiens OX=9606 GN=C1QA PE=1 SV=7	C1QA	5	1	1	1	23.3									3.34877e+06		872449	948992
H3BPK4	Myosin regulatory light chain 2, skeletal muscle isoform (Fragment) OS=Homo sapiens OX=9606 GN=MYLPF PE=1 SV=1	MYLPF	15	3	3	3	22						4.82013e+06						1.40837e+06						1.21						0.416	0.344
H3BUI9	Cytochrome b-c1 complex subunit 2, mitochondrial OS=Homo sapiens OX=9606 GN=UQCRC2 PE=1 SV=1	UQCRC2	11	1	1	1	14.2	1.03185e+06		194229
E9PKZ0	60S ribosomal protein L8 (Fragment) OS=Homo sapiens OX=9606 GN=RPL8 PE=1 SV=1	RPL8	5	1	1	1	22.4
E5RHN7	Phospholipase A1 (Fragment) OS=Homo sapiens OX=9606 GN=LPL PE=1 SV=8	LPL	8	1	2	1	11.6	530383	537690	904674	1.2609e+06	203104	600632	866367	624702	669641	1.58319e+06	298141	723333
A0A3B3ISX9	Tenascin-X OS=Homo sapiens OX=9606 GN=TNXB PE=1 SV=1	TNXB	13	29	91	29	485.1	1.1189e+08	7.62026e+07	1.1209e+08	6.85961e+07	4.94365e+07	1.9498e+08	1.05123e+08	1.02954e+08	1.19814e+08	8.79149e+07	7.72456e+07	1.34524e+08	1.024	1.377	1.664	1.037	0.824	1.474	1.319	1.62	1.699	0.953	1.208	1.196	1.114	0.374259
E7EMS7	Dermokine OS=Homo sapiens OX=9606 GN=DMKN PE=1 SV=1	DMKN	8	1	1	1	13.3			4.23942e+06			610726		1.41345e+06				200328
A0A0U1RRK2	FACT complex subunit SSRP1 (Fragment) OS=Homo sapiens OX=9606 GN=SSRP1 PE=1 SV=1	SSRP1	4	1	1	1	25.9	403175
A0A0A0MSV6	Complement C1q subcomponent subunit B (Fragment) OS=Homo sapiens OX=9606 GN=C1QB PE=1 SV=6	C1QB	16	3	6	3	24	470223			617635		5.81174e+06			4.0592e+06	1236872	1.1398e+06	1.94374e+06	0.204			0.442		2.081			2.727	0.635	0.844	0.819	0.915	0.73592
A0A087WVZ9	DNA-directed RNA polymerase II subunit E OS=Homo sapiens OX=9606 GN=POLR2E PE=1 SV=1	POLR2E	5	1	1	1	21.4
A0A0C4DGB5	Calpain inhibitor OS=Homo sapiens OX=9606 GN=CAST PE=1 SV=2	CAST	12	7	14	7	79.7	5.81171e+06	2.97172e+06	1.94058e+06	5.44178e+06	1.88783e+06	3.42691e+06	3.96155e+06	2.41292e+06	2.52657e+06	2.0805e+07	2.38103e+06	3.30944e+06	1.16	1.171	0.628	1.795	0.687	0.565	1.084	0.828	0.782	4.918	0.812	0.642	1.324	0.364454
E7EQB2	Lactotransferrin (Fragment) OS=Homo sapiens OX=9606 GN=LTF PE=1 SV=1	LTF	59	41	327	38	76.6	9.76374e+07	5.12997e+07	1.15732e+08	2.4413e+07	3.59473e+07	3.26081e+07	8.79903e+07	9.94495e+07	3.00696e+08	1.35299e+08	3.90717e+07	2.08455e+08	0.902	0.936	1.735	0.373	0.605	0.249	1.115	1.58	4.307	1.481	0.617	1.872	2.986	0.0409327
A0A3B3ISS6	Transmembrane glycoprotein NMB OS=Homo sapiens OX=9606 GN=GPNMB PE=1 SV=1	GPNMB	2	1	3	1	65.9	459661		756016	1.52328e+06		997057	597959		1.62307e+06	968502		590266
H0Y755	Low affinity immunoglobulin gamma Fc region receptor III-A OS=Homo sapiens OX=9606 GN=FCGR3A PE=1 SV=3	FCGR3A	4	1	4	1	28.9		381508	406207	2.3749e+06	677445	3.76532e+06	1.92469e+06			1.77164e+06		525421
M0QYT0	RRM domain-containing protein (Fragment) OS=Homo sapiens OX=9606 PE=1 SV=1	--	8	3	3	1	36	929653									314757		398062
H3BTP0	Cysteine-rich secretory protein LCCL domain-containing 2 (Fragment) OS=Homo sapiens OX=9606 GN=CRISPLD2 PE=1 SV=8	CRISPLD2	8	1	1	1	12.8									1.15354e+06
Q5VVC8	60S ribosomal protein L11 OS=Homo sapiens OX=9606 GN=RPL11 PE=1 SV=2	RPL11	23	4	12	4	19	6.76562e+06	1.54525e+06	1.72817e+06	1.10024e+06	1.3927e+06	1.716e+06		2.23518e+06	87858.8	1.27019e+06	69769.2	1.32052e+06	3.66	1.651	1.517	0.984	1.373	0.767		2.08	0.074	0.814	0.065	0.694	0.618	0.173873
C9IY88	3-hydroxyanthranilate 3,4-dioxygenase (Fragment) OS=Homo sapiens OX=9606 GN=HAAO PE=1 SV=8	HAAO	5	1	1	1	20.4	95846.4	105048				470065		182266			94369.2	469711
A0A0G2JMH6	HLA-DRA OS=Homo sapiens OX=9606 GN=HLA-DRA PE=1 SV=1	HLA-DRA	17	3	6	3	28.6
B1AHB1	DNA helicase OS=Homo sapiens OX=9606 GN=MCM5 PE=1 SV=1	MCM5	4	3	14	3	77.5	5.60877e+06	1.80754e+06	1.8543e+06	5.45691e+06	6.80441e+06	28071.1	4.59673e+06	2.61547e+06	6.00715e+06	9.68809e+06	471304	58420.1	1.415	0.9	0.759	2.275	3.128	0.006	1.591	1.135	2.349	2.895	0.203	0.014	1.525	0.962503
A0A6Q8PHP3	Alanine--tRNA ligase, cytoplasmic OS=Homo sapiens OX=9606 GN=AARS1 PE=1 SV=1	AARS1	3	2	2	2	60.2	1.00514e+06								1.1198e+06				0.895								1.545
A0A7I2V3Z0	ATP-dependent 6-phosphofructokinase OS=Homo sapiens OX=9606 GN=PFKP PE=1 SV=1	PFKP	1	1	1	1	81.7	224863		75352.8		60446.8				67816.1	196351
A0A4W8ZXM2	Immunoglobulin heavy variable 3-72 OS=Homo sapiens OX=9606 GN=IGHV3-72 PE=1 SV=1	IGHV3-72	79	13	374	5	11.2	4.40796e+08	1.89255e+08	1.70069e+08	2.20637e+08	3.37558e+08	2.0907e+08	4.86589e+08	1.9792e+08	1.81504e+08	2.83793e+08	3.91185e+08	2.10996e+08	1.507	1.278	0.944	1.247	2.104	0.591	2.282	1.164	0.962	1.15	2.287	0.701	1.107	0.319472
K7ELL7	Glucosidase 2 subunit beta OS=Homo sapiens OX=9606 GN=PRKCSH PE=1 SV=1	PRKCSH	19	10	42	10	60.2	2.27294e+07	4.02915e+06	4.09444e+06	7.42214e+06	5.50909e+06	3.92713e+07	1.98721e+07	4.42147e+06	4.6273e+06	7.79514e+06	7.35037e+06	2.64666e+07	1.68	0.588	0.491	0.907	0.742	2.398	2.014	0.562	0.53	0.682	0.929	1.901	1.005	0.883674
B3KSI3	Branched-chain-amino-acid aminotransferase OS=Homo sapiens OX=9606 GN=BCAT2 PE=1 SV=1	BCAT2	5	1	1	1	39.9
A0A087WUC4	Alcohol dehydrogenase 1C (Fragment) OS=Homo sapiens OX=9606 GN=ADH1C PE=1 SV=1	ADH1C	5	1	1	1	17.5				113307								214515
E9PNZ4	Microtubule-actin cross-linking factor 1, isoforms 1/2/3/5 (Fragment) OS=Homo sapiens OX=9606 GN=MACF1 PE=1 SV=1	MACF1	1	2	5	1	230.9										4.70306e+06
A0A096LPE2	SAA2-SAA4 readthrough OS=Homo sapiens OX=9606 GN=SAA2-SAA4 PE=3 SV=1	SAA2-SAA4	21	4	57	3	23.3	1.56017e+07	2.00657e+07	3.60233e+07	1.92687e+07	1.2269e+08	3.14867e+07	2.49573e+07	1.50223e+07	3.58953e+07	2.20596e+07	9.9217e+07	2.7119e+07	0.377	0.958	1.413	0.77	5.407	0.629	0.828	0.625	1.346	0.632	4.102	0.637	1.066	0.891799
A0A087X1G7	Selenoprotein F OS=Homo sapiens OX=9606 GN=SELENOF PE=1 SV=1	SELENOF	13	2	2	2	17.9						5.19196e+06						4.04033e+06						0.879						0.805	0.916
H0YF61	Sterol carrier protein 2 (Fragment) OS=Homo sapiens OX=9606 GN=SCP2 PE=1 SV=1	SCP2	12	2	4	2	15	1.63314e+06									1.19373e+06		160867	1.551									1.343		0.149
A0A0D9SEM4	Serine/arginine-rich-splicing factor 4 (Fragment) OS=Homo sapiens OX=9606 GN=SRSF4 PE=1 SV=1	SRSF4	2	1	1	1	43.6	1.01862e+06		253300			218581			174362	165634	98699.2	229344
F8VR77	Proliferation-associated protein 2G4 OS=Homo sapiens OX=9606 GN=PA2G4 PE=1 SV=1	PA2G4	6	2	2	2	31.4	773937	64401.3							489356				1.654	0.272							1.621
J3KS52	CMRF35-like molecule 1 OS=Homo sapiens OX=9606 GN=CD300LF PE=1 SV=1	CD300LF	4	1	1	1	33.8						3.41548e+06	3.59025e+06			1.90322e+06
A0A494C0L6	Thymidine phosphorylase (Fragment) OS=Homo sapiens OX=9606 GN=TYMP PE=1 SV=1	TYMP	5	1	4	1	29.7	210347
O95716	Ras-related protein Rab-3D OS=Homo sapiens OX=9606 GN=RAB3D PE=1 SV=1	RAB3D	10	2	8	1	24.3	311318	3.15783e+06	3.21721e+06	1.53873e+06		1.40556e+06		3.83264e+06	1.1265e+06	1.93084e+06	467903	1.60387e+06
P62277	40S ribosomal protein S13 OS=Homo sapiens OX=9606 GN=RPS13 PE=1 SV=2	RPS13	17	2	2	2	17.2	4.18731e+06	1.1361e+06				2.45407e+06						752404	1.857	0.995				0.899						0.324	0.36
P02743	Serum amyloid P-component OS=Homo sapiens OX=9606 GN=APCS PE=1 SV=2	APCS	44	10	133	10	25.4	1.07382e+08	8.58657e+07	1.67782e+08	5.31705e+07	2.35555e+08	1.3098e+08	1.147e+08	1.49702e+08	1.96453e+08	8.21503e+07	1.94022e+08	1.70103e+08	0.722	1.14	1.831	0.591	2.887	0.728	1.058	1.732	2.048	0.654	2.231	1.112	1.252	0.131734
P05543	Thyroxine-binding globulin OS=Homo sapiens OX=9606 GN=SERPINA7 PE=1 SV=2	SERPINA7	42	15	301	14	46.3	4.39829e+08	3.50504e+08	3.22074e+08	4.00724e+08	2.48142e+08	1.24926e+08	2.61411e+08	3.66235e+08	2.53574e+08	3.29187e+08	2.60613e+08	1.11139e+08	1.439	2.265	1.71	2.167	1.48	0.338	1.173	2.062	1.286	1.276	1.458	0.354	0.85	0.089008
A0A075B6H7	Probable non-functional immunoglobulin kappa variable 3-7 OS=Homo sapiens OX=9606 GN=IGKV3-7 PE=1 SV=1	IGKV3-7	32	6	112	2	12.8	5.28332e+08	2.51329e+08	2.85499e+08	2.33064e+08	4.01977e+08	1.31299e+09	5.17278e+08	2.98089e+08	2.23138e+08	3.53521e+08	4.14357e+08	8.07316e+08	1.066	1.001	0.934	0.777	1.478	2.188	1.431	1.034	0.698	0.845	1.429	1.583	0.983	0.696573
Q8TEQ8	GPI ethanolamine phosphate transferase 3 OS=Homo sapiens OX=9606 GN=PIGO PE=1 SV=3	PIGO	1	1	1	1	118.6	681954									705682
P62753	40S ribosomal protein S6 OS=Homo sapiens OX=9606 GN=RPS6 PE=1 SV=1	RPS6	17	4	5	4	28.7	1.50096e+07	682470	5.88645e+06		106892	3.82435e+06	1.01547e+07			1.49715e+06		3.96223e+06	2.762	0.248	1.758		0.036	0.581	2.563			0.326		0.709	1.074	0.728715
Q15459	Splicing factor 3A subunit 1 OS=Homo sapiens OX=9606 GN=SF3A1 PE=1 SV=1	SF3A1	3	2	16	2	88.8	1.11426e+07	6.3496e+06	2.95438e+06	6.62341e+06	1.36227e+07	7.95193e+06	1.1002e+07	6.46521e+06	3.32236e+06	8.83512e+06	1.18835e+07	1.41139e+07	1.213	1.365	0.522	1.192	2.703	0.715	1.643	1.211	0.561	1.139	2.212	1.493	1.196	0.420634
P55000	Secreted Ly-6/uPAR-related protein 1 OS=Homo sapiens OX=9606 GN=SLURP1 PE=1 SV=2	SLURP1	9	1	7	1	11.2	496348		183958							149163
Q13296	Mammaglobin-A OS=Homo sapiens OX=9606 GN=SCGB2A2 PE=1 SV=1	SCGB2A2	9	1	1	1	10.5
P40227	T-complex protein 1 subunit zeta OS=Homo sapiens OX=9606 GN=CCT6A PE=1 SV=3	CCT6A	7	3	4	3	58	3.23072e+06							147847	626027	1.31425e+06			2.298							0.181	0.69	1.107
P13727	Bone marrow proteoglycan OS=Homo sapiens OX=9606 GN=PRG2 PE=1 SV=2	PRG2	15	3	18	3	25.2	1.59098e+06	1.74331e+06	1.6016e+06	2.35664e+06	1.55352e+06	4.31412e+06	1.14261e+06	4.15024e+06	721919	2.75547e+06	766678	3.6118e+06	0.686	1.485	1.121	1.68	1.222	1.538	0.676	3.08	0.483	1.408	0.566	1.515	0.963	0.476388
P61026	Ras-related protein Rab-10 OS=Homo sapiens OX=9606 GN=RAB10 PE=1 SV=1	RAB10	26	5	9	3	22.5	5.46427e+06	456275		65822.5		711382		7108.31	808164	2.50116e+06	221569	4.68934e+06	3.117	0.514		0.062		0.335		0.007	0.715	1.69	0.216	2.6	11.678	0.894576
P06703	Protein S100-A6 OS=Homo sapiens OX=9606 GN=S100A6 PE=1 SV=1	S100A6	17	2	31	2	10.2	6.0354e+06	3.79584e+06	1.48078e+07	1.49601e+07	5.93919e+06	1.0997e+07	5.63199e+06	4.4481e+06	1.77763e+07	26581687	5.18424e+06	9.76152e+06	0.544	0.676	2.166	2.229	0.976	0.819	0.696	0.69	2.484	2.838	0.799	0.855	1.097	0.287534
Q01105	Protein SET OS=Homo sapiens OX=9606 GN=SET PE=1 SV=3	SET	6	1	2	1	33.5
P16949	Stathmin OS=Homo sapiens OX=9606 GN=STMN1 PE=1 SV=3	STMN1	24	4	5	4	17.3	1.19409e+07		490311	339130	239888	1.33285e+06	690870	281311		436832		611195	6.212		0.414	0.292	0.227	0.573	0.493	0.252		0.269		0.309	0.513	0.284546
Q99983	Osteomodulin OS=Homo sapiens OX=9606 GN=OMD PE=1 SV=1	OMD	2	1	11	1	49.5	6.62125e+06				1.18755e+07	1.03162e+07	6.8542e+06			6823416	8.45989e+06	7.80302e+06
P27918	Properdin OS=Homo sapiens OX=9606 GN=CFP PE=1 SV=2	CFP	17	5	23	5	51.2	364355		1.5842e+06		3.81432e+06	5.31271e+06	1.98979e+06	695009	4.21448e+06	872560	4.23634e+06	6.00781e+06	0.118		0.836		2.26	1.427	0.887	0.389	2.124	0.336	2.355	1.899	3.108	0.160493
P28070	Proteasome subunit beta type-4 OS=Homo sapiens OX=9606 GN=PSMB4 PE=1 SV=4	PSMB4	8	1	1	1	29.2	3.37528e+06	3.65017e+06	2.51085e+06	3.85106e+06	2.43695e+06	2.05697e+06	4.43406e+06	4.14784e+06	2.52073e+06	3.87745e+06	3.42752e+06	2.31919e+06
P18754	Regulator of chromosome condensation OS=Homo sapiens OX=9606 GN=RCC1 PE=1 SV=1	RCC1	5	1	1	1	44.9
Q06141	Regenerating islet-derived protein 3-alpha OS=Homo sapiens OX=9606 GN=REG3A PE=1 SV=1	REG3A	33	4	25	4	19.4	1.21484e+06	3.23148e+06	2.65078e+06	671368	7.78747e+06	5.41853e+07	9.14038e+06	5.19112e+06	1.57248e+06	1.83543e+06	7.72484e+06	8.55595e+07	0.076	0.401	0.27	0.07	0.891	2.811	0.787	0.561	0.153	0.137	0.829	5.222	2.844	0.22867
P34096	Ribonuclease 4 OS=Homo sapiens OX=9606 GN=RNASE4 PE=1 SV=3	RNASE4	35	4	65	4	16.8	6.92023e+06	4.60953e+06	2.05444e+06	2.62208e+06	1.59087e+07	1.81077e+08	6.02367e+06	5.53269e+06	2.54753e+06	5.35348e+06	1.95171e+07	2.94887e+08	0.144	0.189	0.069	0.09	0.602	3.104	0.171	0.197	0.082	0.132	0.692	5.947	1.325	0.0348497
P25398	40S ribosomal protein S12 OS=Homo sapiens OX=9606 GN=RPS12 PE=1 SV=3	RPS12	25	3	4	3	14.5	5.28894e+06					228392				805215		301953	3.021					0.108				0.545		0.168	1.556
P08865	40S ribosomal protein SA OS=Homo sapiens OX=9606 GN=RPSA PE=1 SV=4	RPSA	13	2	3	2	32.8	1.26162e+06												0.946
O95197	Reticulon-3 OS=Homo sapiens OX=9606 GN=RTN3 PE=1 SV=2	RTN3	1	1	2	1	112.5	4.25379e+06									1.39715e+06
Q8WXD2	Secretogranin-3 OS=Homo sapiens OX=9606 GN=SCG3 PE=1 SV=3	SCG3	1	1	2	1	53		62239.6	124479		77996.9	671023	98225.3	58526	115926	103399	96700.9	963614
P0DP57	Secreted Ly-6/uPAR domain-containing protein 2 OS=Homo sapiens OX=9606 GN=SLURP2 PE=1 SV=1	SLURP2	25	2	4	2	10.2						511848												0.782
P49458	Signal recognition particle 9 kDa protein OS=Homo sapiens OX=9606 GN=SRP9 PE=1 SV=2	SRP9	29	3	3	3	10.1	2.70736e+06												0.946
Q99969	Retinoic acid receptor responder protein 2 OS=Homo sapiens OX=9606 GN=RARRES2 PE=1 SV=1	RARRES2	39	5	39	5	18.6	6.45162e+06	900685	1.10113e+06	689979	6.64756e+06	1.4029e+08	8.69478e+06	4.91825e+06		6.55403e+06	1.29521e+07	2.20483e+08	0.164	0.045	0.045	0.029	0.308	2.944	0.303	0.215		0.197	0.562	5.443	3.418	0.0197539
P62851	40S ribosomal protein S25 OS=Homo sapiens OX=9606 GN=RPS25 PE=1 SV=1	RPS25	14	3	6	3	13.7	4.23119e+06					5.70781e+06				252221		2.93639e+06	1.219					1.359				0.086		0.823	0.606
P35237	Serpin B6 OS=Homo sapiens OX=9606 GN=SERPINB6 PE=1 SV=3	SERPINB6	24	8	33	8	42.6	4.80806e+06	1.50904e+06	2.5357e+06	2.75168e+06	488336	2.21947e+07	3.68669e+06	2.69921e+06	1.10778e+06	6.85617e+06	2.37427e+06	1.31941e+07	0.85	0.527	0.727	0.804	0.157	3.242	0.894	0.821	0.304	1.436	0.718	2.267	1.681	0.530759
O60279	Sushi domain-containing protein 5 OS=Homo sapiens OX=9606 GN=SUSD5 PE=1 SV=3	SUSD5	7	3	11	3	68	1.39028e+06			578831	2.39474e+06	7.17448e+06	1.31997e+06				747611	3.93324e+06	0.525			0.361	1.648	2.238	0.684				0.483	1.443	0.747	0.391561
P09486	SPARC OS=Homo sapiens OX=9606 GN=SPARC PE=1 SV=1	SPARC	16	4	7	4	34.6		633812	236754	290803	192049	9.11842e+06	551629	174053	257904	125781	223169	8.42503e+06		0.644	0.198	0.247	0.18	3.875	0.389	0.154	0.206	0.077	0.196	4.212	0.753	0.230147
Q92734	Protein TFG OS=Homo sapiens OX=9606 GN=TFG PE=1 SV=2	TFG	2	1	1	1	43.4	858668					2.85813e+06	226460					217651
Q3LXA3	Triokinase/FMN cyclase OS=Homo sapiens OX=9606 GN=TKFC PE=1 SV=2	TKFC	2	1	1	1	58.9	475575			302579	199233		203494			308433
P25325	3-mercaptopyruvate sulfurtransferase OS=Homo sapiens OX=9606 GN=MPST PE=1 SV=3	MPST	11	3	11	3	33.2	1.81498e+06	416737		1.42468e+06	488859	1.27103e+06	515565	607636	707453	1.23682e+06	398170	277141	2.062	0.935		2.675	1.012	1.193	0.803	1.187	1.246	1.664	0.773	0.306	0.66	0.110965
P15880	40S ribosomal protein S2 OS=Homo sapiens OX=9606 GN=RPS2 PE=1 SV=2	RPS2	14	3	3	3	31.3	5.55502e+06		3.12587e+06	554997			6.77018e+06			1.51136e+06			1.5		1.369	0.248			2.507			0.483			1.809	0.0820544
P30626	Sorcin OS=Homo sapiens OX=9606 GN=SRI PE=1 SV=1	SRI	4	1	3	1	21.7	3.03969e+06		847881	830214	912984	1.0613e+06	988570	1.03678e+06		1392287		586714
P0DJD7	Pepsin A-4 OS=Homo sapiens OX=9606 GN=PGA4 PE=1 SV=1	PGA4	2	1	37	1	42	8.41145e+07	8.49047e+07	5.78419e+07	1.58113e+08	2.36794e+07	6.19231e+07	5.3869e+07	8.57066e+07	5.7668e+07	2.09335e+08	2.39432e+07	6.18038e+07
Q9NRX4	14 kDa phosphohistidine phosphatase OS=Homo sapiens OX=9606 GN=PHPT1 PE=1 SV=1	PHPT1	17	2	22	2	13.8	1.19653e+06	340843	624133	2.99126e+06	84326.8	1.44227e+06	825814	738665	921877	748836	73826	3.08983e+06	1.038	0.584	0.879	4.291	0.133	1.034	0.983	1.103	1.24	0.77	0.11	2.607	1.296	0.980947
P04843	Dolichyl-diphosphooligosaccharide--protein glycosyltransferase subunit 1 OS=Homo sapiens OX=9606 GN=RPN1 PE=1 SV=1	RPN1	4	2	8	2	68.5	5.73686e+06	703132	4.91378e+06	584612	478148	3.37529e+06	255082	1.8867e+06	7.36984e+06	643024	3.91799e+06	990838	2.11	0.511	2.933	0.355	0.321	1.026	0.129	1.194	4.203	0.28	2.464	0.354	2.107	0.843332
P08579	U2 small nuclear ribonucleoprotein B'' OS=Homo sapiens OX=9606 GN=SNRPB2 PE=1 SV=1	SNRPB2	8	2	2	2	25.5	2.48955e+06			75849.7						126023			2.625			0.132						0.157			1.189
Q9Y5B9	FACT complex subunit SPT16 OS=Homo sapiens OX=9606 GN=SUPT16H PE=1 SV=1	SUPT16H	1	1	1	1	119.8	1.07866e+06	571140	648352	698273			915302	712548	662235	474655	613866
P01033	Metalloproteinase inhibitor 1 OS=Homo sapiens OX=9606 GN=TIMP1 PE=1 SV=1	TIMP1	35	5	38	5	23.2	1.85545e+07	7.62636e+06	3.09703e+07		1.83321e+07	1.15192e+08	1.35867e+07	1.6509e+07	3.72233e+07	5117439	2.64981e+07	1.41788e+08	0.448	0.363	1.212		0.806	2.296	0.449	0.685	1.392	0.146	1.093	3.324	1.368	0.0542895
P15090	Fatty acid-binding protein, adipocyte OS=Homo sapiens OX=9606 GN=FABP4 PE=1 SV=3	FABP4	73	14	200	13	14.7	1.19788e+08	1.32422e+08	1.4926e+08	1.75156e+07	1.01485e+08	1.35742e+09	1.34415e+08	1.06982e+08	1.33725e+08	3.48969e+07	1.2416e+08	1.04411e+09	0.393	0.859	0.795	0.095	0.607	3.684	0.606	0.604	0.681	0.136	0.697	3.333	1.098	0.686889
P12104	Fatty acid-binding protein, intestinal OS=Homo sapiens OX=9606 GN=FABP2 PE=1 SV=2	FABP2	14	2	16	2	15.2	4.47247e+06	8.41886e+06	1.6573e+06	1.17533e+06	1.83184e+06	7.93256e+06	1.94601e+06	5.5383e+06	2.93423e+06	4.12687e+06	3.1075e+06	6.45074e+06	1.024	3.805	0.615	0.445	0.764	1.5	0.611	2.18	1.041	1.119	1.216	1.435	1.321	0.613143
P06744	Glucose-6-phosphate isomerase OS=Homo sapiens OX=9606 GN=GPI PE=1 SV=4	GPI	11	7	22	7	63.1	2.3808e+07	1.24198e+06	3.14534e+06	1.89653e+06	1.45109e+06	1.01326e+06	2.07523e+06	1.94336e+06	5.04037e+06	7.23434e+06	2.49555e+06	2.23152e+06	5.044	0.52	1.081	0.664	0.56	0.177	0.603	0.708	1.655	1.816	0.904	0.46	1.66	0.727298
P16104	Histone H2AX OS=Homo sapiens OX=9606 GN=H2AX PE=1 SV=2	H2AX	36	6	50	1	15.1	4.4233e+08	1.38101e+06	2.47362e+07	2.68213e+06	5.31076e+06	1.07623e+07	1.177e+07	2.75335e+06	2.10419e+07	2.01447e+08	5.50151e+06	1.54496e+07
Q14520	Hyaluronan-binding protein 2 OS=Homo sapiens OX=9606 GN=HABP2 PE=1 SV=1	HABP2	27	12	111	12	62.6	5.67136e+07	3.28624e+06	4.72387e+07	3.92955e+07	1.48018e+08	6.44651e+07	1.11512e+08	9.47092e+06	4.55177e+07	5.27064e+07	1.39742e+08	8.36463e+07	0.803	0.092	1.085	0.92	3.82	0.754	2.166	0.231	0.999	0.884	3.383	1.151	1.584	0.155443
P49773	Histidine triad nucleotide-binding protein 1 OS=Homo sapiens OX=9606 GN=HINT1 PE=1 SV=2	HINT1	23	2	8	2	13.8	856458		776346			2.70516e+06	478244			644159	250446	1.66373e+06	0.769		1.131			2.007	0.589			0.685	0.384	1.452	0.745	0.0613128
P08779	Keratin, type I cytoskeletal 16 OS=Homo sapiens OX=9606 GN=KRT16 PE=1 SV=4	KRT16	33	18	107	8	51.2	5.19521e+06	4.82861e+06	3.93306e+06	4.31835e+06	3.40365e+06	1.26992e+07	3.49298e+06	6.02109e+06	1.46556e+07	5.43026e+07	2.12668e+06	9.41519e+06	0.474	0.87	0.582	0.651	0.566	0.957	0.437	0.945	2.073	5.87	0.332	0.835	2.674	0.32368
A0A0C4DH73	Immunoglobulin kappa variable 1-12 OS=Homo sapiens OX=9606 GN=IGKV1-12 PE=3 SV=1	IGKV1-12	44	14	353	3	12.6	5.16215e+07	1.96714e+07	1.93515e+07	1.99906e+07	3.67871e+07	8.24169e+07	6.68163e+07	2.57177e+07	2.9578e+07	3.4975e+07	5.28571e+07	7.71512e+07	1.133	0.853	0.689	0.725	1.472	1.495	2.012	0.971	1.007	0.91	1.984	1.647	1.347	0.010885
Q86VZ4	Low-density lipoprotein receptor-related protein 11 OS=Homo sapiens OX=9606 GN=LRP11 PE=2 SV=2	LRP11	4	1	2	1	53.3	1.57824e+06	1.65006e+06	2.62543e+06	1.62244e+06	1.6951e+06	1.00505e+06	1.7182e+06	1.57726e+06	1.65621e+06	1.48933e+06
P01700	Immunoglobulin lambda variable 1-47 OS=Homo sapiens OX=9606 GN=IGLV1-47 PE=1 SV=2	IGLV1-47	64	14	276	2	12.3	4.42285e+08	1.20173e+08	8.57655e+07	1.87621e+08	8.63876e+07	7.63413e+08	4.63206e+08	2.22424e+08	7.90631e+07	1.89724e+08	3.55734e+08	5.48053e+08	1.417	0.76	0.446	0.993	0.504	2.02	2.035	1.225	0.393	0.72	1.948	1.706	1.561	0.347346
Q13228	Methanethiol oxidase OS=Homo sapiens OX=9606 GN=SELENBP1 PE=1 SV=2	SELENBP1	11	5	19	5	52.4	3.58957e+06	1.40505e+06	4.83511e+06	4.58206e+06	365360	1.23051e+07	1.94273e+06	2.85968e+06	2.25818e+06	1.61625e+06	409778	7.34327e+06	0.936	0.724	2.047	1.975	0.174	2.652	0.695	1.283	0.913	0.499	0.183	1.862	0.828	0.238106
O00391	Sulfhydryl oxidase 1 OS=Homo sapiens OX=9606 GN=QSOX1 PE=1 SV=3	QSOX1	28	17	130	17	82.5	1.97141e+07	1.13332e+07	1.89952e+07	2.45787e+07	3.99557e+07	7.81735e+07	3.06936e+07	1.94513e+07	3.33687e+07	4.31504e+07	5.52713e+07	7.31168e+07	0.5	0.567	0.781	1.03	1.846	1.637	1.067	0.848	1.311	1.296	2.395	1.801	1.494	0.0113607
P27708	CAD protein OS=Homo sapiens OX=9606 GN=CAD PE=1 SV=3	CAD	0	1	1	1	242.8
Q93091	Ribonuclease K6 OS=Homo sapiens OX=9606 GN=RNASE6 PE=1 SV=2	RNASE6	41	4	23	4	17.2	598279	274888	1.19131e+06	1.77425e+06	1.1877e+06	8.52576e+07	2.31175e+06	2.13249e+06	863405	540365	2.56687e+06	4.59597e+07	0.047	0.043	0.152	0.23	0.17	5.528	0.249	0.288	0.105	0.05	0.344	3.505	2.594	0.582992
Q9NQC3	Reticulon-4 OS=Homo sapiens OX=9606 GN=RTN4 PE=1 SV=2	RTN4	1	1	1	1	129.9	1.66626e+06
O75396	Vesicle-trafficking protein SEC22b OS=Homo sapiens OX=9606 GN=SEC22B PE=1 SV=4	SEC22B	5	1	1	1	24.6
Q9BV57	1,2-dihydroxy-3-keto-5-methylthiopentene dioxygenase OS=Homo sapiens OX=9606 GN=ADI1 PE=1 SV=1	ADI1	16	2	4	2	21.5	598326					1.08731e+06						1.17567e+06	0.593					0.891						1.133	1.272
Q9UHG2	ProSAAS OS=Homo sapiens OX=9606 GN=PCSK1N PE=1 SV=1	PCSK1N	13	3	12	2	27.4				195320		5.74772e+06	787972					4.59527e+06				0.108		1.586	0.361					1.492	0.941
P19174	1-phosphatidylinositol 4,5-bisphosphate phosphodiesterase gamma-1 OS=Homo sapiens OX=9606 GN=PLCG1 PE=1 SV=1	PLCG1	1	1	1	1	148.4						665889						581897
P68366	Tubulin alpha-4A chain OS=Homo sapiens OX=9606 GN=TUBA4A PE=1 SV=1	TUBA4A	30	12	26	2	49.9	9.62726e+07	1.00993e+07	5.33302e+06	9.76332e+06	5.23304e+06	7.42164e+06	2.52116e+06	1.01716e+07	8.6161e+06	1.53712e+07	5.81231e+06	3.95703e+06	6.052	1.254	0.544	1.014	0.6	0.385	0.217	1.1	0.84	1.145	0.625	0.242	0.876	0.373625
Q07654	Trefoil factor 3 OS=Homo sapiens OX=9606 GN=TFF3 PE=1 SV=2	TFF3	24	3	15	3	10.2	1.00798e+07	707558	591091	1.11818e+06	1.57043e+06	4.10975e+06	2.1494e+06	415384	1.23341e+06	2.78586e+06	1.77294e+06	2.08874e+06	3.997	0.554	0.38	0.733	1.135	1.347	1.169	0.283	0.758	1.309	1.202	0.805	1.04	0.581612
P27169	Serum paraoxonase/arylesterase 1 OS=Homo sapiens OX=9606 GN=PON1 PE=1 SV=3	PON1	26	8	69	8	39.7	1.89627e+07	2.81335e+07	2.77338e+07	2.44881e+07	3.56889e+07	1.86051e+07	3.79195e+07	3.81958e+07	3.24169e+07	2.51022e+07	6.80512e+07	2.83687e+07	0.561	1.644	1.331	1.197	1.924	0.455	1.539	1.944	1.487	0.88	3.442	0.816	1.56	0.116232
P36578	60S ribosomal protein L4 OS=Homo sapiens OX=9606 GN=RPL4 PE=1 SV=5	RPL4	9	4	5	4	47.7	8.26918e+06	2.00006e+06		382582	111941	108132	159410	2.89001e+06		817146		76921.9	4.751	2.269		0.363	0.117	0.051	0.126	2.856		0.556		0.043	0.915	0.471253
P62241	40S ribosomal protein S8 OS=Homo sapiens OX=9606 GN=RPS8 PE=1 SV=2	RPS8	7	2	3	2	24.2	1.69911e+06	276727			502012		369282	281047		377975	956062	304040	2.698	0.868			1.453		0.804	0.768		0.711	2.595	0.469	0.99	0.677436
O75915	PRA1 family protein 3 OS=Homo sapiens OX=9606 GN=ARL6IP5 PE=1 SV=1	ARL6IP5	10	1	1	1	21.6	356263											2.03173e+06
P00441	Superoxide dismutase [Cu-Zn] OS=Homo sapiens OX=9606 GN=SOD1 PE=1 SV=2	SOD1	44	3	6	3	15.9	1.63338e+07	1.27454e+06					1.36004e+06						2.444	0.377					0.279						0.114
O00204	Sulfotransferase 2B1 OS=Homo sapiens OX=9606 GN=SULT2B1 PE=1 SV=2	SULT2B1	7	3	3	3	41.3						733502				6586397		944505						0.208				2.679		0.315	1.514
P18077	60S ribosomal protein L35a OS=Homo sapiens OX=9606 GN=RPL35A PE=1 SV=2	RPL35A	19	2	2	2	12.5	850866									142804			1.62									0.322
P46783	40S ribosomal protein S10 OS=Homo sapiens OX=9606 GN=RPS10 PE=1 SV=1	RPS10	13	2	2	2	18.9	5.87632e+06				841917	193672	1.48808e+06	982593		1.72038e+06	1.27104e+06	1.42938e+06	3.221				0.841	0.088	1.119	0.927		1.117	1.191	0.762	3.474	0.655467
P62328	Thymosin beta-4 OS=Homo sapiens OX=9606 GN=TMSB4X PE=1 SV=2	TMSB4X	27	1	1	1	5.1	2.26249e+07		3.34112e+06			2.51353e+06				1324944		1.40187e+06
Q7Z7H5	Transmembrane emp24 domain-containing protein 4 OS=Homo sapiens OX=9606 GN=TMED4 PE=1 SV=1	TMED4	28	5	11	4	25.9	2.85916e+07				1.85661e+06	1.26438e+07	255472					1.3953e+06	3.022				0.358	1.104	0.037					0.143	0.071	0.223314
O00264	Membrane-associated progesterone receptor component 1 OS=Homo sapiens OX=9606 GN=PGRMC1 PE=1 SV=3	PGRMC1	26	4	24	4	21.7	502870		1.71687e+06	255822	279761	1.90746e+07	2.98128e+06			899260	1.06382e+06	1.95421e+07	0.092		0.512	0.078	0.094	2.897	0.752			0.196	0.334	3.491	3.861	0.0669386
P62081	40S ribosomal protein S7 OS=Homo sapiens OX=9606 GN=RPS7 PE=1 SV=1	RPS7	20	3	4	3	22.1	3.35826e+06									1.17385e+06			1.402									0.58
P62857	40S ribosomal protein S28 OS=Homo sapiens OX=9606 GN=RPS28 PE=1 SV=1	RPS28	17	1	1	1	7.8	1.98018e+06					3.60912e+06						1.92853e+06
P78324	Tyrosine-protein phosphatase non-receptor type substrate 1 OS=Homo sapiens OX=9606 GN=SIRPA PE=1 SV=2	SIRPA	19	9	50	6	54.9	7.96651e+06	6.91999e+06	5.68308e+06	1.63702e+07	5.39157e+06	2.34516e+07	3.80045e+06	5.7613e+06	4.60002e+06	1.30425e+07	5.75877e+06	1.35789e+07	0.805	1.381	0.932	2.734	0.993	1.958	0.527	1.001	0.721	1.561	0.995	1.334	0.735	0.00864708
Q9H3N1	Thioredoxin-related transmembrane protein 1 OS=Homo sapiens OX=9606 GN=TMX1 PE=1 SV=1	TMX1	4	1	1	1	31.8	1.30515e+06
P20742	Pregnancy zone protein OS=Homo sapiens OX=9606 GN=PZP PE=1 SV=4	PZP	21	26	134	18	163.8	8.57491e+07	1.20308e+07	1.45532e+06	2.86306e+07	1.43819e+07	1.65864e+07	4.87075e+07	5.07036e+06	1.69704e+06	3.19122e+07	6.01569e+06	1.31603e+07	3.667	1.016	0.101	2.024	1.121	0.586	2.857	0.373	0.113	1.617	0.44	0.547	0.732	0.0914055
Q02878	60S ribosomal protein L6 OS=Homo sapiens OX=9606 GN=RPL6 PE=1 SV=3	RPL6	24	7	8	7	32.7	1.59656e+07		369225		882138		3.25206e+06	54817.6		2.91563e+06	87963.8		4.493		0.169		0.452		1.255	0.027		0.972	0.042		0.186	0.18638
P18124	60S ribosomal protein L7 OS=Homo sapiens OX=9606 GN=RPL7 PE=1 SV=1	RPL7	12	3	3	3	29.2	1.34639e+07	9.3914e+06	1.18118e+07	1.24239e+07	8.90618e+06	7.5946e+06	9.7616e+06	1.2904e+07	1.70448e+07	19991466	1.45869e+07	1.03464e+07	1.031	1.42	1.468	1.572	1.243	0.481	1.025	1.7	2.023	1.813	1.91	0.77	1.31	0.0186503
Q9BUD6	Spondin-2 OS=Homo sapiens OX=9606 GN=SPON2 PE=1 SV=3	SPON2	34	7	22	7	35.8	1.38754e+07		4.32806e+06			6.57578e+07	7.32336e+06	1.81612e+06	7.99931e+06		2.61597e+06	4.45213e+07	0.708		0.358			2.774	0.513	0.159	0.633		0.228	2.209	1.096	0.983326
P62701	40S ribosomal protein S4, X isoform OS=Homo sapiens OX=9606 GN=RPS4X PE=1 SV=2	RPS4X	14	4	5	4	29.6	2.20243e+07	6.13224e+06	2.38919e+06	1.13185e+07	3.60318e+06	8.67431e+06	2.23844e+06	4.5838e+06	2.52479e+06	1.67038e+07	4.80012e+06	6.8776e+06	2.721	1.496	0.479	2.311	0.811	0.886	0.379	0.974	0.484	2.445	1.014	0.826	0.84	0.325518
P22531	Small proline-rich protein 2E OS=Homo sapiens OX=9606 GN=SPRR2E PE=2 SV=2	SPRR2E	61	3	5	1	7.9										2.95376e+06
Q9H1E3	Nuclear ubiquitous casein and cyclin-dependent kinase substrate 1 OS=Homo sapiens OX=9606 GN=NUCKS1 PE=1 SV=1	NUCKS1	11	2	2	2	27.3
Q96G03	Phosphoglucomutase-2 OS=Homo sapiens OX=9606 GN=PGM2 PE=1 SV=4	PGM2	4	2	2	2	68.2	783306			356587	63150.6	1.33615e+06	745865	94472.7	280414	1.35545e+06	90847	1.29496e+06	1.157			0.871	0.17	1.631	1.512	0.24	0.642	2.373	0.23	1.86	1.631	0.117688
Q6UWP8	Suprabasin OS=Homo sapiens OX=9606 GN=SBSN PE=1 SV=2	SBSN	31	12	69	12	60.5	1.38541e+07	2.13608e+06	4.9206e+06	3.92912e+06	1.89361e+06	7.14015e+07	7.70551e+06	1.23005e+06	4.45746e+06	4.01272e+06	5.16646e+06	4.7532e+07	0.935	0.285	0.539	0.438	0.233	3.98	0.713	0.143	0.466	0.321	0.596	3.117	1.034	0.615928
Q9HCB6	Spondin-1 OS=Homo sapiens OX=9606 GN=SPON1 PE=1 SV=2	SPON1	5	3	5	3	90.9	3.53475e+06	1.09855e+06	558209	986025	242191	2.37955e+06	1.33211e+06	1.06431e+07		24776616	1.10793e+06	3.2869e+06	0.736	0.452	0.189	0.339	0.092	0.41	0.381	3.814		6.114	0.395	0.666	6.582	0.112531
P00747	Plasminogen OS=Homo sapiens OX=9606 GN=PLG PE=1 SV=2	PLG	75	55	1271	51	90.5	1.77323e+09	8.25287e+08	2.0313e+09	1.92011e+09	3.23775e+09	1.86965e+09	2.84532e+09	1.62075e+09	1.49573e+09	1.59171e+09	2.90327e+09	2.16163e+09	0.829	0.762	1.541	1.484	2.759	0.722	1.825	1.304	1.084	0.882	2.321	0.982	1.235	0.665536
P17980	26S proteasome regulatory subunit 6A OS=Homo sapiens OX=9606 GN=PSMC3 PE=1 SV=3	PSMC3	8	2	2	2	49.2	1.72357e+06	3.25037e+06	4.22361e+06	6.01885e+06	3.1439e+06	3.4701e+06	1.49089e+06	3.93145e+06		3.71285e+06	2.6606e+06	3.65074e+06	0.481	1.792	1.913	2.776	1.599	0.8	0.571	1.888		1.228	1.27	0.99	0.943	0.556165
P07919	Cytochrome b-c1 complex subunit 6, mitochondrial OS=Homo sapiens OX=9606 GN=UQCRH PE=1 SV=2	UQCRH	29	2	2	2	10.7	2.57418e+06												0.946
P50914	60S ribosomal protein L14 OS=Homo sapiens OX=9606 GN=RPL14 PE=1 SV=4	RPL14	20	4	5	4	23.4	1.13219e+07		593085		10550.9	902622	541630		9532.2	1.83975e+06	345586	1.10177e+06	5.783		0.492		0.01	0.381	0.379		0.008	1.113	0.302	0.547	7.929	0.67797
P37802	Transgelin-2 OS=Homo sapiens OX=9606 GN=TAGLN2 PE=1 SV=3	TAGLN2	61	10	33	10	22.4	2.71337e+07	421069	6.00107e+06	779320	8.58324e+06	6.03321e+07	1.12464e+06	2.17242e+06	2.15731e+06	7.63629e+06	4.8407e+06	5.18743e+07	1.78	0.055	0.639	0.084	1.026	3.27	0.101	0.245	0.219	0.593	0.543	3.307	2.242	0.806762
Q9Y230	RuvB-like 2 OS=Homo sapiens OX=9606 GN=RUVBL2 PE=1 SV=3	RUVBL2	3	1	1	1	51.1
A1L4H1	Soluble scavenger receptor cysteine-rich domain-containing protein SSC5D OS=Homo sapiens OX=9606 GN=SSC5D PE=1 SV=3	SSC5D	4	3	6	3	165.6	2.29085e+06	2.44962e+06		7.17456e+06	57631.6	9.98726e+06	2.73959e+06	2.30905e+06		1.64305e+06	2.68864e+06	8.13226e+06	0.549	1.159		2.841	0.025	1.977	0.901	0.952		0.466	1.102	1.894	9.533	0.65225
Q66K66	Transmembrane protein 198 OS=Homo sapiens OX=9606 GN=TMEM198 PE=1 SV=1	TMEM198	3	1	261	1	39.4	8.54043e+08	8.36102e+08	1.01447e+09	9.38185e+08	4.58149e+08	4.8906e+08	8.41077e+08	1.3672e+09	1.24688e+09	1.02501e+09	6.67515e+08	5.00287e+08
O60635	Tetraspanin-1 OS=Homo sapiens OX=9606 GN=TSPAN1 PE=1 SV=2	TSPAN1	5	1	1	1	26.3
Q6EMK4	Vasorin OS=Homo sapiens OX=9606 GN=VASN PE=1 SV=1	VASN	12	6	91	6	71.7	2.17756e+07	1.98121e+07	1.50232e+07	7.58392e+07	1.58825e+07	2.79982e+07	1.55286e+07	2.79107e+07	1.62433e+07	69166940	1.43392e+07	2.01002e+07	0.728	1.308	0.815	4.189	0.967	0.773	0.712	1.605	0.842	2.738	0.819	0.653	0.931	0.347803
Q96PD5	N-acetylmuramoyl-L-alanine amidase OS=Homo sapiens OX=9606 GN=PGLYRP2 PE=1 SV=1	PGLYRP2	47	20	361	17	62.2	1.67197e+08	3.79156e+08	3.66564e+08	3.21729e+08	3.01866e+08	2.89972e+08	3.38154e+08	4.30446e+08	3.00254e+08	3.54576e+08	3.71974e+08	2.97701e+08	0.484	2.168	1.722	1.54	1.593	0.694	1.343	2.144	1.348	1.216	1.842	0.838	1.283	0.484955
P24158	Myeloblastin OS=Homo sapiens OX=9606 GN=PRTN3 PE=1 SV=3	PRTN3	33	8	25	8	27.8	4.72421e+06	5.03879e+06	8.17437e+06	5.92224e+06	2.98369e+06	1.22503e+07	6.12458e+06	5.37232e+06	1.21113e+07	3.65695e+07	3.08432e+06	2.82818e+07	0.41	0.865	1.152	0.85	0.472	0.879	0.73	0.803	1.631	3.764	0.458	2.388	2.04	0.0771322
P05388	60S acidic ribosomal protein P0 OS=Homo sapiens OX=9606 GN=RPLP0 PE=1 SV=1	RPLP0	12	4	6	4	34.3	4.61548e+06								1.01701e+06		430408		2.16								0.738		0.344
Q6XPR3	Repetin OS=Homo sapiens OX=9606 GN=RPTN PE=1 SV=1	RPTN	2	1	1	1	90.7
P62269	40S ribosomal protein S18 OS=Homo sapiens OX=9606 GN=RPS18 PE=1 SV=3	RPS18	20	3	3	3	17.7	400580				137201		152780						1.646				1.028		0.861						0.523
P22528	Cornifin-B OS=Homo sapiens OX=9606 GN=SPRR1B PE=1 SV=2	SPRR1B	34	2	2	2	9.9				103312	2.82156e+06	4.18408e+06				4.0042e+06	1.98424e+06	2.45186e+06				0.062	1.877	1.262				1.731	1.238	0.87	9.756	0.565389
Q99757	Thioredoxin, mitochondrial OS=Homo sapiens OX=9606 GN=TXN2 PE=1 SV=2	TXN2	9	1	8	1	18.4	2.72577e+06					2.28608e+06	2.37596e+06	2.75646e+06				1.44556e+06
P62937	Peptidyl-prolyl cis-trans isomerase A OS=Homo sapiens OX=9606 GN=PPIA PE=1 SV=2	PPIA	64	13	104	13	18	1.02564e+08	2.74052e+07	4.39344e+07	2.53737e+07	3.26175e+07	2.40194e+08	6.16726e+07	3.88621e+07	3.11314e+07	6.04615e+07	3.49549e+07	2.12621e+08	1.277	0.674	0.887	0.522	0.74	2.471	1.053	0.832	0.601	0.892	0.744	2.573	1.082	0.799821
O94906	Pre-mRNA-processing factor 6 OS=Homo sapiens OX=9606 GN=PRPF6 PE=1 SV=1	PRPF6	2	1	1	1	106.9
Q6NVV1	Putative 60S ribosomal protein L13a protein RPL13AP3 OS=Homo sapiens OX=9606 GN=RPL13AP3 PE=5 SV=1	RPL13AP3	11	1	1	1	12.1	2.90784e+06		905283	956726		594696	1.39369e+06		1.4578e+06			696036
P37108	Signal recognition particle 14 kDa protein OS=Homo sapiens OX=9606 GN=SRP14 PE=1 SV=2	SRP14	24	3	3	3	14.6	4.29226e+06					1.36076e+06						1.48996e+06	1.705					0.447						0.575	1.286
P02787	Serotransferrin OS=Homo sapiens OX=9606 GN=TF PE=1 SV=3	TF	82	138	14714	113	77	4.98184e+10	5.44461e+10	5.33098e+10	6.84348e+10	4.14154e+10	2.50144e+10	6.11275e+10	6.61789e+10	5.31203e+10	7.47791e+10	4.94679e+10	3.36655e+10	0.896	1.935	1.557	2.035	1.358	0.372	1.509	2.048	1.482	1.594	1.522	0.589	1.197	0.290098
Q99569	Plakophilin-4 OS=Homo sapiens OX=9606 GN=PKP4 PE=1 SV=2	PKP4	1	1	2	1	131.8	1.47341e+06	3.94421e+06		5.47325e+06		1.67276e+06		4.59896e+06			3.64435e+06	1.58702e+06
P05060	Secretogranin-1 OS=Homo sapiens OX=9606 GN=CHGB PE=1 SV=2	CHGB	14	8	49	8	78.2	6.70682e+06	1.23578e+06	9.5986e+06	302370	874886	2.841e+07	1.04287e+07	892629	8.8325e+06	1.9766e+06	1.84215e+06	3.29113e+07	0.732	0.266	1.7	0.055	0.174	2.562	1.561	0.168	1.494	0.256	0.344	3.491	1.94	0.181122
Q9UBG0	C-type mannose receptor 2 OS=Homo sapiens OX=9606 GN=MRC2 PE=1 SV=2	MRC2	1	1	1	1	166.6						354873				706332		381925
P36955	Pigment epithelium-derived factor OS=Homo sapiens OX=9606 GN=SERPINF1 PE=1 SV=4	SERPINF1	60	24	637	24	46.3	6.06121e+08	7.76996e+08	1.11789e+09	6.12886e+08	1.45268e+09	4.53205e+09	1.17245e+09	8.38971e+08	7.37147e+08	1.23808e+09	1.46922e+09	5.00863e+09	0.352	0.89	1.052	0.588	1.536	2.173	0.933	0.837	0.663	0.851	1.457	2.825	1.32	0.429196
O95969	Secretoglobin family 1D member 2 OS=Homo sapiens OX=9606 GN=SCGB1D2 PE=2 SV=1	SCGB1D2	10	1	5	1	9.9	64073.1	160050	162554	477810	87794.8		100357	213541	96825.6	1.11255e+06		162052
P27105	Stomatin OS=Homo sapiens OX=9606 GN=STOM PE=1 SV=3	STOM	18	5	16	5	31.7	1.068e+07	170616	175927	3.12839e+06	1.8489e+06	1.81115e+06	2.70173e+06	154215	708315	3.55301e+06	1.638e+06	344521	4.504	0.142	0.12	2.18	1.421	0.631	1.563	0.112	0.463	1.775	1.181	0.141	1.144	0.477429
P49368	T-complex protein 1 subunit gamma OS=Homo sapiens OX=9606 GN=CCT3 PE=1 SV=4	CCT3	4	2	2	2	60.5	1.0319e+06												0.946
P78527	DNA-dependent protein kinase catalytic subunit OS=Homo sapiens OX=9606 GN=PRKDC PE=1 SV=3	PRKDC	2	9	16	9	468.8	1.43288e+07	1.14406e+07	9.71336e+06	1.17682e+07	9.8315e+06	1.04889e+06	6.20188e+06	1.31425e+06	1.05459e+07	2.31728e+06	6.80733e+06	4.27349e+06	1.815	2.862	1.997	2.464	2.27	0.11	1.078	0.286	2.071	0.348	1.475	0.526	1.217	0.342041
P31930	Cytochrome b-c1 complex subunit 1, mitochondrial OS=Homo sapiens OX=9606 GN=UQCRC1 PE=1 SV=3	UQCRC1	4	1	1	1	52.6
O15389	Sialic acid-binding Ig-like lectin 5 OS=Homo sapiens OX=9606 GN=SIGLEC5 PE=1 SV=1	SIGLEC5	10	4	9	4	60.7		524202	643383	625551	1.76205e+06	6.72516e+06	232017	632131	877423	778530	1.89805e+06	3.68128e+06		0.586	0.591	0.585	1.818	3.146	0.18	0.616	0.77	0.522	1.837	2.026	0.98	0.712797
Q8TAQ2	SWI/SNF complex subunit SMARCC2 OS=Homo sapiens OX=9606 GN=SMARCC2 PE=1 SV=1	SMARCC2	1	1	1	1	132.8	663378		235583			620628	389368				408171
P67936	Tropomyosin alpha-4 chain OS=Homo sapiens OX=9606 GN=TPM4 PE=1 SV=3	TPM4	38	9	21	3	28.5	9.49494e+06												0.946
Q9BVK6	Transmembrane emp24 domain-containing protein 9 OS=Homo sapiens OX=9606 GN=TMED9 PE=1 SV=2	TMED9	7	2	19	1	27.3	2.65017e+06	4.32398e+06	2.89996e+07	3.20035e+06	5.35433e+06	8.51488e+06	7.76637e+06	4.63915e+06	5.81809e+06	6.04792e+06	7.73137e+06	7.83952e+06
P54727	UV excision repair protein RAD23 homolog B OS=Homo sapiens OX=9606 GN=RAD23B PE=1 SV=1	RAD23B	13	7	33	5	43.1	1.01778e+07	7.31032e+06	4.64446e+06	473589	5.31471e+06	2.57353e+07	8.44406e+06	3.82404e+06	3.1295e+06	7.48006e+06	2.06484e+06	9.91738e+06	1.305	1.851	0.966	0.1	1.242	2.727	1.485	0.843	0.622	1.136	0.453	1.236	2.403	0.888342
P61086	Ubiquitin-conjugating enzyme E2 K OS=Homo sapiens OX=9606 GN=UBE2K PE=1 SV=3	UBE2K	28	4	9	4	22.4	3.68546e+06	787289	2.01518e+06	3.41148e+06	3.31509e+06	8.36753e+06	3.65393e+06	2.15358e+06	635945	2.34686e+06	1.13142e+07	6.99976e+06	0.859	0.362	0.762	1.314	1.409	1.612	1.169	0.864	0.23	0.648	4.51	1.586	1.455	0.85731
A0A1B0GUS4	Ubiquitin-conjugating enzyme E2 L5 OS=Homo sapiens OX=9606 GN=UBE2L5 PE=2 SV=1	UBE2L5	14	1	2	1	17.9
Q7Z5L0	Vitelline membrane outer layer protein 1 homolog OS=Homo sapiens OX=9606 GN=VMO1 PE=1 SV=1	VMO1	37	4	20	4	21.5	1.9425e+06	1.54836e+06	1.95878e+06	4.21699e+06	666978	3.38141e+06	1.08163e+06	869165	1.39976e+06	2.69486e+06	376643	2.20258e+06	0.987	1.554	1.615	3.541	0.618	1.42	0.754	0.76	1.103	1.622	0.327	1.088	0.615	0.00293199
P04070	Vitamin K-dependent protein C OS=Homo sapiens OX=9606 GN=PROC PE=1 SV=1	PROC	15	5	18	5	52	787189	1.00121e+06	2.08564e+06	2.04017e+06	1.03047e+07	4.49789e+06	3.70156e+06	1.15139e+06	2.98092e+06	4.29086e+06	1.27069e+07	7.32935e+06	0.169	0.424	0.726	0.724	4.031	0.798	1.09	0.425	0.992	1.091	4.664	1.529	2.233	0.0958172
P22626	Heterogeneous nuclear ribonucleoproteins A2/B1 OS=Homo sapiens OX=9606 GN=HNRNPA2B1 PE=1 SV=2	HNRNPA2B1	35	10	15	8	37.4	5.91862e+07	2.66618e+06	147935	1.51212e+06	3.33168e+06	3.22099e+06	1.96758e+06	1.96657e+06	2.25788e+06	2663750	3.26306e+06	533483	8.122	0.722	0.033	0.343	0.833	0.365	0.37	0.464	0.48	0.433	0.766	0.071	2.935	0.642292
P62314	Small nuclear ribonucleoprotein Sm D1 OS=Homo sapiens OX=9606 GN=SNRPD1 PE=1 SV=1	SNRPD1	9	1	1	1	13.3	600676
Q53LP3	Ankyrin repeat domain-containing protein SOWAHC OS=Homo sapiens OX=9606 GN=SOWAHC PE=1 SV=1	SOWAHC	1	1	6	1	55.6	695711	2.52436e+06	2.24007e+06	6.41532e+06	1.24425e+06	3.97497e+06	3.4621e+06	2.85012e+06	1.21904e+06	2.15101e+06	1.63362e+06	3.45775e+06
Q8NBJ7	Inactive C-alpha-formylglycine-generating enzyme 2 OS=Homo sapiens OX=9606 GN=SUMF2 PE=1 SV=2	SUMF2	27	8	14	8	33.8					300377	8.0552e+06	638779				562552	1.08575e+07					0.127	1.542	0.203				0.223	2.445	1.671	0.0632201
O75643	U5 small nuclear ribonucleoprotein 200 kDa helicase OS=Homo sapiens OX=9606 GN=SNRNP200 PE=1 SV=2	SNRNP200	1	2	3	2	244.4	7.55786e+06		104358	41291	93816.6		6.82475e+06		110523	74139.2	132886		3.828		0.086	0.035	0.087		4.742		0.087	0.044	0.115		1.207	0.0528148
P22897	Macrophage mannose receptor 1 OS=Homo sapiens OX=9606 GN=MRC1 PE=1 SV=1	MRC1	3	5	12	5	165.9	7.57841e+06	9.07118e+06	1.05908e+07	5.09507e+06	7.82447e+06	8.99214e+06	5.76299e+06	9.53504e+06	1.26954e+07	8.93691e+06	6.90327e+06	6.89733e+06	0.861	2.036	1.953	0.957	1.621	0.844	0.898	1.864	2.236	1.203	1.341	0.762	1.015	0.949241
Q9BXP8	Pappalysin-2 OS=Homo sapiens OX=9606 GN=PAPPA2 PE=1 SV=4	PAPPA2	13	16	111	16	198.4	8.60174e+06	1.4104e+07	2.47221e+06	3.37198e+07	6.29087e+06	2.20983e+07	4.66429e+06	3.17027e+07	8.14263e+06	1.7909e+07	7.1545e+06	1.3707e+07	0.572	1.853	0.267	3.708	0.763	1.215	0.426	3.629	0.84	1.412	0.814	0.887	1.338	0.874658
P26447	Protein S100-A4 OS=Homo sapiens OX=9606 GN=S100A4 PE=1 SV=1	S100A4	38	5	10	5	11.7	226655	723107	714403	306403		1.44013e+07	1.81853e+06	347156	1.45306e+06	2.11893e+06	1.7946e+06	1.69804e+07	0.058	0.363	0.295	0.129		3.028	0.635	0.152	0.573	0.639	0.781	4.2	3.93	0.213801
P05109	Protein S100-A8 OS=Homo sapiens OX=9606 GN=S100A8 PE=1 SV=1	S100A8	57	10	100	10	10.8	6.36432e+07	1.65598e+07	5.32021e+07	3.77725e+08	6.5709e+06	9.43329e+07	3.37958e+07	2.40988e+07	8.37028e+07	1.84012e+09	2.94809e+07	1.43965e+08	0.261	0.134	0.354	2.561	0.049	0.32	0.19	0.17	0.532	8.941	0.207	0.574	2.168	0.0744222
P0DJI9	Serum amyloid A-2 protein OS=Homo sapiens OX=9606 GN=SAA2 PE=1 SV=1	SAA2	30	4	14	1	13.5					5.53628e+06
Q9UBT2	SUMO-activating enzyme subunit 2 OS=Homo sapiens OX=9606 GN=UBA2 PE=1 SV=2	UBA2	3	2	2	2	71.2	1.11835e+06				1.0801e+06						1.06541e+06		0.972				1.711						1.584		0.926
P36952	Serpin B5 OS=Homo sapiens OX=9606 GN=SERPINB5 PE=1 SV=2	SERPINB5	7	3	3	3	42.1				112973	147618	602776	451240	95233.5	1.75568e+06	3.99403e+06	294755	142765				0.209	0.301	0.558	0.694	0.184	3.05	5.302	0.565	0.155	9.174	0.578194
Q96QR1	Secretoglobin family 3A member 1 OS=Homo sapiens OX=9606 GN=SCGB3A1 PE=1 SV=2	SCGB3A1	18	1	3	1	10.1
Q9UIB8	SLAM family member 5 OS=Homo sapiens OX=9606 GN=CD84 PE=1 SV=1	CD84	6	1	2	1	38.8
P62316	Small nuclear ribonucleoprotein Sm D2 OS=Homo sapiens OX=9606 GN=SNRPD2 PE=1 SV=1	SNRPD2	16	2	2	2	13.5	5.95672e+06		893554			602071				910147			2.695		0.656			0.225				0.488
O43278	Kunitz-type protease inhibitor 1 OS=Homo sapiens OX=9606 GN=SPINT1 PE=1 SV=2	SPINT1	2	1	1	1	58.4
P41222	Prostaglandin-H2 D-isomerase OS=Homo sapiens OX=9606 GN=PTGDS PE=1 SV=1	PTGDS	64	10	1069	10	21	1.90231e+09	2.12196e+09	1.60905e+09	2.15878e+09	1.45208e+09	3.16205e+09	1.60121e+09	2.2053e+09	1.97587e+09	2.32808e+09	1.31264e+09	2.40339e+09	0.891	1.963	1.223	1.671	1.24	1.224	1.029	1.777	1.435	1.292	1.051	1.094	0.958	0.462697
P23246	Splicing factor, proline- and glutamine-rich OS=Homo sapiens OX=9606 GN=SFPQ PE=1 SV=2	SFPQ	8	5	6	4	76.1	5.71008e+06		666884		187424	1.60154e+06	1.8735e+06			1.18185e+06	948329	566343	3.393		0.643		0.203	0.786	1.527			0.832	0.963	0.327	1.87	0.965025
Q9H0U4	Ras-related protein Rab-1B OS=Homo sapiens OX=9606 GN=RAB1B PE=1 SV=1	RAB1B	33	5	6	3	22.2	4.02771e+06									986102			1.52									0.441
Q9H1E1	Ribonuclease 7 OS=Homo sapiens OX=9606 GN=RNASE7 PE=1 SV=2	RNASE7	15	2	3	2	17.4		215550	1.5177e+06	732775	208674	5.89114e+06		189052		4.3543e+07	5.52935e+06	8.43247e+06		0.055	0.316	0.156	0.049	0.625		0.042		6.627	1.215	1.053	17.431	0.165428
P28066	Proteasome subunit alpha type-5 OS=Homo sapiens OX=9606 GN=PSMA5 PE=1 SV=3	PSMA5	30	4	5	4	26.4	4.84736e+06										473211		1.724										0.288
P25787	Proteasome subunit alpha type-2 OS=Homo sapiens OX=9606 GN=PSMA2 PE=1 SV=2	PSMA2	14	2	3	2	25.9	1.3232e+06		229610				63471.2		179513	322675			2.954		0.832				0.194		0.621	0.853			0.406	0.431878
Q13200	26S proteasome non-ATPase regulatory subunit 2 OS=Homo sapiens OX=9606 GN=PSMD2 PE=1 SV=3	PSMD2	1	1	1	1	100.1	400157									154545
P13489	Ribonuclease inhibitor OS=Homo sapiens OX=9606 GN=RNH1 PE=1 SV=2	RNH1	16	6	9	6	49.9	2.04371e+06					1.81123e+06		7.50512e+06	582369	4.4573e+06		1.89718e+06	0.634					0.464		4.004	0.28	1.638		0.572	1.233
P06702	Protein S100-A9 OS=Homo sapiens OX=9606 GN=S100A9 PE=1 SV=1	S100A9	82	18	187	18	13.2	7.64019e+07	1.18493e+07	7.29697e+07	4.96403e+08	1.41532e+07	1.1674e+08	5.20496e+07	1.31999e+07	9.63803e+07	2.33193e+09	1.31448e+07	1.92936e+08	0.249	0.076	0.385	2.67	0.084	0.314	0.232	0.074	0.486	8.989	0.073	0.61	1.558	0.209317
P03973	Antileukoproteinase OS=Homo sapiens OX=9606 GN=SLPI PE=1 SV=2	SLPI	33	5	25	5	14.3	6.35993e+06		1.35228e+06	1.16597e+06	709295	9.18822e+06	1.24357e+06	529779	2.17343e+06	3.17004e+07	637746	1.47221e+07	0.948		0.327	0.287	0.193	1.132	0.254	0.136	0.502	5.599	0.163	2.134	4.808	0.508572
P51688	N-sulphoglucosamine sulphohydrolase OS=Homo sapiens OX=9606 GN=SGSH PE=1 SV=1	SGSH	9	3	3	3	56.7
Q92765	Secreted frizzled-related protein 3 OS=Homo sapiens OX=9606 GN=FRZB PE=1 SV=2	FRZB	5	1	1	1	36.2		356220		717863	1.11392e+06	252946		366772	196539	839224		569499
Q12874	Splicing factor 3A subunit 3 OS=Homo sapiens OX=9606 GN=SF3A3 PE=1 SV=1	SF3A3	3	1	1	1	58.8	690042	52035.6
P05387	60S acidic ribosomal protein P2 OS=Homo sapiens OX=9606 GN=RPLP2 PE=1 SV=1	RPLP2	30	3	4	3	11.7	6.54186e+06	182642	126479	1.92609e+06			272218		5.81529e+06	1.0031e+07			1.74	0.096	0.055	0.847			0.099		2.398	3.16			15.796	0.738856
P10153	Non-secretory ribonuclease OS=Homo sapiens OX=9606 GN=RNASE2 PE=1 SV=2	RNASE2	25	5	74	5	18.3	6.75755e+07	9.99583e+07	4.87998e+07	1.40463e+08	5.21966e+07	5.24187e+07	6.33214e+07	1.14284e+08	4.91178e+07	1.00579e+08	5.76104e+07	6.32473e+07	0.843	2.463	0.988	2.897	1.187	0.54	1.084	2.453	0.95	1.487	1.229	0.767	1.035	0.93644
P17900	Ganglioside GM2 activator OS=Homo sapiens OX=9606 GN=GM2A PE=1 SV=4	GM2A	31	8	225	8	20.8	1.60701e+08	1.20272e+08	2.73942e+08	6.52063e+08	1.49286e+08	6.4236e+08	1.82174e+08	3.03722e+08	3.13096e+08	1.83113e+08	1.85804e+08	4.36379e+08	0.506	0.748	1.4	3.395	0.857	1.672	0.787	1.646	1.529	0.683	1.001	1.336	1.169	0.868683
P50452	Serpin B8 OS=Homo sapiens OX=9606 GN=SERPINB8 PE=1 SV=2	SERPINB8	5	2	3	1	42.7
P00390	Glutathione reductase, mitochondrial OS=Homo sapiens OX=9606 GN=GSR PE=1 SV=2	GSR	12	4	12	4	56.2			826200	359384	540299	535330	683297		957956	871282					1.859	0.824	1.366	0.614	1.3		2.06	1.432			1.423	0.383068
Q9P035	Very-long-chain (3R)-3-hydroxyacyl-CoA dehydratase 3 OS=Homo sapiens OX=9606 GN=HACD3 PE=1 SV=2	HACD3	2	1	1	1	43.1
Q8WUM4	Programmed cell death 6-interacting protein OS=Homo sapiens OX=9606 GN=PDCD6IP PE=1 SV=1	PDCD6IP	7	6	10	6	96	3.59934e+06	3.8192e+06	1.39109e+06		5.32014e+06	3.14436e+06	784235	2.18443e+06	2.56733e+06	8.35179e+06	5.3087e+06	3.21017e+06	0.944	1.978	0.592		2.542	0.681	0.282	0.985	1.044	2.594	2.38	0.818	0.94	0.483966
P05164	Myeloperoxidase OS=Homo sapiens OX=9606 GN=MPO PE=1 SV=1	MPO	28	24	67	24	83.8	4.65993e+07	3.41782e+07	5.80757e+07	5.02203e+07	3.13384e+07	2.85636e+07	4.71934e+07	5.79999e+07	5.60335e+07	1.47262e+08	3.12176e+07	6.65508e+07	0.807	1.169	1.632	1.438	0.989	0.409	1.121	1.728	1.505	3.022	0.925	1.121	1.595	0.0805376
P42766	60S ribosomal protein L35 OS=Homo sapiens OX=9606 GN=RPL35 PE=1 SV=2	RPL35	14	2	3	2	14.5	9.61735e+06	4.22143e+06	700991	3.31559e+06	4.52744e+06	1.06802e+07	7.21413e+06	5.41847e+06	3.07002e+06	5.18499e+06	4.76982e+06	7.30892e+06	1.653	1.433	0.196	0.942	1.418	1.517	1.701	1.602	0.818	1.056	1.402	1.221	1.539	0.363064
P04844	Dolichyl-diphosphooligosaccharide--protein glycosyltransferase subunit 2 OS=Homo sapiens OX=9606 GN=RPN2 PE=1 SV=3	RPN2	4	1	1	1	69.2
Q15424	Scaffold attachment factor B1 OS=Homo sapiens OX=9606 GN=SAFB PE=1 SV=4	SAFB	3	1	2	1	102.6	739111
Q7KZF4	Staphylococcal nuclease domain-containing protein 1 OS=Homo sapiens OX=9606 GN=SND1 PE=1 SV=1	SND1	1	1	1	1	101.9	344052
P04179	Superoxide dismutase [Mn], mitochondrial OS=Homo sapiens OX=9606 GN=SOD2 PE=1 SV=3	SOD2	20	4	24	4	24.7	2.69544e+06	967376	1.75385e+06	1.09498e+06	523715	8.99503e+06	666294	956894	4.22828e+06	1.05115e+06	1.34787e+06	2.97272e+06	1.123	0.796	1.185	0.754	0.398	3.095	0.381	0.686	2.73	0.519	0.96	1.203	1.166	0.704297
Q9BRK3	Matrix remodeling-associated protein 8 OS=Homo sapiens OX=9606 GN=MXRA8 PE=1 SV=1	MXRA8	3	1	2	1	49.1				454563		935132				1.22726e+06		730433
P40261	Nicotinamide N-methyltransferase OS=Homo sapiens OX=9606 GN=NNMT PE=1 SV=1	NNMT	3	1	1	1	29.6	437691		458259		299415		253007			308860		429980
Q9UMX5	Neudesin OS=Homo sapiens OX=9606 GN=NENF PE=1 SV=1	NENF	38	4	16	4	18.8	505592	1.39525e+06	760547	317457	1.34414e+06	2.66121e+06	2.37669e+06	3.67599e+06	2.69361e+06	3.03013e+06	2.42884e+06	4.8078e+06	0.221	1.203	0.539	0.229	1.07	0.96	1.423	2.761	1.823	1.567	1.813	2.04	3.796	0.00442771
P07737	Profilin-1 OS=Homo sapiens OX=9606 GN=PFN1 PE=1 SV=2	PFN1	88	12	191	12	15	1.52455e+08	1.3374e+08	1.73744e+08	3.19826e+07	1.03166e+08	7.1781e+08	1.8038e+08	1.38384e+08	1.44371e+08	8.80801e+07	1.05426e+08	5.26902e+08	0.693	1.201	1.282	0.24	0.855	2.697	1.125	1.082	1.018	0.474	0.82	2.329	1.186	0.51979
P00558	Phosphoglycerate kinase 1 OS=Homo sapiens OX=9606 GN=PGK1 PE=1 SV=3	PGK1	36	14	52	14	44.6	2.82333e+07	1.74896e+06	1.35264e+07	5.02042e+06	5.57444e+06	6.22383e+06	1.41548e+06	1.20555e+06	1.09412e+07	1.50156e+07	1.48806e+06	5.72122e+06	3.334	0.408	2.592	0.98	1.2	0.607	0.229	0.245	2.003	2.101	0.3	0.657	0.82	0.236942
Q96Q06	Perilipin-4 OS=Homo sapiens OX=9606 GN=PLIN4 PE=1 SV=2	PLIN4	2	2	2	2	134.3				828309	721264	4.13432e+06	745983				1.06159e+06	1.69575e+06				0.846	0.812	2.11	0.632				1.121	1.018	0.932	0.765187
P49720	Proteasome subunit beta type-3 OS=Homo sapiens OX=9606 GN=PSMB3 PE=1 SV=2	PSMB3	9	1	2	1	22.9	625327									329724
P39019	40S ribosomal protein S19 OS=Homo sapiens OX=9606 GN=RPS19 PE=1 SV=2	RPS19	13	2	2	2	16.1	9.5895e+06												0.946
P31151	Protein S100-A7 OS=Homo sapiens OX=9606 GN=S100A7 PE=1 SV=4	S100A7	48	5	7	5	11.5	2.11268e+06	1.51815e+06		4.08076e+06	2.23994e+06	1.91986e+06	4.21775e+06	866025	1.81665e+06	5.30301e+07	1.82432e+06	17636.5	0.298	0.424		0.953	0.577	0.224	0.817	0.21	0.398	8.875	0.441	0.002	2.665	0.69814
P80511	Protein S100-A12 OS=Homo sapiens OX=9606 GN=S100A12 PE=1 SV=2	S100A12	30	2	7	2	10.6	508453	703354	4.24785e+06			1.35643e+06			6.40632e+06	10224177		3.85418e+06	0.123	0.337	1.672			0.272			2.409	2.937		0.909	2.391	0.312891
O95428	Papilin OS=Homo sapiens OX=9606 GN=PAPLN PE=2 SV=4	PAPLN	1	1	1	1	137.6
P39023	60S ribosomal protein L3 OS=Homo sapiens OX=9606 GN=RPL3 PE=1 SV=2	RPL3	12	4	5	4	46.1	3.75654e+06				147500	213586				742536	39830.6	339743	4.069				0.291	0.191				0.953	0.074	0.358	1.064	0.773857
P62249	40S ribosomal protein S16 OS=Homo sapiens OX=9606 GN=RPS16 PE=1 SV=2	RPS16	10	2	2	2	16.4	2.2081e+06												0.946
Q96FQ6	Protein S100-A16 OS=Homo sapiens OX=9606 GN=S100A16 PE=1 SV=1	S100A16	12	1	2	1	11.8	289021			1.98594e+06						12549023		293551
O00151	PDZ and LIM domain protein 1 OS=Homo sapiens OX=9606 GN=PDLIM1 PE=1 SV=4	PDLIM1	5	1	1	1	36						301950
Q15149	Plectin OS=Homo sapiens OX=9606 GN=PLEC PE=1 SV=3	PLEC	2	9	22	9	531.5	5.72968e+06	4.78615e+06	1.08284e+07	6.96642e+06	9.86231e+06	1.72395e+07	7.51762e+06	5.34325e+06	1.20657e+07	1.00892e+07	1.35983e+07	2.25902e+07	0.514	0.847	1.575	1.032	1.611	1.277	0.924	0.824	1.677	1.071	2.084	1.968	1.285	0.0745385
Q14914	Prostaglandin reductase 1 OS=Homo sapiens OX=9606 GN=PTGR1 PE=1 SV=2	PTGR1	3	1	1	1	35.8
P62491	Ras-related protein Rab-11A OS=Homo sapiens OX=9606 GN=RAB11A PE=1 SV=3	RAB11A	9	2	2	2	24.4
P62280	40S ribosomal protein S11 OS=Homo sapiens OX=9606 GN=RPS11 PE=1 SV=3	RPS11	10	2	3	2	18.4	5.60984e+06		318668			1.41974e+06	146046	390408	254972	872776		980767	4.248		0.392			0.888	0.152	0.509	0.299	0.783		0.722	0.537	0.343254
Q13835	Plakophilin-1 OS=Homo sapiens OX=9606 GN=PKP1 PE=1 SV=2	PKP1	18	9	9	9	82.8				843312						2.22544e+07		1.01942e+06				0.164						3.102		0.117	18.915
P50120	Retinol-binding protein 2 OS=Homo sapiens OX=9606 GN=RBP2 PE=1 SV=3	RBP2	17	2	10	2	15.7		309538	262242	143913		3.75418e+06	6.68065e+06	304512	4.53515e+06	5.7163e+06		4.78196e+06		0.196	0.137	0.076		0.997	2.945	0.168	2.259	2.176		1.494	11.869	0.161987
P83731	60S ribosomal protein L24 OS=Homo sapiens OX=9606 GN=RPL24 PE=1 SV=1	RPL24	6	1	1	1	17.8	461896			31042.6						11918.1
P23396	40S ribosomal protein S3 OS=Homo sapiens OX=9606 GN=RPS3 PE=1 SV=2	RPS3	22	4	5	4	26.7	1.98074e+06					87617				221628			2.454					0.09				0.325
A0A075B6I6	Probable non-functional immunoglobulin lambda variable 1-50 OS=Homo sapiens OX=9606 GN=IGLV1-50 PE=1 SV=1	IGLV1-50	58	9	92	1	12.3						2.00736e+07						6.88304e+06
Q15121	Astrocytic phosphoprotein PEA-15 OS=Homo sapiens OX=9606 GN=PEA15 PE=1 SV=2	PEA15	21	3	4	3	15		101557	316422			1.95406e+06	507461	150087		526348		1.15787e+06		0.282	0.721			2.268	0.978	0.363		0.876		1.581	0.992	0.88869
Q8IV08	5'-3' exonuclease PLD3 OS=Homo sapiens OX=9606 GN=PLD3 PE=1 SV=1	PLD3	7	3	5	3	54.7	580840		620224	642264	203949	654498		305240	277155	273061		318106	1.276		2.211	2.332	0.817	1.188		1.153	0.944	0.711		0.679	0.434	0.0412452
P07305	Histone H1.0 OS=Homo sapiens OX=9606 GN=H1-0 PE=1 SV=3	H1-0	9	2	2	2	20.9						160691				9.4867e+06								0.026				2.204
P17931	Galectin-3 OS=Homo sapiens OX=9606 GN=LGALS3 PE=1 SV=5	LGALS3	27	7	44	7	26.1	4.80894e+06	1.79062e+06	3.22535e+06	2.66312e+06	1.21993e+06	3.22665e+07	4.77843e+06	2.85014e+06	5.51663e+06	7.93311e+06	3.58883e+06	2.90736e+07	0.547	0.402	0.596	0.501	0.253	3.035	0.746	0.558	0.973	1.07	0.698	3.217	1.723	0.0170959
P01703	Immunoglobulin lambda variable 1-40 OS=Homo sapiens OX=9606 GN=IGLV1-40 PE=1 SV=2	IGLV1-40	64	11	176	2	12.3	1.15531e+08	6.4301e+07	3.56021e+07	5.05886e+07	1.55837e+08	5.50504e+08	1.05587e+08	8.96609e+07	6.0914e+07	8.28249e+07	1.26802e+08	3.32231e+08	0.741	0.814	0.37	0.536	1.821	2.916	0.929	0.989	0.605	0.629	1.39	2.07	1.125	0.582784
P41218	Myeloid cell nuclear differentiation antigen OS=Homo sapiens OX=9606 GN=MNDA PE=1 SV=1	MNDA	11	3	3	3	45.8	1.06598e+06		353135						345202	2.01421e+06		261039	1.248		0.671						0.627	2.793		0.297	0.934
Q9HC84	Mucin-5B OS=Homo sapiens OX=9606 GN=MUC5B PE=1 SV=3	MUC5B	2	11	14	11	596	1.33687e+07	6.62696e+06	1.48528e+07	1.13402e+07	5.66197e+06	1.11711e+07	1.29115e+07	5.8164e+06	1.3519e+07	1.59831e+07	3.5079e+06	1.51407e+07	1.168	1.143	2.106	1.638	0.902	0.807	1.548	0.874	1.831	1.654	0.524	1.286	1.024	0.83805
Q504Q3	PAN2-PAN3 deadenylation complex catalytic subunit PAN2 OS=Homo sapiens OX=9606 GN=PAN2 PE=1 SV=3	PAN2	1	1	1	1	135.3
P01834	Immunoglobulin kappa constant OS=Homo sapiens OX=9606 GN=IGKC PE=1 SV=2	IGKC	93	38	1662	38	11.8	6.19638e+09	3.64456e+09	3.45951e+09	3.57097e+09	5.2338e+09	8.18331e+09	6.08262e+09	3.81436e+09	3.5781e+09	4.26704e+09	4.65314e+09	6.37754e+09	1.191	1.383	1.079	1.134	1.833	1.299	1.603	1.261	1.066	0.971	1.529	1.191	0.975	0.612882
Q969P0	Immunoglobulin superfamily member 8 OS=Homo sapiens OX=9606 GN=IGSF8 PE=1 SV=1	IGSF8	11	5	47	5	65	5.10177e+07	1.87469e+07	1.90176e+07	1.21366e+07	8.17086e+06	2.44985e+07	1.97145e+07	1.56596e+07	2.49961e+07	2.04795e+07	8.46094e+06	1.5364e+07	2.43	1.764	1.47	0.956	0.709	0.964	1.288	1.283	1.846	1.156	0.689	0.711	0.905	0.337896
P01715	Immunoglobulin lambda variable 3-1 OS=Homo sapiens OX=9606 GN=IGLV3-1 PE=1 SV=2	IGLV3-1	26	3	22	1	12.3				3.47262e+06						5063971
Q5T749	Keratinocyte proline-rich protein OS=Homo sapiens OX=9606 GN=KPRP PE=1 SV=1	KPRP	5	3	5	3	64.1	1.75201e+06		933425		478513	616254	3.49149e+06		1.88228e+06	858277		831860	1.223		1.057		0.609	0.355	3.342		2.036	0.709		0.564	2.083	0.046776
P17050	Alpha-N-acetylgalactosaminidase OS=Homo sapiens OX=9606 GN=NAGA PE=1 SV=2	NAGA	8	3	13	3	46.5	5.34946e+06	1.54847e+06	4.26014e+06	9.9258e+06	1.45362e+06	3.28477e+06	1.03728e+06	3.01813e+06	3.65037e+06	752368	1.11515e+06	1.36621e+06	1.652	0.944	2.134	5.065	0.818	0.838	0.439	1.603	1.747	0.275	0.589	0.41	0.674	0.150409
P20142	Gastricsin OS=Homo sapiens OX=9606 GN=PGC PE=1 SV=1	PGC	5	2	8	2	42.4		1.39874e+07	547586	1.47669e+07			2.05821e+06	1.80775e+07	2.87741e+07	2.64553e+07				1.747	0.056	1.544			0.179	1.967	2.822	1.982			17.601	0.369963
P14780	Matrix metalloproteinase-9 OS=Homo sapiens OX=9606 GN=MMP9 PE=1 SV=3	MMP9	8	4	7	4	78.4	4.34438e+06	1.23128e+06	2.04016e+06	784382	2.3752e+06	4.10437e+06	2.11204e+06	696752	543510	4.98188e+06	1.82181e+06	4.58216e+06	1.665	0.932	1.269	0.497	1.659	1.3	1.11	0.459	0.323	2.262	1.194	1.707	1.333	0.688884
P30039	Phenazine biosynthesis-like domain-containing protein OS=Homo sapiens OX=9606 GN=PBLD PE=1 SV=2	PBLD	6	1	2	1	31.8
Q9UBD6	Ammonium transporter Rh type C OS=Homo sapiens OX=9606 GN=RHCG PE=1 SV=1	RHCG	7	2	2	2	53.1										5.80292e+06												1.12
Q5TEC6	Histone HIST2H3PS2 OS=Homo sapiens OX=9606 GN=H3-2 PE=1 SV=1	H3-2	25	4	31	1	15.4	1.99004e+06									1709633
Q86YZ3	Hornerin OS=Homo sapiens OX=9606 GN=HRNR PE=1 SV=2	HRNR	18	11	39	11	282.2	1.70046e+06	1.38848e+06	63518.2	286718	462954	17084.7	651828	447385	1.5849e+06	476545	311827	456219	2.459	3.966	0.149	0.685	1.22	0.02	1.293	1.113	3.554	0.816	0.771	0.641	9.755	0.417427
P01880	Immunoglobulin heavy constant delta OS=Homo sapiens OX=9606 GN=IGHD PE=1 SV=3	IGHD	35	10	65	10	42.3	7.26979e+07	6.6086e+07	741490	372137	5.82685e+06	6.20194e+06	1.01558e+08	3.9777e+07	792471	397656	2.25756e+06	1.54033e+06	2.767	4.966	0.046	0.023	0.404	0.195	5.302	2.604	0.047	0.018	0.147	0.057	0.817	0.20902
O43390	Heterogeneous nuclear ribonucleoprotein R OS=Homo sapiens OX=9606 GN=HNRNPR PE=1 SV=1	HNRNPR	4	2	2	1	70.9	956810
P0CF74	Immunoglobulin lambda constant 6 OS=Homo sapiens OX=9606 GN=IGLC6 PE=1 SV=1	IGLC6	58	25	1894	1	11.3
Q9H492	Microtubule-associated proteins 1A/1B light chain 3A OS=Homo sapiens OX=9606 GN=MAP1LC3A PE=1 SV=2	MAP1LC3A	6	1	1	1	14.3						430172						741654
Q9UHY7	Enolase-phosphatase E1 OS=Homo sapiens OX=9606 GN=ENOPH1 PE=1 SV=1	ENOPH1	16	3	7	3	28.9	930375	720024	943413	804134	1.01022e+06	7.61006e+06	747087	624055	319581	261254	1.11456e+06	5.18274e+06	0.521	0.796	0.857	0.744	1.031	3.522	0.574	0.601	0.277	0.173	1.067	2.821	0.708	0.12002
Q99714	3-hydroxyacyl-CoA dehydrogenase type-2 OS=Homo sapiens OX=9606 GN=HSD17B10 PE=1 SV=3	HSD17B10	9	1	1	1	26.9	560193
P01701	Immunoglobulin lambda variable 1-51 OS=Homo sapiens OX=9606 GN=IGLV1-51 PE=1 SV=2	IGLV1-51	53	11	119	7	12.2	1.31766e+08	1.52112e+08	3.77831e+07	9.95814e+07	1.85837e+08	7.02558e+08	1.67829e+08	1.48605e+08	5.10679e+07	1.10337e+08	1.55655e+08	4.28967e+08	0.631	1.437	0.293	0.788	1.621	2.778	1.102	1.223	0.379	0.625	1.273	1.995	1.031	0.868174
Q9H6R4	Nucleolar protein 6 OS=Homo sapiens OX=9606 GN=NOL6 PE=1 SV=2	NOL6	1	1	1	1	127.5
Q14982	Opioid-binding protein/cell adhesion molecule OS=Homo sapiens OX=9606 GN=OPCML PE=1 SV=1	OPCML	3	1	1	1	38
Q96S96	Phosphatidylethanolamine-binding protein 4 OS=Homo sapiens OX=9606 GN=PEBP4 PE=1 SV=3	PEBP4	44	6	124	6	25.7	2.94479e+07	6.82904e+07	3.81261e+07	4.68207e+06	4.09962e+07	4.16564e+08	5.82252e+07	7.42777e+07	3.28804e+07	1.7893e+07	5.89193e+07	4.73495e+08	0.254	1.165	0.534	0.067	0.646	2.974	0.69	1.104	0.44	0.183	0.87	3.976	1.651	0.119866
P16402	Histone H1.3 OS=Homo sapiens OX=9606 GN=H1-3 PE=1 SV=2	H1-3	23	6	21	1	22.3
P01042	Kininogen-1 OS=Homo sapiens OX=9606 GN=KNG1 PE=1 SV=2	KNG1	45	35	735	35	71.9	2.23665e+09	1.76733e+09	1.78326e+09	2.19824e+09	3.39436e+09	3.77284e+09	2.16626e+09	1.78295e+09	1.40914e+09	2.89023e+09	3.26683e+09	3.63856e+09	0.838	1.307	1.084	1.361	2.317	1.168	1.113	1.149	0.818	1.282	2.092	1.325	0.99	0.754801
P42704	Leucine-rich PPR motif-containing protein, mitochondrial OS=Homo sapiens OX=9606 GN=LRPPRC PE=1 SV=3	LRPPRC	2	2	2	2	157.8
O75594	Peptidoglycan recognition protein 1 OS=Homo sapiens OX=9606 GN=PGLYRP1 PE=1 SV=1	PGLYRP1	53	7	86	7	21.7	2.12458e+08	1.3338e+08	1.5212e+08	2.36768e+08	5.92844e+07	2.62785e+08	1.24435e+08	2.09061e+08	2.11417e+08	1.93248e+08	9.66547e+07	1.94937e+08	1.156	1.433	1.343	2.129	0.588	1.181	0.929	1.956	1.783	1.245	0.899	1.031	1.08	0.894931
P01619	Immunoglobulin kappa variable 3-20 OS=Homo sapiens OX=9606 GN=IGKV3-20 PE=1 SV=2	IGKV3-20	62	25	966	17	12.5	2.3018e+09	1.40241e+09	1.3823e+09	1.07765e+09	1.81316e+09	4.85045e+09	2.55634e+09	1.57797e+09	1.55954e+09	1.49899e+09	1.81217e+09	3.04853e+09	1.05	1.263	1.023	0.812	1.508	1.828	1.6	1.238	1.103	0.81	1.413	1.352	1.043	0.859568
Q9NS15	Latent-transforming growth factor beta-binding protein 3 OS=Homo sapiens OX=9606 GN=LTBP3 PE=1 SV=4	LTBP3	1	1	1	1	139.3		119593				796223				305218		771119
P61626	Lysozyme C OS=Homo sapiens OX=9606 GN=LYZ PE=1 SV=1	LYZ	56	16	635	16	16.5	9.97314e+08	9.1008e+08	1.22019e+09	7.94977e+08	1.75374e+09	9.50247e+09	1.40879e+09	6.60179e+08	1.12064e+09	1.08149e+09	2.04677e+09	1.18247e+10	0.34	0.612	0.674	0.448	1.089	2.675	0.658	0.387	0.592	0.436	1.192	3.915	1.163	0.614734
A0A0B4J1U3	Immunoglobulin lambda variable 1-36 OS=Homo sapiens OX=9606 GN=IGLV1-36 PE=1 SV=5	IGLV1-36	49	3	19	3	12.5	5.08499e+06	7.20993e+06	6.30714e+06	8.16213e+06	1.01147e+07	1.17265e+07	1.07148e+07	9.66742e+06	6.63927e+06	1.00231e+07	8.11171e+06	9.85154e+06	0.557	1.56	1.121	1.478	2.019	1.061	1.61	1.822	1.128	1.301	1.519	1.049	1.281	0.524961
Q15365	Poly(rC)-binding protein 1 OS=Homo sapiens OX=9606 GN=PCBP1 PE=1 SV=2	PCBP1	19	5	8	5	37.5	5.28475e+06	582228			623235	2.97779e+06		389717		2.91895e+06		723051	2.592	0.564			0.557	1.207		0.329		1.696		0.345	0.435	0.241261
P35558	Phosphoenolpyruvate carboxykinase, cytosolic [GTP] OS=Homo sapiens OX=9606 GN=PCK1 PE=1 SV=3	PCK1	2	1	6	1	69.2	2.676e+06		656725		2.76227e+06	3.30885e+06	2.66784e+06				2.83432e+06	3.37803e+06
Q9NPG4	Protocadherin-12 OS=Homo sapiens OX=9606 GN=PCDH12 PE=1 SV=1	PCDH12	1	1	1	1	128.9
Q96CX2	BTB/POZ domain-containing protein KCTD12 OS=Homo sapiens OX=9606 GN=KCTD12 PE=1 SV=1	KCTD12	4	1	1	1	35.7
Q86X29	Lipolysis-stimulated lipoprotein receptor OS=Homo sapiens OX=9606 GN=LSR PE=1 SV=4	LSR	8	5	6	5	71.4						3.20369e+06						2.20459e+06						0.926						0.75	0.81
P15941	Mucin-1 OS=Homo sapiens OX=9606 GN=MUC1 PE=1 SV=3	MUC1	3	3	25	3	122	1.77663e+07	7.42574e+06	8.21335e+06	1.62383e+07	6.06626e+06	4.5055e+07	1.18507e+07	8.9394e+06	1.68638e+07	1.29624e+07	7.43822e+06	2.42974e+07	1.101	0.909	0.826	1.663	0.685	2.308	1.008	0.953	1.62	0.952	0.788	1.464	1.047	0.834374
Q92542	Nicastrin OS=Homo sapiens OX=9606 GN=NCSTN PE=1 SV=2	NCSTN	2	2	2	2	78.4			657664			432260			790664						1.61			0.539			1.849				1.148
P14543	Nidogen-1 OS=Homo sapiens OX=9606 GN=NID1 PE=1 SV=3	NID1	13	12	102	12	136.3	1.54642e+07	2.30281e+07	2.97614e+07	7.64339e+07	1.51857e+07	6.94536e+07	4.62657e+07	1.52783e+07	2.95503e+07	5.59515e+07	2.44554e+07	5.20921e+07	0.388	1.14	1.21	3.166	0.694	1.438	1.59	0.659	1.148	1.661	1.048	1.269	1.424	0.816974
P01714	Immunoglobulin lambda variable 3-19 OS=Homo sapiens OX=9606 GN=IGLV3-19 PE=1 SV=2	IGLV3-19	79	9	150	9	12	7.29306e+07	4.67319e+07	3.38503e+07	2.10433e+07	8.42812e+07	2.10892e+08	8.90735e+07	3.67462e+07	3.59752e+07	4.32149e+07	9.24011e+07	1.39906e+08	0.913	1.155	0.687	0.435	1.922	2.181	1.529	0.791	0.698	0.641	1.977	1.702	1.11	0.721899
A0A075B6J6	Immunoglobulin lambda variable 3-22 OS=Homo sapiens OX=9606 GN=IGLV3-22 PE=3 SV=1	IGLV3-22	14	1	10	1	12.5	6.90338e+06	3.71666e+06		583811	5.1953e+06	9.04657e+06	7.5531e+06	4.60021e+06		788975	5.6257e+06	7.6951e+06
O60237	Protein phosphatase 1 regulatory subunit 12B OS=Homo sapiens OX=9606 GN=PPP1R12B PE=1 SV=2	PPP1R12B	1	1	8	1	110.3	8.74376e+06	403892	1.50126e+06	579102	748302	5.89071e+06	7.50218e+06	1.61589e+06	1.16288e+06	594543	3.31003e+06	3.23985e+06
P02144	Myoglobin OS=Homo sapiens OX=9606 GN=MB PE=1 SV=2	MB	51	11	92	11	17.2	3.0888e+07	6.06737e+07	6.15394e+07	7.53905e+07	6.53042e+07	5.81925e+08	8.26053e+07	2.95834e+07	2.78113e+07	7.63666e+07	1.12978e+08	2.79513e+08	0.236	0.916	0.763	0.953	0.91	3.676	0.866	0.389	0.33	0.692	1.477	2.077	1.24	0.718761
Q99574	Neuroserpin OS=Homo sapiens OX=9606 GN=SERPINI1 PE=1 SV=1	SERPINI1	7	3	6	3	46.4	1.9182e+06	226922	1.20095e+06		373353	931522	341460	275203	1.47204e+06	1.13135e+06		487882	2.171	0.507	2.205		0.77	0.871	0.53	0.536	2.582	1.517		0.537	0.772	0.326178
Q96NY8	Nectin-4 OS=Homo sapiens OX=9606 GN=NECTIN4 PE=1 SV=1	NECTIN4	14	6	28	6	55.4	1.4959e+06	1.82935e+06	2.32381e+06	3.21366e+06	535657	5.23602e+06	2.16013e+06	2.37611e+06	2.79564e+06	3.2233e+06	1.47555e+06	2.34535e+06	0.585	1.413	1.475	2.078	0.382	1.693	1.159	1.599	1.696	1.494	0.987	0.892	1.349	0.554407
P05121	Plasminogen activator inhibitor 1 OS=Homo sapiens OX=9606 GN=SERPINE1 PE=1 SV=1	SERPINE1	12	4	4	4	45			356847		343138	143576					477401	3.75691e+06			0.539		0.582	0.11					0.76	3.401	16.112	0.450591
Q8NC51	Plasminogen activator inhibitor 1 RNA-binding protein OS=Homo sapiens OX=9606 GN=SERBP1 PE=1 SV=2	SERBP1	18	5	6	5	44.9	2.42488e+06									453330			1.594									0.353
Q6P4A8	Phospholipase B-like 1 OS=Homo sapiens OX=9606 GN=PLBD1 PE=1 SV=2	PLBD1	4	2	2	2	63.2				308440	80131.9				324830	2.31645e+06	77750.6					0.776	0.222				0.766	4.176	0.202		3.146	0.535675
P03952	Plasma kallikrein OS=Homo sapiens OX=9606 GN=KLKB1 PE=1 SV=1	KLKB1	34	20	143	19	71.3	1.11235e+07	1.04536e+07	2.15966e+07	2.36503e+07	7.3776e+07	6.17987e+07	3.10784e+07	1.18437e+07	3.0616e+07	3.18851e+07	1.02429e+08	8.06722e+07	0.257	0.477	0.81	0.904	3.109	1.181	0.986	0.471	1.097	0.873	4.049	1.813	1.664	0.123321
P01706	Immunoglobulin lambda variable 2-11 OS=Homo sapiens OX=9606 GN=IGLV2-11 PE=1 SV=2	IGLV2-11	44	9	221	2	12.6	3.8529e+07	2.3522e+07	1.24051e+07	1.62515e+07	5.31793e+07	5.76968e+07	4.50395e+07	3.12215e+07	1.07471e+07	2.39357e+07	5.57077e+07	3.96412e+07	1.072	1.293	0.56	0.747	2.697	1.327	1.719	1.495	0.464	0.789	2.651	1.072	1.073	0.698406
P04211	Immunoglobulin lambda variable 7-43 OS=Homo sapiens OX=9606 GN=IGLV7-43 PE=3 SV=2	IGLV7-43	23	4	113	1	12.4	8.76055e+06	6.09293e+06	4.04179e+06	3.90187e+06	1.01501e+07	8.38192e+06	7.71903e+06	4.75728e+06	4.33016e+06	5.47107e+06	8.79827e+06	5.04553e+06
Q7Z3B1	Neuronal growth regulator 1 OS=Homo sapiens OX=9606 GN=NEGR1 PE=1 SV=3	NEGR1	8	3	18	3	38.7	2.60893e+06	614321			1.96311e+06	7.43613e+06	1.92363e+06	1.32519e+06			750439	6.16936e+06	0.866	0.403			1.188	2.04	0.876	0.757			0.426	1.991	1.056	0.785337
P15531	Nucleoside diphosphate kinase A OS=Homo sapiens OX=9606 GN=NME1 PE=1 SV=1	NME1	19	2	8	2	17.1	1.08948e+07	353128	859544	516301	576563	351726	295789	287064	873501	2.15239e+06	475918	224505	6.923	0.443	0.886	0.542	0.668	0.185	0.258	0.314	0.861	1.62	0.517	0.139	1.039	0.424682
Q5VVQ6	Ubiquitin thioesterase OTU1 OS=Homo sapiens OX=9606 GN=YOD1 PE=1 SV=1	YOD1	8	2	2	2	38.3					131380	181107			147876	459774	204040	104423					1.106	0.691			1.059	2.516	1.611	0.469	1.068	0.99047
P13667	Protein disulfide-isomerase A4 OS=Homo sapiens OX=9606 GN=PDIA4 PE=1 SV=2	PDIA4	1	1	2	1	72.9
Q5SSG8	Mucin-21 OS=Homo sapiens OX=9606 GN=MUC21 PE=1 SV=2	MUC21	2	1	1	1	54.2								213764		643791
P10619	Lysosomal protective protein OS=Homo sapiens OX=9606 GN=CTSA PE=1 SV=2	CTSA	15	6	41	6	54.4	4.19605e+07	4.96119e+06	3.7915e+07	6.08366e+07	6.47399e+06	4.07901e+07	2.08533e+07	2.50733e+07	2.48941e+07	9.31942e+06	6.52017e+06	1.17609e+07	1.635	0.382	2.397	3.917	0.46	1.313	1.114	1.68	1.503	0.43	0.434	0.445	1.183	0.402889
Q08174	Protocadherin-1 OS=Homo sapiens OX=9606 GN=PCDH1 PE=1 SV=2	PCDH1	7	6	23	6	114.7	6.20867e+06	3.34305e+06	3.02763e+06	6.20327e+06	2.41865e+06	1.62399e+07	6.91896e+06	1.88961e+06	3.22879e+06	4.76063e+06	2.62963e+06	1.1894e+07	1.025	1.09	0.811	1.692	0.728	2.215	1.567	0.537	0.826	0.931	0.742	1.908	0.912	0.382593
P21810	Biglycan OS=Homo sapiens OX=9606 GN=BGN PE=1 SV=2	BGN	14	4	8	4	41.6	62628.8	183131	1.09982e+06	644540		3.68724e+06	2.89679e+06	839719	47617	995776	241589	2.70808e+06	0.049	0.281	1.385	0.827		2.364	3.084	1.121	0.057	0.915	0.321	2.043	13.788	0.719438
P45877	Peptidyl-prolyl cis-trans isomerase C OS=Homo sapiens OX=9606 GN=PPIC PE=1 SV=1	PPIC	17	4	48	3	22.7	2.47222e+06	5.09114e+06	3.2184e+06	1.99531e+06	5.7363e+06	8.86259e+07	1.28046e+07	4.22112e+06	1.88612e+06	7.44315e+06	7.13603e+06	1.04328e+08	0.115	0.466	0.242	0.153	0.484	3.393	0.814	0.336	0.135	0.409	0.565	4.699	2.264	0.320733
Q06323	Proteasome activator complex subunit 1 OS=Homo sapiens OX=9606 GN=PSME1 PE=1 SV=1	PSME1	19	5	5	5	28.7	5.31177e+06		873585	231611	317445	298226	176701	492782	401600	746789	907328		5.149		1.374	0.371	0.561	0.239	0.235	0.822	0.603	0.858	1.504		1.37	0.620728
P15153	Ras-related C3 botulinum toxin substrate 2 OS=Homo sapiens OX=9606 GN=RAC2 PE=1 SV=1	RAC2	14	3	9	3	21.4	8.24993e+06		1.67714e+06	2.07055e+06		1.641e+06		370377	2.37196e+06	4.05694e+06	284648	633765	3.289		1.085	1.364		0.54		0.254	1.466	1.916	0.194	0.246	1.07	0.907495
P05976	Myosin light chain 1/3, skeletal muscle isoform OS=Homo sapiens OX=9606 GN=MYL1 PE=1 SV=3	MYL1	39	5	8	5	21.1						6.36016e+06						5.31993e+06						0.851						0.837	0.984
Q53FA7	Quinone oxidoreductase PIG3 OS=Homo sapiens OX=9606 GN=TP53I3 PE=1 SV=2	TP53I3	12	3	5	2	35.5		86267.5		110640	186732			129626		530122	125918			0.827		0.887	1.652			1.082		3.048	1.045		1.792	0.550934
P20151	Kallikrein-2 OS=Homo sapiens OX=9606 GN=KLK2 PE=1 SV=1	KLK2	13	4	6	2	28.7	150094		2.01202e+06		259107	503450		567568	585679	256093			0.229		4.988		0.721	0.636		1.491	1.387	0.463			0.278
O95202	Mitochondrial proton/calcium exchanger protein OS=Homo sapiens OX=9606 GN=LETM1 PE=1 SV=1	LETM1	1	1	1	1	83.3	708033
P20700	Lamin-B1 OS=Homo sapiens OX=9606 GN=LMNB1 PE=1 SV=2	LMNB1	8	5	7	4	66.4	3.8842e+06				494409	2.72587e+06			434259	559104	172333	1.6391e+06	2.595				0.602	1.505			0.45	0.443	0.197	1.065	0.517	0.308872
Q9Y446	Plakophilin-3 OS=Homo sapiens OX=9606 GN=PKP3 PE=1 SV=1	PKP3	1	1	1	1	87
Q9NP72	Ras-related protein Rab-18 OS=Homo sapiens OX=9606 GN=RAB18 PE=1 SV=1	RAB18	4	1	3	1	23			484700	594218	296784	4.98232e+06		246080	9.14317e+06	780832	748182	2.96673e+06
P22894	Neutrophil collagenase OS=Homo sapiens OX=9606 GN=MMP8 PE=1 SV=1	MMP8	3	2	4	2	53.4						101421			180069	219299		587340						0.291			0.971	0.903		1.985	6.821
P31939	Bifunctional purine biosynthesis protein ATIC OS=Homo sapiens OX=9606 GN=ATIC PE=1 SV=3	ATIC	3	2	2	2	64.6	890248		4.63664e+06						64230.3	153953			0.586		4.955						0.066	0.12			0.013
Q96C90	Protein phosphatase 1 regulatory subunit 14B OS=Homo sapiens OX=9606 GN=PPP1R14B PE=1 SV=3	PPP1R14B	30	2	4	2	15.9
Q16651	Prostasin OS=Homo sapiens OX=9606 GN=PRSS8 PE=1 SV=1	PRSS8	21	4	20	4	36.4	7.11368e+06	6.64435e+06	9.77202e+06	1.21673e+07	4.96969e+06	7.17915e+06	4.0337e+06	5.02903e+06	1.0749e+07	16981245	4.52287e+06	4.24565e+06	0.864	1.594	1.927	2.444	1.101	0.721	0.672	1.051	2.025	2.444	0.94	0.501	0.839	0.0576208
Q96TA1	Protein Niban 2 OS=Homo sapiens OX=9606 GN=NIBAN2 PE=1 SV=3	NIBAN2	4	3	4	3	84.1	474509	556341				6.48416e+06	961928	366881	250776	1.67307e+06	525859	7.22517e+06	0.218	0.505				2.463	0.607	0.29	0.179	0.911	0.413	3.228	1.556	0.642737
P15309	Prostatic acid phosphatase OS=Homo sapiens OX=9606 GN=ACP3 PE=1 SV=3	ACP3	46	13	155	13	44.5	7.68471e+06	3.00486e+08	8.29938e+07	1.97177e+07	1.20528e+08	6.53886e+06	1.25276e+06	4.01642e+08	5.82316e+08	2.08343e+07	7.91852e+07	2.44437e+06	0.054	4.143	0.94	0.228	1.534	0.038	0.012	4.824	6.303	0.172	0.945	0.017	1.652	0.733722
P09211	Glutathione S-transferase P OS=Homo sapiens OX=9606 GN=GSTP1 PE=1 SV=2	GSTP1	52	8	29	8	23.3	8.44685e+06	7.13827e+06	2.3719e+06	895066	2.84007e+06	7.64839e+06	5.69244e+06	2.76957e+06	2.70502e+06	2.78005e+07	922079	1.78888e+07	1.101	1.837	0.501	0.193	0.674	0.823	1.017	0.621	0.546	4.291	0.205	2.265	4.607	0.656054
P26583	High mobility group protein B2 OS=Homo sapiens OX=9606 GN=HMGB2 PE=1 SV=2	HMGB2	9	2	4	2	24	1.34872e+06		53436.3		202494	241992	2429.25		127914	1.03035e+06	220330		3.162		0.203		0.865	0.469	0.008		0.465	2.861	0.883		1.105	0.50936
P30740	Leukocyte elastase inhibitor OS=Homo sapiens OX=9606 GN=SERPINB1 PE=1 SV=1	SERPINB1	36	12	66	11	42.7	1.84093e+07	4.31402e+06	5.42188e+06	1.21013e+07	4.17321e+06	4.6941e+07	8.70337e+06	2.00158e+06	9.99766e+06	1.18145e+08	5.19863e+06	3.81383e+07	0.764	0.353	0.365	0.83	0.316	1.609	0.495	0.143	0.643	5.807	0.369	1.538	1.989	0.617776
P01705	Immunoglobulin lambda variable 2-23 OS=Homo sapiens OX=9606 GN=IGLV2-23 PE=1 SV=2	IGLV2-23	29	7	154	4	11.9	7.60766e+06	6.02478e+06	5.64331e+06	9.47495e+06	8.32914e+06	3.52416e+07	7.49404e+06	7.41118e+06	4.37787e+06	1.19321e+07	1.20777e+07	1.9408e+07	0.64	1	0.77	1.316	1.276	2.448	0.864	1.072	0.571	1.188	1.736	1.586	1.012	0.842394
Q13557	Calcium/calmodulin-dependent protein kinase type II subunit delta OS=Homo sapiens OX=9606 GN=CAMK2D PE=1 SV=3	CAMK2D	2	1	1	1	56.3		123158	651744				158708	279107	569079	217912
P41159	Leptin OS=Homo sapiens OX=9606 GN=LEP PE=1 SV=1	LEP	37	4	10	4	18.6			86092.2		269909	2.0198e+07						8.05413e+07			0.005		0.018	0.625						2.93	4.688
A8MUH7	Putative PDZ domain-containing protein PDZK1P1 OS=Homo sapiens OX=9606 GN=PDZK1P1 PE=5 SV=2	PDZK1P1	8	2	2	2	44	494799		846344	500515	461736				1.91388e+06		315334		0.62		1.719	1.036	1.054				3.715		0.675		1.401	0.833772
P46779	60S ribosomal protein L28 OS=Homo sapiens OX=9606 GN=RPL28 PE=1 SV=3	RPL28	12	2	2	2	15.7	1.61591e+06											21611.9	1.867											0.024
P48304	Lithostathine-1-beta OS=Homo sapiens OX=9606 GN=REG1B PE=1 SV=1	REG1B	46	7	106	2	18.7	2.69318e+06	4.21095e+06	1.36744e+06	523140	1.16409e+06	1.19139e+07	4.11288e+06	1.17045e+06	518651	1.33263e+06	2.23233e+06	6.55851e+06	0.809	2.497	0.666	0.26	0.637	2.956	1.694	0.605	0.241	0.474	1.146	1.914	1.161	0.696758
Q13151	Heterogeneous nuclear ribonucleoprotein A0 OS=Homo sapiens OX=9606 GN=HNRNPA0 PE=1 SV=1	HNRNPA0	5	1	1	1	30.8	367772
P49459	Ubiquitin-conjugating enzyme E2 A OS=Homo sapiens OX=9606 GN=UBE2A PE=1 SV=2	UBE2A	11	1	2	1	17.3	408064	213678				1.33118e+06		253032				826816
O75494	Serine/arginine-rich splicing factor 10 OS=Homo sapiens OX=9606 GN=SRSF10 PE=1 SV=1	SRSF10	4	1	1	1	31.3	1.26272e+06
P14868	Aspartate--tRNA ligase, cytoplasmic OS=Homo sapiens OX=9606 GN=DARS1 PE=1 SV=2	DARS1	8	3	4	3	57.1	2.50361e+06					250985	175140	127666		409427	161238	187017	4.345					0.36	0.417	0.381		0.842	0.478	0.315	0.485	0.463768
P37837	Transaldolase OS=Homo sapiens OX=9606 GN=TALDO1 PE=1 SV=2	TALDO1	20	7	13	7	37.5	1.46257e+08	5.59728e+07	1.0884e+08	8.185e+07	1.53131e+08	7.89543e+07	1.24913e+08	1.02032e+08	1.20723e+08	1.05731e+08	1.6315e+08	7.42565e+07	1.262	0.953	1.523	1.167	2.408	0.563	1.478	1.514	1.614	1.08	2.406	0.623	1.142	0.188011
P63146	Ubiquitin-conjugating enzyme E2 B OS=Homo sapiens OX=9606 GN=UBE2B PE=1 SV=1	UBE2B	11	1	2	1	17.3
P49207	60S ribosomal protein L34 OS=Homo sapiens OX=9606 GN=RPL34 PE=1 SV=3	RPL34	8	1	1	1	13.3
Q8WZ75	Roundabout homolog 4 OS=Homo sapiens OX=9606 GN=ROBO4 PE=1 SV=1	ROBO4	9	6	23	6	107.4	3.25974e+07	1.74302e+07	1.02152e+08	1.71296e+07	3.07894e+06	1.28306e+07	1.32561e+07	1.11963e+07	1.16419e+08	1.32356e+07	3.36415e+06	4.93553e+06	1.064	1.124	5.412	0.924	0.183	0.346	0.594	0.629	5.893	0.512	0.188	0.157	0.707	0.042373
Q13103	Secreted phosphoprotein 24 OS=Homo sapiens OX=9606 GN=SPP2 PE=1 SV=1	SPP2	21	4	19	4	24.3	827244	1.46513e+06	4.59964e+06	262679	1.79614e+06	8.77828e+06	3.43555e+06	320651	2.41728e+06	246600	381405	8.08963e+06	0.288	1.007	2.597	0.151	1.139	2.524	1.64	0.192	1.304	0.102	0.227	2.736	1.391	0.449528
P63165	Small ubiquitin-related modifier 1 OS=Homo sapiens OX=9606 GN=SUMO1 PE=1 SV=1	SUMO1	12	1	2	1	11.6	1.94834e+06					1.51862e+06				879828		722658
O76070	Gamma-synuclein OS=Homo sapiens OX=9606 GN=SNCG PE=1 SV=2	SNCG	20	2	3	2	13.3	2.07187e+06					2.28951e+06	2.24003e+06					1.88912e+06	0.923					0.843	1.369					0.818	1.227	0.548523
O75083	WD repeat-containing protein 1 OS=Homo sapiens OX=9606 GN=WDR1 PE=1 SV=4	WDR1	4	3	15	3	66.2	6.89206e+06		1.02394e+06	1.23089e+06	1.5312e+06	2.70923e+06	3.45646e+06	205950	864551	3.15644e+06	1.64902e+06	1.45015e+06	2.967		0.715	0.876	1.201	0.964	2.041	0.153	0.577	1.61	1.214	0.607	0.995	0.675376
Q96PX8	SLIT and NTRK-like protein 1 OS=Homo sapiens OX=9606 GN=SLITRK1 PE=1 SV=2	SLITRK1	5	2	3	2	77.7
P48594	Serpin B4 OS=Homo sapiens OX=9606 GN=SERPINB4 PE=1 SV=2	SERPINB4	44	18	47	4	44.8			896540		445717			831589	752875	1.71422e+07					0.343		0.191			0.337	0.275	4.785			0.802
Q9BRA2	Thioredoxin domain-containing protein 17 OS=Homo sapiens OX=9606 GN=TXNDC17 PE=1 SV=1	TXNDC17	54	6	26	6	13.9	2.51828e+06	1.31395e+06	4.59872e+06	368526	396181	2.71682e+07	1.0974e+06	740366	4.07247e+06	1.69139e+06	1.45332e+06	2.36556e+07	0.414	0.426	1.226	0.1	0.119	3.689	0.247	0.209	1.037	0.329	0.408	3.778	1.613	0.632541
Q9Y3D7	Mitochondrial import inner membrane translocase subunit TIM16 OS=Homo sapiens OX=9606 GN=PAM16 PE=1 SV=2	PAM16	6	1	1	1	13.8	373279		1978.68									300026
P26368	Splicing factor U2AF 65 kDa subunit OS=Homo sapiens OX=9606 GN=U2AF2 PE=1 SV=4	U2AF2	8	3	3	3	53.5	3.70481e+06												0.946
Q9UL52	Transmembrane protease serine 11E OS=Homo sapiens OX=9606 GN=TMPRSS11E PE=1 SV=2	TMPRSS11E	6	1	1	1	47.7		1.67811e+06				1.88171e+06				1.79091e+06		1.02133e+06
O15231	Zinc finger protein 185 OS=Homo sapiens OX=9606 GN=ZNF185 PE=1 SV=3	ZNF185	2	2	3	2	73.5	1.4964e+06	667366	555975	1.07663e+06				613940	605727	4.98242e+06	1.67069e+06	467387	1.05	0.924	0.633	1.248				0.741	0.659	4.14	2.004	0.319	1.72	0.517899
P02774	Vitamin D-binding protein OS=Homo sapiens OX=9606 GN=GC PE=1 SV=2	GC	71	39	1859	39	52.9	6.78774e+09	6.43706e+09	5.8167e+09	3.96749e+09	7.05616e+09	5.73971e+09	5.40179e+09	5.34271e+09	4.20695e+09	4.32451e+09	6.84546e+09	5.68632e+09	1.14	2.134	1.584	1.101	2.159	0.796	1.244	1.543	1.095	0.86	1.965	0.928	0.894	0.197097
Q15326	Zinc finger MYND domain-containing protein 11 OS=Homo sapiens OX=9606 GN=ZMYND11 PE=1 SV=2	ZMYND11	1	1	6	1	70.9	831330	304142	281692	152737	983376	440147	508155	266845	399233		1.23207e+06	507998
Q9P0L0	Vesicle-associated membrane protein-associated protein A OS=Homo sapiens OX=9606 GN=VAPA PE=1 SV=3	VAPA	5	1	1	1	27.9	481136						670786			457711
P17987	T-complex protein 1 subunit alpha OS=Homo sapiens OX=9606 GN=TCP1 PE=1 SV=1	TCP1	7	4	5	4	60.3	1.21537e+06		86701.8				656364		151843	239375			2.446		0.283				1.812		0.474	0.571			1.208	0.835411
Q6UXI7	Vitrin OS=Homo sapiens OX=9606 GN=VIT PE=2 SV=1	VIT	1	1	1	1	73.9
O15498	Synaptobrevin homolog YKT6 OS=Homo sapiens OX=9606 GN=YKT6 PE=1 SV=1	YKT6	4	1	2	1	22.4	375003					899605	217801					816420
P16035	Metalloproteinase inhibitor 2 OS=Homo sapiens OX=9606 GN=TIMP2 PE=1 SV=2	TIMP2	6	1	13	1	24.4	1.1161e+06	658326	1.31294e+06	1.54884e+06	1.46005e+06	8.01967e+06	1.03329e+06	1.33058e+06	1.94761e+06	2.41595e+06	1.38069e+06	1.0453e+07
P21796	Voltage-dependent anion-selective channel protein 1 OS=Homo sapiens OX=9606 GN=VDAC1 PE=1 SV=2	VDAC1	4	1	1	1	30.8
P07911	Uromodulin OS=Homo sapiens OX=9606 GN=UMOD PE=1 SV=1	UMOD	34	16	378	16	69.7	2.31218e+08	2.17418e+08	1.87203e+08	8.61172e+08	3.33286e+08	4.42611e+08	2.19873e+08	6.06919e+08	2.04526e+08	1.242e+09	3.37918e+08	1.37434e+08	0.523	0.97	0.687	3.217	1.373	0.827	0.682	2.36	0.717	3.326	1.306	0.302	1.188	0.912586
Q96IQ7	V-set and immunoglobulin domain-containing protein 2 OS=Homo sapiens OX=9606 GN=VSIG2 PE=1 SV=1	VSIG2	5	1	1	1	34.3
P40222	Alpha-taxilin OS=Homo sapiens OX=9606 GN=TXLNA PE=1 SV=3	TXLNA	1	1	3	1	61.9	9.10884e+06	6.41409e+06	4.80921e+06	4.56665e+06	7.11565e+06	2.24145e+07	4.07289e+06	6.73876e+06	7.2785e+06	6121428	6.28825e+06	1.04889e+07
P55060	Exportin-2 OS=Homo sapiens OX=9606 GN=CSE1L PE=1 SV=3	CSE1L	3	2	2	2	110.3	814555					749459	1.11157e+06			453075		700735	1.006					0.765	1.883			0.663		0.841	1.486	0.404535
Q9NQW7	Xaa-Pro aminopeptidase 1 OS=Homo sapiens OX=9606 GN=XPNPEP1 PE=1 SV=3	XPNPEP1	3	2	8	1	69.9	610368	129374	299151	388890		650070	159128		484028			422256
P11684	Uteroglobin OS=Homo sapiens OX=9606 GN=SCGB1A1 PE=1 SV=1	SCGB1A1	51	4	164	4	10	1.0838e+09	1.00402e+09	8.97481e+08	3.98228e+08	4.88909e+08	7.18139e+08	9.69039e+08	9.56585e+08	7.64779e+08	4.3795e+08	5.9301e+08	4.87964e+08	1.398	2.557	1.878	0.849	1.149	0.765	1.715	2.122	1.529	0.669	1.308	0.612	0.933	0.334363
P63313	Thymosin beta-10 OS=Homo sapiens OX=9606 GN=TMSB10 PE=1 SV=2	TMSB10	34	1	1	1	5	8.24079e+06					583616
P19320	Vascular cell adhesion protein 1 OS=Homo sapiens OX=9606 GN=VCAM1 PE=1 SV=1	VCAM1	25	16	105	16	81.2	6.13848e+07	5.00824e+07	3.57594e+07	4.21949e+07	4.03573e+07	9.91494e+07	3.29595e+07	6.77834e+07	2.49225e+07	3.93211e+07	2.18849e+07	6.52489e+07	1.199	1.932	1.133	1.362	1.437	1.6	0.883	2.278	0.755	0.91	0.731	1.239	0.756	0.0385924
O75351	Vacuolar protein sorting-associated protein 4B OS=Homo sapiens OX=9606 GN=VPS4B PE=1 SV=2	VPS4B	6	2	4	2	49.3	10088.1	1851.78		50434.5	3397.64	4453.52	7808.1					5238.82	0.802	0.291		6.628	0.492	0.293	0.852					0.405	1.222	0.382419
Q9BRT3	Migration and invasion enhancer 1 OS=Homo sapiens OX=9606 GN=MIEN1 PE=1 SV=1	MIEN1	30	2	10	2	12.4	3.35195e+06	464317	3.09691e+06	1.56383e+06	1.10247e+06	3.86196e+06	2.72379e+06	952790	3.80306e+06	1.42551e+06	726807	4.32111e+06	1.389	0.38	2.082	1.071	0.833	1.322	1.548	0.679	2.443	0.7	0.515	1.74	1.11	0.838487
P30101	Protein disulfide-isomerase A3 OS=Homo sapiens OX=9606 GN=PDIA3 PE=1 SV=4	PDIA3	15	6	11	6	56.7	1.31836e+07					2.81949e+06				6.01956e+06	307808	2.31831e+06	2.53					0.447				1.368	0.101	0.432	0.966
P23470	Receptor-type tyrosine-protein phosphatase gamma OS=Homo sapiens OX=9606 GN=PTPRG PE=1 SV=4	PTPRG	5	5	20	5	161.9	1.6571e+06	3.87933e+06	3.30705e+06	1.4862e+07	2.21167e+06	8.09073e+06	2.61247e+06	3.71432e+06	2.41322e+06	1.04032e+07	2.74174e+06	4.07546e+06	0.314	1.45	1.016	4.649	0.763	1.265	0.678	1.209	0.708	2.333	0.887	0.75	0.991	0.549415
Q9HB40	Retinoid-inducible serine carboxypeptidase OS=Homo sapiens OX=9606 GN=SCPEP1 PE=1 SV=1	SCPEP1	7	3	13	3	50.8	4.02281e+06	2.19496e+06	4.03524e+06	4.56779e+06	2.71217e+06	2.84269e+06	2.14858e+06	2.67481e+06	4.42585e+06	569916	1.951e+06	1.66082e+06	1.351	1.455	2.198	2.535	1.66	0.789	0.99	1.545	2.304	0.227	1.12	0.542	0.716	0.196733
P49321	Nuclear autoantigenic sperm protein OS=Homo sapiens OX=9606 GN=NASP PE=1 SV=2	NASP	3	2	2	2	85.2	2.51967e+06	318399	478776	424293				351139	522046				3.099	0.773	0.955	0.862				0.743	0.995				1.002	0.988563
P35579	Myosin-9 OS=Homo sapiens OX=9606 GN=MYH9 PE=1 SV=4	MYH9	15	25	39	25	226.4	1.57201e+07	1.68966e+06	4.71914e+06	2.56067e+06	4.22635e+06	1.03667e+07	4.30519e+06	2.00236e+06	5.22036e+06	2.78767e+07	3.8063e+06	1.04923e+07	1.919	0.407	0.935	0.517	0.94	1.046	0.721	0.42	0.988	4.031	0.794	1.245	2.049	0.654311
Q86UD1	Out at first protein homolog OS=Homo sapiens OX=9606 GN=OAF PE=2 SV=1	OAF	32	6	18	6	30.7	6.06974e+06	5.25744e+06		7.24194e+06	6.37962e+06	4.52007e+07	1.04512e+07			1.93145e+06	4.77634e+06	3.82341e+07	0.412	0.704		0.812	0.788	2.533	0.972			0.155	0.554	2.52	1.062	0.618642
P80108	Phosphatidylinositol-glycan-specific phospholipase D OS=Homo sapiens OX=9606 GN=GPLD1 PE=1 SV=3	GPLD1	9	6	30	6	92.3	1.80626e+06	5.10088e+06	5.49788e+06	2.99732e+06	1.57138e+07	1.6885e+06	753959	1.16294e+07	7.94828e+06	2.14504e+06	1.08741e+06	1.37063e+06	0.355	1.98	1.754	0.974	5.63	0.274	0.203	3.932	2.422	0.5	0.365	0.262	0.912	0.358263
Q14533	Keratin, type II cuticular Hb1 OS=Homo sapiens OX=9606 GN=KRT81 PE=1 SV=3	KRT81	3	2	16	1	54.9	1.61756e+06			3.91913e+06	2.35386e+06		3.7663e+06	1.37456e+06	2.31882e+06	4215279	2.82143e+06
P08254	Stromelysin-1 OS=Homo sapiens OX=9606 GN=MMP3 PE=1 SV=2	MMP3	9	4	11	4	53.9	356068		2.75473e+06			5.6527e+06	1.33899e+06	684417	1.59714e+06	895950	340336	8.83565e+06	0.135		1.694			1.771	0.696	0.446	0.939	0.402	0.221	3.256	2.516	0.481219
P09237	Matrilysin OS=Homo sapiens OX=9606 GN=MMP7 PE=1 SV=1	MMP7	5	2	5	1	29.7	1.36557e+07	9.98726e+06	8.64754e+06	8.98964e+06	2.52545e+07	8.06599e+06	1.58216e+07	1.32891e+07	9.87653e+06	9759014	1.65355e+07	9.49496e+06
P10412	Histone H1.4 OS=Homo sapiens OX=9606 GN=H1-4 PE=1 SV=2	H1-4	31	7	26	2	21.9	1.27235e+08	3.14653e+07	2.0498e+07	8.9679e+06	1.96626e+06	2.52151e+06	1.88988e+06	1.17575e+07	1.81546e+07	4.30465e+07	2.11359e+06	1.9766e+06	5.317	2.597	1.39	0.619	0.15	0.087	0.108	0.845	1.176	2.131	0.151	0.08	1.093	0.390455
Q7Z4V5	Hepatoma-derived growth factor-related protein 2 OS=Homo sapiens OX=9606 GN=HDGFL2 PE=1 SV=1	HDGFL2	3	2	2	2	74.3	415880			171136	165684	227402				234141		272953	1.587			1.079	1.152	0.717				1.058		1.012	1.196	0.53627
P34932	Heat shock 70 kDa protein 4 OS=Homo sapiens OX=9606 GN=HSPA4 PE=1 SV=4	HSPA4	3	2	2	2	94.3
P00738	Haptoglobin OS=Homo sapiens OX=9606 GN=HP PE=1 SV=1	HP	76	53	2435	31	45.2	3.7118e+10	2.46931e+09	3.78352e+09	2.59352e+09	2.58926e+10	6.29908e+09	1.50205e+10	1.90664e+09	6.34568e+09	2.27144e+09	1.44106e+10	6.10149e+09	3.392	0.446	0.561	0.392	4.312	0.476	1.883	0.3	0.899	0.246	2.251	0.542	0.853	0.230833
P07288	Prostate-specific antigen OS=Homo sapiens OX=9606 GN=KLK3 PE=1 SV=2	KLK3	77	14	78	12	28.7		2.01229e+08	5.23279e+07	3.6747e+06	5.03452e+07	6.58453e+07	2.50799e+07	2.93087e+08	4.35839e+08	21229323	4.94083e+07	7.86299e+07		3.238	0.692	0.049	0.748	0.443	0.28	4.109	5.506	0.205	0.688	0.623	3.147	0.121363
P12004	Proliferating cell nuclear antigen OS=Homo sapiens OX=9606 GN=PCNA PE=1 SV=1	PCNA	6	2	3	2	28.8	2.92259e+06						1.56616e+06		2.63069e+06	30012336			0.298						0.219		0.416	3.623			0.735
P00491	Purine nucleoside phosphorylase OS=Homo sapiens OX=9606 GN=PNP PE=1 SV=2	PNP	7	1	1	1	32.1
P13796	Plastin-2 OS=Homo sapiens OX=9606 GN=LCP1 PE=1 SV=6	LCP1	44	22	113	17	70.2	7.23355e+07	1.88678e+07	2.04665e+07	1.55239e+07	4.4844e+07	4.56368e+07	2.83011e+07	2.50338e+07	3.23622e+07	6.33588e+07	2.49246e+07	4.01104e+07	1.902	0.979	0.873	0.674	2.149	0.991	1.021	1.132	1.319	1.973	1.12	1.025	1.281	0.816188
Q9UDW1	Cytochrome b-c1 complex subunit 9 OS=Homo sapiens OX=9606 GN=UQCR10 PE=1 SV=3	UQCR10	11	1	1	1	7.3	722173			67897.4	114440		67125.2			82858.7	95843.9
Q9HD89	Resistin OS=Homo sapiens OX=9606 GN=RETN PE=1 SV=1	RETN	52	4	59	4	11.4	4.48009e+07	3.69571e+07	1.83482e+07	1.42223e+07	1.42078e+07	4.55413e+07	2.81679e+07	4.95386e+07	2.03346e+07	1.14285e+07	1.84542e+07	3.82175e+07	1.495	2.435	0.993	0.784	0.864	1.255	1.289	2.843	1.052	0.452	1.053	1.239	0.979	0.672774
Q16769	Glutaminyl-peptide cyclotransferase OS=Homo sapiens OX=9606 GN=QPCT PE=1 SV=1	QPCT	28	5	28	5	40.9	4.3475e+06	3.85153e+06	3.84978e+06	4.36116e+06	3.67908e+06	8.38336e+06	4.98505e+06	5.17757e+06	5.52717e+06	3.55992e+06	4.87649e+06	8.66251e+06	0.806	1.409	1.157	1.335	1.242	1.283	1.267	1.65	1.588	0.781	1.545	1.56	1.193	0.384827
P49792	E3 SUMO-protein ligase RanBP2 OS=Homo sapiens OX=9606 GN=RANBP2 PE=1 SV=2	RANBP2	0	1	8	1	358	2.84409e+06	2.01799e+06	5.41377e+06	2.32851e+06	2.28089e+06	2.58061e+07	5.04908e+06	3.2296e+06	4.17818e+06	5032159	2.56129e+06	2.54115e+07
Q7Z7M0	Multiple epidermal growth factor-like domains protein 8 OS=Homo sapiens OX=9606 GN=MEGF8 PE=1 SV=2	MEGF8	1	1	2	1	302.9				212997				147271	146600	117560
A0A0C4DH69	Immunoglobulin kappa variable 1-9 OS=Homo sapiens OX=9606 GN=IGKV1-9 PE=3 SV=1	IGKV1-9	37	12	331	1	12.7	2.0046e+07	3.35479e+07	1.74952e+07	2.19648e+07	5.59592e+07	4.0668e+07	2.71031e+07	3.16619e+07	2.35423e+07	27670466	4.2926e+07	3.24257e+07
Q8NES3	Beta-1,3-N-acetylglucosaminyltransferase lunatic fringe OS=Homo sapiens OX=9606 GN=LFNG PE=1 SV=2	LFNG	11	3	5	3	41.7						6.96374e+06	948631	238514			431523	4.53234e+06						2.075	0.469	0.148			0.266	1.589	0.766
P18054	Polyunsaturated fatty acid lipoxygenase ALOX12 OS=Homo sapiens OX=9606 GN=ALOX12 PE=1 SV=4	ALOX12	24	13	14	13	75.6	1.15023e+07	8.18692e+06	3.67004e+06	8.09283e+06	1.08271e+07	2.38731e+07	1.09762e+07	3.10585e+06	2.41815e+06	24483812	1.22958e+07	1.18528e+07	0.994	1.398	0.515	1.156	1.706	1.705	1.302	0.462	0.324	2.508	1.818	0.996	1.015	0.56846
Q9BU23	Lipase maturation factor 2 OS=Homo sapiens OX=9606 GN=LMF2 PE=1 SV=2	LMF2	1	1	1	1	79.6	4.89224e+07								1.40175e+06	5079400
P26572	Alpha-1,3-mannosyl-glycoprotein 2-beta-N-acetylglucosaminyltransferase OS=Homo sapiens OX=9606 GN=MGAT1 PE=1 SV=2	MGAT1	6	2	3	2	50.8					411014	1.79044e+06						2.21943e+06					0.481	0.95						1.385	1.458
P21757	Macrophage scavenger receptor types I and II OS=Homo sapiens OX=9606 GN=MSR1 PE=1 SV=1	MSR1	8	2	3	2	49.7	931221	283698			490473	905227		1.18084e+06	316403	1.17227e+06	789688	749480	1.162	0.699			1.116	0.934		2.536	0.612	1.734	1.685	0.909	2.037	0.285973
Q99572	P2X purinoceptor 7 OS=Homo sapiens OX=9606 GN=P2RX7 PE=1 SV=4	P2RX7	2	1	1	1	68.5		476570				920704		507647				404517
Q92626	Peroxidasin homolog OS=Homo sapiens OX=9606 GN=PXDN PE=1 SV=2	PXDN	1	2	5	2	165.2						6.17219e+06					442661	3.55099e+06						1.424					0.211	0.963	0.676
P30041	Peroxiredoxin-6 OS=Homo sapiens OX=9606 GN=PRDX6 PE=1 SV=3	PRDX6	46	10	34	10	25	5.71848e+07	2.66629e+07	3.79508e+07	5.67528e+07	2.73593e+07	2.44051e+07	5.29328e+07	4.24876e+07	5.49285e+07	7.13492e+07	2.26508e+07	2.82251e+07	1.291	1.188	1.39	2.117	1.125	0.455	1.639	1.65	1.922	1.908	0.874	0.619	1.18	0.232521
Q9UMS4	Pre-mRNA-processing factor 19 OS=Homo sapiens OX=9606 GN=PRPF19 PE=1 SV=1	PRPF19	1	1	1	1	55.1	946778
P61353	60S ribosomal protein L27 OS=Homo sapiens OX=9606 GN=RPL27 PE=1 SV=2	RPL27	18	3	5	3	15.8	6.17226e+06	40122.2							90395.1	64052.8			3.668	0.047							0.083	0.045
O76021	Ribosomal L1 domain-containing protein 1 OS=Homo sapiens OX=9606 GN=RSL1D1 PE=1 SV=3	RSL1D1	4	2	2	2	54.9	587522												0.946
P02766	Transthyretin OS=Homo sapiens OX=9606 GN=TTR PE=1 SV=1	TTR	71	23	1219	23	15.9	2.96252e+09	5.74569e+09	5.68287e+09	3.04673e+09	4.07674e+09	5.36984e+09	4.17685e+09	3.64034e+09	4.81708e+09	3.41006e+09	5.51655e+09	5.55622e+09	0.623	2.385	1.938	1.058	1.562	0.933	1.204	1.316	1.57	0.849	1.982	1.135	1.097	0.952499
O00241	Signal-regulatory protein beta-1 OS=Homo sapiens OX=9606 GN=SIRPB1 PE=1 SV=5	SIRPB1	22	8	27	5	43.2	5.11873e+06	1.89057e+06	2.81017e+06	5.09708e+06	562261	1.34222e+07	3.45737e+06	2.54421e+06	591978	2.40721e+06	1.76747e+06	4.36982e+06	1.319	0.962	1.175	2.171	0.264	2.858	1.222	1.128	0.237	0.735	0.779	1.095	0.996	0.350655
P26639	Threonine--tRNA ligase 1, cytoplasmic OS=Homo sapiens OX=9606 GN=TARS1 PE=1 SV=3	TARS1	5	3	4	3	83.4	1.35889e+06	1.67346e+06	5.33972e+06	1.00077e+06		1.81568e+06	856305		1.28837e+06			1.51013e+06	0.693	1.685	4.417	0.843		0.765	0.599		1.018			0.748	0.691	0.35969
P07437	Tubulin beta chain OS=Homo sapiens OX=9606 GN=TUBB PE=1 SV=2	TUBB	57	19	44	6	49.6	9.22365e+07	45245.9	6.967e+06	3.618e+06	5.56119e+06	8.57767e+06	3.94474e+06	121700	5.97083e+06	2.21516e+07	9.61045e+06	4.13299e+06	6.425	0.006	0.788	0.417	0.706	0.494	0.377	0.015	0.645	1.828	1.145	0.28	1.658	0.853214
P30530	Tyrosine-protein kinase receptor UFO OS=Homo sapiens OX=9606 GN=AXL PE=1 SV=4	AXL	5	4	21	4	98.3	2.5186e+06	1.79048e+06	1.36128e+06	1.07395e+07	392119	5.69556e+06	393624	497302	505773	6.14226e+06		3.24277e+06	0.787	1.105	0.691	5.549	0.223	1.471	0.169	0.267	0.245	2.275		0.985	0.378	0.00643661
Q9NTK5	Obg-like ATPase 1 OS=Homo sapiens OX=9606 GN=OLA1 PE=1 SV=2	OLA1	5	1	2	1	44.7	2.85194e+06		583240	623964	665817	570436	681734	904807	197625	1.20553e+06	133783	93756.4
P98160	Basement membrane-specific heparan sulfate proteoglycan core protein OS=Homo sapiens OX=9606 GN=HSPG2 PE=1 SV=4	HSPG2	18	58	941	58	468.5	1.96271e+09	1.98279e+09	2.22458e+09	9.81947e+08	1.01921e+09	4.27703e+09	1.52631e+09	2.0596e+09	2.17125e+09	1.84093e+09	1.1776e+09	3.21654e+09	0.912	1.818	1.676	0.754	0.863	1.641	0.972	1.645	1.563	1.013	0.935	1.452	1.036	0.718775
Q9NUM4	Transmembrane protein 106B OS=Homo sapiens OX=9606 GN=TMEM106B PE=1 SV=2	TMEM106B	4	1	4	1	31.1	1.50204e+06	6.65907e+06	1.35832e+06	1.55662e+06		640927			857717			587279
P10599	Thioredoxin OS=Homo sapiens OX=9606 GN=TXN PE=1 SV=3	TXN	41	5	23	5	11.7	9.27793e+06	4.80562e+06	4.00585e+06	6.26063e+06	2.14931e+06	5.72568e+07	6.88076e+06	7.4028e+06	5.2401e+06	1.70694e+07	963747	4.98622e+07	0.615	0.629	0.431	0.686	0.26	3.137	0.626	0.844	0.539	1.341	0.109	3.214	1.168	0.786052
A6NLU5	V-set and transmembrane domain-containing protein 2B OS=Homo sapiens OX=9606 GN=VSTM2B PE=3 SV=2	VSTM2B	5	1	3	1	30.3
Q9H7P6	Multivesicular body subunit 12B OS=Homo sapiens OX=9606 GN=MVB12B PE=1 SV=2	MVB12B	3	1	4	1	35.6	2.2485e+06							2.39223e+06	1.41096e+06
Q9Y266	Nuclear migration protein nudC OS=Homo sapiens OX=9606 GN=NUDC PE=1 SV=1	NUDC	5	2	3	2	38.2	1.34205e+06		237571	450878	529449	3.29508e+06	547403		319059	764123		2.45134e+06	1.15		0.33	0.638	0.827	2.332	0.643		0.424	0.775		2.041	0.983	0.747745
P09874	Poly [ADP-ribose] polymerase 1 OS=Homo sapiens OX=9606 GN=PARP1 PE=1 SV=4	PARP1	5	5	5	5	113	5.1472e+06	200540	945731		1.68237e+06	3.78812e+06			852149		835812	3.58899e+06	2.286	0.176	0.681		1.362	1.39			0.587		0.635	1.549	0.814	0.409115
Q9BQR3	Serine protease 27 OS=Homo sapiens OX=9606 GN=PRSS27 PE=1 SV=1	PRSS27	3	1	1	1	31.9
Q9P258	Protein RCC2 OS=Homo sapiens OX=9606 GN=RCC2 PE=1 SV=2	RCC2	1	1	1	1	56	1.34658e+06			272426				450240	394609	255123
P50990	T-complex protein 1 subunit theta OS=Homo sapiens OX=9606 GN=CCT8 PE=1 SV=4	CCT8	9	4	4	4	59.6	5.79297e+06	2.16619e+06	796586		1.92943e+06			2.96433e+06	2.03913e+06	2.05695e+06	1.47505e+06		2.281	1.684	0.509		1.384			2.007	1.245	0.959	0.993		1.452	0.560825
O60701	UDP-glucose 6-dehydrogenase OS=Homo sapiens OX=9606 GN=UGDH PE=1 SV=1	UGDH	4	1	1	1	55					3.05922e+06	617007				495305	3.23925e+06	948144
A0A494C0B4	UV excision repair protein RAD23 homolog A OS=Homo sapiens OX=9606 GN=RAD23A PE=1 SV=1	RAD23A	9	3	15	1	30.5		157411				747759	329171				108830	660011
A0A2U3TZL5	CD59 glycoprotein (Fragment) OS=Homo sapiens OX=9606 GN=CD59 PE=1 SV=1	CD59	20	3	45	3	13.3	1.05616e+07	4.37628e+06	3.22183e+06	9.70767e+06	6.67955e+06	1.94768e+07	8.08227e+06	6.06978e+06	5.59033e+06	8.66164e+06	3.22897e+06	8.95274e+06	1.267	1.037	0.627	1.925	1.461	1.931	1.33	1.253	1.04	1.231	0.662	1.044	0.925	0.413827
B1AHF3	NADH-cytochrome b5 reductase 3 (Fragment) OS=Homo sapiens OX=9606 GN=CYB5R3 PE=1 SV=1	CYB5R3	9	1	1	1	16.7	1.5827e+06		1.00055e+06				589681			1.94439e+06
H7C2Y5	DnaJ_C domain-containing protein (Fragment) OS=Homo sapiens OX=9606 PE=1 SV=8	--	14	1	1	1	19.2	320809
E7EUC7	UTP--glucose-1-phosphate uridylyltransferase OS=Homo sapiens OX=9606 GN=UGP2 PE=1 SV=1	UGP2	3	1	1	1	57.8
A0A7I2V3I2	Eukaryotic translation initiation factor 3 subunit E OS=Homo sapiens OX=9606 GN=EIF3E PE=1 SV=1	EIF3E	2	1	1	1	46.7	630895					445108
J3KTD3	60S ribosomal protein L36 (Fragment) OS=Homo sapiens OX=9606 GN=RPL36 PE=1 SV=1	RPL36	13	1	1	1	7.6	2.27625e+06					228404
F6SYF8	Dickkopf-related protein 3 OS=Homo sapiens OX=9606 GN=DKK3 PE=1 SV=1	DKK3	13	3	6	3	39.9	306868		1.30794e+06		143058	1.12324e+07	3.54222e+06	689790	364418	835536	226296	7.04134e+06	0.113		0.781		0.096	3.417	1.789	0.437	0.208	0.364	0.142	2.52	4.579	0.690059
A0A5F9ZHM4	L-lactate dehydrogenase OS=Homo sapiens OX=9606 GN=LDHB PE=1 SV=1	LDHB	26	8	53	7	37.4	2.18087e+07	3.39935e+06	1.25159e+07	7.65105e+06	7.36617e+06	9.79624e+06	5.56249e+06	6.33297e+06	1.84125e+07	6.55434e+06	4.73459e+06	5.0769e+06	2.267	0.698	2.111	1.314	1.395	0.841	0.793	1.132	2.967	0.807	0.841	0.513	0.867	0.283944
J3KT73	60S ribosomal protein L38 OS=Homo sapiens OX=9606 GN=RPL38 PE=1 SV=1	RPL38	34	2	2	2	7.6	3.89924e+06				208509				256377				2.535				0.247				0.258
H7C2W9	60S ribosomal protein L31 (Fragment) OS=Homo sapiens OX=9606 GN=RPL31 PE=1 SV=1	RPL31	8	1	3	1	12.8	367754							4304.4		31575
A0A075B7F1	Immunoglobulin heavy variable 3/OR16-8 (non-functional) (Fragment) OS=Homo sapiens OX=9606 GN=IGHV3OR16-8 PE=1 SV=1	IGHV3OR16-8	33	7	240	1	12.7	4.23525e+06	1.059e+07	5.55939e+06	6.70637e+06	1.16907e+07	1.77519e+06	5.18048e+06	9.79327e+06	6.20733e+06	5.13181e+06	1.00138e+07	4.6836e+06
A0A3B3ISQ4	Epidermal growth factor receptor kinase substrate 8-like protein 2 OS=Homo sapiens OX=9606 GN=EPS8L2 PE=1 SV=1	EPS8L2	3	3	4	3	88	148954	64252.5	154681	204874		176628		112029	308833	870193			0.552	0.471	0.931	1.256		0.541		0.715	1.776	3.823			2.156	0.0712361
A8MTF8	Protein FAM3B OS=Homo sapiens OX=9606 GN=FAM3B PE=1 SV=2	FAM3B	7	2	7	2	28.3	857130					3.68629e+06	1.2552e+06	661277	571185			7.33883e+06	0.339					1.203	0.68	0.449	0.35			2.817	2.174	0.0634782
A0A087WWU8	Tropomyosin alpha-3 chain OS=Homo sapiens OX=9606 GN=TPM3 PE=1 SV=1	TPM3	27	6	17	5	26.4	1.59912e+07			663611	551251	1.85154e+06	253770		1.0387e+06	5.0227e+06	369546	495544	5.188			0.356	0.326	0.496	0.113		0.522	1.93	0.205	0.156	1.597	0.469488
A0A7I2V2R5	Dipeptidyl peptidase 4 OS=Homo sapiens OX=9606 GN=DPP4 PE=1 SV=1	DPP4	37	25	206	25	84.5	7.06699e+07	1.57199e+07	1.00394e+08	2.2304e+08	3.36998e+07	6.42551e+07	3.99982e+07	7.65739e+07	1.14094e+08	4.58596e+07	3.45514e+07	3.72486e+07	0.937	0.412	2.16	4.887	0.814	0.704	0.727	1.746	2.345	0.72	0.783	0.48	1.315	0.702879
G3V279	Enhancer of rudimentary homolog OS=Homo sapiens OX=9606 GN=ERH PE=1 SV=1	ERH	17	1	1	1	8.2	3.6259e+06					552584						394290
K7ENR6	Proteasome assembly chaperone 2 OS=Homo sapiens OX=9606 GN=PSMG2 PE=1 SV=1	PSMG2	3	1	3	1	26.7	4.67011e+06	1.98889e+06	2.44264e+06	1.03414e+06	1.71894e+06	1.18607e+07	5.55574e+06	916565		1.12911e+06	4.34388e+06	1.10851e+07
A0A0G2JRQ6	Ig-like domain-containing protein (Fragment) OS=Homo sapiens OX=9606 PE=1 SV=4	--	38	10	371	1	12.7	1.82741e+06	848301	1.91614e+06	6.50107e+06	512462	3.77244e+06	1.14885e+06	1.74474e+06	3.08593e+06	1.10504e+06	921882	2.16599e+06
B7ZBH1	Eukaryotic translation initiation factor 6 (Fragment) OS=Homo sapiens OX=9606 GN=EIF6 PE=1 SV=1	EIF6	17	1	3	1	11.8	587100			356825
H9KV31	Neural cell adhesion molecule 2 OS=Homo sapiens OX=9606 GN=NCAM2 PE=1 SV=2	NCAM2	2	2	6	2	91.1	91323.2	646126		535139	898418	757024	181393		675661	273435			0.17	2.379		1.649	3.053	1.166	0.464		1.953	0.604			1.548	0.999916
C9JIZ6	Prosaposin OS=Homo sapiens OX=9606 GN=PSAP PE=1 SV=2	PSAP	9	8	75	8	58.4	4.24434e+07	1.82031e+07	2.29666e+07	3.70044e+07	2.38864e+07	3.9675e+07	1.70912e+07	2.49592e+07	2.4865e+07	3.19973e+07	1.95155e+07	4.32615e+07	1.393	1.18	1.223	2.007	1.429	1.076	0.769	1.409	1.265	1.244	1.095	1.38	0.908	0.354533
A0A5K1VW56	ATPase family AAA domain-containing protein 3B OS=Homo sapiens OX=9606 GN=ATAD3B PE=1 SV=1	ATAD3B	3	1	1	1	32.5	275637										54389.2
A0A7I2V3T0	Tetraspanin OS=Homo sapiens OX=9606 GN=CD9 PE=1 SV=1	CD9	8	3	7	3	24		525915	295245	1.12741e+06				772429	1.00929e+06	992168	56211.5			1.439	0.664	2.582				1.841	2.168	1.628	0.133		1.725	0.567799
A0A590UK80	Uncharacterized protein (Fragment) OS=Homo sapiens OX=9606 PE=3 SV=1	--	1	1	1	1	121	940669
K7ER16	Phenylalanine--tRNA ligase alpha subunit OS=Homo sapiens OX=9606 GN=FARSA PE=1 SV=1	FARSA	6	1	1	1	26	240897
A0A075B7B8	Immunoglobulin heavy variable 3/OR16-12 (non-functional) (Fragment) OS=Homo sapiens OX=9606 GN=IGHV3OR16-12 PE=1 SV=1	IGHV3OR16-12	19	2	113	1	12.9	2.39047e+08	1.44467e+08	1.25124e+08	1.59884e+08	1.77752e+08	9.22365e+07	2.34386e+08	2.07264e+08	1.31066e+08	1.65559e+08	1.8226e+08	1.23781e+08
A0A0B4J2B8	Immunoglobulin heavy variable 1/OR15-9 (non-functional) (Fragment) OS=Homo sapiens OX=9606 GN=IGHV1OR15-9 PE=1 SV=1	IGHV1OR15-9	19	2	21	1	12.9	1.13627e+07	3.77731e+06		3.24204e+06	5.97034e+06	3.41289e+07	1.77761e+07	2.16288e+06	3.59238e+06	3.5702e+06	1.33323e+07	2.37071e+07
A0A7I2YQK5	Inosine-5'-monophosphate dehydrogenase OS=Homo sapiens OX=9606 GN=IMPDH2 PE=1 SV=1	IMPDH2	12	4	4	4	55.5	2.73817e+06					213569		218667		342846		1.12568e+06	2.792					0.18		0.383		0.414		1.115	6.194
A0A0A0MTB9	Retinol-binding protein 1 OS=Homo sapiens OX=9606 GN=RBP1 PE=1 SV=1	RBP1	10	1	1	1	10.6
K7EMH1	60S ribosomal protein L22 (Fragment) OS=Homo sapiens OX=9606 GN=RPL22 PE=1 SV=1	RPL22	27	2	2	2	10.4	3.39508e+07	3.97866e+07	3.51649e+07	3.54898e+07	1.0447e+07	1.60367e+07	1.70735e+07	3.12548e+07	3.18057e+07	2.40017e+07	2.2242e+07	1.30729e+07	1.242	2.874	2.087	2.145	0.696	0.485	0.857	1.966	1.803	1.04	1.391	0.465	0.947	0.446566
G3V4T2	Polyadenylate-binding protein 2 OS=Homo sapiens OX=9606 GN=PABPN1 PE=1 SV=1	PABPN1	20	2	2	2	20.2	841923												0.946
B1AJY5	26S proteasome non-ATPase regulatory subunit 10 OS=Homo sapiens OX=9606 GN=PSMD10 PE=1 SV=1	PSMD10	10	2	13	2	20.2	5.76741e+06	2.99261e+06	3.41122e+06	2.64241e+06	3.91606e+06	2.18892e+06	6.15607e+06	2.88457e+06	3.01205e+06	2.723e+06	4.16142e+06	2.2785e+06	1.554	1.592	1.491	1.176	1.923	0.487	2.275	1.337	1.258	0.869	1.917	0.597	1.018	0.922145
F8WDW9	Endothelial cell-selective adhesion molecule OS=Homo sapiens OX=9606 GN=ESAM PE=1 SV=1	ESAM	21	5	46	5	26.7	2.24854e+07	2.24248e+07	2.35797e+07	1.97151e+07	1.69516e+07	9.01553e+07	2.50143e+07	2.35541e+07	2.21432e+07	3.21403e+07	1.51318e+07	5.64289e+07	0.69	1.359	1.175	1	0.948	2.287	1.053	1.244	1.054	1.169	0.794	1.684	1.014	0.880921
E9PCA1	CCT-epsilon OS=Homo sapiens OX=9606 GN=CCT5 PE=1 SV=1	CCT5	7	3	3	3	57.1	1.5692e+06									166712			1.71									0.215
D6REE5	Receptor of-activated protein C kinase 1 (Fragment) OS=Homo sapiens OX=9606 GN=RACK1 PE=1 SV=1	RACK1	5	3	4	3	34.9	6.00656e+06		223492			109346				1.50674e+06	95171.6		3.577		0.216			0.054				1.063	0.097
E9PG40	Amyloid-beta A4 protein OS=Homo sapiens OX=9606 GN=APP PE=1 SV=1	APP	3	2	3	2	80.8	370402	148285	191334	115103	236032	3.90986e+06			1.17695e+06	596790	661993	2.16042e+06	0.366	0.29	0.307	0.188	0.425	3.194			1.804	0.699	1.119	2.076	3.219	0.152587
H7C0L5	Inter-alpha-trypsin inhibitor heavy chain H4 (Fragment) OS=Homo sapiens OX=9606 GN=ITIH4 PE=1 SV=1	ITIH4	51	45	1035	1	80	2.30143e+07	2.21095e+07	1.81133e+07	1.23103e+07	2.53e+07	1.30261e+07	2.49491e+07	1.50598e+07	1.02008e+07	1.02892e+07	2.32743e+07	9.23901e+06
F5H810	Noelin (Fragment) OS=Homo sapiens OX=9606 GN=OLFM1 PE=1 SV=1	OLFM1	7	1	1	1	24.2
F8WF14	Carboxylic ester hydrolase OS=Homo sapiens OX=9606 GN=BCHE PE=1 SV=1	BCHE	3	2	7	2	63.4	688985	1.28832e+06	319315	1.14934e+06		253389	309647	1.60317e+06	1.14981e+06	918344		565728	0.79	2.918	0.594	2.179		0.24	0.487	3.163	2.045	1.248		0.631	1.669	0.536302
H0YJ56	Protein NDRG2 (Fragment) OS=Homo sapiens OX=9606 GN=NDRG2 PE=1 SV=1	NDRG2	11	1	4	1	15.4	2.79383e+06	1.28941e+06				1.46819e+06	544263		2.41561e+06	1321522		1.57185e+06
E9PC62	CUGBP Elav-like family member 2 OS=Homo sapiens OX=9606 GN=CELF2 PE=1 SV=1	CELF2	3	1	1	1	55.7
A0A2R8Y4K2	Crystallin, lambda 1, isoform CRA_c OS=Homo sapiens OX=9606 GN=CRYL1 PE=1 SV=1	CRYL1	5	1	1	1	29.5	419554	169963	337911	491784	857065	461658	494550			307066	868192	433440
F5GZS6	4F2 cell-surface antigen heavy chain OS=Homo sapiens OX=9606 GN=SLC3A2 PE=1 SV=1	SLC3A2	9	4	16	4	64.8	4.1434e+06	3.65569e+06	4.83555e+06	7.93578e+06	3.79587e+06	3.29949e+06	1.6088e+06	4.06864e+06	5.79689e+06	6179804	2.94853e+06	1.49627e+06	0.945	1.647	1.79	2.991	1.578	0.622	0.503	1.596	2.05	1.67	1.15	0.332	0.745	0.052415
F8W9U3	Protein ABHD14B OS=Homo sapiens OX=9606 GN=ABHD14B PE=1 SV=1	ABHD14B	36	5	42	5	22.4	2.00045e+07	1.08136e+07	1.60804e+07	2.63067e+07	7.24512e+06	1.70997e+07	1.2888e+07	2.01233e+07	1.70963e+07	21707690	7.14031e+06	1.39542e+07	1.192	1.273	1.555	2.591	0.787	0.842	1.054	2.063	1.579	1.532	0.728	0.808	0.999	0.746854
A0A087X0R6	Sorting nexin-12 OS=Homo sapiens OX=9606 GN=SNX12 PE=1 SV=1	SNX12	4	1	2	1	19.8						390636						417604
I3L3I9	Aldehyde dehydrogenase, dimeric NADP-preferring OS=Homo sapiens OX=9606 GN=ALDH3A1 PE=1 SV=1	ALDH3A1	5	3	6	2	41.8
A0A286YFJ8	Immunoglobulin heavy constant gamma 4 (Fragment) OS=Homo sapiens OX=9606 GN=IGHG4 PE=1 SV=1	IGHG4	69	63	5988	14	43.8	3.85369e+09	2.16001e+09	2.2215e+09	2.74839e+09	2.29738e+09	3.24393e+09	5.3924e+09	2.33957e+09	2.48135e+09	3.30128e+09	2.70853e+09	3.65375e+09	1.202	1.33	1.124	1.416	1.306	0.836	2.306	1.255	1.199	1.219	1.444	1.107	1.203	0.261368
A0A494C165	Xaa-Pro dipeptidase (Fragment) OS=Homo sapiens OX=9606 GN=PEPD PE=1 SV=1	PEPD	25	9	42	9	57.7	1.02758e+07	3.9077e+06	3.82633e+06	4.25348e+06	8.22233e+06	1.30798e+06	3.14976e+06	5.93447e+06	8.94311e+06	2.92608e+06	7.74689e+06	1.40934e+06	1.884	1.415	1.138	1.289	2.748	0.198	0.792	1.872	2.542	0.636	2.429	0.251	1.104	0.819011
A6NLN1	Polypyrimidine tract-binding protein 1 OS=Homo sapiens OX=9606 GN=PTBP1 PE=1 SV=4	PTBP1	11	4	4	4	56.5	1.08069e+07	6.0958e+06	4.78568e+06		4.3693e+06	2.77395e+06	3.53298e+06		4.96835e+06			3.85398e+06	1.985	2.212	1.427		1.463	0.421	0.89		1.415			0.688	1.025	0.803926
A0A0G2JMM7	Osteoclast-associated immunoglobulin-like receptor OS=Homo sapiens OX=9606 GN=OSCAR PE=1 SV=1	OSCAR	8	1	4	1	29.3				1.16989e+06		2.45159e+06				1.75613e+06		282452
A0A0A6YYA0	Protein TMED7-TICAM2 OS=Homo sapiens OX=9606 GN=TMED7-TICAM2 PE=3 SV=1	TMED7-TICAM2	13	2	4	2	21.2	3.47674e+06	2.18041e+06		645615		4.75555e+06	2.32145e+06	795425	1.73249e+06	2.03195e+06		4.66757e+06	1.309	1.621		0.402		1.48	1.199	0.515	1.011	0.906		1.708	1.16	0.874919
F5H0C8	2-phospho-D-glycerate hydro-lyase OS=Homo sapiens OX=9606 GN=ENO2 PE=1 SV=1	ENO2	15	4	41	1	34.7	2.72812e+07		5.49554e+06		5.51146e+06	3.18787e+06			7.33117e+06	12268532
B5MCH7	Basic leucine zipper and W2 domain-containing protein 2 OS=Homo sapiens OX=9606 GN=BZW2 PE=1 SV=1	BZW2	4	2	2	1	39.4
A0A5H1ZRQ7	Immunoglobulin lambda constant 7 (Fragment) OS=Homo sapiens OX=9606 GN=IGLC7 PE=1 SV=1	IGLC7	62	18	684	1	11.3	8.16188e+07	3.46824e+06	6.58315e+06	1.4123e+07	1.1197e+07	2.91533e+07	6.55526e+07	2.63895e+06	7.09476e+06	14267814	1.02965e+07	1.78944e+07
D6RE86	Ceruloplasmin (Fragment) OS=Homo sapiens OX=9606 GN=CP PE=1 SV=8	CP	43	11	236	1	20.7	260718						278398		213782	230408	233060
H7C0M1	H/ACA ribonucleoprotein complex subunit DKC1 (Fragment) OS=Homo sapiens OX=9606 GN=DKC1 PE=1 SV=1	DKC1	3	1	1	1	25.8	181710		265591			162380			232575	470444		110438
D6RA31	Alpha-synuclein (Fragment) OS=Homo sapiens OX=9606 GN=SNCA PE=1 SV=8	SNCA	14	1	2	1	6.8
E7EWC2	Ras GTPase-activating-like protein IQGAP2 (Fragment) OS=Homo sapiens OX=9606 GN=IQGAP2 PE=1 SV=1	IQGAP2	1	1	1	1	160.2	686253							712556			488190
A0A087WWD4	Neural cell adhesion molecule 1 OS=Homo sapiens OX=9606 GN=NCAM1 PE=1 SV=1	NCAM1	9	7	23	7	97.3	4.4713e+06	2.72397e+06	657412	1.77296e+06	1.96216e+06	1.01011e+07	4.15776e+06	687894	942366	313746	1.77871e+06	5.93397e+06	1.429	1.72	0.341	0.937	1.143	2.668	1.823	0.378	0.467	0.119	0.972	1.844	0.756	0.197813
A6NP24	Quinone oxidoreductase (Fragment) OS=Homo sapiens OX=9606 GN=CRYZ PE=1 SV=1	CRYZ	11	3	3	3	26	8.27904e+09		662011	6.34105e+09		587954		6.30575e+09	5.75401e+09				1.761		0	2.229		0		2.307	1.897
A0A140T9U0	HLA class I histocompatibility antigen, C alpha chain OS=Homo sapiens OX=9606 GN=HLA-C PE=1 SV=1	HLA-C	19	7	26	1	41.4	862763							1.20527e+06
A6XND1	Insulin-like growth factor-binding protein 3 OS=Homo sapiens OX=9606 GN=IGFBP3 PE=1 SV=1	IGFBP3	26	5	20	5	29		848125	1.33516e+06	3.526e+06	6.18856e+06	1.41216e+07	4.37257e+06	1.73321e+06	2.28217e+06	3.28633e+06	9.60603e+06	7.78082e+06		0.316	0.409	1.101	2.131	2.204	1.133	0.563	0.668	0.735	3.102	1.429	1.237	0.615251
F8WCM8	Ephrin type-B receptor 6 OS=Homo sapiens OX=9606 GN=EPHB6 PE=1 SV=2	EPHB6	2	1	9	1	110.7	1.22648e+06	659056	565371	1.06549e+06	522643	829141	574050	760238	686484	1.0189e+06	439958	473568
G8JLG2	Corneodesmosin OS=Homo sapiens OX=9606 GN=CDSN PE=1 SV=1	CDSN	5	2	19	2	51.6	2.1618e+06	1.27258e+06	1.10619e+06		578938	1.16457e+07	4.92205e+06	747430	1.33253e+06		723946	4.54251e+06	0.704	0.819	0.585		0.344	3.135	2.2	0.419	0.673		0.403	1.438	1.283	0.994922
C9J2Y9	DNA-directed RNA polymerase subunit beta OS=Homo sapiens OX=9606 GN=POLR2B PE=1 SV=2	POLR2B	2	1	1	1	133
A0A2R8Y4M5	Collagen alpha-1(XI) chain OS=Homo sapiens OX=9606 GN=COL11A1 PE=1 SV=1	COL11A1	2	1	1	1	77		1.31085e+06		424368		698432	438510	1.30711e+06				1.53859e+06
A0A1W2PRU0	Alpha-endosulfine OS=Homo sapiens OX=9606 GN=ENSA PE=1 SV=1	ENSA	13	2	2	2	13.1	1.83395e+06	4.29189e+06	7.79622e+06	6.10607e+06	1.08729e+07	4.23146e+07	1.46997e+07	4.1619e+06	3.16345e+06	19982620	1.9872e+07	3.57662e+07	0.122	0.563	0.84	0.67	1.316	2.323	1.339	0.476	0.326	1.573	2.257	2.309	2.878	0.383145
K7ERU7	Telomerase RNA component-interacting RNase OS=Homo sapiens OX=9606 GN=TRIR PE=1 SV=1	TRIR	18	1	1	1	13.4
G3V2S9	SRA stem-loop-interacting RNA-binding protein, mitochondrial OS=Homo sapiens OX=9606 GN=SLIRP PE=1 SV=1	SLIRP	11	1	1	1	13.9
A0A7I2V2D2	Plasma protease C1 inhibitor OS=Homo sapiens OX=9606 GN=SERPING1 PE=1 SV=1	SERPING1	43	24	659	24	53.2	6.18717e+08	5.87046e+08	1.10588e+09	9.68128e+08	1.47632e+09	2.15105e+09	1.0599e+09	4.8287e+08	6.07383e+08	1.10303e+09	1.22297e+09	1.66468e+09	0.538	1.008	1.561	1.392	2.341	1.546	1.265	0.723	0.819	1.137	1.819	1.408	1.016	0.613859
A0A2R8YDT1	Glutamine synthetase OS=Homo sapiens OX=9606 GN=GLUL PE=1 SV=1	GLUL	16	7	12	7	57.1	3.27824e+06		203284	2.03859e+06	1.07325e+06	322360		128787		4.06242e+07	897302		0.511		0.051	0.525	0.305	0.042		0.035		7.498	0.239		7.533	0.55822
A0A286YFM8	D-3-phosphoglycerate dehydrogenase (Fragment) OS=Homo sapiens OX=9606 GN=PHGDH PE=1 SV=1	PHGDH	11	2	2	2	25.6	1.75268e+06						1.1879e+06			1.6456e+06			1.084						1.008			1.206			0.93
A0A0A6YYC0	Ribosomal protein S6 kinase alpha-4 (Fragment) OS=Homo sapiens OX=9606 GN=RPS6KA4 PE=1 SV=5	RPS6KA4	2	2	17	2	78.3	4.69959e+06	2.21526e+06	2.90526e+06	899030	3.80179e+06	2.84832e+07	7.02786e+06	2.31188e+06	3.13856e+06	872332	3.85872e+06	2.17953e+07	0.65	0.605	0.652	0.206	0.959	3.257	1.334	0.55	0.673	0.143	0.913	2.932	1.09	0.885388
C9JXA5	Guanine nucleotide-binding protein G(I)/G(S)/G(T) subunit beta-2 (Fragment) OS=Homo sapiens OX=9606 GN=GNB2 PE=1 SV=1	GNB2	4	1	2	1	27.5			344930	402540	192584				334980	423425	220519
A8MU27	Small ubiquitin-related modifier 3 OS=Homo sapiens OX=9606 GN=SUMO3 PE=1 SV=1	SUMO3	8	1	10	1	16.9	1.28739e+07	2.96945e+06	3.08644e+06		3.12483e+06	2.24837e+07	4.37527e+06	2.91232e+06	2.52907e+06	2.34622e+06	2.43092e+06	1.40206e+07
K7EQJ5	40S ribosomal protein S15 OS=Homo sapiens OX=9606 GN=RPS15 PE=1 SV=2	RPS15	16	2	2	2	16.6	2.2416e+06												0.946
A2AEA2	HLA class I histocompatibility antigen, C alpha chain OS=Homo sapiens OX=9606 GN=HLA-C PE=1 SV=2	HLA-C	24	9	31	1	41.3
A0A7P0T9E5	Serine/threonine-protein kinase VRK1 OS=Homo sapiens OX=9606 GN=VRK1 PE=4 SV=1	VRK1	4	1	1	1	45.3	539141					399063
A0A2R8Y6J3	60S ribosomal protein L5 (Fragment) OS=Homo sapiens OX=9606 GN=RPL5 PE=1 SV=1	RPL5	8	2	2	2	27	1.6812e+06											132209	1.754											0.134
F5H7Z2	Microfibrillar-associated protein 5 OS=Homo sapiens OX=9606 GN=MFAP5 PE=1 SV=1	MFAP5	7	1	6	1	14.4
H3BN98	40S ribosomal protein S15a (Fragment) OS=Homo sapiens OX=9606 PE=3 SV=2	--	16	4	5	4	27.2	1.22117e+07		817810		1.01226e+06					1.74122e+06	1.23477e+06	620296	3.929		0.427		0.594					0.664	0.679	0.194	1.143
Q5SXN9	Alpha-MPP (Fragment) OS=Homo sapiens OX=9606 GN=PMPCA PE=1 SV=1	PMPCA	3	1	1	1	29.5	322975		152465				497757	273239		372433
E9PBS1	AIR carboxylase (Fragment) OS=Homo sapiens OX=9606 GN=PAICS PE=1 SV=1	PAICS	7	3	3	3	45.6	6.94394e+06									475974			1.77									0.144
A0A0A0MQW3	Serpin B13 OS=Homo sapiens OX=9606 GN=SERPINB13 PE=1 SV=1	SERPINB13	23	9	14	1	45.3	1.16317e+07	1.12017e+07		9.10327e+06	1.43357e+07	1.05982e+07	8.85412e+06	8.18312e+06	4.48153e+06	4.68031e+07	1.03655e+07	9.23206e+06
I3L1M3	Uromodulin (Fragment) OS=Homo sapiens OX=9606 GN=UMOD PE=1 SV=1	UMOD	21	1	7	1	13	2.09436e+06			7.9764e+06		4.05356e+06	1.71378e+06	5.5081e+06	2.10352e+06	12186008	2.61509e+06
E9PHY0	Lysosomal acid phosphatase OS=Homo sapiens OX=9606 GN=ACP2 PE=1 SV=1	ACP2	14	4	19	4	41	4.69462e+06	490454	3.46696e+06	6.47669e+06	710541	1.8082e+06	1.14685e+06	3.44836e+06	5.15645e+06	1.33569e+06	452954	974984	1.767	0.364	2.117	4.028	0.487	0.562	0.592	2.232	3.008	0.595	0.291	0.357	1.545	0.588747
F8W8J5	V-set and transmembrane domain-containing protein 2A OS=Homo sapiens OX=9606 GN=VSTM2A PE=1 SV=1	VSTM2A	13	1	2	1	26.4						3.31764e+06						3.69346e+06
J3KQG3	EPH receptor A10, isoform CRA_b OS=Homo sapiens OX=9606 GN=EPHA10 PE=1 SV=1	EPHA10	2	1	1	1	110.3
F8W6I7	Helix-destabilizing protein OS=Homo sapiens OX=9606 GN=HNRNPA1 PE=1 SV=2	HNRNPA1	38	11	22	9	33.1	3.36999e+07	400281	135927		13286.4	2.3893e+06			199230	2.09393e+06		2.55445e+06	6.147	0.144	0.04		0.004	0.36			0.056	0.452		0.453	1.329	0.11855
A0A7P0Z4D3	Transportin-1 OS=Homo sapiens OX=9606 GN=TNPO1 PE=4 SV=1	TNPO1	1	1	2	1	99	509961			78810.7	63423.9		61785.7	117739	93155.4	168819	62274.4	37215.1
A0A087WW65	ATP-binding cassette sub-family B member 7, mitochondrial OS=Homo sapiens OX=9606 GN=ABCB7 PE=1 SV=1	ABCB7	1	1	3	1	78.2	944823			1.11602e+06		1.6492e+06	593595				863901	1.24842e+06
Q5T5C7	Seryl-tRNA synthetase OS=Homo sapiens OX=9606 GN=SARS1 PE=1 SV=1	SARS1	2	1	1	1	61.3	495927									477296
A0A0A0MR02	Outer mitochondrial membrane protein porin 2 (Fragment) OS=Homo sapiens OX=9606 GN=VDAC2 PE=1 SV=1	VDAC2	14	3	4	3	30.3	4.11565e+06			153088	877169		1.03036e+06	619656	1.00511e+06	985074	1.3944e+06	322026	3.336			0.205	1.296		1.146	0.864	1.263	0.946	1.932	0.254	2.15	0.739736
F5GX62	Ras-related protein Rap-1b (Fragment) OS=Homo sapiens OX=9606 GN=RAP1B PE=1 SV=1	RAP1B	14	2	5	2	15.7	2.96789e+06	925118	3.45348e+06	1.98135e+06	1.06868e+06	1.78985e+06	4.31357e+06		344897	3.6847e+06			1.231	0.758	2.324	1.358	0.808	0.613	2.454		0.222	1.81			1.141	0.678771
C9J0E4	Cystatin-A OS=Homo sapiens OX=9606 GN=CSTA PE=1 SV=1	CSTA	89	8	63	8	7.1	7.9147e+06	3.35685e+06	3.93337e+06	3.13614e+07	6.99531e+06	1.48457e+07	6.60623e+06	6.35612e+06	4.23262e+06	5.46802e+07	8.63267e+06	9.54809e+06	0.567	0.475	0.457	3.713	0.913	0.879	0.649	0.783	0.47	4.64	1.057	0.665	1.164	0.280542
A0A7P0T973	Nicotinamide phosphoribosyltransferase OS=Homo sapiens OX=9606 GN=NAMPT PE=4 SV=1	NAMPT	9	3	3	3	50.4	715512					1.04359e+06	521635	386981	219881	627160	511342	623458	1.164					1.403	1.165	1.083	0.555	1.209	1.423	0.986	0.852	0.50155
A0A087WW49	Ig-like domain-containing protein (Fragment) OS=Homo sapiens OX=9606 PE=4 SV=1	--	37	6	132	1	12.9												689054
E9PHT9	Annexin OS=Homo sapiens OX=9606 GN=ANXA5 PE=1 SV=1	ANXA5	10	2	14	2	18.2	556119	924482	1.80006e+06	1.17179e+06	589451	2.97642e+06	575167	2.00247e+06	3.21009e+06	2.68064e+06	742493	1.97992e+06	0.329	1.079	1.726	1.144	0.635	1.453	0.466	2.035	2.941	1.876	0.75	1.137	1.435	0.0580549
C9JYX9	Procollagen C-endopeptidase enhancer 2 OS=Homo sapiens OX=9606 GN=PCOLCE2 PE=1 SV=1	PCOLCE2	4	1	4	1	33.8						7.64809e+06						1.03284e+07
B0QZK4	Heterochromatin protein 1-binding protein 3 (Fragment) OS=Homo sapiens OX=9606 GN=HP1BP3 PE=1 SV=1	HP1BP3	8	2	2	2	28.5	4.55506e+06			457130		220287	2.12965e+06		153193	554109		163878	3.663			0.608		0.146	2.349		0.191	0.528		0.128	0.795	0.145421
A0A5H1ZRS9	Immunoglobulin kappa variable 2D-29 OS=Homo sapiens OX=9606 GN=IGKV2D-29 PE=1 SV=1	IGKV2D-29	65	10	242	3	11.2	6.32369e+08	5.30342e+08	4.14544e+08	5.60849e+08	6.30852e+08	9.69625e+08	6.14153e+08	5.29617e+08	4.54457e+08	6.33106e+08	6.19691e+08	7.61018e+08	0.976	1.617	1.039	1.431	1.775	1.237	1.301	1.407	1.088	1.158	1.636	1.142	0.984	0.697198
A0A1W2PRS4	Junctional adhesion molecule-like OS=Homo sapiens OX=9606 GN=JAML PE=1 SV=1	JAML	13	3	7	3	25.3	910156	594822		2.15464e+06	889417	1.03274e+07		1.66034e+06	1.13563e+06	1.28634e+06	1.43468e+06	4.12818e+06	0.351	0.453		1.374	0.625	3.292		1.102	0.679	0.588	0.946	1.548	1.211	0.873022
E9PNP3	Mth938 domain-containing protein OS=Homo sapiens OX=9606 GN=AAMDC PE=1 SV=1	AAMDC	11	1	2	1	15.6	164211	78931.2				632312						646974
Q5W0G0	Kin of IRRE-like protein 1 OS=Homo sapiens OX=9606 GN=KIRREL1 PE=1 SV=1	KIRREL1	2	1	1	1	63.1
H7BYY1	Tropomyosin 1 (Alpha), isoform CRA_m OS=Homo sapiens OX=9606 GN=TPM1 PE=1 SV=1	TPM1	7	2	9	1	28.7										324821		367406
B4DY08	Heterogeneous nuclear ribonucleoproteins C1/C2 OS=Homo sapiens OX=9606 GN=HNRNPC PE=1 SV=1	HNRNPC	26	7	7	7	32	2.36515e+07	8.68492e+06	7.31542e+06	7.05262e+06	8.29249e+06	9.61428e+06	8.22683e+06	8.16442e+06	7.75225e+06	9.01084e+06	8.35699e+06	1.10209e+07	2.292	1.662	1.15	1.129	1.464	0.77	1.093	1.361	1.164	1.034	1.384	1.038	0.92	0.399587
C9JF17	Apolipoprotein D (Fragment) OS=Homo sapiens OX=9606 GN=APOD PE=1 SV=1	APOD	30	6	102	6	24.1	1.41752e+08	5.29726e+07	6.35721e+07	8.02246e+07	4.99526e+07	3.26132e+07	1.05195e+08	5.82717e+07	7.98891e+07	3.07451e+07	4.94174e+07	1.76106e+07	2.111	1.558	1.536	1.974	1.356	0.401	2.149	1.493	1.844	0.542	1.258	0.255	0.836	0.26412
A0A6Q8PGB1	Centrosomal protein of 290 kDa OS=Homo sapiens OX=9606 GN=CEP290 PE=1 SV=1	CEP290	0	1	1	1	323						1.49316e+06						1.92084e+06
E9PEK4	Macrophage colony-stimulating factor 1 receptor OS=Homo sapiens OX=9606 GN=CSF1R PE=1 SV=1	CSF1R	5	2	24	2	74.2	1.20744e+06			3.34664e+06	712564		1.22488e+06				986759		0.764			3.498	0.821		1.063				1.067		1.345	0.0729732
H3BSA6	dCTP pyrophosphatase 1 OS=Homo sapiens OX=9606 GN=DCTPP1 PE=1 SV=1	DCTPP1	14	1	1	1	7.6	586128
A0A7P0T9F1	Cytoplasmic dynein 1 heavy chain 1 OS=Homo sapiens OX=9606 GN=DYNC1H1 PE=4 SV=1	DYNC1H1	1	4	12	4	431.5	8.08891e+06	115910	1.15383e+06	137106	1.64563e+07	3.65239e+06	3.41745e+06	518111	1.71545e+06	309814	4.06353e+06	2.18957e+06	2.196	0.062	0.508	0.062	8.141	0.819	1.272	0.242	0.722	0.1	1.886	0.578	1.409	0.947438
E9PRJ8	Tetraspanin (Fragment) OS=Homo sapiens OX=9606 GN=CD81 PE=1 SV=1	CD81	4	1	1	1	22.5	108730	87883.6	69800.6	123893				113340	216727	155843
M0R213	Alpha-soluble NSF attachment protein (Fragment) OS=Homo sapiens OX=9606 GN=NAPA PE=1 SV=1	NAPA	22	1	2	1	9.9	468723					374625				390171
A0A0B4J2B5	Immunoglobulin heavy variable 3/OR16-9 (non-functional) (Fragment) OS=Homo sapiens OX=9606 GN=IGHV3OR16-9 PE=1 SV=1	IGHV3OR16-9	61	9	378	1	10.7	6.62388e+06	5.02065e+06	4.95926e+06	3.58549e+06	1.03254e+07	7.96144e+06	1.38923e+07	6.99059e+06	5.00086e+06	4.75437e+06	9.50694e+06	1.04736e+07
A0A5S8K7D1	HLA class II histocompatibility antigen, DRB1 beta chain (Fragment) OS=Homo sapiens OX=9606 GN=HLA-DRB1 PE=1 SV=1	HLA-DRB1	8	2	5	1	29.5				832428					923456
A0A494C0G5	Agrin OS=Homo sapiens OX=9606 GN=AGRN PE=1 SV=1	AGRN	6	9	98	1	203	6.21623e+06	5.05497e+06	5.61337e+06	3.23182e+06	2.15736e+06	5.95101e+06	5.30987e+06	4.40422e+06	6.5383e+06	4.74137e+06	2.7594e+06	5.05576e+06
M0R0H5	Urokinase plasminogen activator surface receptor (Fragment) OS=Homo sapiens OX=9606 GN=PLAUR PE=1 SV=8	PLAUR	16	2	7	2	17	1.52176e+06		979028		3.22661e+06	6.8287e+06	627062		910237	745660	926651	3.97677e+06	0.656		0.685		2.536	2.433	0.371		0.608	0.381	0.683	1.667	0.602	0.102967
M0QXN5	Nuclear pore glycoprotein p62 OS=Homo sapiens OX=9606 GN=NUP62 PE=1 SV=1	NUP62	2	1	2	1	45.6
C9JIG9	Non-specific serine/threonine protein kinase OS=Homo sapiens OX=9606 GN=OXSR1 PE=1 SV=1	OXSR1	2	1	4	1	51.8			443203			1.81364e+06			261193			1.08397e+06
J3KRY3	Small nuclear ribonucleoprotein-associated protein N (Fragment) OS=Homo sapiens OX=9606 GN=SNRPN PE=4 SV=1	SNRPN	12	1	2	1	7	4.56809e+06	759239	780916	759063	2.60602e+06	2.06687e+06	1.08971e+06			1.266e+06		1.99677e+06
A2A2V1	Major prion protein (Fragment) OS=Homo sapiens OX=9606 GN=PRNP PE=1 SV=1	PRNP	25	7	78	7	27.3	3.10456e+07	1.29866e+07	9.25595e+06	7.83084e+06	9.95056e+06	8.61679e+07	1.82828e+07	1.23092e+07	6.46416e+06	6.90652e+06	1.16379e+07	5.80794e+07	1.301	1.074	0.629	0.542	0.76	2.983	1.051	0.887	0.42	0.343	0.834	2.365	0.804	0.0315494
K7EL02	Thimet oligopeptidase (Fragment) OS=Homo sapiens OX=9606 GN=THOP1 PE=1 SV=1	THOP1	7	1	1	1	29.2
F5H5X6	Probable 28S rRNA (cytosine(4447)-C(5))-methyltransferase (Fragment) OS=Homo sapiens OX=9606 GN=NOP2 PE=1 SV=1	NOP2	4	1	1	1	27.4	552089
F5GZZ9	Scavenger receptor cysteine-rich type 1 protein M130 OS=Homo sapiens OX=9606 GN=CD163 PE=1 SV=1	CD163	2	2	5	2	120.2	394095	197670	317782	140888	86255.7	511861	317465	554467	288518	235114	47358.3	393220	1.284	1.271	1.68	0.758	0.512	1.378	1.418	3.107	1.457	0.907	0.264	1.245	1.172	0.839499
A0A669KAY4	Proprotein convertase subtilisin/kexin type 9 OS=Homo sapiens OX=9606 GN=PCSK9 PE=1 SV=1	PCSK9	5	1	3	1	22.9			684478		1.79029e+06	394558	7.40148e+06					1.26944e+07
A0A0C4DGH5	Cullin-associated NEDD8-dissociated protein 1 (Fragment) OS=Homo sapiens OX=9606 GN=CAND1 PE=1 SV=1	CAND1	3	2	2	2	85.4	662018		144211			154551	132999		207901	241384	174310		2.552		0.902			0.492	0.703		1.243	1.102	1.149		0.827	0.655191
A0A2R8Y5M6	B-cell receptor-associated protein OS=Homo sapiens OX=9606 GN=BCAP31 PE=1 SV=1	BCAP31	5	1	1	1	24.1	771206							1.34273e+06	7.42309e+06
C9JAZ1	Metaxin-2 (Fragment) OS=Homo sapiens OX=9606 GN=MTX2 PE=1 SV=1	MTX2	4	1	10	1	25.7	736289	725175	701776	666350	888059	1.01436e+06	572708	715165	618153	659945	638286	903471
A0A087WXM8	Basal cell adhesion molecule OS=Homo sapiens OX=9606 GN=BCAM PE=1 SV=1	BCAM	3	2	9	2	63.7	450604			1.32301e+06	899170	1.30916e+06	743511	302001	1.2205e+06	1.03425e+06	1.074e+06	1.36293e+06	0.439			2.128	1.595	1.053	0.993	0.506	1.841	1.192	1.787	1.289	1.292	0.661836
A0A7P0T939	A-kinase anchor protein 9 OS=Homo sapiens OX=9606 GN=AKAP9 PE=4 SV=1	AKAP9	0	1	1	1	437.5	1.73938e+07	2.52812e+06	1.78285e+06	1.56366e+06	1.51444e+07	4.92565e+07	1.86165e+07	2.27906e+06	1.57617e+06	2.50876e+06	1.46363e+07	2.5629e+07
A0A087X1I3	Flavoprotein subunit of complex II OS=Homo sapiens OX=9606 GN=SDHA PE=1 SV=1	SDHA	3	1	1	1	56.6
H0YEA7	N-acetylglucosamine-1-phosphotransferase subunit gamma (Fragment) OS=Homo sapiens OX=9606 GN=GNPTG PE=1 SV=8	GNPTG	5	1	1	1	20.2	436531	335178	523927	347082		686498		200808				307352
E9PHY5	Band 4.1-like protein 2 OS=Homo sapiens OX=9606 GN=EPB41L2 PE=1 SV=1	EPB41L2	3	2	5	2	104.3	539390					2.1788e+06						1.5839e+06	0.356					1.187						1.015	0.855
A0A7I2V2U8	Twinfilin-2 OS=Homo sapiens OX=9606 GN=TWF2 PE=1 SV=1	TWF2	19	4	12	3	33.7	3.95708e+06	9.035e+06	3.56735e+06	1.94828e+07	297941	1.91395e+06		1.2485e+07	4.36455e+06	1.36892e+07	7.01068e+06	1.32759e+06	0.534	2.407	0.781	4.344	0.073	0.213		2.897	0.913	2.187	1.617	0.174	5.169	0.486256
C9JQB3	Small monomeric GTPase (Fragment) OS=Homo sapiens OX=9606 GN=RALB PE=1 SV=1	RALB	8	1	1	1	19.2	127336	102314		159914	136324	106424		171646	253524	365584	166230	161160
E9PQ14	Dipeptidyl peptidase 3 (Fragment) OS=Homo sapiens OX=9606 GN=DPP3 PE=1 SV=1	DPP3	7	1	1	1	19.8	362469
H0Y6Z7	Protein-tyrosine-phosphatase (Fragment) OS=Homo sapiens OX=9606 GN=PTPRF PE=1 SV=1	PTPRF	2	2	3	2	174.8	436700		356769		215747	503128	280502		386584		231435	485626	1.141		1.512		1.027	1.086	1.005		1.566		1.034	1.233	1.015	0.854531
H0YL69	Proteasome subunit alpha type (Fragment) OS=Homo sapiens OX=9606 GN=PSMA4 PE=1 SV=1	PSMA4	11	3	7	3	26.4	4.04855e+06		654198				285351		999756	2.71211e+06		162638	2.593		0.68				0.251		0.992	2.057		0.101	0.778	0.602069
A0A0D9SF54	Spectrin alpha chain, non-erythrocytic 1 OS=Homo sapiens OX=9606 GN=SPTAN1 PE=1 SV=1	SPTAN1	2	4	16	4	282.7	1.76972e+07	1.12753e+07	1.51826e+06	5.67339e+06	1.08459e+07	9.45085e+06	1.24879e+07	6.6695e+06		8.13796e+06	1.07891e+07	6.38155e+06	1.824	2.295	0.254	0.967	2.038	0.805	1.766	1.183		0.994	1.902	0.639	0.848	0.196183
C9IZP8	Complement C1s subcomponent (Fragment) OS=Homo sapiens OX=9606 GN=C1S PE=1 SV=1	C1S	17	1	2	1	11.8						1.14403e+06					120102	838237
A0A5F9ZHJ0	Acetyl-CoA acetyltransferase, mitochondrial OS=Homo sapiens OX=9606 GN=ACAT1 PE=1 SV=1	ACAT1	6	2	2	2	35.5
A0A1W2PRL9	Transcription elongation factor A protein 1 OS=Homo sapiens OX=9606 GN=TCEA1 PE=1 SV=1	TCEA1	6	2	2	2	31.6	1.70523e+06	341686											1.576	0.624
G3V1Q4	Septin OS=Homo sapiens OX=9606 GN=SEPTIN7 PE=1 SV=2	SEPTIN7	7	3	3	3	46.5	734543				510707	500524	607027				1.14054e+06	441159	1.06				1.343	0.597	1.201				2.813	0.619	1.421	0.307495
A0A0B4J1R6	Transketolase OS=Homo sapiens OX=9606 GN=TKT PE=1 SV=1	TKT	12	4	9	4	49.9	6.70892e+06	883544	2.35215e+06	975772	254893	1.37759e+06	1.46019e+06	1.20394e+06	2.23977e+06	2.36047e+06	1.98871e+06	1.0399e+06	3.333	0.867	1.896	0.801	0.231	0.566	0.995	1.029	1.725	1.389	1.689	0.502	2.055	0.637409
M0QXB5	Persulfide dioxygenase ETHE1, mitochondrial OS=Homo sapiens OX=9606 GN=ETHE1 PE=1 SV=1	ETHE1	17	2	2	2	28.4	1.41298e+06											181030	1.677											0.209
A0A7I2V2S0	RNA helicase OS=Homo sapiens OX=9606 GN=DDX5 PE=1 SV=1	DDX5	10	3	3	1	47.2	1.37621e+06
B8ZWD1	Acyl-CoA-binding protein OS=Homo sapiens OX=9606 GN=DBI PE=1 SV=1	DBI	37	3	14	3	11.1	4.22332e+06	837814	361748	85614.6	901241	1.56004e+06	294074	691468	665587	152501	614470	3.15208e+06	3.54	1.387	0.492	0.119	1.377	1.081	0.338	0.997	0.865	0.151	0.881	2.568	1.143	0.62639
A0A1X7SBT7	Neuronal pentraxin receptor OS=Homo sapiens OX=9606 GN=NPTXR PE=1 SV=1	NPTXR	2	1	4	1	52.8	475909	572429	234290	214803		1.73167e+06	513097	614985	219058	502378		1.54815e+06
K7EL99	Tubulin-folding cofactor B (Fragment) OS=Homo sapiens OX=9606 GN=TBCB PE=1 SV=2	TBCB	6	1	6	1	14.6	869559	108377	615005	107802	180559	781805	660507	215479	471790		290768	787287
A0A7P0Z497	Peptidyl-prolyl cis-trans isomerase B OS=Homo sapiens OX=9606 GN=PPIB PE=4 SV=1	PPIB	44	8	21	7	20.2	1.131e+07	1.10536e+06		285296	1.71704e+06	9.48516e+06	1.38049e+06	562606	6.48013e+06	6.51162e+06	1.71824e+06	1.42983e+07	2.145	0.414		0.089	0.594	1.487	0.359	0.184	1.905	1.463	0.557	2.636	3.952	0.863159
D6RBZ0	Heterogeneous nuclear ribonucleoprotein A/B OS=Homo sapiens OX=9606 GN=HNRNPAB PE=1 SV=1	HNRNPAB	12	4	4	4	35.7	7.36243e+06												0.946
G3V4U0	Fibulin-5 OS=Homo sapiens OX=9606 GN=FBLN5 PE=1 SV=1	FBLN5	28	12	63	12	50.8	4.17343e+06	3.34921e+06	6.38495e+06	5.44583e+06	4.47162e+06	4.11353e+07	1.23826e+07	7.72944e+06	3.80245e+06	8.25806e+06	6.58532e+06	3.07379e+07	0.352	0.558	0.875	0.76	0.688	2.869	1.434	1.122	0.498	0.826	0.95	2.522	1.667	0.32934
A0A0C4DGZ8	Glycoprotein Ib (Platelet), alpha polypeptide OS=Homo sapiens OX=9606 GN=GP1BA PE=1 SV=1	GP1BA	11	5	17	5	68.9	2.22942e+06	1.5752e+06	7.98896e+06	1.21541e+07	2.50956e+06	7.77364e+06	5.4277e+06	3.10878e+06	1.18393e+06	9.66666e+06	1.96107e+06	2.06539e+06	0.439	0.612	2.552	3.955	0.901	1.265	1.466	1.053	0.361	2.255	0.66	0.395	1.136	0.458152
B4DKV7	Epidermal growth factor receptor kinase substrate 8-like protein 1 OS=Homo sapiens OX=9606 GN=EPS8L1 PE=1 SV=1	EPS8L1	8	5	5	5	73.3				79151.5	55637.3		183550			1.71148e+06						0.244	0.189		0.469			3.779			15.488
H0YJH7	Lamina-associated polypeptide 2, isoforms beta/gamma (Fragment) OS=Homo sapiens OX=9606 GN=TMPO PE=1 SV=1	TMPO	3	1	1	1	26.9
K7EQF8	Lon protease homolog, mitochondrial (Fragment) OS=Homo sapiens OX=9606 GN=LONP1 PE=1 SV=1	LONP1	9	1	1	1	20.3
J3QRR0	von Willebrand factor A domain-containing protein 1 (Fragment) OS=Homo sapiens OX=9606 GN=VWA1 PE=1 SV=1	VWA1	14	1	1	1	15.4
C9JXX4	Insulin-like growth factor-binding protein 5 (Fragment) OS=Homo sapiens OX=9606 GN=IGFBP5 PE=1 SV=1	IGFBP5	23	5	15	5	25.5				359017	182273	7.53446e+06				1.46041e+06	1.46303e+06	2.28094e+07				0.1	0.056	1.045				0.29	0.42	3.722	4.654	0.037418
A0A0G2JSC0	Immunoglobulin lambda variable 5-45 (Fragment) OS=Homo sapiens OX=9606 GN=IGLV5-45 PE=1 SV=1	IGLV5-45	33	6	70	6	13.2	3.68398e+07	1.94443e+07	3.88265e+07	3.39924e+07	2.22192e+07	3.33462e+07	3.58429e+07	2.65984e+07	4.46933e+07	3.64608e+07	2.85588e+07	3.93332e+07	1.056	1.1	1.805	1.61	1.16	0.789	1.409	1.311	1.985	1.237	1.399	1.095	1.165	0.179959
A0A669KB35	C-Jun-amino-terminal kinase-interacting protein 3 OS=Homo sapiens OX=9606 GN=MAPK8IP3 PE=1 SV=1	MAPK8IP3	1	1	1	1	148.4	2.02906e+07						5.58252e+06
C9JWV9	Protein lifeguard 3 (Fragment) OS=Homo sapiens OX=9606 GN=TMBIM1 PE=1 SV=1	TMBIM1	8	1	1	1	19		340199	477335					250648	537665	1.40423e+06
A0A1W2PQL5	Lysosome membrane protein 2 OS=Homo sapiens OX=9606 GN=SCARB2 PE=1 SV=1	SCARB2	5	1	1	1	19.6	3.72352e+06	1.74621e+06	1.09672e+07	4.49067e+06	2.01456e+06	2.54459e+06	1.26712e+07	5.40451e+06	3.05708e+06	16777160		2.01684e+06
C9J2N0	Profilin OS=Homo sapiens OX=9606 GN=PFN2 PE=1 SV=1	PFN2	14	2	6	2	13.6	134216	242921	372485	288183	214817	2.80216e+06	308859	161491		285780	455429	1.80406e+06	0.198	0.706	0.889	0.701	0.576	3.407	0.623	0.409		0.498	1.146	2.58	1.437	0.706917
E9PNF7	Lysosomal Pro-X carboxypeptidase OS=Homo sapiens OX=9606 GN=PRCP PE=1 SV=2	PRCP	24	8	52	8	49.9	1.22038e+07	1.27239e+06	9.55429e+06	1.88528e+07	861810	1.88025e+07	2.95761e+06	6.07113e+06	6.66777e+06	6.63798e+06	933871	8.64191e+06	1.482	0.305	1.883	3.784	0.191	1.887	0.493	1.268	1.255	0.955	0.194	1.02	1.161	0.438061
E9PMT2	LIM domain only protein 7 OS=Homo sapiens OX=9606 GN=LMO7 PE=1 SV=1	LMO7	2	2	2	2	159.9										842232												1.12
H0Y449	Y-box-binding protein 1 (Fragment) OS=Homo sapiens OX=9606 GN=YBX1 PE=1 SV=1	YBX1	20	4	5	4	42	4.28201e+06							26525.8		32779.7			2.799							0.03		0.025
E7ET15	U2 snRNP-associated SURP motif-containing protein OS=Homo sapiens OX=9606 GN=U2SURP PE=1 SV=1	U2SURP	2	2	2	2	118.2	418738								68896.2	236976			1.64								0.418	1.099
A0A0B4J1X2	Voltage-dependent T-type calcium channel subunit alpha-1G OS=Homo sapiens OX=9606 GN=CACNA1G PE=1 SV=1	CACNA1G	1	1	1	1	171.3
A0A7P0T8A7	Basigin OS=Homo sapiens OX=9606 GN=BSG PE=4 SV=1	BSG	15	2	2	2	22.6
A0A7I2V5M5	Nucleolin OS=Homo sapiens OX=9606 GN=NCL PE=1 SV=1	NCL	22	15	15	15	73.6	9.4206e+07	5.70471e+06	1.06329e+07	1.17465e+07	9.12792e+06	3.89682e+06	6.83149e+06	6.59055e+06	7.14948e+06	6700679	8.24037e+06	4.1215e+06	6.112	0.731	1.119	1.26	1.079	0.209	0.608	0.736	0.719	0.515	0.914	0.26	0.708	0.1734
A0A3B3ISD1	Fibroblast growth factor receptor OS=Homo sapiens OX=9606 GN=FGFR1 PE=1 SV=1	FGFR1	2	2	3	1	91.3	1.03068e+06	515011	486092			4.57847e+06	1.00786e+06		708408	1.63183e+06	604839	3.76165e+06
C9IY66	Butyrophilin subfamily 2 member A2 (Fragment) OS=Homo sapiens OX=9606 GN=BTN2A2 PE=1 SV=1	BTN2A2	3	1	6	1	26.6	2.00661e+06			2.12699e+06		2.00183e+06						73498.3
A0A7I2YQB2	75 kDa glucose-regulated protein OS=Homo sapiens OX=9606 GN=HSPA9 PE=1 SV=1	HSPA9	7	4	4	4	63.1
A0A0U1RQT9	Synaptophysin-like protein 1 (Fragment) OS=Homo sapiens OX=9606 GN=SYPL1 PE=1 SV=1	SYPL1	8	1	1	1	15		1.35416e+06	1.95696e+06	3.13482e+06				1.62832e+06	1.80334e+06	3.51654e+06		1.08304e+06
A0A2R8YF45	Peroxisomal multifunctional enzyme type 2 OS=Homo sapiens OX=9606 GN=HSD17B4 PE=1 SV=1	HSD17B4	6	1	1	1	18.7	124205									672505
A0A1B0GVI3	Keratin, type I cytoskeletal 10 OS=Homo sapiens OX=9606 GN=KRT10 PE=1 SV=2	KRT10	49	32	212	24	63.3	9.00447e+07	1.16604e+08	7.9207e+07	8.37634e+07	6.99232e+07	1.08539e+08	1.58723e+08	6.12939e+07	1.71005e+08	4.83994e+08	3.57864e+07	1.25129e+08	0.645	1.65	0.921	0.992	0.913	0.643	1.56	0.756	1.9	4.108	0.438	0.872	1.819	0.445223
B1AHL2	Fibulin-1 OS=Homo sapiens OX=9606 GN=FBLN1 PE=1 SV=1	FBLN1	31	15	140	4	78.3	2.62034e+06	6.52998e+06	6.50202e+06	1.26895e+07	8.48909e+06	2.9041e+07	1.15193e+07	7.40165e+06	1.89582e+07	15473826	7.49714e+06	2.23704e+07	0.199	0.982	0.803	1.597	1.178	1.827	1.203	0.969	2.237	1.395	0.976	1.655	2.071	0.290221
A0A0A0MSA4	Band 4.1-like protein 3 OS=Homo sapiens OX=9606 GN=EPB41L3 PE=1 SV=1	EPB41L3	1	1	1	1	116.1					653083	1.84217e+06			346210		1.78828e+06	1.07008e+06
E7EN95	Filamin-B OS=Homo sapiens OX=9606 GN=FLNB PE=1 SV=1	FLNB	3	8	24	5	256.1	3.07218e+06	1.18821e+06	2.43418e+06	2.25868e+06	1.58865e+06	1.89281e+06	2.17302e+06	1.37602e+06	4.4682e+06	3.41774e+06	1.06903e+06	1.52229e+06	1.318	1.006	1.694	1.601	1.242	0.671	1.279	1.015	2.971	1.737	0.784	0.635	1.066	0.899078
F5GWR7	Protein-tyrosine-phosphatase OS=Homo sapiens OX=9606 GN=PTPRD PE=1 SV=1	PTPRD	1	1	9	1	169.3	899063		751764	938379	1.37456e+06	866615	1.06043e+06	947174	730350	1.02408e+06	1.26124e+06	998500
Q5T7C4	High mobility group protein B1 OS=Homo sapiens OX=9606 GN=HMGB1 PE=1 SV=1	HMGB1	18	3	5	3	18.3	1.33289e+07	2.58167e+06	2.00472e+06	741885			744212	1.65408e+06	563256	2.26908e+06	1.99502e+06	1.17006e+06	4.66	1.782	1.137	0.429			0.357	0.995	0.305	0.94	1.193	0.398	0.774	0.280356
E7ESE2	Prohibitin (Fragment) OS=Homo sapiens OX=9606 GN=PHB PE=1 SV=2	PHB	8	2	3	2	22.4	1.05576e+06					110316				163391		153469	2.694					0.233				0.494		0.381	1.635
A0A087X253	AP complex subunit beta OS=Homo sapiens OX=9606 GN=AP2B1 PE=1 SV=1	AP2B1	2	1	1	1	101.3
A0A0A0MT99	Immunoglobulin lambda joining 3 (Fragment) OS=Homo sapiens OX=9606 GN=IGLJ3 PE=1 SV=1	IGLJ3	16	1	11	1	5.5	5.76637e+07	5.7477e+07	3.9372e+07	6.41122e+07	7.81664e+07	1.35148e+08	6.5594e+07	7.75216e+07	5.15639e+07	66701660	9.1458e+07	8.03504e+07
A0A087X260	TAR DNA-binding protein 43 OS=Homo sapiens OX=9606 GN=TARDBP PE=1 SV=1	TARDBP	3	1	1	1	34.2
F8VV59	Nucleosome assembly protein 1-like 1 OS=Homo sapiens OX=9606 GN=NAP1L1 PE=1 SV=1	NAP1L1	11	2	2	2	38	1.46123e+06		435233		552018	135959					613942		2.161		1.044		1.488	0.166					1.552		1.043
H7BYD9	Peptidylamidoglycolate lyase (Fragment) OS=Homo sapiens OX=9606 GN=PAM PE=1 SV=1	PAM	1	1	12	1	75.6	1.07086e+06	57928.3			495870	3.03514e+06	936736			57478.2	969232	2.6233e+06
A0A7I2V4I8	Aconitate hydratase, mitochondrial OS=Homo sapiens OX=9606 GN=ACO2 PE=1 SV=1	ACO2	7	1	1	1	31
A0A5F9ZH72	Adenosine kinase OS=Homo sapiens OX=9606 GN=ADK PE=1 SV=1	ADK	6	1	1	1	25.9	924282									261081
C9JRL6	Echinoderm microtubule-associated protein-like 2 OS=Homo sapiens OX=9606 GN=EML2 PE=1 SV=2	EML2	3	1	1	1	65.5										917161
A6NFX8	ADP-sugar pyrophosphatase OS=Homo sapiens OX=9606 GN=NUDT5 PE=1 SV=1	NUDT5	9	2	3	2	25.9	6.55271e+06	3.35943e+06	2.41536e+06	7.18778e+06		1.02729e+07	1.11215e+07	4.77151e+06	3.94338e+06	9.14484e+06	1.06037e+07	8.03654e+06	0.881	0.892	0.527	1.597		1.141	2.05	1.103	0.822	1.456	2.437	1.05	1.391	0.20646
A0A7P0TAE9	Calnexin OS=Homo sapiens OX=9606 GN=CANX PE=4 SV=1	CANX	8	5	10	5	71.3	3.92306e+06	855551		7.47129e+06	2.20632e+06	7.57835e+06			2.53911e+06	3.17744e+06	3.00038e+06	5.44661e+06	0.923	0.397		2.904	0.946	1.473			0.926	0.885	1.206	1.245	0.808	0.474903
F5H610	5'-AMP-activated protein kinase subunit beta-1 (Fragment) OS=Homo sapiens OX=9606 GN=PRKAB1 PE=1 SV=1	PRKAB1	26	1	1	1	6.8	225306
F6WIT2	Serine/threonine-protein phosphatase 2A activator OS=Homo sapiens OX=9606 GN=PTPA PE=1 SV=1	PTPA	11	3	5	3	32.9	1.58578e+06					4.32395e+06	268120					1.64801e+06	0.767					1.727	0.178					0.774	0.34	0.180154
E5RH18	LSM1-like protein U6 small nuclear RNA associated isoform 3 OS=Homo sapiens OX=9606 GN=LSM1 PE=1 SV=1	LSM1	16	1	1	1	4.9	388218									92266
G3V1D1	Ferritin OS=Homo sapiens OX=9606 GN=FTH1 PE=1 SV=1	FTH1	42	3	3	3	12.9
H7C3T4	Peroxiredoxin-4 (Fragment) OS=Homo sapiens OX=9606 GN=PRDX4 PE=1 SV=1	PRDX4	17	3	9	1	18.3	1.53769e+06		78870.9	105786		574879			139309	457776
E9PNQ8	Thy-1 antigen (Fragment) OS=Homo sapiens OX=9606 GN=THY1 PE=1 SV=1	THY1	24	3	35	3	18.2	3.14371e+07	2.13021e+07	1.73153e+07	2.78999e+07	3.88945e+06	9.41242e+07	2.96435e+07	2.57353e+07	2.0549e+07	2.7025e+07	1.47209e+07	6.00672e+07	0.955	1.278	0.853	1.4	0.215	2.362	1.235	1.345	0.968	0.972	0.764	1.773	1.413	0.497745
A0A087WVQ9	Elongation factor 1-alpha OS=Homo sapiens OX=9606 GN=EEF1A1 PE=1 SV=2	EEF1A1	32	10	25	10	49.8	7.44575e+07		469999	705841	362805	26538.6	3.25793e+07	687958	1.32032e+06	1.61307e+07	439348	186529	6.082		0.062	0.095	0.054	0.002	3.651	0.097	0.167	1.561	0.061	0.015	5.671	0.147096
A0A0C4DGL3	Deoxyuridine 5'-triphosphate nucleotidohydrolase OS=Homo sapiens OX=9606 GN=DUT PE=1 SV=1	DUT	13	2	2	2	15.4	1.94272e+06				254715				202666				2.297				0.549				0.371
J3QQU6	Secreted and transmembrane protein 1 OS=Homo sapiens OX=9606 GN=SECTM1 PE=1 SV=1	SECTM1	24	2	115	2	15.9	8.15121e+07	8.23361e+07	1.72275e+08	1.31497e+08	1.00071e+08	1.92066e+08	1.04534e+08	1.02316e+08	1.12579e+08	1.46527e+08	7.98669e+07	1.669e+08	0.628	1.253	2.155	1.675	1.406	1.223	1.105	1.357	1.345	1.338	1.053	1.25	1.006	0.736074
X6RAC9	Eukaryotic translation initiation factor 4C OS=Homo sapiens OX=9606 GN=EIF1AX PE=1 SV=1	EIF1AX	6	1	2	1	13.2	677883			326223			185070			167965		186165
H3BVH7	Ras-related protein Rab-27A (Fragment) OS=Homo sapiens OX=9606 GN=RAB27A PE=1 SV=1	RAB27A	5	1	2	1	16.7	384668	242855			532827	115222		349389	461022	253860		296764
F6TLX2	Glyoxalase domain-containing protein 4 OS=Homo sapiens OX=9606 GN=GLOD4 PE=1 SV=1	GLOD4	10	5	7	5	54.7	4.8768e+06	2.22067e+06	3.39468e+06	5.50849e+06	3.4641e+06	3.37675e+06	1.11952e+07	3.48304e+06	4.41915e+06	3.85153e+06	2.24725e+06	4.10087e+06	1.062	0.955	1.199	1.982	1.374	0.607	3.343	1.304	1.491	0.993	0.836	0.868	1.383	0.624324
B4E3S0	Coronin OS=Homo sapiens OX=9606 GN=CORO1C PE=1 SV=1	CORO1C	3	1	1	1	41.6	787876
A0A6Q8PFJ0	Prelamin-A/C OS=Homo sapiens OX=9606 GN=LMNA PE=1 SV=1	LMNA	27	19	65	18	80.9	2.73731e+07	8.51229e+06	2.46562e+07	2.11042e+07	1.58657e+07	7.58899e+07	1.81524e+07	1.70316e+07	2.10849e+07	4.78794e+07	1.38929e+07	6.12738e+07	0.881	0.541	1.287	1.122	0.931	2.018	0.801	0.943	1.052	1.825	0.764	1.917	1.144	0.582759
E7ER45	Maltase-glucoamylase, intestinal OS=Homo sapiens OX=9606 GN=MGAM PE=1 SV=2	MGAM	8	11	35	11	311.8	1.37743e+07	366740	1.44268e+06	9.59383e+06	1.15173e+06	3.65238e+06	1.98856e+06	802091	8.45231e+06	1.22219e+06	243946	1.37693e+06	3.548	0.187	0.603	4.084	0.541	0.777	0.703	0.355	3.375	0.373	0.107	0.345	1.404	0.335515
A0A5H1ZRQ2	RNA helicase OS=Homo sapiens OX=9606 GN=DDX17 PE=1 SV=2	DDX17	5	3	3	1	80.4	7.48163e+06		320532		732381			931828	838669	380798
K7EKZ1	Ubiquitinyl hydrolase 1 (Fragment) OS=Homo sapiens OX=9606 GN=USP32 PE=1 SV=1	USP32	1	1	1	1	96.8
A0A7I2V5S2	Nucleophosmin OS=Homo sapiens OX=9606 GN=NPM1 PE=1 SV=1	NPM1	23	7	12	7	33.9	6.37354e+07	84381.2	49256.8		255081	101817	32592.6	70192.4	94394.8	1.55894e+06	256980	166587	9.986	0.026	0.013		0.073	0.013	0.007	0.019	0.023	0.289	0.069	0.025	1.074	0.442826
E9PQH6	Rho-related GTP-binding protein RhoC (Fragment) OS=Homo sapiens OX=9606 GN=RHOC PE=1 SV=1	RHOC	20	3	3	3	19.2				902862		1.57378e+06			1.50448e+06	1.86525e+06		2.70158e+06				0.826		0.719			1.29	1.222		1.453	1.75	0.176616
K7EKM4	Spermidine synthase OS=Homo sapiens OX=9606 GN=SRM PE=1 SV=1	SRM	9	1	1	1	10.5	850554								105473
A0A0C4DGN4	Zymogen granule protein 16 homolog B OS=Homo sapiens OX=9606 GN=ZG16B PE=1 SV=1	ZG16B	14	2	14	2	19.6	3.59833e+06	6.92594e+06	4.46426e+06	1.20081e+07		7.03187e+06	2.63954e+06	7.88893e+06	7.58502e+06	13586710	2.03253e+06	7.87165e+06	0.495	1.881	0.997	2.73		0.799	0.498	1.867	1.618	2.214	0.478	1.053	1.15	0.416322
E5RJR5	S-phase kinase-associated protein 1 OS=Homo sapiens OX=9606 GN=SKP1 PE=1 SV=1	SKP1	12	2	10	2	18.7	2.90397e+06	1.64168e+06	546939	267853	1.13141e+06	2.47517e+06	1.55739e+06	1.57094e+06	1.09133e+06	990229	915109	1.71702e+06	1.961	2.189	0.599	0.299	1.392	1.381	1.443	1.825	1.142	0.792	1.057	1.127	1.283	0.651484
G8JL96	Protein-tyrosine-phosphatase OS=Homo sapiens OX=9606 GN=PTPRS PE=1 SV=2	PTPRS	6	7	38	7	168.3	1.71555e+07	1.37745e+07	4.0428e+06	3.33153e+06	7.4159e+06	2.53975e+07	9.95125e+06	4.36971e+06	2.16421e+07	5.5099e+06	6.74437e+06	1.96014e+07	1.402	2.222	0.536	0.45	1.104	1.714	1.115	0.614	2.741	0.533	0.942	1.556	1.522	0.989927
A0A1B0GVD5	Cathepsin D OS=Homo sapiens OX=9606 GN=CTSD PE=1 SV=1	CTSD	46	17	163	17	44.2	2.1765e+08	9.43474e+07	1.71119e+08	1.80501e+08	9.14497e+07	1.54382e+08	1.01888e+08	1.18077e+08	2.43992e+08	9.89958e+07	1.1073e+08	1.02772e+08	1.465	1.254	1.869	2.008	1.122	0.859	0.941	1.367	2.547	0.79	1.275	0.673	0.901	0.372722
H0YIS7	RNASEK-C17orf49 readthrough (Fragment) OS=Homo sapiens OX=9606 GN=RNASEK-C17orf49 PE=4 SV=1	RNASEK-C17orf49	9	1	1	1	24.9
A0A1B0GTY3	A disintegrin and metalloproteinase with thrombospondin motifs 2 OS=Homo sapiens OX=9606 GN=ADAMTS2 PE=1 SV=2	ADAMTS2	1	1	2	1	121.3	2.41127e+06	1.41807e+06			1.5477e+06	2.05921e+06		1.53529e+06	1.08339e+06	1.03193e+06	1.51496e+06	1.77409e+06
C9JQD4	Peptidyl-prolyl cis-trans isomerase OS=Homo sapiens OX=9606 GN=PPIH PE=1 SV=2	PPIH	7	1	2	1	16.5	1.25972e+07					5.31911e+06	1.48204e+06			3.22781e+06		4.08797e+06
A0A2R8Y849	40S ribosomal protein S24 OS=Homo sapiens OX=9606 GN=RPS24 PE=1 SV=1	RPS24	9	1	1	1	15.2
B4DLN1	cDNA FLJ60124, highly similar to Mitochondrial dicarboxylate carrier OS=Homo sapiens OX=9606 PE=2 SV=1	--	2	1	1	1	48.1	1.11176e+06
D6RA82	Annexin OS=Homo sapiens OX=9606 GN=ANXA3 PE=1 SV=1	ANXA3	29	7	12	7	32.1	6.04178e+06		803889	6.82159e+06		3.62783e+06		6.88325e+06	2.13482e+06	1.54186e+07		4.11771e+06	0.997		0.215	1.861		0.495		1.954	0.546	3.014		0.661	1.831	0.0964856
A0A7I2V4U5	C-type lectin domain family 4 member G OS=Homo sapiens OX=9606 GN=CLEC4G PE=1 SV=1	CLEC4G	14	2	13	2	30.4	3.89595e+06	3.44582e+06	3.25827e+06	3.64684e+06	1.09842e+06	2.86583e+06	2.19828e+06	1.55016e+06	6.45698e+06	1.56372e+06	651987	1.71542e+06	1.367	2.388	1.855	2.115	0.702	0.831	1.058	0.936	3.512	0.65	0.391	0.585	0.771	0.146891
C9JCU0	Interferon alpha/beta receptor 2 (Fragment) OS=Homo sapiens OX=9606 GN=IFNAR2 PE=1 SV=1	IFNAR2	4	1	13	1	25.8	2.84508e+06	1.93398e+06	1.47156e+06	1.91145e+06	1.49236e+06	4.62541e+06	1.52747e+06	1.78383e+06	1.17336e+06	1.82207e+06	943545	2.67056e+06
A0A087WTD7	A-kinase anchor protein 13 OS=Homo sapiens OX=9606 GN=AKAP13 PE=1 SV=1	AKAP13	1	1	43	1	161.1	1.58168e+08	1.35934e+08	1.19387e+08	1.11223e+08	1.22702e+08	1.20082e+08	1.14161e+08	1.32994e+08	1.28905e+08	132020776	1.24285e+08	1.24758e+08
A0A0C4DGI3	Citrate synthase OS=Homo sapiens OX=9606 GN=CS PE=1 SV=1	CS	2	1	3	1	44.7	5.3632e+06	2.31501e+06	6.48118e+06		2.61645e+06	1.35738e+06	4.30781e+06	1.5693e+06	5.60351e+06	2003605
H0YE29	Rho GTPase-activating protein 1 (Fragment) OS=Homo sapiens OX=9606 GN=ARHGAP1 PE=1 SV=1	ARHGAP1	5	2	5	2	38.4	961657	934394	2.07624e+06	756376	1.93132e+06	3.24661e+06	866782	1.19752e+06	804002	1.96472e+06	1.3351e+06	1.4099e+06	0.624	1.198	2.187	0.812	2.285	1.741	0.772	1.337	0.809	1.511	1.482	0.89	0.957	0.473057
E9PKY4	Transforming growth factor beta receptor type 3 OS=Homo sapiens OX=9606 GN=TGFBR3 PE=1 SV=1	TGFBR3	12	1	3	1	9.3						3.98077e+06						3.48274e+06
A0A2R8Y586	Deoxynucleoside triphosphate triphosphohydrolase SAMHD1 OS=Homo sapiens OX=9606 GN=SAMHD1 PE=1 SV=1	SAMHD1	10	2	8	2	17.8	1.7568e+06	4.82989e+06	613370	6.92636e+06	2.81602e+06	3.83516e+06	1.03921e+06	5.82182e+06	606077	6.38982e+06	3.875e+06	2.29193e+06	0.489	2.653	0.277	3.184	1.428	0.882	0.397	2.786	0.261	2.106	1.843	0.62	0.91	0.292505
A0A7P0Z3Z5	DNA damage-binding protein 1 OS=Homo sapiens OX=9606 GN=DDB1 PE=4 SV=1	DDB1	2	3	4	3	119	2.65678e+06	3.92909e+06	2.00434e+06	3.59568e+06	2.30538e+06	4.84362e+06	4.41191e+06	4.14958e+06	3.64605e+06	3.9142e+06	2.99963e+06	4.55323e+06	0.701	2.048	0.858	1.568	1.109	1.056	1.597	1.884	1.492	1.224	1.353	1.168	1.341	0.228278
X6R700	Chromatin target of PRMT1 protein OS=Homo sapiens OX=9606 GN=CHTOP PE=1 SV=1	CHTOP	7	1	1	1	23.6	344821
J3QTR3	Ubiquitin-40S ribosomal protein S27a (Fragment) OS=Homo sapiens OX=9606 GN=RPS27A PE=1 SV=1	RPS27A	17	2	40	2	12.2	8.66774e+07	2.19507e+07	3.95425e+07	1.24549e+07	2.27532e+07	9.52513e+07	7.40999e+06	2.2672e+07	3.46706e+07	5.67347e+07	3.11807e+07	5.39769e+07	2.027	1.014	1.501	0.481	0.97	1.841	0.238	0.912	1.257	1.572	1.247	1.227	1.179	0.62335
A0A7P0T989	Cathepsin Z OS=Homo sapiens OX=9606 GN=CTSZ PE=4 SV=1	CTSZ	37	8	83	8	32	3.71139e+07	2.45784e+07	2.11692e+07	4.82319e+07	2.2741e+07	6.22553e+07	2.17448e+07	3.704e+07	1.85091e+07	2.51619e+07	1.99488e+07	6.35643e+07	1.048	1.37	0.97	2.25	1.17	1.452	0.842	1.799	0.81	0.841	0.963	1.744	0.892	0.349192
A0A2R8Y4Z1	Protein HEG homolog 1 (Fragment) OS=Homo sapiens OX=9606 GN=HEG1 PE=1 SV=1	HEG1	6	1	2	1	36.3	229408			613423	157150	967495					323885	496731
A0A3B3IUC4	Alpha-galactosidase OS=Homo sapiens OX=9606 GN=GLA PE=1 SV=1	GLA	2	1	1	1	53.2
B0QYK0	RNA-binding protein EWS OS=Homo sapiens OX=9606 GN=EWSR1 PE=1 SV=1	EWSR1	6	3	3	3	64.9	5.06913e+06	739607		2.27825e+06		3.79451e+06	971841	766707		3.08958e+06	604013	2.81489e+06	2.144	0.618		1.592		1.326	0.564	0.558		1.548	0.437	1.157	0.753	0.290034
H0YBS3	Golgi-resident adenosine 3',5'-bisphosphate 3'-phosphatase (Fragment) OS=Homo sapiens OX=9606 GN=BPNT2 PE=1 SV=1	BPNT2	10	1	1	1	9.3
A0A0A0MSQ0	Plastin-3 OS=Homo sapiens OX=9606 GN=PLS3 PE=1 SV=1	PLS3	20	10	29	5	69.3	616805	277042	707003	674190	429463	552146	534414	439797	722462	7.75128e+06	401166	1.08091e+06	0.493	0.438	0.918	0.891	0.626	0.365	0.587	0.605	0.896	7.346	0.549	0.841	2.496	0.169702
H7C0C0	General transcription factor 3C polypeptide 3 (Fragment) OS=Homo sapiens OX=9606 GN=GTF3C3 PE=1 SV=1	GTF3C3	6	1	1	1	16.6	530015				650897	2.86442e+06				438031	751404	2.42702e+06
H0YM70	Proteasome activator complex subunit 2 OS=Homo sapiens OX=9606 GN=PSME2 PE=1 SV=1	PSME2	4	1	1	1	26
A0A087WYF8	PDZ and LIM domain protein 3 OS=Homo sapiens OX=9606 GN=PDLIM3 PE=1 SV=2	PDLIM3	11	2	2	2	30.1
A0A1B0GVW0	ATPase H(+)-transporting lysosomal accessory protein 2 OS=Homo sapiens OX=9606 GN=ATP6AP2 PE=1 SV=1	ATP6AP2	12	4	9	4	38.4	1.21232e+06		754561		421045	1.48031e+07	751051	1.99409e+06		1.18848e+06	773988	1.30796e+07	0.295		0.298		0.187	2.977	0.251	0.835		0.343	0.322	3.094	1.204	0.572796
H7BZL4	Glypican-1 (Fragment) OS=Homo sapiens OX=9606 GN=GPC1 PE=1 SV=1	GPC1	4	1	1	1	30.5				406020					211980
A0A0G2JLV7	Leukocyte-associated immunoglobulin-like receptor 1 OS=Homo sapiens OX=9606 GN=LAIR1 PE=1 SV=1	LAIR1	19	4	9	4	31.5	573854	633196	897168	1.33525e+06	570961	1.40055e+07		153716	642561		2.89405e+06	2.57361e+06	0.224	0.487	0.567	0.86	0.405	4.508		0.103	0.388		1.928	0.975	1.468	0.561948
E9PK08	Serine/threonine-protein phosphatase 6 regulatory subunit 3 (Fragment) OS=Homo sapiens OX=9606 GN=PPP6R3 PE=1 SV=1	PPP6R3	9	1	1	1	16.3	781950				558728						628557
H0YFD6	Enoyl-CoA hydratase OS=Homo sapiens OX=9606 GN=HADHA PE=1 SV=2	HADHA	1	1	10	1	86.3	3.16739e+06		3.43567e+06	3.07086e+06	936761	1.58374e+06	2.04272e+06	3.03841e+06	3.07781e+06	2.53164e+06	2.31675e+06	1.75605e+06
D7RIG5	HLA class II histocompatibility antigen DR beta chain OS=Homo sapiens OX=9606 GN=HLA-DRB1 PE=1 SV=1	HLA-DRB1	8	2	3	1	29.8
A0A0C4DFY8	Protein canopy homolog 3 OS=Homo sapiens OX=9606 GN=CNPY3 PE=1 SV=1	CNPY3	5	1	1	1	15.9	930989											4.54894e+06
F5H442	Tumor susceptibility gene 101 protein OS=Homo sapiens OX=9606 GN=TSG101 PE=1 SV=1	TSG101	5	2	2	2	40.9
H0Y8C6	Importin-5 (Fragment) OS=Homo sapiens OX=9606 GN=IPO5 PE=1 SV=1	IPO5	1	1	1	1	123.8	48306.4							7699.56
C9JVG0	Serotransferrin (Fragment) OS=Homo sapiens OX=9606 GN=TF PE=1 SV=1	TF	68	23	2977	1	14.7	1.27275e+07	1.07336e+07	6.298e+06	1.39161e+07	8.53171e+06	3.67155e+06	9.15856e+06	1.00842e+07	5.40271e+06	13255997	9.40838e+06	6.23176e+06
F5H6I7	Atlastin-3 OS=Homo sapiens OX=9606 GN=ATL3 PE=1 SV=1	ATL3	2	1	1	1	58.7	466697									218434
A0A7I2V2S3	Exportin-1 OS=Homo sapiens OX=9606 GN=XPO1 PE=1 SV=1	XPO1	2	2	2	2	109.3	862838												0.946
A0A3B3IS54	Aspartate--tRNA ligase, mitochondrial OS=Homo sapiens OX=9606 GN=DARS2 PE=1 SV=1	DARS2	2	1	2	1	55.1		743110						784969				533783
A0A7I2V535	Non-POU domain-containing octamer-binding protein OS=Homo sapiens OX=9606 GN=NONO PE=1 SV=1	NONO	8	5	6	4	57.6	3.23151e+06							141514					1.812							0.137
X6RB12	CD209 antigen OS=Homo sapiens OX=9606 GN=CD209 PE=1 SV=1	CD209	4	1	3	1	27.3	934893				246642	575770					167493	435388
K7ERL9	Transmembrane protein 256 (Fragment) OS=Homo sapiens OX=9606 GN=TMEM256 PE=4 SV=1	TMEM256	62	1	1	1	2.6
A0A0G2JIW1	Heat shock 70 kDa protein 1B OS=Homo sapiens OX=9606 GN=HSPA1B PE=1 SV=1	HSPA1B	24	14	39	10	70.1	9.20126e+06	9.34092e+06	7.914e+06	9.06018e+06		7.49236e+06	1.01405e+07	1.14192e+07	1.02633e+07	2.07488e+07	639723	5.47029e+06	0.941	1.887	1.314	1.532		0.633	1.423	2.01	1.628	2.515	0.112	0.544	1.263	0.152392
Q53YU7	Foveolin OS=Homo sapiens OX=9606 GN=GKN1 PE=1 SV=1	GKN1	17	3	27	3	20.3	2.33123e+07	1.43755e+06	2.1618e+06	446159	1.28938e+07	1.66734e+08	5.31396e+07	1.69698e+07	1.41745e+06	1.8684e+06	1.68856e+07	2.01192e+08	0.531	0.065	0.08	0.017	0.535	3.137	1.66	0.665	0.05	0.05	0.657	4.453	3.262	0.108278
A0A024QZ42	HCG1985580, isoform CRA_c OS=Homo sapiens OX=9606 GN=PDCD6 PE=1 SV=1	PDCD6	9	1	6	1	14.4	1.60949e+06		917680	2.4014e+06	139239	375834	294704	876842	1.06306e+06	2.29415e+06	369140	545954
E9PDM8	Protein transport protein Sec24D OS=Homo sapiens OX=9606 GN=SEC24D PE=1 SV=1	SEC24D	1	1	6	1	74.9	8.16013e+06	263147	605362	310917	574605		843261		318189	378537	412404
K7EJV9	60S ribosomal protein L23a (Fragment) OS=Homo sapiens OX=9606 GN=RPL23A PE=1 SV=1	RPL23A	18	3	3	3	19.4	1.22037e+07					112157				905484		422089	3.384					0.026				0.297		0.114	4.385
A0A087WV42	Salivary acidic proline-rich phosphoprotein 1/2 OS=Homo sapiens OX=9606 GN=PRH1 PE=4 SV=1	PRH1	8	1	5	1	19.1			235712			649406			390194	6.02419e+06		673089
H7C5W9	P-type Ca(2+) transporter (Fragment) OS=Homo sapiens OX=9606 GN=ATP2A2 PE=1 SV=1	ATP2A2	1	1	1	1	102.5	595736	605819	521986	306339	419888	4.99453e+06	600061	897484	228047	535671	307323	320775
H7BY55	Complement decay-accelerating factor OS=Homo sapiens OX=9606 GN=CD55 PE=1 SV=2	CD55	20	9	133	9	58.9	5.31121e+07	3.42378e+07	1.76151e+07	5.46259e+07	1.79568e+07	7.7134e+07	2.55762e+07	3.39102e+07	1.42844e+07	3.79244e+07	1.61451e+07	4.92001e+07	1.396	1.778	0.751	2.374	0.86	1.676	0.922	1.534	0.582	1.181	0.726	1.257	0.732	0.0109976
H0YD13	CD44 antigen OS=Homo sapiens OX=9606 GN=CD44 PE=1 SV=2	CD44	21	4	23	4	22.7	2.44658e+07	4.7197e+06	3.4853e+06	1.76692e+07	1.02526e+07	4.03087e+07	5.97752e+06	7.93367e+06	3.79577e+06	6.68622e+06	9.54368e+06	1.25286e+07	1.884	0.718	0.436	2.249	1.439	2.565	0.632	1.051	0.453	0.61	1.257	0.938	0.725	0.128639
H0YHA7	60S ribosomal protein L18 (Fragment) OS=Homo sapiens OX=9606 GN=RPL18 PE=1 SV=1	RPL18	14	2	2	2	19	8.72611e+06	213772				1.03836e+06				2.54597e+06			2.636	0.128				0.259				0.911
C9JUG7	F-actin-capping protein subunit alpha OS=Homo sapiens OX=9606 GN=CAPZA2 PE=1 SV=1	CAPZA2	31	3	6	3	16.7	1.12771e+06		143227	195016		142605			705578	373184		88713.4	2.69		0.554	0.769		0.281			2.609	1.054		0.206	2.271	0.443128
A0A6Q8PHB5	Cytosolic purine 5'-nucleotidase OS=Homo sapiens OX=9606 GN=NT5C2 PE=1 SV=1	NT5C2	2	1	1	1	50.1	135637									379192
A0A0U1RQV3	EGF-containing fibulin-like extracellular matrix protein 1 (Fragment) OS=Homo sapiens OX=9606 GN=EFEMP1 PE=1 SV=1	EFEMP1	70	17	320	1	31.7	1.11347e+06	1.04373e+06	820872	341261	724869	7.39783e+06	793494	653086	794625	931076	856731	5.93797e+06
M0QXH4	Hyaluronan synthase 1 OS=Homo sapiens OX=9606 GN=HAS1 PE=1 SV=1	HAS1	4	1	2	1	23.6	1.985e+06		334073	166364		143877			301064	434117		139383
F8VZ29	Ubiquitin-conjugating enzyme E2 N OS=Homo sapiens OX=9606 GN=UBE2N PE=1 SV=1	UBE2N	23	1	2	1	9.7	1.90112e+06				1.35044e+06
A0A5H1ZRS2	Immunoglobulin kappa variable 2D-28 OS=Homo sapiens OX=9606 GN=IGKV2D-28 PE=1 SV=1	IGKV2D-28	51	8	181	3	11	1.09467e+08	3.53426e+07	9.94413e+07	5.96653e+07	2.7479e+08	4.82539e+08	2.6842e+08	8.44073e+07	6.36724e+07	1.70369e+08	3.59804e+08	3.63815e+08	0.524	0.334	0.772	0.472	2.397	1.908	1.762	0.695	0.472	0.966	2.944	1.692	1.703	0.202543
H0YDU8	Serine/threonine-protein phosphatase (Fragment) OS=Homo sapiens OX=9606 GN=PPP5C PE=1 SV=1	PPP5C	4	1	1	1	55.2	217683
K7EM09	Transmembrane protein 205 (Fragment) OS=Homo sapiens OX=9606 GN=TMEM205 PE=1 SV=1	TMEM205	14	1	1	1	13.4
B7WNR0	Albumin OS=Homo sapiens OX=9606 GN=ALB PE=1 SV=1	ALB	92	215	46554	14	56.2	1.32211e+10	1.77555e+10	1.7217e+10	1.94697e+10	1.15096e+10	8.94525e+09	1.19843e+10	1.82477e+10	1.72581e+10	1.25613e+10	1.37182e+10	9.87282e+09	0.874	2.317	1.846	2.126	1.386	0.488	1.086	2.074	1.768	0.983	1.55	0.634	0.996	0.733334
C9JNG9	Collagen alpha-3(VI) chain (Fragment) OS=Homo sapiens OX=9606 GN=COL6A3 PE=1 SV=1	COL6A3	33	18	104	1	77.1			425246	164317	650260	623631	275670	494552	190426	1.04942e+06	243059	682174
D6RBV2	Vesicular integral-membrane protein VIP36 OS=Homo sapiens OX=9606 GN=LMAN2 PE=1 SV=1	LMAN2	64	19	414	19	36.5	3.67258e+08	3.0018e+08	3.98146e+08	6.84038e+08	2.74219e+08	9.68067e+08	4.86538e+08	4.0366e+08	2.33154e+08	6.35648e+08	2.48951e+08	6.49423e+08	0.738	1.191	1.298	2.271	1.004	1.607	1.341	1.395	0.726	1.513	0.855	1.268	0.976	0.571216
M0QZI8	Kallikrein-11 (Fragment) OS=Homo sapiens OX=9606 GN=KLK11 PE=1 SV=1	KLK11	14	2	3	2	18.8										2275723												1.12
H0YEX9	Junctional adhesion molecule B (Fragment) OS=Homo sapiens OX=9606 GN=JAM2 PE=1 SV=1	JAM2	14	3	5	3	29.1	4.63763e+06	5.04198e+06	2.40979e+06	4.4378e+06	3.09743e+06	7.61219e+06	3.73307e+06	4.56411e+06	4.31773e+06	4.7844e+06	2.99949e+06	6.29484e+06	0.976	2.095	0.823	1.544	1.188	1.324	1.078	1.652	1.409	1.193	1.079	1.288	1.043	0.981227
A8MXP9	Matrin-3 OS=Homo sapiens OX=9606 GN=MATR3 PE=1 SV=1	MATR3	2	2	2	2	99.9	323609					1.83536e+06	628645					1.28664e+06	0.301					1.408	0.801					1.161	1.743	0.623875
A0A0A0MSN4	Angiotensin-converting enzyme OS=Homo sapiens OX=9606 GN=ACE PE=1 SV=1	ACE	1	1	2	1	142.3								200091	219301	146746
E9PLL6	60S ribosomal protein L27a OS=Homo sapiens OX=9606 GN=RPL27A PE=1 SV=1	RPL27A	11	1	1	1	12.2	501004				1.37931e+06		473516			1.24453e+06	1.7507e+06
E9PR22	Kallikrein-12 OS=Homo sapiens OX=9606 GN=KLK12 PE=1 SV=1	KLK12	9	1	2	1	19.4				722804		1.87657e+06	146733			5.932e+06		1.01579e+06
E9PNJ7	Nucleosome assembly protein 1-like 4 (Fragment) OS=Homo sapiens OX=9606 GN=NAP1L4 PE=1 SV=1	NAP1L4	12	1	1	1	16
C9JZW3	Elongation factor 1-beta (Fragment) OS=Homo sapiens OX=9606 GN=EEF1B2 PE=1 SV=1	EEF1B2	12	1	3	1	13.4	93694.4	192759			124500	136685	195968		246506		110560	110668
G3V1D7	Reticulon 4 receptor-like 2, isoform CRA_a OS=Homo sapiens OX=9606 GN=RTN4RL2 PE=1 SV=1	RTN4RL2	4	1	1	1	23									2.24255e+06
B4E127	G/T mismatch-specific thymine DNA glycosylase OS=Homo sapiens OX=9606 GN=TDG PE=1 SV=1	TDG	4	1	6	1	30.1	1.10024e+07	2.73411e+06	3.08701e+06	3.09746e+06	2.88375e+06	1.87227e+06	1.16579e+07	2.63735e+06	4.60011e+06	4943192	3.2175e+06	1.77462e+06
C9J5Y1	Transmembrane protease serine 2 OS=Homo sapiens OX=9606 GN=TMPRSS2 PE=1 SV=2	TMPRSS2	2	1	1	1	49.7	1.00258e+07		304904				123603	279950	129540	90142.6
D6RIR6	3-hydroxybutyrate dehydrogenase type 2 (Fragment) OS=Homo sapiens OX=9606 GN=BDH2 PE=1 SV=1	BDH2	17	1	2	1	14.4
G3V3E8	Epididymal secretory protein E1 OS=Homo sapiens OX=9606 GN=NPC2 PE=1 SV=1	NPC2	44	7	112	7	19.2	8.08193e+07	3.58592e+07	8.72544e+07	3.75349e+07	5.02819e+07	5.80005e+08	9.63742e+07	4.41573e+07	7.33947e+07	5.46453e+07	5.71706e+07	4.82577e+08	0.546	0.478	0.957	0.419	0.619	3.238	0.893	0.513	0.769	0.437	0.66	3.169	1.1	0.485864
J3QRE1	Uncharacterized protein (Fragment) OS=Homo sapiens OX=9606 PE=4 SV=1	--	8	1	12	1	12.4	2.67438e+07	1.03332e+06	3.24736e+07	4.23497e+07	9.34675e+06	1.92141e+07	4.77827e+07	4.37868e+07	2.99503e+07	61604762	2.66069e+07	2.25085e+07
F8WEW9	Unconventional myosin-Ig OS=Homo sapiens OX=9606 GN=MYO1G PE=1 SV=1	MYO1G	4	1	1	1	23.6	510489
H0Y7Z1	Fibronectin (Fragment) OS=Homo sapiens OX=9606 GN=FN1 PE=1 SV=1	FN1	39	26	210	1	120.7
A0A087WYB4	Stomatin-like protein 2, mitochondrial OS=Homo sapiens OX=9606 GN=STOML2 PE=1 SV=1	STOML2	8	2	5	2	33.4				135169		676170	183468		539321	442611	68503.4	1.07465e+06				0.474		1.186	0.534		1.774	1.113	0.249	2.217	2.109	0.0973784
A0A0G2JMB2	Immunoglobulin heavy constant alpha 2 (Fragment) OS=Homo sapiens OX=9606 GN=IGHA2 PE=1 SV=1	IGHA2	62	22	1255	1	36.5	7.13628e+07	1.29726e+08	4.72614e+07	4.30433e+07	1.45063e+08	3.2634e+08	1.03672e+08	8.43128e+07	5.39803e+07	4.60276e+07	1.69315e+08	2.45693e+08
B1AHC9	ATP-dependent DNA helicase 2 subunit 1 OS=Homo sapiens OX=9606 GN=XRCC6 PE=1 SV=1	XRCC6	10	5	9	5	64.2	1.40009e+07	926849	840822	1.23611e+06	2.94672e+06	5.93437e+06	3.70961e+06	874090	847565	1.68766e+06	279621	858668	4.654	0.608	0.454	0.679	1.785	1.63	1.692	0.5	0.437	0.665	0.159	0.277	0.564	0.0782991
F8VX11	Eukaryotic translation initiation factor 4B (Fragment) OS=Homo sapiens OX=9606 GN=EIF4B PE=1 SV=1	EIF4B	5	2	2	2	41.4	4.27193e+06	3.21831e+06	1.987e+06	2.43043e+06	8.9578e+06	1.35333e+07	1.58584e+07	6.62119e+06	1.38798e+07	1.95857e+07	1.92968e+07	809249	0.439	0.653	0.331	0.413	1.678	1.149	2.235	1.17	2.211	2.384	3.391	0.081	3.571	0.393312
A0A3B3IUC0	Integral membrane protein 2 OS=Homo sapiens OX=9606 GN=ITM2B PE=1 SV=1	ITM2B	16	2	5	2	24.2	945851		307683	591450	197811	7.6392e+06		714198		616773		749538	0.608		0.321	0.629	0.232	4.061		0.79		0.47		0.469	0.431	0.414576
M0R3D6	60S ribosomal protein L18a (Fragment) OS=Homo sapiens OX=9606 GN=RPL18A PE=1 SV=1	RPL18A	9	1	1	1	16.7	1.78256e+06	577501
H3BUV8	Lysyl oxidase homolog 1 OS=Homo sapiens OX=9606 GN=LOXL1 PE=1 SV=1	LOXL1	3	1	3	1	46					984009	1.70912e+06					669446	509925
E9PRT6	Triacylglycerol lipase OS=Homo sapiens OX=9606 GN=PNLIPRP1 PE=1 SV=1	PNLIPRP1	4	2	2	1	51.8	305739	540008			697696	1.94304e+06	758063			411940	1.00631e+06	1.67705e+06
H0Y7G9	Serine protease HTRA1 (Fragment) OS=Homo sapiens OX=9606 GN=HTRA1 PE=1 SV=1	HTRA1	11	3	4	3	23.8		257479	440987	200927	66620	4.75572e+06	361875				83676.2	5.05177e+06		0.343	0.483	0.224	0.082	2.65	0.335				0.096	3.312	1.21	0.10827
E9PLK3	Aminopeptidase OS=Homo sapiens OX=9606 GN=NPEPPS PE=1 SV=1	NPEPPS	4	3	3	3	102.9	186821	150581	318453	184900		71442.2	157116	184998		2.56696e+06	203326		0.395	0.629	1.093	0.646		0.125	0.456	0.673		6.432	0.735		4.06	0.371086
E9PKL7	Ras-related protein Rab-2A OS=Homo sapiens OX=9606 GN=RAB2A PE=1 SV=1	RAB2A	8	1	1	1	20.8
I3L3H2	RNA helicase OS=Homo sapiens OX=9606 GN=EIF4A3 PE=1 SV=2	EIF4A3	10	3	3	2	44.5	1.54161e+06											377409	1.52											0.362
A0A0B4J231	Immunoglobulin lambda-like polypeptide 5 OS=Homo sapiens OX=9606 GN=IGLL5 PE=1 SV=1	IGLL5	42	33	2261	2	23.1	7.4753e+08	8.64542e+08	7.56712e+08	4.97183e+08	8.5791e+08	1.31789e+09	9.78799e+08	6.33948e+08	7.82252e+08	6.97868e+08	1.07782e+09	1.0808e+09	0.824	1.883	1.354	0.906	1.724	1.201	1.481	1.202	1.337	0.912	2.032	1.158	1.095	0.765063
K7ENJ4	ATP synthase subunit alpha, mitochondrial (Fragment) OS=Homo sapiens OX=9606 GN=ATP5F1A PE=1 SV=1	ATP5F1A	18	4	6	4	21.3	9.42264e+06									1.65689e+06			1.609									0.335
B5MC59	Replication protein A 14 kDa subunit OS=Homo sapiens OX=9606 GN=RPA3 PE=1 SV=1	RPA3	21	1	1	1	9.2
A0A0A0MT26	Sodium/potassium-transporting ATPase subunit alpha-3 OS=Homo sapiens OX=9606 GN=ATP1A3 PE=1 SV=1	ATP1A3	1	1	3	1	133.2	777353	308267	422656			3.5055e+06	1.15207e+06		641389		581361	1.53054e+06
A0A2R8Y811	40S ribosomal protein S14 (Fragment) OS=Homo sapiens OX=9606 GN=RPS14 PE=1 SV=1	RPS14	16	2	3	2	16.1	5.63252e+06				571064					823098	1.02584e+06		2.646				0.489					0.458	0.824		1.685
Q5T123	SH3 domain-binding glutamic acid-rich-like protein 3 OS=Homo sapiens OX=9606 GN=SH3BGRL3 PE=1 SV=1	SH3BGRL3	42	7	130	7	9.4	1.06696e+08	6.82614e+07	8.03647e+07	7.31117e+07	5.65868e+07	2.65379e+08	6.28557e+07	6.17412e+07	6.77321e+07	9.4715e+07	4.1378e+07	1.918e+08	1.035	1.307	1.264	1.172	1	2.126	0.836	1.03	1.018	1.088	0.686	1.808	0.811	0.00327864
E9PB61	THO complex subunit 4 OS=Homo sapiens OX=9606 GN=ALYREF PE=1 SV=1	ALYREF	4	1	2	1	27.5	3.59503e+06					1.71352e+06						921570
A0A494C0F5	V-set and immunoglobulin domain-containing protein 4 OS=Homo sapiens OX=9606 GN=VSIG4 PE=1 SV=1	VSIG4	44	8	111	8	32.8	7.08981e+07	3.53705e+07	1.65806e+08	2.55163e+07	4.73478e+07	5.5382e+08	9.00664e+07	4.79905e+07	1.37852e+08	4.82773e+07	4.59874e+07	3.48592e+08	0.498	0.49	1.888	0.296	0.606	3.211	0.867	0.579	1.5	0.401	0.552	2.378	1.121	0.643035
I3L145	Sex hormone-binding globulin OS=Homo sapiens OX=9606 GN=SHBG PE=1 SV=1	SHBG	58	12	103	12	37.5	6.07624e+07	1.71373e+07	2.20744e+07	1.94614e+07	2.77367e+07	1.59058e+07	7.13917e+07	4.4251e+07	3.78549e+07	2.01057e+07	3.29524e+07	1.78977e+07	1.78	0.991	1.049	0.942	1.481	0.385	2.868	2.229	1.719	0.698	1.65	0.51	1.446	0.101311
A0A087X0X3	Heterogeneous nuclear ribonucleoprotein M OS=Homo sapiens OX=9606 GN=HNRNPM PE=1 SV=1	HNRNPM	19	11	11	11	77.5	2.13363e+07		264513	190092	1.34361e+06	1.30294e+07	663781	145352	621777	757433	2.31684e+06	8.15838e+06	4.547		0.091	0.067	0.522	2.294	0.194	0.053	0.205	0.191	0.844	1.69	1.5	0.784954
F5H578	Pre-mRNA-processing factor 40 homolog A (Fragment) OS=Homo sapiens OX=9606 GN=PRPF40A PE=1 SV=3	PRPF40A	2	1	1	1	49.7	36247.2
A0A087WZW1	Colipase OS=Homo sapiens OX=9606 GN=CLPS PE=1 SV=1	CLPS	14	1	2	1	10.6	912706						1.40173e+06
A0A087X0K1	Calcium-binding protein 39 OS=Homo sapiens OX=9606 GN=CAB39 PE=1 SV=1	CAB39	5	2	6	2	39.4	1.01788e+06			592115	1.00469e+06				1.28987e+06	240752	1.0747e+06		1.107			1.064	1.991				2.174	0.31	1.998		0.647	0.501812
E9PC52	Histone-binding protein RBBP7 OS=Homo sapiens OX=9606 GN=RBBP7 PE=1 SV=1	RBBP7	5	2	2	2	46.9	289975		256337		238363	135341		66275.8	95444.4		121455		1.596		2.289		2.391	0.615		0.627	0.814		1.143		0.417	0.105321
B5MDF5	GTP-binding nuclear protein Ran OS=Homo sapiens OX=9606 GN=RAN PE=1 SV=1	RAN	17	3	3	3	26.2	5.17468e+06									394410			1.758									0.159
H7C2M4	Lysophospholipid acyltransferase 7 (Fragment) OS=Homo sapiens OX=9606 GN=MBOAT7 PE=1 SV=1	MBOAT7	13	1	1	1	13.2
B4DTF2	Annexin OS=Homo sapiens OX=9606 GN=ANXA8L1 PE=1 SV=1	ANXA8L1	6	1	1	1	30.5
Q8IY13	FBLN7 protein (Fragment) OS=Homo sapiens OX=9606 GN=FBLN7 PE=1 SV=1	FBLN7	5	1	5	1	28			501589	1.69187e+06	356413	1.44475e+06	963696			2.29542e+06	314239	1.19608e+06
E7EUF1	Ectonucleotide pyrophosphatase/phosphodiesterase family member 2 OS=Homo sapiens OX=9606 GN=ENPP2 PE=1 SV=1	ENPP2	4	2	4	2	101.5
K7EKQ2	Hsp90 co-chaperone Cdc37 (Fragment) OS=Homo sapiens OX=9606 GN=CDC37 PE=1 SV=1	CDC37	2	1	1	1	41.6	392490			100095						98595.4
A0A096LNZ9	Ubiquitin-like protein ISG15 (Fragment) OS=Homo sapiens OX=9606 GN=ISG15 PE=1 SV=6	ISG15	7	1	1	1	15.6
M0R1Q1	Complement C3 (Fragment) OS=Homo sapiens OX=9606 GN=C3 PE=1 SV=1	C3	62	5	97	1	11.2	1.32357e+06
B9A041	Malate dehydrogenase, cytoplasmic OS=Homo sapiens OX=9606 GN=MDH1 PE=1 SV=1	MDH1	14	2	6	2	23	3.78182e+06												0.946
A0A087WVQ6	Clathrin heavy chain OS=Homo sapiens OX=9606 GN=CLTC PE=1 SV=1	CLTC	6	9	131	9	191.9	1.17223e+09	1.25269e+08	7.46624e+08	4.27338e+08	1.0964e+09	1.11884e+09	1.23264e+09	7.45009e+08	7.28886e+08	5.96212e+08	1.06444e+09	1.17083e+09	1.301	0.275	1.345	0.784	2.218	1.026	1.877	1.423	1.254	0.784	2.02	1.263	1.782	0.260801
Q5W0H4	Translationally-controlled tumor protein OS=Homo sapiens OX=9606 GN=TPT1 PE=1 SV=1	TPT1	21	4	14	4	21.5	1.24507e+07		546986	275566		6.77372e+06	591417	416114	525028	4.00114e+06		6.06946e+06	3.349		0.239	0.122		1.505	0.218	0.193	0.219	1.275		1.587	3.122	0.925903
A0A7P0T9B0	Anthrax toxin receptor 1 (Fragment) OS=Homo sapiens OX=9606 GN=ANTXR1 PE=4 SV=1	ANTXR1	7	2	22	2	39.2	1.80835e+06	4.03842e+06	2.81314e+06	1.49013e+07		1.18125e+07	2.56547e+06	4.4454e+06	1.9018e+06	1.65084e+07	4.20129e+06	8.55735e+06	0.256	1.128	0.646	3.484		1.381	0.498	1.082	0.417	2.766	1.016	1.177	1.039	0.838354
J3KPA1	Cysteine-rich secretory protein 3 OS=Homo sapiens OX=9606 GN=CRISP3 PE=1 SV=1	CRISP3	32	7	63	7	31	1.17544e+07	2.34443e+07	8.95611e+06	3.7261e+07	1.86659e+07	5.33839e+06	1.62879e+07	2.58023e+07	1.22343e+07	9.07298e+07	1.31744e+07	1.0525e+07	0.487	1.917	0.602	2.549	1.408	0.183	0.925	1.837	0.785	4.449	0.933	0.424	1.481	0.168097
A0A286YFL8	Palmitoyl-protein hydrolase 1 (Fragment) OS=Homo sapiens OX=9606 GN=PPT1 PE=1 SV=1	PPT1	5	1	1	1	35.7	728385			299764		386497			591954
P01833	Polymeric immunoglobulin receptor OS=Homo sapiens OX=9606 GN=PIGR PE=1 SV=4	PIGR	46	39	510	39	83.2	8.16349e+08	5.98187e+08	6.10522e+08	6.30333e+08	4.92843e+08	1.78218e+09	5.19526e+08	6.49388e+08	7.99233e+08	7.58035e+08	4.77648e+08	1.23308e+09	0.989	1.431	1.2	1.262	1.088	1.784	0.864	1.354	1.501	1.088	0.99	1.452	0.943	0.316274
P25786	Proteasome subunit alpha type-1 OS=Homo sapiens OX=9606 GN=PSMA1 PE=1 SV=1	PSMA1	11	3	6	3	29.5	4.51215e+06		1.19848e+06	101926		153214		71899.9	1.57384e+06	1.66999e+06	176826	160651	3.993		1.721	0.149		0.112		0.109	2.159	1.751	0.268	0.138	4.746	0.32586
P07225	Vitamin K-dependent protein S OS=Homo sapiens OX=9606 GN=PROS1 PE=1 SV=1	PROS1	17	10	80	10	75.1	2.10341e+07	1.74098e+07	2.60646e+07	1.07436e+07	2.05491e+07	2.1827e+07	3.76171e+07	2.23267e+07	3.30373e+07	2.44181e+07	2.19716e+07	2.45212e+07	0.848	1.386	1.705	0.716	1.51	0.727	2.08	1.548	2.065	1.166	1.515	0.961	1.456	0.0554796
P30050	60S ribosomal protein L12 OS=Homo sapiens OX=9606 GN=RPL12 PE=1 SV=1	RPL12	19	2	3	2	17.8	984563					258939					245924	226958	2.17					0.472					0.927	0.486	1.03
P51991	Heterogeneous nuclear ribonucleoprotein A3 OS=Homo sapiens OX=9606 GN=HNRNPA3 PE=1 SV=2	HNRNPA3	12	4	6	3	39.6	1.13735e+07	371795					264434			1.73535e+06			3.131	0.202					0.1			0.566			0.032
Q8TER0	Sushi, nidogen and EGF-like domain-containing protein 1 OS=Homo sapiens OX=9606 GN=SNED1 PE=2 SV=2	SNED1	1	1	2	1	152.1						524872		157051	116848			487507
P08294	Extracellular superoxide dismutase [Cu-Zn] OS=Homo sapiens OX=9606 GN=SOD3 PE=1 SV=2	SOD3	32	7	53	7	25.8	4.99733e+06	4.99507e+06	1.90225e+06	7.23378e+06	1.54938e+06	1.20965e+07	4.08517e+06	5.43471e+06	4.13442e+06	1.19334e+07	4.27118e+06	1.26407e+07	0.754	1.487	0.465	1.803	0.426	1.507	0.845	1.41	0.966	2.132	1.101	1.853	1.524	0.0799495
P35326	Small proline-rich protein 2A OS=Homo sapiens OX=9606 GN=SPRR2A PE=1 SV=1	SPRR2A	61	3	5	1	8				663545						18554792
Q6UX71	Plexin domain-containing protein 2 OS=Homo sapiens OX=9606 GN=PLXDC2 PE=1 SV=1	PLXDC2	2	1	5	1	59.5	400747	680697	465163	748295	466086	284870	333038	463552	658304	701253	205559	253060
P29373	Cellular retinoic acid-binding protein 2 OS=Homo sapiens OX=9606 GN=CRABP2 PE=1 SV=2	CRABP2	33	5	15	5	15.7	493671	865735				1.49959e+07	1.18892e+06	692701		25517592		2.83037e+07	0.045	0.157				1.139	0.15	0.109		2.778		2.528	2.082	0.365691
Q96PK6	RNA-binding protein 14 OS=Homo sapiens OX=9606 GN=RBM14 PE=1 SV=2	RBM14	2	2	2	2	69.4	1.81134e+06	419849	2.40161e+06	878146	1.62014e+06	1.52691e+06	1.07464e+06	346122	1.5513e+06	2.27185e+06		329448	1.324	0.606	2.849	1.061	2.159	0.922	1.078	0.435	1.758	1.968		0.234	0.852	0.326771
P07998	Ribonuclease pancreatic OS=Homo sapiens OX=9606 GN=RNASE1 PE=1 SV=4	RNASE1	60	6	370	6	17.6	2.66762e+08	2.07751e+08	5.45565e+08	8.24218e+07	3.36686e+08	2.38783e+09	4.39367e+08	1.8392e+08	4.38173e+08	3.43929e+08	3.65383e+08	2.09343e+09	0.394	0.605	1.306	0.201	0.906	2.912	0.889	0.467	1.002	0.601	0.922	3.003	1.472	0.356122
P60903	Protein S100-A10 OS=Homo sapiens OX=9606 GN=S100A10 PE=1 SV=2	S100A10	18	2	3	2	11.2	8.51729e+07		8.75038e+07	1.04583e+08	1.09153e+08	7.62643e+07	8.67554e+07	1.09722e+08	9.6622e+07	1.58011e+08	1.6049e+08	9.40093e+07	0.759		1.265	1.539	1.772	0.561	1.06	1.681	1.334	1.667	2.444	0.814	1.273	0.0272685
P23526	Adenosylhomocysteinase OS=Homo sapiens OX=9606 GN=AHCY PE=1 SV=4	AHCY	7	3	11	3	47.7	8.41313e+06		2.19783e+06	1.07693e+06		636467	137686		3.05077e+06	2.22739e+06	406255	341162	3.874		1.642	0.82		0.242	0.087		2.178	1.215	0.32	0.153	0.866	0.430837
P48061	Stromal cell-derived factor 1 OS=Homo sapiens OX=9606 GN=CXCL12 PE=1 SV=1	CXCL12	9	1	5	1	10.7		342049		918921	970201	1.17201e+06					1.8825e+06	1.02158e+06
Q9HAT2	Sialate O-acetylesterase OS=Homo sapiens OX=9606 GN=SIAE PE=1 SV=1	SIAE	18	8	55	8	58.3	2.39673e+07	5.4189e+06	1.83025e+07	3.13369e+07	2.98974e+06	1.41284e+07	9.00523e+06	7.01085e+06	1.81006e+07	7335475	2.0826e+06	4.49666e+06	1.887	0.842	2.338	4.077	0.429	0.919	0.972	0.949	2.209	0.684	0.28	0.344	0.63	0.0752069
Q9UHB9	Signal recognition particle subunit SRP68 OS=Homo sapiens OX=9606 GN=SRP68 PE=1 SV=2	SRP68	1	1	1	1	70.7	254903
Q86Y82	Syntaxin-12 OS=Homo sapiens OX=9606 GN=STX12 PE=1 SV=1	STX12	3	1	1	1	31.6
Q9UBC9	Small proline-rich protein 3 OS=Homo sapiens OX=9606 GN=SPRR3 PE=1 SV=2	SPRR3	85	12	73	12	18.1	4.18033e+07	1.0586e+07	2.01029e+07	1.02024e+08	9.48604e+06	2.22409e+07	4.03421e+07	1.64931e+07	1.0836e+07	2.19327e+09	9.48845e+06	5.74612e+06	0.191	0.096	0.149	0.771	0.079	0.084	0.253	0.13	0.077	11.88	0.074	0.026	3.308	0.685566
Q99436	Proteasome subunit beta type-7 OS=Homo sapiens OX=9606 GN=PSMB7 PE=1 SV=1	PSMB7	3	1	2	1	29.9	2.33754e+06									945993
P28072	Proteasome subunit beta type-6 OS=Homo sapiens OX=9606 GN=PSMB6 PE=1 SV=4	PSMB6	5	1	2	1	25.3	905828									564876
Q06830	Peroxiredoxin-1 OS=Homo sapiens OX=9606 GN=PRDX1 PE=1 SV=1	PRDX1	51	9	27	6	22.1	1.40496e+08	751710	3.28195e+06	8.37705e+06	1.78513e+06	5.29297e+06	1.83882e+06	2.40786e+06	1.48291e+07	2.6886e+07	3.69745e+06	1.8159e+06	7.541	0.08	0.286	0.743	0.175	0.235	0.135	0.222	1.234	1.71	0.339	0.095	1.958	0.857727
P20962	Parathymosin OS=Homo sapiens OX=9606 GN=PTMS PE=1 SV=2	PTMS	12	2	7	2	11.5	306118	541019		401786	390830	2.42599e+06	483077		225605	179358	458437	1.01132e+06	0.451	1.573		0.978	1.049	2.952	0.976		0.515	0.313	1.154	1.447	1.019	0.603103
P63220	40S ribosomal protein S21 OS=Homo sapiens OX=9606 GN=RPS21 PE=1 SV=1	RPS21	17	1	1	1	9.1	1.50594e+06
P49908	Selenoprotein P OS=Homo sapiens OX=9606 GN=SELENOP PE=1 SV=3	SELENOP	15	7	47	7	43.2	2.84098e+06	1.705e+06	3.85828e+06	7.50738e+06	4.45336e+07	2.82603e+07	1.03281e+07	3.7453e+06	4.34182e+06	1.33331e+07	6.42049e+07	3.54304e+07	0.147	0.174	0.323	0.64	4.186	1.204	0.731	0.332	0.347	0.815	5.661	1.776	2.009	0.0615762
P32119	Peroxiredoxin-2 OS=Homo sapiens OX=9606 GN=PRDX2 PE=1 SV=5	PRDX2	32	7	45	6	21.9	2.5058e+07	3.51715e+06	8.80313e+06	2.33311e+06	2.88939e+06	2.07361e+06	2.14679e+06	2.32931e+06	1.90033e+07	1.02578e+07	871536	4.15711e+06	3.409	0.945	1.943	0.525	0.716	0.233	0.401	0.545	4.007	1.653	0.203	0.55	1.425	0.72244
O00487	26S proteasome non-ATPase regulatory subunit 14 OS=Homo sapiens OX=9606 GN=PSMD14 PE=1 SV=1	PSMD14	5	1	1	1	34.6	8.1769e+06						1.00739e+07
O00560	Syntenin-1 OS=Homo sapiens OX=9606 GN=SDCBP PE=1 SV=1	SDCBP	13	2	9	2	32.4	1.96795e+06	842540	1.19266e+06	1.20186e+06	675112	2.67483e+06	820131	971049		609047	639944	1.2143e+06	1.599	1.351	1.572	1.613	0.999	1.795	0.914	1.357		0.586	0.889	0.959	0.673	0.0658511
Q9UIV8	Serpin B13 OS=Homo sapiens OX=9606 GN=SERPINB13 PE=1 SV=2	SERPINB13	24	9	17	1	44.2	2.24131e+06	1.34918e+06	859343	1.79389e+06		628214				7.10693e+06		395679
P42224	Signal transducer and activator of transcription 1-alpha/beta OS=Homo sapiens OX=9606 GN=STAT1 PE=1 SV=2	STAT1	4	2	2	2	87.3	2.06206e+06	830813	1.42103e+06	560827	1.4382e+06	482727	325768	930738	1.79398e+06	383126	944696	457676	2.012	1.601	2.25	0.904	2.558	0.389	0.436	1.562	2.714	0.443	1.576	0.434	0.77	0.184921
P31948	Stress-induced-phosphoprotein 1 OS=Homo sapiens OX=9606 GN=STIP1 PE=1 SV=1	STIP1	19	12	16	12	62.6	1.4824e+07	1.49438e+06	3.39658e+06	552340	6.24506e+06	3.65352e+06	4.13294e+06	1.31966e+06	6.37779e+06	2.94389e+06	6.6147e+06	4.07045e+06	3.025	0.602	1.125	0.186	2.323	0.616	1.157	0.463	2.017	0.712	2.308	0.807	1.513	0.635163
P31949	Protein S100-A11 OS=Homo sapiens OX=9606 GN=S100A11 PE=1 SV=2	S100A11	18	2	2	2	11.7	761211		969348	1.91501e+06		2.79019e+06	768206		673318	8.61748e+06	483928	1.43962e+06	0.352		0.727	1.463		1.066	0.487		0.482	4.718	0.382	0.647	1.47	0.731382
P0DJI8	Serum amyloid A-1 protein OS=Homo sapiens OX=9606 GN=SAA1 PE=1 SV=1	SAA1	48	5	18	2	13.5	4.56569e+07		2.58395e+06		2.65786e+07	2.78403e+06			2.32295e+06			482800	3.222		0.296		3.419	0.162			0.254			0.033	0.531	0.43896
Q15019	Septin-2 OS=Homo sapiens OX=9606 GN=SEPTIN2 PE=1 SV=1	SEPTIN2	2	1	1	1	41.5	568675					497589		72838.2	390343			73196.7
Q9H2G2	STE20-like serine/threonine-protein kinase OS=Homo sapiens OX=9606 GN=SLK PE=1 SV=1	SLK	2	2	5	2	142.6	1.12637e+06	812862	691508	670018	1.81932e+06	2.06991e+06	1.11443e+06	801678	681455	773076	1.60403e+06	1.78316e+06	0.917	1.306	0.913	0.901	2.698	1.392	1.244	1.122	0.86	0.745	2.232	1.41	0.971	0.581132
Q14515	SPARC-like protein 1 OS=Homo sapiens OX=9606 GN=SPARCL1 PE=1 SV=2	SPARCL1	21	9	49	9	75.2	1.08092e+07	63473.6	2.63247e+06	79904.4	101596	5.99221e+06	3.11007e+06	194214	2.52685e+06	7257714	2.21026e+06	1.05512e+07	2.695	0.031	1.065	0.033	0.046	1.234	1.064	0.083	0.977	2.143	0.942	2.557	15.247	0.15511
Q0VAF6	Syncollin OS=Homo sapiens OX=9606 GN=SYCN PE=2 SV=1	SYCN	20	3	15	3	14.4	1.53265e+06			560479	1.26067e+06	2.21375e+07	2.09296e+06			1.83396e+06	615085	2.85945e+07	0.198			0.12	0.297	2.361	0.371			0.28	0.136	3.587	1.546	0.5002
Q9BYZ8	Regenerating islet-derived protein 4 OS=Homo sapiens OX=9606 GN=REG4 PE=1 SV=1	REG4	16	1	1	1	18.2
P05451	Lithostathine-1-alpha OS=Homo sapiens OX=9606 GN=REG1A PE=1 SV=3	REG1A	63	13	212	8	18.7	4.95038e+08	9.19551e+08	4.74956e+08	1.7052e+08	2.7092e+08	8.81783e+08	5.54601e+08	6.77141e+08	3.9943e+08	3.66349e+08	3.52413e+08	7.28146e+08	0.893	3.276	1.391	0.508	0.891	1.315	1.373	2.102	1.117	0.783	1.087	1.277	1.119	0.68988
P60866	40S ribosomal protein S20 OS=Homo sapiens OX=9606 GN=RPS20 PE=1 SV=1	RPS20	10	1	1	1	13.4	6.99258e+06									1.0182e+06
Q9BW04	Specifically androgen-regulated gene protein OS=Homo sapiens OX=9606 GN=SARG PE=1 SV=2	SARG	1	1	1	1	63.9										415967	172307
Q9BSE5	Agmatinase, mitochondrial OS=Homo sapiens OX=9606 GN=AGMAT PE=1 SV=2	AGMAT	3	1	1	1	37.6						8.18886e+06			367566	353748		1.01337e+07
O75368	SH3 domain-binding glutamic acid-rich-like protein OS=Homo sapiens OX=9606 GN=SH3BGRL PE=1 SV=1	SH3BGRL	79	10	93	10	12.8	6.07901e+07	3.99948e+07	5.34208e+07	3.95964e+06	2.37969e+07	1.89296e+08	4.33545e+07	3.28613e+07	6.24e+07	2.89378e+07	3.52717e+07	1.28131e+08	0.983	1.277	1.401	0.106	0.701	2.528	0.961	0.914	1.564	0.554	0.975	2.013	1.704	0.435335
O75264	Small integral membrane protein 24 OS=Homo sapiens OX=9606 GN=SMIM24 PE=2 SV=2	SMIM24	15	1	1	1	15	1.57388e+06			112729					180555
Q9HCY8	Protein S100-A14 OS=Homo sapiens OX=9606 GN=S100A14 PE=1 SV=1	S100A14	63	6	9	6	11.7			2.10474e+06						466823	2.90448e+07					0.307						0.065	3.088			0.212
Q96P63	Serpin B12 OS=Homo sapiens OX=9606 GN=SERPINB12 PE=1 SV=1	SERPINB12	16	5	10	5	46.2				1.82464e+06						5.35177e+07		630720				0.153						3.214		0.031	21.007
P29508	Serpin B3 OS=Homo sapiens OX=9606 GN=SERPINB3 PE=1 SV=2	SERPINB3	54	24	61	10	44.5	1.54511e+07	1.06787e+06	4.59826e+06	3.83175e+07	141180	1.15758e+07	2.23376e+06	1.26524e+06	437439	4.43875e+08	192519	5.59369e+06	0.334	0.046	0.161	1.37	0.006	0.207	0.066	0.047	0.015	11.373	0.007	0.118	1.892	0.580057
Q16629	Serine/arginine-rich splicing factor 7 OS=Homo sapiens OX=9606 GN=SRSF7 PE=1 SV=1	SRSF7	4	1	1	1	27.4	448683											198926
P38159	RNA-binding motif protein, X chromosome OS=Homo sapiens OX=9606 GN=RBMX PE=1 SV=3	RBMX	4	2	2	2	42.3	2.8458e+06				1.04733e+06	1.19441e+06				1.06274e+06	2.00517e+06	1.55347e+06	1.663				1.116	0.577				0.736	2.004	0.883	1.663	0.0998797
Q8N122	Regulatory-associated protein of mTOR OS=Homo sapiens OX=9606 GN=RPTOR PE=1 SV=1	RPTOR	1	1	2	1	148.9										79098310
P04271	Protein S100-B OS=Homo sapiens OX=9606 GN=S100B PE=1 SV=2	S100B	24	1	2	1	10.7
O95171	Sciellin OS=Homo sapiens OX=9606 GN=SCEL PE=1 SV=2	SCEL	11	7	7	7	77.5	3.55022e+06	147224		633765	785978	1.39133e+06	1.25551e+06	135167	1.21329e+06	1.58195e+07	791861	1.59247e+06	1.352	0.111		0.399	0.546	0.438	0.656	0.089	0.716	7.138	0.516	0.59	4.294	0.528963
Q8WWX9	Selenoprotein M OS=Homo sapiens OX=9606 GN=SELENOM PE=1 SV=3	SELENOM	26	3	10	3	16.2		354231	739143		423248	8.06012e+06	810575	491153	414443	322435	436148	5.94182e+06		0.368	0.63		0.406	3.501	0.584	0.444	0.338	0.201	0.392	3.036	0.894	0.436394
Q96DI7	U5 small nuclear ribonucleoprotein 40 kDa protein OS=Homo sapiens OX=9606 GN=SNRNP40 PE=1 SV=1	SNRNP40	8	1	1	1	39.3	263748					163009						234436
P11277	Spectrin beta chain, erythrocytic OS=Homo sapiens OX=9606 GN=SPTB PE=1 SV=5	SPTB	1	2	17	2	246.3	2.02315e+06	1.70239e+06	1.14859e+07	4.00775e+06	792085	5.46033e+06	9.82738e+06	1.25236e+07	3.16212e+06	1.44237e+07		3.86188e+06	0.304	0.505	2.799	0.995	0.217	0.678	2.025	3.236	0.736	2.566		0.564	3.349	0.364176
P14923	Junction plakoglobin OS=Homo sapiens OX=9606 GN=JUP PE=1 SV=3	JUP	42	25	30	25	81.7	664616	826999	8.14764e+06	809211	517913	8.73645e+06	2.91318e+06	589359	5.86239e+06	9.44619e+07	2.68676e+06	7.25034e+06	0.057	0.139	1.124	0.114	0.08	0.614	0.34	0.086	0.773	9.516	0.391	0.599	16.101	0.193416
P20339	Ras-related protein Rab-5A OS=Homo sapiens OX=9606 GN=RAB5A PE=1 SV=2	RAB5A	6	1	1	1	23.6
P08621	U1 small nuclear ribonucleoprotein 70 kDa OS=Homo sapiens OX=9606 GN=SNRNP70 PE=1 SV=2	SNRNP70	2	1	1	1	51.5	1.46341e+06									862130
P48595	Serpin B10 OS=Homo sapiens OX=9606 GN=SERPINB10 PE=1 SV=1	SERPINB10	2	1	1	1	45.4		220087	185969		351296	1.92733e+06				809750	392663	2.02881e+06
Q14247	Src substrate cortactin OS=Homo sapiens OX=9606 GN=CTTN PE=1 SV=2	CTTN	1	1	1	1	61.5	172470	46557.5				148041				508812
P22532	Small proline-rich protein 2D OS=Homo sapiens OX=9606 GN=SPRR2D PE=2 SV=2	SPRR2D	49	3	4	1	7.9						1.38252e+06				34478934		989236
Q6UXB8	Peptidase inhibitor 16 OS=Homo sapiens OX=9606 GN=PI16 PE=1 SV=1	PI16	24	8	72	8	49.4	3.60287e+07	7.04376e+07	2.62939e+07	4.71915e+07	2.67956e+07	1.68373e+08	2.59043e+07	6.19642e+07	9.13909e+06	3.60461e+07	2.0133e+07	8.90165e+07	0.662	2.557	0.784	1.434	0.898	2.558	0.653	1.96	0.26	0.785	0.633	1.591	0.66	0.0267587
O43490	Prominin-1 OS=Homo sapiens OX=9606 GN=PROM1 PE=1 SV=1	PROM1	8	4	13	4	97.1			756742	794458		782422		1.47075e+06	3.04494e+06	670713					0.927	0.991		0.488		1.909	3.562	0.6			2.224	0.727151
P62906	60S ribosomal protein L10a OS=Homo sapiens OX=9606 GN=RPL10A PE=1 SV=2	RPL10A	9	2	10	2	24.8	5.61041e+06	1.93978e+06		6.12264e+06	1.60727e+06	958510	3.73066e+06	1.49165e+06		6.7948e+06	1.20963e+06	1.02211e+06	1.741	1.188		3.139	0.909	0.246	1.588	0.796		2.497	0.642	0.308	0.867	0.205569
P42677	40S ribosomal protein S27 OS=Homo sapiens OX=9606 GN=RPS27 PE=1 SV=3	RPS27	13	1	1	1	9.5	913096
Q9UGT4	Sushi domain-containing protein 2 OS=Homo sapiens OX=9606 GN=SUSD2 PE=1 SV=1	SUSD2	3	1	2	1	90.2
O43776	Asparagine--tRNA ligase, cytoplasmic OS=Homo sapiens OX=9606 GN=NARS1 PE=1 SV=1	NARS1	7	2	3	2	62.9	626518					87859.3		84636.2		296396	132795		2.413					0.28		0.561		1.352	0.874
P36639	7,8-dihydro-8-oxoguanine triphosphatase OS=Homo sapiens OX=9606 GN=NUDT1 PE=1 SV=3	NUDT1	8	1	7	1	22.5		297029	327193	387096				480404	297232	372810
C9JRZ8	Aldo-keto reductase family 1 member B15 OS=Homo sapiens OX=9606 GN=AKR1B15 PE=1 SV=2	AKR1B15	18	3	4	1	36.5						727181
Q9Y5C1	Angiopoietin-related protein 3 OS=Homo sapiens OX=9606 GN=ANGPTL3 PE=1 SV=1	ANGPTL3	21	7	29	7	53.6	981974	675030	4.09918e+06		8.33587e+06	1.20014e+08	8.3117e+06	4.66939e+06	765109	3.68733e+06	8.18079e+06	1.59654e+08	0.032	0.043	0.217		0.495	3.231	0.371	0.262	0.039	0.142	0.456	5.056	4.071	0.471832
P61604	10 kDa heat shock protein, mitochondrial OS=Homo sapiens OX=9606 GN=HSPE1 PE=1 SV=2	HSPE1	36	4	11	4	10.9	2.15173e+07		1.08813e+06	816362		2.15897e+06	2.18877e+06	785203	1.44967e+06	1.56682e+06	308056	2.79693e+06	5.869		0.482	0.368		0.487	0.819	0.368	0.613	0.506	0.144	0.742	1.077	0.696194
Q9BU40	Chordin-like protein 1 OS=Homo sapiens OX=9606 GN=CHRDL1 PE=2 SV=2	CHRDL1	13	4	5	4	52					1.12255e+06	7.01721e+06	1.0684e+06		872524	573470	1.17103e+06	7.92013e+06					0.686	1.944	0.491		0.454	0.228	0.671	2.581	1.153	0.549558
P28325	Cystatin-D OS=Homo sapiens OX=9606 GN=CST5 PE=1 SV=1	CST5	18	2	2	2	16.1						754224						468104						0.965						0.704	0.73
Q5JWF2	Guanine nucleotide-binding protein G(s) subunit alpha isoforms XLas OS=Homo sapiens OX=9606 GN=GNAS PE=1 SV=2	GNAS	2	2	4	1	111	1.04933e+06			886505		1.10219e+06	1.68219e+06			827579	3.77415e+06	839074
O60234	Glia maturation factor gamma OS=Homo sapiens OX=9606 GN=GMFG PE=1 SV=1	GMFG	27	4	17	3	16.8	1.16828e+07	3.75566e+06	2.40244e+06	473750	2.32568e+06	1.96627e+07	3.07097e+06	4.6663e+06		3.7136e+06	615936	1.20196e+07	1.888	1.198	0.63	0.127	0.685	2.625	0.681	1.297		0.711	0.17	1.888	1.602	0.74615
P33151	Cadherin-5 OS=Homo sapiens OX=9606 GN=CDH5 PE=1 SV=5	CDH5	12	8	44	8	87.5	5.6048e+06	1.01417e+07	6.79555e+06	8.41361e+06	7.75798e+06	2.92912e+07	1.56108e+07	3.76816e+06	2.10575e+06	9.69176e+06	1.00068e+07	2.78898e+07	0.464	1.658	0.913	1.151	1.171	2.004	1.773	0.537	0.27	0.951	1.417	2.245	1.266	0.717098
P36222	Chitinase-3-like protein 1 OS=Homo sapiens OX=9606 GN=CHI3L1 PE=1 SV=2	CHI3L1	40	14	40	14	42.6	4.05808e+06		4.77658e+06	1.73913e+06	2.56526e+06	1.8537e+08	8.37512e+06	5.13857e+06	1.59701e+06	6.59858e+06	2.30461e+06	1.06364e+08	0.128		0.245	0.091	0.148	4.846	0.363	0.28	0.078	0.247	0.125	3.271	1.478	0.881635
Q9UKY7	Protein CDV3 homolog OS=Homo sapiens OX=9606 GN=CDV3 PE=1 SV=1	CDV3	3	1	1	1	27.3	8.10479e+06	7.44635e+06	1.28792e+07	5.17032e+06	6.00054e+06	3.6738e+06	3.87951e+06	6.16179e+06	1.17365e+07	6.30615e+06	5.19252e+06	3.31437e+06
P19835	Bile salt-activated lipase OS=Homo sapiens OX=9606 GN=CEL PE=1 SV=3	CEL	3	2	3	2	79.3	490697	413823	179142		611421	976782		290026	214098	511530	980405		0.895	1.49	0.53		2.032	1.472		0.91	0.605	1.105	3.057		1.086	0.957897
P21709	Ephrin type-A receptor 1 OS=Homo sapiens OX=9606 GN=EPHA1 PE=1 SV=4	EPHA1	6	3	12	3	108.1	2.42997e+06	2.16697e+06	1.71566e+06	490241	1.8626e+06	1.61059e+06	2.2244e+06	1.14723e+06	1.09799e+06	1.25255e+06	1.49684e+06	5.3084e+06	1.21	2.13	1.386	0.403	1.69	0.662	1.519	0.982	0.847	0.739	1.274	2.568	1.466	0.753856
B3EWG6	Protein FAM25G OS=Homo sapiens OX=9606 GN=FAM25G PE=3 SV=1	FAM25G	52	3	3	3	9.3										5.15222e+06												1.12
Q08830	Fibrinogen-like protein 1 OS=Homo sapiens OX=9606 GN=FGL1 PE=1 SV=3	FGL1	7	2	4	2	36.4	2.16242e+06	341865	800106	332140	1.59356e+06	2.05801e+06	849214	311531	802830	205594	519699		2.255	0.704	1.354	0.572	3.029	1.773	1.215	0.559	1.298	0.254	0.927		0.608	0.0472361
P15328	Folate receptor alpha OS=Homo sapiens OX=9606 GN=FOLR1 PE=1 SV=3	FOLR1	4	1	1	1	29.8									939061
P16401	Histone H1.5 OS=Homo sapiens OX=9606 GN=H1-5 PE=1 SV=3	H1-5	19	5	25	4	22.6	5.96721e+07		369592	358048	1.49714e+06	319307	114796	604326	1.37474e+06	8.24662e+06	1.34788e+06	1.4515e+06	8.239		0.083	0.082	0.377	0.036	0.022	0.144	0.294	1.349	0.318	0.195	5.251	0.966777
P05114	Non-histone chromosomal protein HMG-14 OS=Homo sapiens OX=9606 GN=HMGN1 PE=1 SV=3	HMGN1	44	5	9	5	10.7	2.45437e+07	1.3649e+06	2.69921e+06	3.46237e+06	1.04013e+07	4.08688e+06	2.0065e+06	914727	7.43757e+06	8.89684e+06	8.85728e+06	3.25015e+06	3.575	0.393	0.638	0.834	2.761	0.492	0.401	0.229	1.68	1.535	2.206	0.46	1.15	0.616951
P01889	HLA class I histocompatibility antigen, B alpha chain OS=Homo sapiens OX=9606 GN=HLA-B PE=1 SV=3	HLA-B	15	4	18	1	40.4					515899	3.64605e+06				1.48505e+06		2.21758e+06
P00739	Haptoglobin-related protein OS=Homo sapiens OX=9606 GN=HPR PE=2 SV=2	HPR	55	28	823	6	39	1.23717e+07	5.28104e+06	8.99125e+06	3.87366e+06	2.70246e+07	6.50481e+06	1.79135e+07	8.92604e+06	2.81085e+07	6.11559e+06	2.73654e+07	1.08929e+07	0.86	0.725	1.014	0.445	3.422	0.373	1.707	1.067	3.027	0.503	3.251	0.736	1.749	0.0361364
Q16666	Gamma-interferon-inducible protein 16 OS=Homo sapiens OX=9606 GN=IFI16 PE=1 SV=3	IFI16	4	3	4	3	88.2	2.71914e+06		353135	6462.66				1945.17	345202	2.01421e+06	4252.16	270950	3.6		0.759	0.014				0.004	0.709	3.159	0.01	0.349	113.288	0.508005
P31947	14-3-3 protein sigma OS=Homo sapiens OX=9606 GN=SFN PE=1 SV=1	SFN	47	10	42	6	27.8	5.1909e+06	4.12136e+06	3.6619e+06	7.70569e+06	3.57749e+06	1.52685e+07	6.29643e+06	3.92424e+06	3.05052e+06	56312038	4.3431e+06	9.04602e+06	0.481	0.754	0.551	1.18	0.604	1.169	0.8	0.625	0.438	6.181	0.688	0.815	1.727	0.449536
P01019	Angiotensinogen OS=Homo sapiens OX=9606 GN=AGT PE=1 SV=1	AGT	47	23	559	23	53.1	2.45497e+09	5.08918e+08	1.17337e+09	7.94589e+08	1.22491e+09	1.44706e+09	1.57166e+09	5.0735e+08	7.13935e+08	8.92994e+08	9.37429e+08	1.05592e+09	2.098	0.859	1.627	1.122	1.908	1.022	1.842	0.746	0.946	0.904	1.37	0.877	0.785	0.0119936
P29692	Elongation factor 1-delta OS=Homo sapiens OX=9606 GN=EEF1D PE=1 SV=5	EEF1D	17	3	4	3	31.1	8.06437e+06				463010	1.43905e+06	974801			223032			3.416				0.357	0.504	0.566			0.112			0.166
P36980	Complement factor H-related protein 2 OS=Homo sapiens OX=9606 GN=CFHR2 PE=1 SV=1	CFHR2	50	10	288	4	30.6	4.10082e+07	1.41929e+07	3.25755e+07	3.81817e+06	3.96514e+07	1.0197e+08	3.60901e+07	1.3535e+07	2.34523e+07	2.44581e+06	4.72048e+07	1.02284e+08	1.016	0.694	1.309	0.156	1.79	2.087	1.226	0.577	0.901	0.072	1.999	2.463	0.914	0.393878
Q03591	Complement factor H-related protein 1 OS=Homo sapiens OX=9606 GN=CFHR1 PE=1 SV=2	CFHR1	55	15	316	4	37.6	1.1645e+08	2.94518e+07	6.0019e+07	6.04304e+07	5.3783e+08	5.3549e+08	1.31628e+08	4.46829e+07	5.14937e+07	9.1959e+07	5.4978e+08	6.87989e+08	0.456	0.228	0.382	0.391	3.84	1.733	0.707	0.301	0.313	0.427	3.683	2.62	1.209	0.1816
P19440	Glutathione hydrolase 1 proenzyme OS=Homo sapiens OX=9606 GN=GGT1 PE=1 SV=2	GGT1	7	4	9	4	61.4		1.10666e+06	3.57503e+06	2.70449e+06	1.78791e+06	3.81948e+06	1.66034e+06	1.93606e+06	1.53387e+07	2.29529e+06	1.3902e+06	3.04927e+06		0.588	1.561	1.203	0.877	0.849	0.613	0.896	6.399	0.732	0.64	0.798	1.58	0.604733
Q9NZH0	G-protein coupled receptor family C group 5 member B OS=Homo sapiens OX=9606 GN=GPRC5B PE=2 SV=2	GPRC5B	3	1	4	1	44.8	3.0959e+06			6.89766e+06			1.5446e+06			3.60247e+06		839303
Q02413	Desmoglein-1 OS=Homo sapiens OX=9606 GN=DSG1 PE=1 SV=2	DSG1	4	4	9	4	113.7	1.16294e+06	525669	825403	544246	1.1708e+06	3.23229e+06	1.2258e+06	737528	1.20682e+06	5.0594e+06	2.72191e+06	2.15749e+06	0.642	0.573	0.739	0.496	1.177	1.474	0.928	0.7	1.032	3.307	2.568	1.157	2.283	0.122711
P01877	Immunoglobulin heavy constant alpha 2 OS=Homo sapiens OX=9606 GN=IGHA2 PE=1 SV=4	IGHA2	53	18	876	4	36.6	5.39414e+07	9.5586e+07	1.48163e+07	4.5123e+07	3.0513e+07	1.14256e+08	6.52482e+07	9.2185e+07	1.81325e+07	2.94504e+07	2.36836e+07	5.22425e+07	0.964	3.373	0.43	1.333	0.994	1.687	1.599	2.834	0.502	0.623	0.724	0.907	0.9	0.345847
P19823	Inter-alpha-trypsin inhibitor heavy chain H2 OS=Homo sapiens OX=9606 GN=ITIH2 PE=1 SV=2	ITIH2	31	30	443	30	106.4	1.58242e+09	1.60145e+09	2.38036e+09	1.157e+09	1.5612e+09	1.16475e+09	1.32999e+09	1.25319e+09	1.71913e+09	1.30178e+09	1.57371e+09	1.18045e+09	1.009	2.016	2.462	1.219	1.814	0.614	1.163	1.374	1.699	0.983	1.715	0.731	0.911	0.290954
P13798	Acylamino-acid-releasing enzyme OS=Homo sapiens OX=9606 GN=APEH PE=1 SV=4	APEH	4	3	7	3	81.2	1.92288e+06	132160	1.35807e+06	413618	78760.4	1.22937e+06	1.13407e+06		2.01924e+06	994206	166747	1.3853e+06	1.847	0.251	2.116	0.656	0.138	0.976	1.494		3.006	1.131	0.274	1.293	1.453	0.0974316
P52209	6-phosphogluconate dehydrogenase, decarboxylating OS=Homo sapiens OX=9606 GN=PGD PE=1 SV=3	PGD	19	7	16	7	53.1	2.30479e+06	105808	127353	423592	77942.9	580893		98106.6	2.09915e+06	1.78576e+07	248301	350745	0.988	0.09	0.089	0.3	0.061	0.206		0.072	1.395	9.067	0.182	0.146	10.078	0.154139
P53396	ATP-citrate synthase OS=Homo sapiens OX=9606 GN=ACLY PE=1 SV=3	ACLY	3	3	3	3	120.8	2.84165e+06		343599	3.7127e+06	213776	3.72419e+06	1.41225e+06		234944		5.83596e+06	3.5797e+06	1.105		0.217	2.385	0.151	1.196	0.753		0.142		3.879	1.353	7.039	0.518269
P22748	Carbonic anhydrase 4 OS=Homo sapiens OX=9606 GN=CA4 PE=1 SV=2	CA4	5	2	4	2	35				109235		1.40668e+06			101672	327244		1.5634e+06				0.243		1.567			0.212	0.523		2.049	1.73	0.285735
P05160	Coagulation factor XIII B chain OS=Homo sapiens OX=9606 GN=F13B PE=1 SV=3	F13B	34	16	99	16	75.5	9.15198e+06	1.35591e+07	2.25057e+07	7.65138e+06	2.31e+07	8.85304e+07	2.52635e+07	1.22956e+07	2.5631e+07	2.3521e+07	2.9867e+07	1.23034e+08	0.257	0.752	1.026	0.355	1.183	2.055	0.973	0.594	1.116	0.783	1.434	3.359	1.786	0.110509
P00742	Coagulation factor X OS=Homo sapiens OX=9606 GN=F10 PE=1 SV=2	F10	23	10	86	10	54.7	2.3043e+07	1.92005e+07	2.52822e+07	1.4502e+07	5.48464e+07	4.70817e+07	4.27786e+07	1.58772e+07	1.6335e+07	3.95166e+07	5.85373e+07	6.7273e+07	0.616	1.014	1.097	0.641	2.674	1.041	1.57	0.731	0.677	1.252	2.678	1.749	1.42	0.392013
Q12805	EGF-containing fibulin-like extracellular matrix protein 1 OS=Homo sapiens OX=9606 GN=EFEMP1 PE=1 SV=2	EFEMP1	49	21	383	5	54.6	3.65805e+08	2.63802e+08	3.01194e+08	2.33745e+08	2.28644e+08	1.38774e+09	3.18364e+08	2.84346e+08	2.57592e+08	3.85244e+08	2.97594e+08	1.13587e+09	0.76	1.083	1.016	0.803	0.866	2.384	0.908	1.017	0.83	0.949	1.058	2.295	1.053	0.575344
Q86V85	Integral membrane protein GPR180 OS=Homo sapiens OX=9606 GN=GPR180 PE=2 SV=1	GPR180	9	3	26	3	49.4	9.11647e+06	729105	1.10579e+06	646893	4.0423e+06	8.43994e+06	2.41804e+06	515092	1.97949e+06		2.6151e+06	8.03873e+06	2.392	0.378	0.471	0.281	1.933	1.83	0.87	0.233	0.805		1.173	2.051	0.883	0.373669
P01344	Insulin-like growth factor II OS=Homo sapiens OX=9606 GN=IGF2 PE=1 SV=1	IGF2	5	1	12	1	20.1	4.7057e+06	5.29327e+06	3.24275e+06	676902	5.20131e+06	1.49031e+07	2.62329e+06	2.92992e+06	2.21904e+06	1954588	6.8988e+06	7.32838e+06
Q8TD06	Anterior gradient protein 3 OS=Homo sapiens OX=9606 GN=AGR3 PE=1 SV=1	AGR3	39	6	9	5	19.2	8.72809e+06	3.33674e+06		1.88694e+06	1.39484e+06	4.4451e+06	9.49814e+06	3.40896e+06		3.50717e+06	3.84871e+06	2.66053e+07	1.238	0.935		0.443	0.361	0.521	1.849	0.832		0.59	0.934	3.669	2.669	0.123979
P08571	Monocyte differentiation antigen CD14 OS=Homo sapiens OX=9606 GN=CD14 PE=1 SV=2	CD14	54	14	169	14	40.1	1.99584e+08	1.31039e+08	1.44374e+08	2.31606e+08	1.51738e+08	3.12195e+08	1.48674e+08	1.5085e+08	1.0361e+08	2.1535e+08	1.40122e+08	1.956e+08	1.066	1.382	1.251	2.045	1.477	1.378	1.089	1.386	0.858	1.363	1.28	1.016	0.83	0.047658
P10645	Chromogranin-A OS=Homo sapiens OX=9606 GN=CHGA PE=1 SV=7	CHGA	44	14	78	14	50.7	1.35312e+07	758614	2.15554e+07	6.2173e+06	2.38537e+07	7.89669e+07	3.34857e+07	4.5217e+06	2.54878e+07	1.8426e+07	2.94403e+07	1.09159e+08	0.42	0.047	1.086	0.319	1.35	2.027	1.427	0.242	1.227	0.678	1.564	3.296	2.431	0.0321435
P06681	Complement C2 OS=Homo sapiens OX=9606 GN=C2 PE=1 SV=2	C2	37	23	323	8	83.2	3.66622e+07	1.90886e+07	3.3843e+07	3.0715e+07	7.71686e+07	7.0321e+07	4.02167e+07	2.51727e+07	2.56622e+07	4.04372e+07	5.55516e+07	6.02785e+07	0.808	0.831	1.21	1.119	3.099	1.28	1.216	0.954	0.877	1.056	2.093	1.291	1.001	0.777129
Q15417	Calponin-3 OS=Homo sapiens OX=9606 GN=CNN3 PE=1 SV=1	CNN3	3	1	2	1	36.4												2.03783e+06
P21964	Catechol O-methyltransferase OS=Homo sapiens OX=9606 GN=COMT PE=1 SV=2	COMT	3	1	1	1	30								49882.9	53760.1	239584
Q01459	Di-N-acetylchitobiase OS=Homo sapiens OX=9606 GN=CTBS PE=1 SV=1	CTBS	24	8	73	8	43.7	4.01697e+07	2.37972e+07	2.34558e+07	7.52592e+07	1.1775e+07	2.2976e+07	2.14955e+07	2.5386e+07	2.62393e+07	4.3769e+07	1.02642e+07	1.4102e+07	1.346	1.575	1.276	4.168	0.719	0.636	0.988	1.463	1.363	1.738	0.588	0.459	0.781	0.0825513
Q9UBQ5	Eukaryotic translation initiation factor 3 subunit K OS=Homo sapiens OX=9606 GN=EIF3K PE=1 SV=1	EIF3K	3	1	1	1	25
O94919	Endonuclease domain-containing 1 protein OS=Homo sapiens OX=9606 GN=ENDOD1 PE=1 SV=2	ENDOD1	38	18	168	18	55	6.81837e+07	4.19809e+07	5.57739e+07	7.33967e+07	1.46829e+07	8.79311e+07	5.82763e+07	7.51862e+07	4.67795e+07	6.70157e+07	2.49977e+07	5.26423e+07	1.161	1.411	1.54	2.065	0.455	1.237	1.361	2.201	1.234	1.351	0.727	0.871	1.082	0.941283
Q8NI99	Angiopoietin-related protein 6 OS=Homo sapiens OX=9606 GN=ANGPTL6 PE=1 SV=1	ANGPTL6	17	5	23	4	51.7	1.67101e+06	202903	1.85831e+06	554516	205828	3.60231e+06	3.03571e+06	239031	642441		134718	3.06484e+06	1.143	0.274	2.062	0.627	0.257	2.036	2.848	0.281	0.681		0.158	2.038	1.093	0.713691
Q9UKU9	Angiopoietin-related protein 2 OS=Homo sapiens OX=9606 GN=ANGPTL2 PE=1 SV=1	ANGPTL2	25	10	94	9	57.1	1.90215e+07	1.31632e+07	2.31009e+07	3.46724e+07	1.42499e+07	6.03538e+07	1.56974e+07	1.79957e+07	2.4417e+07	5.53245e+07	1.40095e+07	5.26685e+07	0.626	0.856	1.234	1.887	0.855	1.642	0.709	1.019	1.247	2.158	0.789	1.686	1.071	0.157648
P55290	Cadherin-13 OS=Homo sapiens OX=9606 GN=CDH13 PE=1 SV=1	CDH13	20	12	113	12	78.2	4.6791e+07	4.25657e+07	4.29182e+07	2.72599e+07	3.58559e+07	1.4343e+08	4.32486e+07	4.50552e+07	1.93319e+07	1.0151e+07	3.83391e+07	8.19001e+07	0.921	1.654	1.37	0.886	1.286	2.332	1.167	1.525	0.59	0.237	1.29	1.566	0.76	0.154536
O00299	Chloride intracellular channel protein 1 OS=Homo sapiens OX=9606 GN=CLIC1 PE=1 SV=4	CLIC1	26	5	15	5	26.9	8.82881e+06	144555		170965	210903	5.4062e+06	376653	194059	780326	1.49738e+06	140506	1.70659e+06	4.721	0.153		0.151	0.206	2.389	0.276	0.179	0.647	0.949	0.128	0.887	1.701	0.576776
O94985	Calsyntenin-1 OS=Homo sapiens OX=9606 GN=CLSTN1 PE=1 SV=1	CLSTN1	1	1	3	1	109.7
Q14118	Dystroglycan OS=Homo sapiens OX=9606 GN=DAG1 PE=1 SV=2	DAG1	19	10	175	10	97.4	6.22286e+07	5.28633e+07	6.50544e+07	1.37121e+07	6.14558e+07	4.88064e+08	8.58482e+07	3.65185e+07	4.08474e+07	2.81044e+07	6.11434e+07	3.33347e+08	0.531	0.891	0.901	0.194	0.956	3.444	1.006	0.536	0.541	0.284	0.893	2.767	1.05	0.814698
Q9P219	Protein Daple OS=Homo sapiens OX=9606 GN=CCDC88C PE=1 SV=3	CCDC88C	1	1	4	1	228.1	2.59095e+06			2.14183e+06	366213		4.72441e+06		152857	4.41151e+06	322306	74794.3
O15371	Eukaryotic translation initiation factor 3 subunit D OS=Homo sapiens OX=9606 GN=EIF3D PE=1 SV=1	EIF3D	2	1	1	1	63.9	655840
Q9NQ84	G-protein coupled receptor family C group 5 member C OS=Homo sapiens OX=9606 GN=GPRC5C PE=1 SV=2	GPRC5C	9	3	15	3	48.2	3.34321e+06	575764	1.26169e+06	8.00106e+06	256394	781897	292638	1.84408e+06	5.003e+06	4.51526e+06	230565	306514	1.437	0.489	0.88	5.683	0.201	0.278	0.173	1.363	3.333	2.299	0.169	0.128	1.4	0.631236
P31946	14-3-3 protein beta/alpha OS=Homo sapiens OX=9606 GN=YWHAB PE=1 SV=3	YWHAB	36	9	50	3	28.1	6.95213e+06	873824	2.91092e+06	1.5739e+06	1.36757e+06	7.85184e+06	1.11471e+06	1.15904e+06	1.69181e+06	11698318	979003	5.61739e+06	1.802	0.447	1.224	0.674	0.646	1.682	0.396	0.517	0.68	3.592	0.434	1.415	1.462	0.753416
P61769	Beta-2-microglobulin OS=Homo sapiens OX=9606 GN=B2M PE=1 SV=1	B2M	65	23	1697	23	13.7	4.3362e+09	5.56511e+09	9.30014e+09	1.6833e+09	7.25032e+09	2.23511e+10	7.94206e+09	3.30075e+09	4.39809e+09	2.44452e+09	7.10462e+09	1.30889e+10	0.554	1.405	1.93	0.356	1.69	2.362	1.393	0.726	0.872	0.37	1.553	1.627	1.022	0.557702
P05156	Complement factor I OS=Homo sapiens OX=9606 GN=CFI PE=1 SV=2	CFI	43	26	450	26	65.7	3.47034e+08	1.49349e+08	2.2062e+08	2.04789e+08	6.47858e+08	3.34451e+08	2.63847e+08	1.44012e+08	1.76112e+08	2.95448e+08	4.13632e+08	3.89467e+08	1.098	0.933	1.133	1.071	3.737	0.875	1.145	0.784	0.864	1.108	2.238	1.198	0.941	0.457424
Q9H2X0	Chordin OS=Homo sapiens OX=9606 GN=CHRD PE=1 SV=2	CHRD	2	1	1	1	102
Q01523	Defensin-5 OS=Homo sapiens OX=9606 GN=DEFA5 PE=1 SV=1	DEFA5	13	1	6	1	10.1	2.27411e+06	1.03433e+06	1.12046e+06		3.63478e+06	7.45148e+06	5.05615e+06	805088			7.10131e+06	7.77067e+06
P21128	Poly(U)-specific endoribonuclease OS=Homo sapiens OX=9606 GN=ENDOU PE=1 SV=2	ENDOU	3	1	1	1	46.8			335407							582063
P01876	Immunoglobulin heavy constant alpha 1 OS=Homo sapiens OX=9606 GN=IGHA1 PE=1 SV=2	IGHA1	68	38	2107	21	37.6	9.84831e+09	1.06759e+10	1.55498e+09	5.85106e+09	7.54487e+09	9.20292e+09	1.02856e+10	1.1115e+10	1.77939e+09	5.98566e+09	7.18325e+09	1.04998e+10	1.221	2.614	0.313	1.199	1.705	0.943	1.75	2.371	0.342	0.879	1.523	1.266	1.067	0.740135
P0DP01	Immunoglobulin heavy variable 1-8 OS=Homo sapiens OX=9606 GN=IGHV1-8 PE=3 SV=1	IGHV1-8	35	9	229	1	13	1.42284e+06	993235	655548	1.76304e+06	595492		1.67341e+06	1.33264e+06	544958	1.64092e+06	613760
A0A0C4DH30	Probable non-functional immunoglobulin heavy variable 3-16 OS=Homo sapiens OX=9606 GN=IGHV3-16 PE=1 SV=1	IGHV3-16	33	7	243	1	13.1	1.78553e+06	3.69054e+06	551053	1.10778e+06	1.7859e+06	1.67224e+06	1.75595e+06	3.01439e+06	2.56183e+06	1.0661e+06	2.91352e+06	2.63933e+06
A0A0C4DH32	Immunoglobulin heavy variable 3-20 OS=Homo sapiens OX=9606 GN=IGHV3-20 PE=3 SV=2	IGHV3-20	42	5	150	4	12.7	9.03709e+07	1.76514e+07	2.48889e+07	7.70118e+07	1.79003e+07	3.61151e+07	9.04958e+07	2.07607e+07	2.82415e+07	7.87554e+07	3.15954e+07	4.77356e+07	1.827	0.705	0.816	2.573	0.659	0.603	2.509	0.722	0.885	1.886	1.092	0.938	1.238	0.216856
P01764	Immunoglobulin heavy variable 3-23 OS=Homo sapiens OX=9606 GN=IGHV3-23 PE=1 SV=2	IGHV3-23	61	14	445	1	12.6	1.02313e+09	7.67743e+08	4.16955e+08	4.97623e+08	9.97637e+08	6.02887e+08	1.16177e+09	8.39324e+08	4.59642e+08	5.50153e+08	1.1002e+09	6.96909e+08
Q14566	DNA replication licensing factor MCM6 OS=Homo sapiens OX=9606 GN=MCM6 PE=1 SV=1	MCM6	3	2	2	2	92.8	1.65272e+06												0.946
P40926	Malate dehydrogenase, mitochondrial OS=Homo sapiens OX=9606 GN=MDH2 PE=1 SV=3	MDH2	13	4	5	4	35.5	8.77229e+06	1.49076e+06	2.30097e+06	298639	2.62725e+06	389849	1.21334e+06		271322		1.93718e+06	1.74351e+06	3.943	1.323	1.678	0.222	2.152	0.145	0.748		0.189		1.489	0.762	1.562	0.509592
P33993	DNA replication licensing factor MCM7 OS=Homo sapiens OX=9606 GN=MCM7 PE=1 SV=4	MCM7	4	3	4	3	81.3	1.98605e+06		531559	845863			785287	558237	390322	726177	453544	93077.9	2.654		1.153	1.868			1.44	1.283	0.809	1.15	1.036	0.121	0.62	0.0227532
Q9NX58	Cell growth-regulating nucleolar protein OS=Homo sapiens OX=9606 GN=LYAR PE=1 SV=2	LYAR	2	1	1	1	43.6	165104	190441		132553	106544		213342			92494.9	103922
P27816	Microtubule-associated protein 4 OS=Homo sapiens OX=9606 GN=MAP4 PE=1 SV=3	MAP4	1	1	1	1	120.9	717675	153564	413702						280487	917241
P08727	Keratin, type I cytoskeletal 19 OS=Homo sapiens OX=9606 GN=KRT19 PE=1 SV=4	KRT19	24	10	67	5	44.1		1.41966e+06	1.16694e+07	4.12933e+06	7.84079e+06	1.60362e+07	6.19275e+06	4.84656e+06	1.52016e+07	4.33515e+08	8.43544e+06	1.30474e+07		0.056	0.377	0.136	0.285	0.264	0.169	0.166	0.469	10.229	0.287	0.253	16.277	0.247354
P53990	IST1 homolog OS=Homo sapiens OX=9606 GN=IST1 PE=1 SV=1	IST1	15	5	11	5	39.7	4.39222e+06	1.3845e+06	3.14373e+06	4.82788e+06	1.24265e+06	1.5275e+06	3.52821e+06	1.8184e+06	4.85546e+06	4.22704e+06	1.00976e+06	357521	1.543	0.96	1.792	2.803	0.796	0.443	1.7	1.099	2.644	1.759	0.606	0.122	0.898	0.382732
Q05707	Collagen alpha-1(XIV) chain OS=Homo sapiens OX=9606 GN=COL14A1 PE=1 SV=3	COL14A1	2	3	4	3	193.4	370542		448034		407212	1.12484e+06					418612	3.97829e+06	0.312		0.611		0.624	0.782					0.602	3.252	2.562	0.51603
P49327	Fatty acid synthase OS=Homo sapiens OX=9606 GN=FASN PE=1 SV=3	FASN	3	6	10	6	273.3	4.71706e+06	1.92983e+06	1.47594e+06	3.17154e+06		4.73595e+06	2.60123e+06	1.67696e+06	1.88361e+06	3.2108e+06		3.84666e+06	1.525	1.232	0.774	1.695		1.265	1.154	0.933	0.944	1.23		1.209	0.883	0.215773
Q92820	Gamma-glutamyl hydrolase OS=Homo sapiens OX=9606 GN=GGH PE=1 SV=2	GGH	22	7	78	7	35.9	5.40179e+07	2.25998e+07	2.73034e+07	8.84468e+07	2.51765e+07	2.72994e+07	2.86444e+07	3.1591e+07	2.43555e+07	1.62375e+07	1.86901e+07	1.96903e+07	1.596	1.319	1.309	4.32	1.356	0.667	1.161	1.606	1.116	0.568	0.944	0.566	0.746	0.20136
P22692	Insulin-like growth factor-binding protein 4 OS=Homo sapiens OX=9606 GN=IGFBP4 PE=1 SV=2	IGFBP4	25	5	15	5	27.9	1.88687e+06	498127	1.01021e+06	820796	3.31782e+06	1.33204e+07	2.51946e+06	103133	695303	1.19626e+06	3.43744e+06	1.1308e+07	0.534	0.278	0.464	0.384	1.711	3.114	0.978	0.05	0.305	0.401	1.663	3.11	0.947	0.467657
P05787	Keratin, type II cytoskeletal 8 OS=Homo sapiens OX=9606 GN=KRT8 PE=1 SV=7	KRT8	26	19	103	8	53.7	818825	181544	6.58704e+06	2.1051e+06	2.34283e+06	1.57936e+06	250375	266007	1.11036e+07	3.16553e+06	6.18247e+06	357542	0.266	0.116	3.472	1.13	1.387	0.424	0.112	0.149	5.592	1.218	3.434	0.113	1.189	0.826368
P04746	Pancreatic alpha-amylase OS=Homo sapiens OX=9606 GN=AMY2A PE=1 SV=2	AMY2A	40	16	88	3	57.7	1.29034e+07	9.13054e+06	4.34561e+07	7.7438e+07	1.54786e+07	2.25082e+07	1.40057e+07	1.44324e+07	3.59554e+06	5.57501e+07	6.43335e+06	2.02344e+07	0.496	0.693	2.71	4.918	1.084	0.715	0.738	0.954	0.214	2.538	0.423	0.756	0.818	0.26967
P05089	Arginase-1 OS=Homo sapiens OX=9606 GN=ARG1 PE=1 SV=2	ARG1	2	1	2	1	34.7
P12110	Collagen alpha-2(VI) chain OS=Homo sapiens OX=9606 GN=COL6A2 PE=1 SV=4	COL6A2	6	5	20	5	108.5	620512	524169	347408	3.45578e+06		6.11487e+06	1.24007e+06	620171	288612	5.45258e+06	807677	4.60538e+06	0.268	0.447	0.244	2.468		2.183	0.735	0.461	0.193	2.791	0.597	1.934	1.316	0.504879
P13671	Complement component C6 OS=Homo sapiens OX=9606 GN=C6 PE=1 SV=3	C6	50	36	255	36	104.7	3.85936e+07	1.96918e+07	3.69898e+07	4.85538e+07	3.40858e+08	6.60502e+07	3.33824e+07	1.16676e+07	5.58553e+07	6.17351e+07	2.93568e+08	1.26877e+08	0.386	0.389	0.601	0.803	6.219	0.546	0.458	0.201	0.867	0.732	5.025	1.235	1.188	0.768343
P07360	Complement component C8 gamma chain OS=Homo sapiens OX=9606 GN=C8G PE=1 SV=3	C8G	40	7	59	7	22.3	2.92192e+07	2.80897e+07	2.90682e+07	4.20867e+07	8.31853e+07	2.87809e+07	4.52086e+07	4.61367e+07	3.24405e+07	7.71134e+07	7.80986e+07	4.67773e+07	0.586	1.112	0.946	1.394	3.039	0.477	1.243	1.591	1.008	1.831	2.677	0.911	1.454	0.0620853
P13500	C-C motif chemokine 2 OS=Homo sapiens OX=9606 GN=CCL2 PE=1 SV=1	CCL2	11	1	3	1	11	579059			544992					836641	504620
Q9UP79	A disintegrin and metalloproteinase with thrombospondin motifs 8 OS=Homo sapiens OX=9606 GN=ADAMTS8 PE=2 SV=2	ADAMTS8	2	1	2	1	96.4						2.71963e+06	300120	296801	132718	373776		996699
P02748	Complement component C9 OS=Homo sapiens OX=9606 GN=C9 PE=1 SV=2	C9	46	26	496	26	63.1	1.00101e+09	3.94493e+08	1.04299e+09	7.26908e+08	1.90037e+09	7.53047e+08	7.32811e+08	3.93319e+08	4.69674e+08	5.50637e+08	1.15453e+09	5.95035e+08	1.17	0.91	1.977	1.404	4.047	0.727	1.174	0.79	0.851	0.762	2.306	0.676	0.724	0.0466868
Q86T13	C-type lectin domain family 14 member A OS=Homo sapiens OX=9606 GN=CLEC14A PE=1 SV=1	CLEC14A	7	3	11	3	51.6		496332	1.86979e+06	3.79763e+06	1.21464e+06	6.17881e+06	1.28141e+06		515868	4199064		3.32379e+06		0.365	1.129	2.335	0.824	1.9	0.654		0.298	1.851		1.202	0.563	0.182156
Q12860	Contactin-1 OS=Homo sapiens OX=9606 GN=CNTN1 PE=1 SV=1	CNTN1	3	3	13	3	113.2	1.26243e+08	5.40926e+07	8.21399e+07	7.37461e+07	1.03207e+08	4.89796e+07	5.63433e+07	4.29974e+07	2.48823e+07	3.69071e+07	4.37885e+07	1.56857e+07	2.021	1.71	2.134	1.951	3.011	0.648	1.237	1.184	0.618	0.7	1.199	0.244	0.455	0.00171017
Q16627	C-C motif chemokine 14 OS=Homo sapiens OX=9606 GN=CCL14 PE=1 SV=1	CCL14	59	5	28	5	10.7	12807.8	408466	7370.22		4.79582e+06	2.61421e+07	1.40304e+06	960973		731112	6.31266e+06	4.27801e+07	0.001	0.091	0.001		0.989	2.445	0.218	0.187		0.098	1.222	4.707	55.804	0.248191
Q12864	Cadherin-17 OS=Homo sapiens OX=9606 GN=CDH17 PE=1 SV=3	CDH17	1	1	1	1	92.2			757614			1.4207e+06			267652			679035
P07451	Carbonic anhydrase 3 OS=Homo sapiens OX=9606 GN=CA3 PE=1 SV=3	CA3	61	11	72	11	29.5	1.0622e+07	5.48874e+06	7.05228e+06	1.02821e+07	1.37231e+07	1.57895e+08	1.78957e+07	8.16873e+06	2.22637e+06	1.66751e+07	3.04506e+07	8.20575e+07	0.333	0.339	0.358	0.532	0.783	4.085	0.769	0.44	0.108	0.618	1.63	2.497	1.294	0.88431
P08603	Complement factor H OS=Homo sapiens OX=9606 GN=CFH PE=1 SV=4	CFH	62	73	846	66	139	2.83106e+08	1.9293e+08	3.78804e+08	3.12182e+08	1.28351e+09	8.01952e+08	3.69018e+08	2.54205e+08	5.75972e+08	5.96624e+08	1.1948e+09	1.12681e+09	0.436	0.587	0.947	0.795	3.603	1.021	0.78	0.673	1.375	1.088	3.146	1.687	1.38	0.039583
P04083	Annexin A1 OS=Homo sapiens OX=9606 GN=ANXA1 PE=1 SV=2	ANXA1	53	16	62	16	38.7	3.27823e+07	942912	869090	3.80437e+07	3.23952e+06	6.19072e+06	6.95682e+06		3.20738e+06	2.20233e+08	2.89151e+06	4.60989e+06	1.066	0.061	0.046	2.045	0.192	0.166	0.31		0.162	8.483	0.161	0.146	1.936	0.669099
P54709	Sodium/potassium-transporting ATPase subunit beta-3 OS=Homo sapiens OX=9606 GN=ATP1B3 PE=1 SV=1	ATP1B3	5	1	1	1	31.5	753546					778143		536961				764584
P15289	Arylsulfatase A OS=Homo sapiens OX=9606 GN=ARSA PE=1 SV=3	ARSA	19	6	19	6	53.6	5.49237e+06	112677	3.87812e+06	1.16834e+07	2.86499e+06	2.14579e+06	1.17583e+06	8.84668e+06	9.04631e+06	3.16897e+06		2.10165e+06	1.131	0.046	1.296	3.977	1.075	0.365	0.332	3.134	2.888	0.773		0.421	14.4	0.680752
P15848	Arylsulfatase B OS=Homo sapiens OX=9606 GN=ARSB PE=1 SV=1	ARSB	12	5	10	5	59.6	1.06742e+06	598546	1.07743e+06	1.52001e+06		367204	240165	504049	1.89293e+06	247810		196630	1.309	1.45	2.144	3.081		0.372	0.404	1.063	3.599	0.36		0.234	0.693	0.185184
O15511	Actin-related protein 2/3 complex subunit 5 OS=Homo sapiens OX=9606 GN=ARPC5 PE=1 SV=3	ARPC5	8	1	1	1	16.3										2.04752e+06
P07357	Complement component C8 alpha chain OS=Homo sapiens OX=9606 GN=C8A PE=1 SV=2	C8A	37	14	237	14	65.1	8.26862e+07	6.89199e+07	7.40257e+07	6.53406e+07	2.33748e+08	7.07974e+07	1.32045e+08	8.63903e+07	5.93544e+07	1.18522e+08	2.1351e+08	1.28627e+08	0.704	1.158	1.022	0.919	3.625	0.498	1.541	1.264	0.783	1.195	3.106	1.064	1.39	0.236912
Q9Y240	C-type lectin domain family 11 member A OS=Homo sapiens OX=9606 GN=CLEC11A PE=1 SV=1	CLEC11A	3	1	1	1	35.7					1.03213e+06	736151					955762	878322
P16278	Beta-galactosidase OS=Homo sapiens OX=9606 GN=GLB1 PE=1 SV=2	GLB1	18	9	41	9	76	2.18494e+07	5.25114e+06	1.77109e+07	3.44413e+07	1.65301e+06	8.12839e+06	1.06108e+07	8.75796e+06	2.04564e+07	3.4662e+06	5.41399e+06	2.67178e+06	1.766	0.838	2.323	4.601	0.244	0.543	1.177	1.218	2.564	0.332	0.748	0.21	1.125	0.485911
Q8NFZ8	Cell adhesion molecule 4 OS=Homo sapiens OX=9606 GN=CADM4 PE=1 SV=1	CADM4	13	4	28	4	42.8	4.13926e+06	2.09485e+06	2.33356e+06	5.759e+06	2.2986e+06	3.91857e+06	1.83215e+06	3.36163e+06	1.95576e+06	5.65212e+06	1.90639e+06	2.4682e+06	1.246	1.245	1.139	2.864	1.261	0.974	0.756	1.74	0.912	2.015	0.981	0.722	0.838	0.125605
P07307	Asialoglycoprotein receptor 2 OS=Homo sapiens OX=9606 GN=ASGR2 PE=1 SV=2	ASGR2	35	7	39	7	35.1	2.41795e+07	2.83675e+06	2.95485e+06	1.2847e+06	7.45167e+06	9.59771e+07	8.99744e+06	4.78998e+06		2.39257e+06	6.67759e+06	2.4666e+07	1.381	0.32	0.274	0.121	0.776	4.529	0.705	0.47		0.162	0.652	1.369	0.892	0.410571
O75503	Ceroid-lipofuscinosis neuronal protein 5 OS=Homo sapiens OX=9606 GN=CLN5 PE=1 SV=2	CLN5	4	1	2	1	41.5
P10909	Clusterin OS=Homo sapiens OX=9606 GN=CLU PE=1 SV=1	CLU	41	22	588	22	52.5	4.95599e+08	3.96933e+08	5.84262e+08	6.81156e+08	1.21141e+09	1.12459e+09	8.094e+08	4.68478e+08	4.33007e+08	7.57516e+08	1.19735e+09	1.08101e+09	0.609	0.963	1.164	1.383	2.712	1.141	1.364	0.99	0.825	1.102	2.515	1.291	1.139	0.767532
P07741	Adenine phosphoribosyltransferase OS=Homo sapiens OX=9606 GN=APRT PE=1 SV=2	APRT	6	1	1	1	19.6			652153					829521		630782
P08519	Apolipoprotein(a) OS=Homo sapiens OX=9606 GN=LPA PE=1 SV=1	LPA	16	7	69	3	501			2.64446e+06		767776		3.41383e+06		5.73267e+06						1.293		0.422		1.411		2.677				2.07
P20908	Collagen alpha-1(V) chain OS=Homo sapiens OX=9606 GN=COL5A1 PE=1 SV=3	COL5A1	6	7	15	7	183.4	1.15372e+06	738452	2.09315e+06		2.39463e+06	2.0286e+07	1.85468e+06			861247	945492	4.78235e+07	0.126	0.159	0.37		0.475	1.826	0.277			0.111	0.176	5.063	1.781	0.710841
Q14CN2	Calcium-activated chloride channel regulator 4 OS=Homo sapiens OX=9606 GN=CLCA4 PE=1 SV=2	CLCA4	5	4	5	4	101.2	1.54584e+06			180133	714831	257162				3.73472e+06	1.40767e+06		1.119			0.215	0.943	0.154				3.202	1.742		8.37	0.357756
Q9NQ79	Cartilage acidic protein 1 OS=Homo sapiens OX=9606 GN=CRTAC1 PE=1 SV=2	CRTAC1	31	14	71	14	71.4	7.9308e+06	5.02229e+06	8.7358e+06	4.32794e+06	1.43794e+07	2.28565e+07	1.14749e+07	6.62411e+06	4.12345e+06	4.69343e+06	1.25276e+07	3.01373e+07	0.678	0.847	1.211	0.611	2.239	1.614	1.345	0.974	0.546	0.475	1.83	2.503	1.122	0.992201
P02511	Alpha-crystallin B chain OS=Homo sapiens OX=9606 GN=CRYAB PE=1 SV=2	CRYAB	25	5	19	5	20.1	1.08993e+06		1.96657e+06	526021	2.17391e+06	5.23407e+06	461893	263450	2.1302e+06	4.31884e+06	1.19802e+06	1.71182e+06	0.538		1.575	0.429	1.956	2.135	0.313	0.224	1.63	2.526	1.011	0.821	1.681	0.892853
P30043	Flavin reductase (NADPH) OS=Homo sapiens OX=9606 GN=BLVRB PE=1 SV=3	BLVRB	40	6	39	6	22.1	1.96908e+06	576214	8.13468e+06	2.01226e+06	1.57627e+06	3.52803e+07	1.30097e+07	2.13363e+06	4.87171e+06	4.90028e+06	1.5625e+06	2.84585e+07	0.214	0.124	1.434	0.361	0.312	3.167	1.939	0.399	0.82	0.631	0.29	3.005	2.746	0.246379
Q8N4F0	BPI fold-containing family B member 2 OS=Homo sapiens OX=9606 GN=BPIFB2 PE=1 SV=2	BPIFB2	2	1	1	1	49.1		135220		195081	359994	732059		161435		351752		602068
P12830	Cadherin-1 OS=Homo sapiens OX=9606 GN=CDH1 PE=1 SV=3	CDH1	19	13	126	13	97.4	3.03084e+07	4.13745e+07	2.3085e+07	8.46285e+07	2.26297e+07	1.4404e+08	4.93133e+07	3.51428e+07	1.46619e+07	4.27097e+07	3.68765e+07	9.71497e+07	0.553	1.491	0.684	2.553	0.753	2.172	1.235	1.103	0.415	0.923	1.151	1.723	1.044	0.629894
Q9BRF8	Serine/threonine-protein phosphatase CPPED1 OS=Homo sapiens OX=9606 GN=CPPED1 PE=1 SV=3	CPPED1	4	1	1	1	35.5			874078			1.13653e+06						844867
Q13541	Eukaryotic translation initiation factor 4E-binding protein 1 OS=Homo sapiens OX=9606 GN=EIF4EBP1 PE=1 SV=3	EIF4EBP1	22	1	1	1	12.6	3.5819e+06		1.89085e+06							1.12885e+06
Q15847	Adipogenesis regulatory factor OS=Homo sapiens OX=9606 GN=ADIRF PE=1 SV=1	ADIRF	29	2	13	2	7.9	7.98337e+06	5.12931e+06	3.50103e+06	1.10727e+06	2.2185e+06	1.2107e+07	1.39682e+06		834396	630769	2.17016e+06	8.53741e+06	1.821	2.31	1.296	0.417	0.922	2.282	0.437		0.295	0.17	0.846	1.893	0.524	0.0510048
Q92688	Acidic leucine-rich nuclear phosphoprotein 32 family member B OS=Homo sapiens OX=9606 GN=ANP32B PE=1 SV=1	ANP32B	8	2	4	2	28.8	1.34918e+07	7.43355e+06	8.59565e+06	4.57771e+06	1.09661e+07	4.35021e+06	8.22666e+06	6.14822e+06	8.61272e+06	5.16989e+06	6.1106e+06	4.90384e+06	1.729	1.881	1.787	0.969	2.561	0.461	1.446	1.355	1.711	0.785	1.339	0.611	0.862	0.195034
P20160	Azurocidin OS=Homo sapiens OX=9606 GN=AZU1 PE=1 SV=3	AZU1	39	7	12	7	26.9			1.56092e+06	562249	495046	2.52669e+06	651597		5.09181e+06	6.67037e+07		7.46424e+06			0.225	0.083	0.08	0.186	0.08		0.702	7.03		0.645	30.429	0.170701
Q09666	Neuroblast differentiation-associated protein AHNAK OS=Homo sapiens OX=9606 GN=AHNAK PE=1 SV=2	AHNAK	17	34	40	34	628.7	2.4607e+07	5.18015e+06	1.68866e+07	8.13098e+06	2.11538e+07	1.82406e+07	2.41368e+07	8.84378e+06	1.08537e+07	4.358e+07	2.23321e+07	1.43649e+07	1.279	0.532	1.425	0.699	2.005	0.784	1.721	0.791	0.875	2.684	1.985	0.726	1.534	0.381511
P06727	Apolipoprotein A-IV OS=Homo sapiens OX=9606 GN=APOA4 PE=1 SV=4	APOA4	76	41	2103	41	45.3	2.30537e+09	2.34894e+09	4.06684e+09	4.28505e+09	7.20407e+09	2.01979e+10	8.28696e+09	4.2871e+09	2.85408e+09	7.78149e+09	9.38994e+09	2.20401e+10	0.275	0.554	0.788	0.846	1.568	1.993	1.357	0.881	0.528	1.101	1.917	2.558	1.834	0.200075
P50995	Annexin A11 OS=Homo sapiens OX=9606 GN=ANXA11 PE=1 SV=1	ANXA11	11	5	11	5	54.4	942596			1.74121e+06		145676			249314	1.29731e+06		189314	1.172			3.577		0.15			0.48	1.91		0.229	1.03	0.877698
P15144	Aminopeptidase N OS=Homo sapiens OX=9606 GN=ANPEP PE=1 SV=4	ANPEP	29	26	162	26	109.5	1.20477e+08	4.68341e+07	1.0794e+08	2.94011e+08	3.94747e+07	1.16386e+08	2.71303e+07	2.44078e+08	2.07635e+08	3.75517e+07	7.77846e+07	3.98582e+07	1.006	0.772	1.463	4.058	0.601	0.803	0.311	3.506	2.688	0.371	1.111	0.324	1.505	0.644521
O15335	Chondroadherin OS=Homo sapiens OX=9606 GN=CHAD PE=1 SV=2	CHAD	4	1	1	1	40.5												1.60411e+06
P01024	Complement C3 OS=Homo sapiens OX=9606 GN=C3 PE=1 SV=2	C3	75	162	4079	157	187	6.47766e+09	4.83471e+09	7.16881e+09	7.84789e+09	1.38295e+10	7.08131e+09	6.26958e+09	7.16055e+09	6.70726e+09	1.06785e+10	1.26079e+10	8.59957e+09	0.741	1.092	1.33	1.483	2.882	0.669	0.983	1.408	1.189	1.446	2.465	0.956	1.128	0.322735
Q9UHL4	Dipeptidyl peptidase 2 OS=Homo sapiens OX=9606 GN=DPP7 PE=1 SV=3	DPP7	17	7	37	7	54.3	1.91309e+07	7.77519e+06	1.35076e+07	2.97308e+07	1.18208e+07	1.50727e+07	1.45368e+07	1.14633e+07	1.78336e+07	1.16852e+07	9.45413e+06	1.22832e+07	1.246	1	1.427	3.2	1.403	0.811	1.299	1.284	1.8	0.901	1.053	0.778	0.93	0.47629
P02750	Leucine-rich alpha-2-glycoprotein OS=Homo sapiens OX=9606 GN=LRG1 PE=1 SV=2	LRG1	53	20	502	20	38.2	2.60743e+09	1.14627e+09	1.74673e+09	2.12759e+09	2.17186e+09	1.07683e+09	1.0354e+09	9.88152e+08	1.21276e+09	9.5445e+08	9.5276e+08	5.85697e+08	1.782	1.547	1.937	2.403	2.706	0.608	0.971	1.162	1.285	0.773	1.113	0.389	0.555	0.00501941
Q13444	Disintegrin and metalloproteinase domain-containing protein 15 OS=Homo sapiens OX=9606 GN=ADAM15 PE=1 SV=4	ADAM15	7	4	9	4	92.9	931967		279302		374841	2.21335e+07			275670			1.48193e+07	0.136		0.066		0.1	2.674			0.062			2.106	0.863	0.336975
Q13790	Apolipoprotein F OS=Homo sapiens OX=9606 GN=APOF PE=1 SV=2	APOF	16	4	21	4	35.4		2.15897e+06	9.07734e+06	1.7283e+06	1.18449e+07	2.46561e+08	2.70804e+07	385612		514597	4.44613e+06	1.11268e+08		0.097	0.336	0.065	0.492	4.643	0.847	0.015		0.014	0.173	2.465	0.313	0.0183958
P09525	Annexin A4 OS=Homo sapiens OX=9606 GN=ANXA4 PE=1 SV=4	ANXA4	18	5	10	5	35.9	1.83865e+06	663257	627797	556699	842399	119405	296142	1.06513e+06	1.48504e+06	1.86655e+06	308734		1.978	1.409	1.096	0.99	1.652	0.106	0.437	1.971	2.477	2.379	0.568		1.325	0.835178
P43251	Biotinidase OS=Homo sapiens OX=9606 GN=BTD PE=1 SV=2	BTD	21	9	123	9	61.1	2.81307e+07	4.15852e+07	3.51811e+07	5.01369e+07	2.32607e+07	2.03882e+07	2.75416e+07	4.33989e+07	3.01506e+07	3.44347e+07	1.73161e+07	2.01878e+07	0.859	2.508	1.743	2.53	1.295	0.514	1.154	2.28	1.427	1.246	0.904	0.599	0.905	0.34812
P55957	BH3-interacting domain death agonist OS=Homo sapiens OX=9606 GN=BID PE=1 SV=1	BID	33	5	27	5	22	2.28104e+06	298182	1.80599e+06			7.02637e+06	3.25536e+06	456584	1.79536e+06	308136	358114	4.06458e+06	0.997	0.257	1.28			2.537	1.951	0.343	1.216	0.159	0.268	1.726	1.23	0.604127
P08236	Beta-glucuronidase OS=Homo sapiens OX=9606 GN=GUSB PE=1 SV=2	GUSB	16	8	29	8	74.7	6.09842e+06	1.94184e+06	7.61425e+06	2.33277e+07	935977	3.12709e+06	3.9137e+06	3.63401e+06	6.53424e+06	3.01185e+06	1.72863e+06	5.31797e+06	1.03	0.648	2.087	6.513	0.288	0.437	0.907	1.056	1.711	0.603	0.499	0.873	1.192	0.742605
P12838	Neutrophil defensin 4 OS=Homo sapiens OX=9606 GN=DEFA4 PE=1 SV=2	DEFA4	22	2	5	2	10.5	636729					838447				58017.3	54423.7	958210	1.183					1.287				0.128	0.173	1.73	1.344
O15144	Actin-related protein 2/3 complex subunit 2 OS=Homo sapiens OX=9606 GN=ARPC2 PE=1 SV=1	ARPC2	13	4	12	4	34.3	2.00892e+06		495975	149069		166122			670199	2.81167e+06		284787	2.019		0.809	0.248		0.138			1.044	3.348		0.278	5.602	0.24122
O43866	CD5 antigen-like OS=Homo sapiens OX=9606 GN=CD5L PE=1 SV=1	CD5L	28	7	37	7	38.1	8.70753e+06	4.00456e+06	1.80226e+06	4.53942e+06	5.85448e+06	6.97545e+07	1.9847e+07	2.45147e+06	6.44913e+06	6.6487e+06	7.06825e+06	7.71615e+07	0.461	0.419	0.155	0.397	0.565	3.053	1.442	0.223	0.53	0.417	0.64	3.973	1.761	0.265088
Q9Y6Z7	Collectin-10 OS=Homo sapiens OX=9606 GN=COLEC10 PE=1 SV=2	COLEC10	3	1	2	1	30.7		1.21136e+06	867374		1.39708e+06		678155	451986		240459	1.71593e+06
P46108	Adapter molecule crk OS=Homo sapiens OX=9606 GN=CRK PE=1 SV=2	CRK	13	3	8	3	33.8	1.12609e+06		169650			6.63697e+06	602260	727119			414695	3.80891e+06	0.553		0.135			2.693	0.406	0.614			0.348	1.818	0.705	0.0757475
P04080	Cystatin-B OS=Homo sapiens OX=9606 GN=CSTB PE=1 SV=2	CSTB	70	15	188	15	11.1	9.07807e+07	7.63628e+07	2.22896e+08	7.80332e+07	7.80789e+07	7.2556e+08	1.74755e+08	7.70265e+07	1.82751e+08	2.67671e+08	1.02208e+08	5.96993e+08	0.385	0.64	1.536	0.548	0.604	2.546	1.018	0.563	1.203	1.346	0.742	2.464	1.493	0.254651
Q06481	Amyloid-like protein 2 OS=Homo sapiens OX=9606 GN=APLP2 PE=1 SV=2	APLP2	1	1	1	1	86.9
O95445	Apolipoprotein M OS=Homo sapiens OX=9606 GN=APOM PE=1 SV=2	APOM	27	4	41	4	21.2	4.01768e+06	8.82793e+06	8.18644e+06	7.8419e+06	8.66816e+06	1.27591e+07	6.08807e+06	1.00533e+07	1.04548e+07	8.18784e+06	1.36815e+07	1.30753e+07	0.408	1.769	1.348	1.315	1.603	1.07	0.848	1.755	1.645	0.984	2.374	1.29	1.288	0.21343
Q07075	Glutamyl aminopeptidase OS=Homo sapiens OX=9606 GN=ENPEP PE=1 SV=3	ENPEP	22	21	127	21	109.2	3.33359e+07	5.22882e+06	1.22698e+08	1.34227e+08	1.86814e+07	7.28207e+07	2.66301e+07	2.36184e+07	7.96424e+07	5306875	2.03873e+07	2.98906e+07	0.661	0.205	3.947	4.398	0.675	1.193	0.724	0.806	2.448	0.125	0.691	0.576	1.197	0.452165
P0C0L4	Complement C4-A OS=Homo sapiens OX=9606 GN=C4A PE=1 SV=2	C4A	52	95	1641	6	192.7	2.56446e+09	1.27674e+09	2.22476e+09	1.74274e+09	3.7335e+09	1.55614e+09	2.19696e+09	1.63609e+09	2.2144e+09	1.8366e+09	3.2723e+09	1.58793e+09	1.126	1.107	1.586	1.265	2.989	0.565	1.324	1.236	1.508	0.956	2.457	0.678	1.003	0.886143
Q93088	Betaine--homocysteine S-methyltransferase 1 OS=Homo sapiens OX=9606 GN=BHMT PE=1 SV=2	BHMT	14	5	14	3	45	2.8718e+06	1.94171e+06	1.22704e+06	1.67636e+06	2.04467e+06	2.07167e+06	98542.5	1.17612e+06	4.00782e+06	54642.9	1.44302e+06	476725	1.708	2.28	1.184	1.647	2.216	1.018	0.08	1.203	3.694	0.038	1.467	0.276	0.775	0.128907
P07858	Cathepsin B OS=Homo sapiens OX=9606 GN=CTSB PE=1 SV=3	CTSB	37	13	134	13	37.8	4.08196e+07	2.40026e+07	3.92406e+07	8.24705e+07	2.16452e+07	1.43462e+08	2.84009e+07	3.41896e+07	3.90666e+07	4.25123e+07	2.58442e+07	1.01727e+08	0.743	0.863	1.159	2.482	0.718	2.158	0.709	1.071	1.103	0.917	0.805	1.8	0.912	0.415292
P09668	Pro-cathepsin H OS=Homo sapiens OX=9606 GN=CTSH PE=1 SV=4	CTSH	19	6	63	6	37.4	1.46545e+07	3.7763e+06	2.01493e+07	3.90666e+07	5.64053e+06	7.35486e+06	6.61337e+06	1.2673e+07	1.3991e+07	7.17305e+06	5.9813e+06	2.59324e+06	1.191	0.606	2.657	5.247	0.835	0.494	0.737	1.772	1.763	0.691	0.831	0.205	0.958	0.324161
P08572	Collagen alpha-2(IV) chain OS=Homo sapiens OX=9606 GN=COL4A2 PE=1 SV=4	COL4A2	1	2	14	2	167.4	1.73258e+06	1.12548e+06	1.07941e+06	968771	1.03199e+06	9.14823e+06	1.70833e+06	726549	963576	326230	1.07532e+06	6.21506e+06	0.753	0.966	0.762	0.696	0.818	3.287	1.019	0.543	0.65	0.168	0.8	2.627	0.798	0.210688
O75131	Copine-3 OS=Homo sapiens OX=9606 GN=CPNE3 PE=1 SV=1	CPNE3	5	3	10	3	60.1	6.19114e+06		6.04259e+06	6.82644e+06	3.71781e+06	4.37616e+06	4.60172e+06	3.55909e+06	8.84381e+06	5.34268e+06	4.07117e+06	4.52347e+06	1.109		1.756	2.021	1.214	0.648	1.13	1.096	2.455	1.133	1.247	0.787	1.044	0.996422
Q9Y235	C->U-editing enzyme APOBEC-2 OS=Homo sapiens OX=9606 GN=APOBEC2 PE=1 SV=1	APOBEC2	3	1	4	1	25.7	133368		181782		90800.2	1.47293e+06	213225	76207.4	73932.4	91179.9	304417	806208
Q9P1F3	Costars family protein ABRACL OS=Homo sapiens OX=9606 GN=ABRACL PE=1 SV=1	ABRACL	32	2	4	2	9.1												1.76713e+07												0.919
P02760	Protein AMBP OS=Homo sapiens OX=9606 GN=AMBP PE=1 SV=1	AMBP	58	28	2787	28	39	8.06673e+09	6.22747e+09	7.46193e+09	5.01298e+09	5.44371e+09	1.49739e+10	6.68071e+09	6.20464e+09	7.00331e+09	5.84132e+09	5.51136e+09	1.4026e+10	0.99	1.51	1.486	1.017	1.218	1.519	1.125	1.31	1.333	0.85	1.157	1.674	0.965	0.449757
Q9NZP8	Complement C1r subcomponent-like protein OS=Homo sapiens OX=9606 GN=C1RL PE=1 SV=2	C1RL	20	8	73	8	53.5	4.39368e+07	2.8796e+07	2.49587e+07	5.45434e+07	3.8793e+07	2.57227e+07	3.09456e+07	3.96092e+07	2.141e+07	3.3955e+07	2.49211e+07	2.0286e+07	1.286	1.664	1.185	2.638	2.069	0.622	1.242	1.994	0.971	1.177	1.247	0.577	0.827	0.161067
P50238	Cysteine-rich protein 1 OS=Homo sapiens OX=9606 GN=CRIP1 PE=1 SV=3	CRIP1	45	3	16	3	8.5		3.34405e+06	5.12245e+06		3.45908e+06	3.49688e+07	2.91276e+06	3.96547e+06	5.30771e+06	687898	3.93075e+06	1.40635e+07		0.803	1.011		0.767	3.515	0.486	0.83	1.001	0.099	0.817	1.663	0.891	0.458045
Q14393	Growth arrest-specific protein 6 OS=Homo sapiens OX=9606 GN=GAS6 PE=1 SV=3	GAS6	1	1	2	1	74.9	178501	49479.9	156021	199017					174703	186882
P08311	Cathepsin G OS=Homo sapiens OX=9606 GN=CTSG PE=1 SV=2	CTSG	36	8	13	8	28.8			1.74371e+06	846479		884786			3.09471e+06	2.63487e+07		5.52912e+06			0.418	0.207		0.108			0.708	4.607		0.793	10.431	0.128528
P09871	Complement C1s subcomponent OS=Homo sapiens OX=9606 GN=C1S PE=1 SV=1	C1S	35	22	145	21	76.6	1.67231e+07	9.21426e+06	2.46762e+07	2.15816e+07	2.88637e+07	1.9116e+08	2.37793e+07	2.19828e+07	3.08821e+07	3.16111e+07	2.91969e+07	1.6703e+08	0.318	0.346	0.762	0.678	1.001	3.005	0.62	0.719	0.911	0.712	0.95	3.088	1.375	0.115603
P11597	Cholesteryl ester transfer protein OS=Homo sapiens OX=9606 GN=CETP PE=1 SV=2	CETP	3	1	1	1	54.7						490949		1.87946e+06
P32320	Cytidine deaminase OS=Homo sapiens OX=9606 GN=CDA PE=1 SV=2	CDA	39	3	3	3	16.2		381977			463718		176915			7.30438e+06	391986			0.409			0.458		0.132			4.693	0.364		0.795
P01031	Complement C5 OS=Homo sapiens OX=9606 GN=C5 PE=1 SV=4	C5	26	40	359	40	188.2	1.11932e+08	3.94043e+07	1.1335e+08	1.0682e+08	1.98817e+08	1.31005e+08	1.27357e+08	5.81731e+07	1.13155e+08	9.95716e+07	1.91798e+08	1.67547e+08	0.871	0.605	1.431	1.373	2.819	0.842	1.359	0.779	1.365	0.918	2.551	1.267	1.147	0.524234
Q13838	Spliceosome RNA helicase DDX39B OS=Homo sapiens OX=9606 GN=DDX39B PE=1 SV=1	DDX39B	10	4	4	4	49	4.87225e+06	1.16436e+06		1.12867e+06									1.93	0.911		0.739
Q8IYD1	Eukaryotic peptide chain release factor GTP-binding subunit ERF3B OS=Homo sapiens OX=9606 GN=GSPT2 PE=1 SV=2	GSPT2	3	1	1	1	68.8
Q00688	Peptidyl-prolyl cis-trans isomerase FKBP3 OS=Homo sapiens OX=9606 GN=FKBP3 PE=1 SV=1	FKBP3	6	1	1	1	25.2	633358				246325	192120			183352	143989		335952
P30153	Serine/threonine-protein phosphatase 2A 65 kDa regulatory subunit A alpha isoform OS=Homo sapiens OX=9606 GN=PPP2R1A PE=1 SV=4	PPP2R1A	6	4	6	4	65.3	907783		79533.7	1.30264e+06		549779		65808.5		3.6965e+06	98779.1	331636	0.977		0.139	2.317		0.489		0.122		4.712	0.182	0.347	1.372	0.786585
Q9NP58	ATP-binding cassette sub-family B member 6 OS=Homo sapiens OX=9606 GN=ABCB6 PE=1 SV=1	ABCB6	1	1	4	1	93.8	8.13502e+06					235714				10049774		208139
P27482	Calmodulin-like protein 3 OS=Homo sapiens OX=9606 GN=CALML3 PE=1 SV=2	CALML3	65	10	13	8	16.9	2.48789e+07		2.34317e+06			1.30221e+07	123122		1.48121e+06	2.29835e+07		1.27701e+07	2.123		0.324			0.918	0.014		0.196	2.323		1.059	0.588	0.384611
P09326	CD48 antigen OS=Homo sapiens OX=9606 GN=CD48 PE=1 SV=2	CD48	8	2	2	2	27.7	193338					1.56467e+06				239835			0.275					1.836				0.404
P19022	Cadherin-2 OS=Homo sapiens OX=9606 GN=CDH2 PE=1 SV=4	CDH2	8	7	27	7	99.7	1.26472e+07	4.60522e+06	1.00048e+07	8.45245e+06	1.49641e+07	6.96999e+07	8.97441e+06	6.93194e+06	3.43876e+06	6.26153e+06	7.99258e+06	6.28158e+07	0.662	0.476	0.85	0.731	1.428	3.015	0.645	0.624	0.279	0.388	0.715	3.197	0.784	0.164878
O75339	Cartilage intermediate layer protein 1 OS=Homo sapiens OX=9606 GN=CILP PE=1 SV=4	CILP	1	1	2	1	132.5						1.89337e+06
Q5KU26	Collectin-12 OS=Homo sapiens OX=9606 GN=COLEC12 PE=1 SV=3	COLEC12	2	1	13	1	81.5	9.74039e+06	3.34617e+06	2.27945e+06	675963	2.28691e+06	8.29654e+06	1.7148e+06	845819	863814	564198	1.7221e+06	5.7796e+06
P15924	Desmoplakin OS=Homo sapiens OX=9606 GN=DSP PE=1 SV=3	DSP	19	53	61	53	331.6	2.17664e+07	1.52036e+07	5.99165e+06	1.92207e+07	1.4635e+07	3.97105e+07	3.34858e+07	9.3041e+06	1.44687e+07	1.73318e+08	1.03415e+07	3.59714e+07	0.628	0.866	0.28	0.916	0.77	0.947	1.325	0.462	0.647	5.923	0.51	1.009	2.191	0.325382
P16444	Dipeptidase 1 OS=Homo sapiens OX=9606 GN=DPEP1 PE=1 SV=3	DPEP1	6	2	2	2	45.6				351095					440183		330003					1.468					1.727		1.428
P00352	Retinal dehydrogenase 1 OS=Homo sapiens OX=9606 GN=ALDH1A1 PE=1 SV=2	ALDH1A1	30	11	43	10	54.8	6.57116e+06	1.65953e+06	1.17697e+07	2.62538e+06	4.87524e+06	3.84153e+06	1.69383e+06	904188	1.88442e+07	2.83719e+06	3.24564e+06	4.07386e+06	1.185	0.591	3.444	0.782	1.602	0.572	0.419	0.28	5.268	0.606	1.001	0.714	0.834	0.232929
O00468	Agrin OS=Homo sapiens OX=9606 GN=AGRN PE=1 SV=6	AGRN	6	9	88	1	217.2	1.47529e+08	9.13607e+07	1.4128e+08	8.88556e+07	4.10165e+07	1.7207e+08	1.2093e+08	1.26197e+08	1.81982e+08	1.23864e+08	4.81008e+07	1.07198e+08
P68133	Actin, alpha skeletal muscle OS=Homo sapiens OX=9606 GN=ACTA1 PE=1 SV=1	ACTA1	25	12	155	1	42	2.19153e+07	7.71939e+06	4.4152e+07	2.39286e+07	1.46577e+07	2.42684e+07	1.15531e+07	1.06501e+07	4.58819e+07	6.59265e+07	1.30943e+07	2.33916e+07
Q10567	AP-1 complex subunit beta-1 OS=Homo sapiens OX=9606 GN=AP1B1 PE=1 SV=2	AP1B1	3	2	2	2	104.6	1.60609e+06	1.66153e+06	4.00168e+06	1.13524e+06	1.06312e+06		882589	1.77946e+06	2.32822e+06	1.00805e+06			0.884	1.806	3.574	1.033	1.067		0.666	1.685	1.987	0.657			0.72	0.0527328
Q9BY67	Cell adhesion molecule 1 OS=Homo sapiens OX=9606 GN=CADM1 PE=1 SV=2	CADM1	11	3	6	3	48.5				889924												1.563
P10606	Cytochrome c oxidase subunit 5B, mitochondrial OS=Homo sapiens OX=9606 GN=COX5B PE=1 SV=2	COX5B	6	1	1	1	13.7	2.07491e+06					235782
O43143	Pre-mRNA-splicing factor ATP-dependent RNA helicase DHX15 OS=Homo sapiens OX=9606 GN=DHX15 PE=1 SV=2	DHX15	4	3	3	3	90.9	3.0658e+06	92035.3	166539	92932.2		1.24948e+06	77216.4	116464	98908.2	104462	160978		5.55	0.329	0.489	0.278		1.869	0.192	0.363	0.278	0.224	0.498		0.628	0.293253
P07148	Fatty acid-binding protein, liver OS=Homo sapiens OX=9606 GN=FABP1 PE=1 SV=1	FABP1	73	10	150	10	14.2	2.74308e+08	1.97727e+08	1.02352e+08	8.64551e+07	8.42111e+07	3.46171e+08	1.473e+08	1.68815e+08	9.46837e+07	1.64728e+08	6.03052e+07	2.76514e+08	1.554	2.212	0.941	0.809	0.869	1.62	1.145	1.645	0.832	1.105	0.584	1.523	0.89	0.223459
P28838	Cytosol aminopeptidase OS=Homo sapiens OX=9606 GN=LAP3 PE=1 SV=3	LAP3	5	3	3	3	56.1	1.38287e+06		414614	334142	159894	362679	179958	104258	265922	300978		575201	3.206		1.559	1.28	0.676	0.695	0.572	0.416	0.956	0.826		1.296	0.825	0.368304
Q8WVQ1	Soluble calcium-activated nucleotidase 1 OS=Homo sapiens OX=9606 GN=CANT1 PE=1 SV=1	CANT1	6	2	5	2	44.8	87026.3	143820	305016	455979		2.58201e+06	104848		103634	457231	150331	1.76652e+06	0.134	0.436	0.76	1.158		3.278	0.221		0.247	0.832	0.395	2.638	0.874	0.443335
P02452	Collagen alpha-1(I) chain OS=Homo sapiens OX=9606 GN=COL1A1 PE=1 SV=5	COL1A1	1	2	4	2	138.9						421667						2.24028e+06						0.248						1.547	6.238
P04406	Glyceraldehyde-3-phosphate dehydrogenase OS=Homo sapiens OX=9606 GN=GAPDH PE=1 SV=3	GAPDH	39	16	114	16	36	6.36982e+08	2.92548e+08	5.06357e+08	2.53158e+08	3.35363e+08	2.74892e+08	2.33607e+08	2.01054e+08	3.50149e+08	3.51821e+08	2.67346e+08	2.62858e+08	1.823	1.653	2.351	1.197	1.749	0.65	0.917	0.99	1.553	1.193	1.308	0.731	0.772	0.0629136
Q9NZD4	Alpha-hemoglobin-stabilizing protein OS=Homo sapiens OX=9606 GN=AHSP PE=1 SV=1	AHSP	42	4	12	4	11.8	848468	689549	9.00084e+06		446569	6.95741e+06	8.22848e+06	100721	1.63563e+06	269149	560641	2.02683e+06	0.287	0.461	4.939		0.275	1.944	3.817	0.059	0.858	0.108	0.324	0.666	3.024	0.641058
O14791	Apolipoprotein L1 OS=Homo sapiens OX=9606 GN=APOL1 PE=1 SV=5	APOL1	16	6	43	6	43.9	2.69122e+06	2.08124e+06	7.1605e+06	5.81793e+06	6.875e+06	1.37952e+07	8.73472e+06	3.08925e+06	1.36894e+07	5.55335e+06	9.46353e+06	1.23346e+07	0.335	0.511	1.445	1.196	1.558	1.417	1.49	0.661	2.639	0.818	2.012	1.491	1.766	0.201551
O95971	CD160 antigen OS=Homo sapiens OX=9606 GN=CD160 PE=1 SV=1	CD160	6	1	10	1	19.8	932923	1.76585e+06		1.48365e+06	545211	1.43945e+06		1.44099e+06	1.16875e+06	1.49304e+06		1.26778e+06
P15291	Beta-1,4-galactosyltransferase 1 OS=Homo sapiens OX=9606 GN=B4GALT1 PE=1 SV=5	B4GALT1	24	7	28	7	43.9	5.93259e+06	3.91813e+06	4.86773e+06	4.84098e+06	5.58565e+06	2.33221e+07	6.36565e+06	6.15828e+06	978242	7.16783e+06	915045	2.29067e+07	0.724	0.945	0.964	0.977	1.243	2.353	1.066	1.293	0.185	1.037	0.191	2.719	0.901	0.349159
Q9H336	Cysteine-rich secretory protein LCCL domain-containing 1 OS=Homo sapiens OX=9606 GN=CRISPLD1 PE=2 SV=1	CRISPLD1	3	1	1	1	56.9									347344
Q15848	Adiponectin OS=Homo sapiens OX=9606 GN=ADIPOQ PE=1 SV=1	ADIPOQ	12	2	5	2	26.4	4.58659e+06	2.25266e+06	7.12091e+06	6.95237e+06	2.10297e+07	1.30957e+07	1.14788e+07	82526.9	4.03686e+06	11890829	1.85893e+07	1.4608e+07	0.45	0.436	1.133	1.127	3.759	1.061	1.544	0.014	0.614	1.382	3.117	1.393	1.229	0.547175
P02730	Band 3 anion transport protein OS=Homo sapiens OX=9606 GN=SLC4A1 PE=1 SV=3	SLC4A1	4	2	4	2	101.7	1.2854e+06		1.45967e+06				290391	425073	1.21664e+06	268908			1.475		2.718				0.457	0.839	2.164	0.366			0.553	0.377685
Q13231	Chitotriosidase-1 OS=Homo sapiens OX=9606 GN=CHIT1 PE=1 SV=1	CHIT1	34	10	20	10	51.6	3.5255e+06					4.91514e+07	2.74504e+06		1.58669e+06	3.59097e+06	886242	3.87271e+07	0.233					2.683	0.249		0.163	0.281	0.1	2.487	0.998	0.957804
O76076	CCN family member 5 OS=Homo sapiens OX=9606 GN=CCN5 PE=1 SV=1	CCN5	22	3	20	3	26.8	2.45586e+06	248808	1.27988e+06	308441	2.19074e+06	3.45531e+07	4.25461e+06		639270	582447	2.84283e+06	2.19986e+07	0.358	0.072	0.303	0.074	0.582	4.163	0.851		0.145	0.101	0.709	3.118	1.238	0.811027
P46109	Crk-like protein OS=Homo sapiens OX=9606 GN=CRKL PE=1 SV=1	CRKL	6	2	2	2	33.8
Q9H3G5	Probable serine carboxypeptidase CPVL OS=Homo sapiens OX=9606 GN=CPVL PE=1 SV=2	CPVL	9	4	26	4	54.1	8.58254e+06	2.30538e+06	9.0745e+06	1.21783e+07	738379	8.39925e+06	7.41783e+06	7.46535e+06	1.06186e+07	4.61545e+06	1.30546e+06	4.8049e+06	1.257	0.667	2.156	2.948	0.197	1.016	1.49	1.881	2.411	0.801	0.327	0.684	1.288	0.951154
O95865	N(G),N(G)-dimethylarginine dimethylaminohydrolase 2 OS=Homo sapiens OX=9606 GN=DDAH2 PE=1 SV=1	DDAH2	18	5	27	4	29.6	329133	754552	2.68419e+06	6.31564e+06	1.15052e+06	9.34736e+06	5.9e+06	2.84368e+06	1.30424e+06	9.23915e+06	1.07718e+06	6.55571e+06	0.079	0.356	1.041	2.494	0.501	1.846	1.934	1.169	0.483	2.615	0.44	1.523	5.163	0.387762
P08246	Neutrophil elastase OS=Homo sapiens OX=9606 GN=ELANE PE=1 SV=1	ELANE	36	12	47	12	28.5			1.18543e+07	3.32948e+06		8.03139e+06	2.71191e+06		2.85542e+07	9.2819e+07		2.85286e+07			0.724	0.207		0.25	0.14		1.667	4.14		1.044	8.826	0.112814
Q02790	Peptidyl-prolyl cis-trans isomerase FKBP4 OS=Homo sapiens OX=9606 GN=FKBP4 PE=1 SV=3	FKBP4	9	3	4	3	51.8
P17174	Aspartate aminotransferase, cytoplasmic OS=Homo sapiens OX=9606 GN=GOT1 PE=1 SV=3	GOT1	13	5	12	5	46.2	4.07048e+06	787046	2.90746e+06	2.58367e+06	581810	2.74625e+06		743562	4.06016e+06	2.70431e+06		2.2797e+06	1.641	0.627	1.902	1.721	0.427	0.915		0.516	2.537	1.291		0.893	0.971	0.695073
Q9ULZ3	Apoptosis-associated speck-like protein containing a CARD OS=Homo sapiens OX=9606 GN=PYCARD PE=1 SV=2	PYCARD	29	5	16	5	21.6	2.14756e+06	1.27903e+06	1.16493e+06	696700	551448	2.99613e+07	2.13088e+06	1.56121e+06	827278	860764	1.66152e+06	2.13746e+07	0.38	0.446	0.334	0.204	0.178	4.376	0.517	0.475	0.227	0.18	0.502	3.672	1.274	0.586389
P49913	Cathelicidin antimicrobial peptide OS=Homo sapiens OX=9606 GN=CAMP PE=1 SV=1	CAMP	15	3	6	3	19.3	1.89753e+06	712114	1.36911e+06		1.8375e+06	3.02263e+06	1.18015e+06	650639	3.66913e+06	4.76677e+06	2.17759e+06	9.91237e+06	0.633	0.469	0.741		1.117	0.833	0.54	0.373	1.897	1.883	1.242	3.213	1.835	0.271738
P07384	Calpain-1 catalytic subunit OS=Homo sapiens OX=9606 GN=CAPN1 PE=1 SV=1	CAPN1	11	8	16	8	81.8	6.29927e+06	117226	3.36309e+06	346184	1.52707e+06	243055	83826.6	195264	3.1744e+06	1.40129e+07	51085.4	1.66182e+06	2.301	0.085	1.993	0.209	1.017	0.073	0.042	0.123	1.797	6.063	0.032	0.59	6.582	0.819029
Q99674	Cell growth regulator with EF hand domain protein 1 OS=Homo sapiens OX=9606 GN=CGREF1 PE=2 SV=3	CGREF1	17	3	5	3	33.4	2.07977e+06					3.35874e+06	1.11871e+06	613235		704823		2.1365e+06	1.179					1.573	0.87	0.598		0.473		1.177	0.743	0.0149098
Q5T0Z8	Uncharacterized protein C6orf132 OS=Homo sapiens OX=9606 GN=C6orf132 PE=1 SV=4	C6orf132	1	1	1	1	124
Q07507	Dermatopontin OS=Homo sapiens OX=9606 GN=DPT PE=1 SV=2	DPT	40	8	54	8	24	2.21495e+07	3.10604e+06	2.32832e+07		1.36934e+07	2.39848e+08	3.30723e+07	1.71213e+07	1.85648e+06	2.7438e+06	2.2757e+07	2.09951e+08	0.391	0.108	0.667		0.44	3.497	0.801	0.52	0.051	0.057	0.687	3.601	1.906	0.958693
P05413	Fatty acid-binding protein, heart OS=Homo sapiens OX=9606 GN=FABP3 PE=1 SV=4	FABP3	77	13	163	12	14.8	7.16021e+07	4.16417e+07	6.94327e+07	2.59635e+07	3.74502e+07	1.84808e+08	5.61252e+07	4.1997e+07	6.95343e+07	4.26171e+07	4.81844e+07	1.54909e+08	0.963	1.106	1.515	0.577	0.918	2.053	1.035	0.971	1.449	0.679	1.108	2.024	1.046	0.476336
Q14315	Filamin-C OS=Homo sapiens OX=9606 GN=FLNC PE=1 SV=3	FLNC	11	22	83	16	290.8	1.90332e+07	2.46403e+07	2.28862e+07	1.04873e+07	2.29287e+07	1.15503e+08	3.77379e+07	2.60633e+07	1.78567e+07	1.16308e+07	2.28373e+07	1.141e+08	0.485	1.239	0.946	0.441	1.064	2.43	1.318	1.142	0.705	0.351	0.994	2.824	1.213	0.698855
P35637	RNA-binding protein FUS OS=Homo sapiens OX=9606 GN=FUS PE=1 SV=1	FUS	8	2	2	2	53.4	1.86082e+06												0.946
P01008	Antithrombin-III OS=Homo sapiens OX=9606 GN=SERPINC1 PE=1 SV=1	SERPINC1	53	44	1810	44	52.6	2.45128e+09	3.51882e+09	3.82802e+09	3.26642e+09	5.41524e+09	4.20461e+09	3.94121e+09	3.34083e+09	2.49752e+09	4.13836e+09	5.6528e+09	4.47087e+09	0.595	1.688	1.509	1.311	2.398	0.844	1.313	1.396	0.941	1.191	2.348	1.056	1.133	0.832373
O43505	Beta-1,4-glucuronyltransferase 1 OS=Homo sapiens OX=9606 GN=B4GAT1 PE=1 SV=1	B4GAT1	4	2	16	2	47.1	1.20111e+07	2.47389e+07	2.05481e+07	2.02216e+07	1.11187e+07	8.35512e+06	1.03129e+07	2.47402e+07	2.46555e+07	2.05756e+07	1.26635e+07	6.64144e+06	0.694	2.821	1.925	1.93	1.17	0.399	0.817	2.457	2.207	1.407	1.25	0.373	0.988	0.743923
P55287	Cadherin-11 OS=Homo sapiens OX=9606 GN=CDH11 PE=2 SV=2	CDH11	15	10	65	10	87.9	3.33066e+06	5.84882e+06	4.90616e+06	2.03154e+07	3.81774e+06	2.90747e+07	1.59128e+07	3.45776e+06	2.44399e+06	1.79944e+07	3.31812e+06	2.4231e+07	0.281	0.974	0.671	2.83	0.587	2.025	1.84	0.501	0.319	1.797	0.478	1.985	1.661	0.933845
P02747	Complement C1q subcomponent subunit C OS=Homo sapiens OX=9606 GN=C1QC PE=1 SV=3	C1QC	16	3	6	3	25.8			538442		654755	1.32235e+06			7.29821e+06		821100	6.49688e+06			0.289		0.395	0.362			3.748		0.465	2.092	6.642	0.168267
O95833	Chloride intracellular channel protein 3 OS=Homo sapiens OX=9606 GN=CLIC3 PE=1 SV=2	CLIC3	13	3	3	3	26.6						355401				4.80947e+06		238383						0.154				2.992		0.122	0.792
P24387	Corticotropin-releasing factor-binding protein OS=Homo sapiens OX=9606 GN=CRHBP PE=1 SV=2	CRHBP	32	8	70	8	36.1	5.47332e+06	2.84479e+06	4.96946e+06	2.70291e+06	5.11024e+06	1.3006e+08	1.07596e+07	5.94204e+06	6.52626e+06	6.19319e+06	5.02799e+06	1.03837e+08	0.215	0.22	0.316	0.175	0.365	4.214	0.579	0.401	0.397	0.288	0.337	3.958	1.547	0.0857597
P02741	C-reactive protein OS=Homo sapiens OX=9606 GN=CRP PE=1 SV=1	CRP	19	5	24	5	25	1.37583e+08	3.33255e+06	2.44857e+07	8.15817e+06	4.83389e+07	2.36376e+07	9.12851e+06	5.62591e+06	2.19644e+07	1.0917e+07	1.04833e+07	1.55204e+07	4.893	0.234	1.413	0.479	3.133	0.695	0.445	0.344	1.211	0.46	0.637	0.536	0.725	0.183841
P08574	Cytochrome c1, heme protein, mitochondrial OS=Homo sapiens OX=9606 GN=CYC1 PE=1 SV=3	CYC1	4	1	1	1	35.4
Q01524	Defensin-6 OS=Homo sapiens OX=9606 GN=DEFA6 PE=1 SV=1	DEFA6	10	1	2	1	11	3.78033e+07	6.67987e+07	4.84027e+07	4.26055e+07	4.00215e+07	2.43742e+07	4.02166e+07	3.49818e+07	3.9323e+07	63094272	5.16214e+07	3.34349e+07
P24855	Deoxyribonuclease-1 OS=Homo sapiens OX=9606 GN=DNASE1 PE=1 SV=1	DNASE1	16	3	18	3	31.4	4.54627e+06	2.15009e+06	3.84111e+06	1.19828e+07		3.83868e+06		2.71764e+06	4.04894e+06	1.05417e+07			0.788	0.736	1.08	3.432		0.55		0.81	1.088	2.164			0.913	0.561246
Q9BXR6	Complement factor H-related protein 5 OS=Homo sapiens OX=9606 GN=CFHR5 PE=1 SV=1	CFHR5	12	6	26	5	64.4	819279		468931	1.42811e+06	1.35576e+07	2.00086e+06	1.48234e+06	455475		2.16095e+06	9.02653e+06	3.51483e+06	0.222		0.206	0.639	6.694	0.448	0.551	0.212		0.693	4.181	0.926	1.565	0.396292
P04217	Alpha-1B-glycoprotein OS=Homo sapiens OX=9606 GN=A1BG PE=1 SV=4	A1BG	57	38	652	38	54.2	3.65185e+09	2.99917e+09	3.44481e+09	3.35635e+09	3.22655e+09	1.70398e+09	3.15701e+09	2.92451e+09	2.48747e+09	2.61045e+09	2.39161e+09	1.55375e+09	1.237	2.006	1.893	1.879	1.992	0.477	1.467	1.704	1.306	1.048	1.385	0.512	0.842	0.139186
Q9NP55	BPI fold-containing family A member 1 OS=Homo sapiens OX=9606 GN=BPIFA1 PE=1 SV=1	BPIFA1	4	1	1	1	26.7	3.09056e+06
P04003	C4b-binding protein alpha chain OS=Homo sapiens OX=9606 GN=C4BPA PE=1 SV=2	C4BPA	44	19	128	19	67	9.12037e+06	4.62124e+06	2.53324e+07	5.10225e+06	3.92234e+07	9.26604e+07	1.60451e+07	4.98179e+06	1.65638e+08	1.39639e+07	3.32048e+07	7.5214e+07	0.213	0.214	0.962	0.197	1.673	1.791	0.515	0.201	6.008	0.387	1.328	1.711	2.219	0.174529
P26196	Probable ATP-dependent RNA helicase DDX6 OS=Homo sapiens OX=9606 GN=DDX6 PE=1 SV=2	DDX6	10	3	3	3	54.4	1.53256e+06										188779		1.684										0.355
O75937	DnaJ homolog subfamily C member 8 OS=Homo sapiens OX=9606 GN=DNAJC8 PE=1 SV=2	DNAJC8	6	1	1	1	29.8	1.03383e+06				151434						364275
P63104	14-3-3 protein zeta/delta OS=Homo sapiens OX=9606 GN=YWHAZ PE=1 SV=1	YWHAZ	51	12	55	7	27.7	7.1751e+07	1.00234e+07	1.75719e+07	1.12869e+07	4.70009e+06	5.64253e+07	1.21261e+07	3.02758e+06	1.10635e+07	8.99425e+07	6.92677e+06	3.03892e+07	2.504	0.691	0.995	0.651	0.299	1.627	0.581	0.182	0.599	3.718	0.413	1.031	1.471	0.585521
P04075	Fructose-bisphosphate aldolase A OS=Homo sapiens OX=9606 GN=ALDOA PE=1 SV=2	ALDOA	45	15	51	12	39.4	4.7256e+07	4.28463e+06	1.25782e+07	1.00677e+07	3.34982e+06	9.58873e+06	5.60603e+06	6.92642e+06	1.40554e+07	4.24949e+07	2.73956e+06	6.95802e+06	3.233	0.579	1.396	1.138	0.418	0.542	0.526	0.815	1.491	3.444	0.32	0.463	1.214	0.77121
Q9UKA4	A-kinase anchor protein 11 OS=Homo sapiens OX=9606 GN=AKAP11 PE=1 SV=1	AKAP11	0	1	4	1	210.4	108401	1.08561e+06	9.37989e+06		186597			1.50202e+06	1.10527e+07			176753
O95994	Anterior gradient protein 2 homolog OS=Homo sapiens OX=9606 GN=AGR2 PE=1 SV=1	AGR2	10	2	4	1	20	282468		290786		51632.8	527772			188096	561244		636213
P19961	Alpha-amylase 2B OS=Homo sapiens OX=9606 GN=AMY2B PE=1 SV=1	AMY2B	35	14	76	1	57.7
O75882	Attractin OS=Homo sapiens OX=9606 GN=ATRN PE=1 SV=2	ATRN	9	11	80	11	158.4	2.20043e+07	2.1886e+07	2.0872e+07	2.95902e+07	1.26145e+07	9.3504e+06	1.42737e+07	2.28768e+07	2.33414e+07	2.3127e+07	9.26105e+06	5.97758e+06	1.161	2.28	1.787	2.58	1.213	0.408	1.033	2.076	1.909	1.445	0.835	0.306	0.811	0.057533
P12111	Collagen alpha-3(VI) chain OS=Homo sapiens OX=9606 GN=COL6A3 PE=1 SV=5	COL6A3	21	59	339	42	343.5	2.99022e+08	1.66512e+08	2.27667e+08	2.60803e+08	1.49306e+08	4.15066e+08	2.88811e+08	2.28276e+08	1.78773e+08	2.29516e+08	1.49761e+08	3.98043e+08	1.135	1.248	1.402	1.635	1.032	1.301	1.503	1.49	1.052	1.032	0.972	1.468	0.995	0.758996
P10643	Complement component C7 OS=Homo sapiens OX=9606 GN=C7 PE=1 SV=2	C7	52	34	474	34	93.5	1.6322e+08	1.36054e+08	3.08021e+08	1.7413e+08	5.09867e+08	2.34399e+08	3.07063e+08	2.05719e+08	2.56519e+08	2.4481e+08	5.96486e+08	3.30608e+08	0.534	0.88	1.636	0.942	3.042	0.634	1.379	1.159	1.302	0.949	3.339	1.052	1.41	0.176527
Q9UHI8	A disintegrin and metalloproteinase with thrombospondin motifs 1 OS=Homo sapiens OX=9606 GN=ADAMTS1 PE=1 SV=4	ADAMTS1	5	2	5	2	105.3			326442			1.23119e+06	609674					1.13332e+06			0.607			1.166	0.959					1.263	1.083
P07358	Complement component C8 beta chain OS=Homo sapiens OX=9606 GN=C8B PE=1 SV=3	C8B	32	17	239	17	67	5.63563e+08	5.52136e+08	5.88127e+08	6.99662e+08	4.60341e+08	3.30966e+08	5.64341e+08	8.65868e+08	7.57737e+08	7.92737e+08	6.59424e+08	4.4759e+08	0.878	1.699	1.487	1.802	1.308	0.426	1.207	2.321	1.831	1.464	1.757	0.678	1.287	0.0571261
P06576	ATP synthase subunit beta, mitochondrial OS=Homo sapiens OX=9606 GN=ATP5F1B PE=1 SV=3	ATP5F1B	23	9	42	9	56.5	3.38022e+07	8.8616e+06	1.04186e+07	1.05981e+07	7.75269e+06	1.35091e+07	2.15567e+07	1.3908e+07	1.39018e+07	2.3921e+07	6.56168e+06	9.67559e+06	2.199	1.138	1.1	1.14	0.919	0.726	1.924	1.556	1.402	1.844	0.73	0.612	1.129	0.523394
P26992	Ciliary neurotrophic factor receptor subunit alpha OS=Homo sapiens OX=9606 GN=CNTFR PE=1 SV=2	CNTFR	19	5	17	5	40.6	3.94525e+06	1.09281e+06	4.35045e+06	2.01001e+07	3.22587e+07		5.64628e+06	790143	2.8423e+06	1.95083e+06	8.89362e+06	546373	0.498	0.272	0.891	4.194	7.422		0.978	0.172	0.556	0.292	1.92	0.067	0.71	0.19874
Q9H2M3	S-methylmethionine--homocysteine S-methyltransferase BHMT2 OS=Homo sapiens OX=9606 GN=BHMT2 PE=1 SV=1	BHMT2	10	3	6	1	40.3
O00244	Copper transport protein ATOX1 OS=Homo sapiens OX=9606 GN=ATOX1 PE=1 SV=1	ATOX1	63	4	7	4	7.4				635622		8.63887e+06	1.39399e+06	814543		2288121		3.9523e+06				0.336		2.286	0.612	0.449		0.868		1.23	1.561	0.868291
Q99728	BRCA1-associated RING domain protein 1 OS=Homo sapiens OX=9606 GN=BARD1 PE=1 SV=2	BARD1	1	1	3	1	86.6		1.68469e+06	2.14629e+06	1.76032e+06	2.30725e+06	7.84088e+06		1.77708e+06	1.76914e+06		3.00057e+06	5.89876e+06
Q6YHK3	CD109 antigen OS=Homo sapiens OX=9606 GN=CD109 PE=1 SV=2	CD109	3	3	7	3	161.6		1.05075e+06	303889	376207	889523	1.06496e+06	822196	816970	509603	824686	957116	943611		2.522	0.599	0.756	1.971	1.07	1.371	1.708	0.96	1.188	1.989	1.115	1.181	0.505764
P22792	Carboxypeptidase N subunit 2 OS=Homo sapiens OX=9606 GN=CPN2 PE=1 SV=3	CPN2	17	8	107	8	60.5	4.71955e+07	2.28879e+07	2.7126e+07	2.30932e+07	1.31006e+07	8.86929e+06	3.18474e+07	2.17966e+07	2.55508e+07	1.74756e+07	1.17481e+07	8.02965e+06	2.071	1.983	1.931	1.674	1.048	0.322	1.917	1.645	1.738	0.908	0.881	0.342	0.85	0.107518
Q08554	Desmocollin-1 OS=Homo sapiens OX=9606 GN=DSC1 PE=1 SV=2	DSC1	6	4	43	4	99.9	2.73901e+07	2.17657e+07	3.32241e+07	5.22781e+06	1.56149e+07	2.2901e+08	4.17569e+07	2.27499e+07	3.09905e+07	1.23093e+07	2.2276e+07	3.26972e+08	0.394	0.618	0.775	0.124	0.409	2.721	0.824	0.563	0.691	0.21	0.548	4.57	1.434	0.0820337
P32926	Desmoglein-3 OS=Homo sapiens OX=9606 GN=DSG3 PE=1 SV=2	DSG3	9	6	6	6	107.5	1.02286e+06	417480			811048	1.05417e+06	642563		698540	9.31934e+06	733809	390222	0.577	0.465			0.834	0.491	0.497		0.611	6.228	0.708	0.214	0.715	0.231893
Q9Y6C2	EMILIN-1 OS=Homo sapiens OX=9606 GN=EMILIN1 PE=1 SV=3	EMILIN1	1	1	1	1	106.6						638004						322325
Q15717	ELAV-like protein 1 OS=Homo sapiens OX=9606 GN=ELAVL1 PE=1 SV=2	ELAVL1	10	3	3	3	36.1	1.2403e+06												0.946
P00505	Aspartate aminotransferase, mitochondrial OS=Homo sapiens OX=9606 GN=GOT2 PE=1 SV=3	GOT2	15	6	6	6	47.5	2.79958e+06			88418.1									1.834			0.096
P14550	Aldo-keto reductase family 1 member A1 OS=Homo sapiens OX=9606 GN=AKR1A1 PE=1 SV=3	AKR1A1	10	4	8	3	36.6	2.61947e+06	511943	368808	434552		2.26849e+06	198556	370906	136980	320885		477636	3.214	1.241	0.734	0.881		2.3	0.334	0.783	0.261	0.466		0.57	0.373	0.0224648
O43707	Alpha-actinin-4 OS=Homo sapiens OX=9606 GN=ACTN4 PE=1 SV=2	ACTN4	30	21	35	13	104.8	1.33706e+07	6.47497e+06	4.71097e+06	9.97618e+06	9.29489e+06	9.79482e+06	6.11636e+06	6.13637e+06	6.14546e+06	4.95235e+07	4.96248e+06	8.64146e+06	1.123	1.074	0.642	1.385	1.423	0.68	0.705	0.886	0.8	4.927	0.713	0.705	1.299	0.92115
P54802	Alpha-N-acetylglucosaminidase OS=Homo sapiens OX=9606 GN=NAGLU PE=1 SV=2	NAGLU	22	12	43	12	82.2	8.68172e+06	4.25182e+06	8.09662e+06	4.18674e+07	1.71392e+06	4.18229e+06	3.52476e+06	1.08128e+07	1.07305e+07	1.21056e+07	2.62473e+06	1.16829e+06	0.898	0.868	1.359	7.155	0.323	0.357	0.5	1.923	1.72	1.483	0.464	0.117	1.002	0.444879
Q10588	ADP-ribosyl cyclase/cyclic ADP-ribose hydrolase 2 OS=Homo sapiens OX=9606 GN=BST1 PE=1 SV=2	BST1	8	2	2	2	35.7				262715												1.563
P16152	Carbonyl reductase [NADPH] 1 OS=Homo sapiens OX=9606 GN=CBR1 PE=1 SV=3	CBR1	24	6	19	6	30.4	810763	544493	620305	598034	1.56264e+06	5.76523e+06	1.00144e+06	553209	492210	2.319e+06	1.60713e+06	7.54361e+06	0.393	0.521	0.488	0.479	1.38	2.309	0.666	0.461	0.37	1.331	1.332	3.554	1.437	0.254513
Q14574	Desmocollin-3 OS=Homo sapiens OX=9606 GN=DSC3 PE=1 SV=3	DSC3	4	3	5	2	99.9					1.90705e+06	8.78652e+06		770888			1.99843e+06	1.63738e+07					0.551	1.151		0.21			0.542	2.523	1.588	0.513357
O95336	6-phosphogluconolactonase OS=Homo sapiens OX=9606 GN=PGLS PE=1 SV=2	PGLS	52	9	86	9	27.5	1.23432e+07	1.01774e+07	1.25904e+07	2.76255e+07	6.79369e+06	4.24912e+07	1.34996e+07	1.50669e+07	1.56172e+07	23082025	6.81661e+06	2.56541e+07	0.662	1.077	1.095	2.447	0.664	1.882	0.993	1.389	1.298	1.466	0.625	1.337	1.038	0.926647
P49189	4-trimethylaminobutyraldehyde dehydrogenase OS=Homo sapiens OX=9606 GN=ALDH9A1 PE=1 SV=3	ALDH9A1	4	2	6	1	53.8	393440		74113.3	464171					656224	406147
P12814	Alpha-actinin-1 OS=Homo sapiens OX=9606 GN=ACTN1 PE=1 SV=2	ACTN1	14	10	17	2	103
P53004	Biliverdin reductase A OS=Homo sapiens OX=9606 GN=BLVRA PE=1 SV=2	BLVRA	9	2	5	2	33.4	8.19436e+08	867731	1.21975e+06	191166	827714	714504	8.2423e+08	1.07013e+06	373309	668354	854893	920027	5.632	0.012	0.014	0.002	0.01	0.004	7.771	0.013	0.004	0.005	0.01	0.006	1.291	0.80211
Q8TDL5	BPI fold-containing family B member 1 OS=Homo sapiens OX=9606 GN=BPIFB1 PE=1 SV=1	BPIFB1	15	5	5	5	52.4	464685			79417	52235.8					9.15369e+06			0.18			0.051	0.037					4.208			82.51
Q9NY97	N-acetyllactosaminide beta-1,3-N-acetylglucosaminyltransferase 2 OS=Homo sapiens OX=9606 GN=B3GNT2 PE=1 SV=2	B3GNT2	5	1	1	1	46
P08185	Corticosteroid-binding globulin OS=Homo sapiens OX=9606 GN=SERPINA6 PE=1 SV=1	SERPINA6	25	13	268	8	45.1	6.01413e+08	5.64253e+08	5.33932e+08	6.661e+08	4.42813e+08	2.30125e+08	5.78572e+08	5.88482e+08	5.044e+08	3.92329e+08	4.08096e+08	2.76779e+08	1.18	2.185	1.699	2.159	1.583	0.373	1.557	1.985	1.534	0.912	1.368	0.528	0.972	0.604968
Q0VF96	Cingulin-like protein 1 OS=Homo sapiens OX=9606 GN=CGNL1 PE=1 SV=2	CGNL1	1	1	4	1	149	9.43517e+06		420604	854082		1.80112e+06				4.42033e+06	85141.6	1.763e+06
Q9H0W9	Ester hydrolase C11orf54 OS=Homo sapiens OX=9606 GN=C11orf54 PE=1 SV=1	C11orf54	6	2	9	2	35.1	915661	119383	798660	1.20488e+06		846511		348433	946338	881317		359089	1.214	0.313	1.718	2.64		0.927		0.795	1.945	1.384		0.463	1.174	0.864966
P00367	Glutamate dehydrogenase 1, mitochondrial OS=Homo sapiens OX=9606 GN=GLUD1 PE=1 SV=2	GLUD1	2	1	1	1	61.4
P09172	Dopamine beta-hydroxylase OS=Homo sapiens OX=9606 GN=DBH PE=1 SV=3	DBH	2	1	4	1	69
Q9C005	Protein dpy-30 homolog OS=Homo sapiens OX=9606 GN=DPY30 PE=1 SV=1	DPY30	9	1	1	1	11.2	1.01689e+06
P06733	Alpha-enolase OS=Homo sapiens OX=9606 GN=ENO1 PE=1 SV=2	ENO1	44	19	101	16	47.1	4.71234e+08	4.55459e+08	4.65475e+08	2.65442e+08	2.97442e+08	4.46502e+08	4.19061e+08	4.85433e+08	4.9678e+08	3.98971e+08	2.64051e+08	4.83414e+08	1.081	2.063	1.732	1.006	1.243	0.846	1.318	1.915	1.766	1.084	1.035	1.078	1.059	0.514617
P03951	Coagulation factor XI OS=Homo sapiens OX=9606 GN=F11 PE=1 SV=1	F11	16	8	20	8	70.1	8.62851e+06	4.90528e+06	9.40628e+06	7.56195e+06	2.14484e+07	3.33045e+07	1.41872e+07	9.17599e+06	9.52489e+06	1.72408e+07	2.02294e+07	3.86129e+07	0.504	0.566	0.892	0.73	2.284	1.608	1.137	0.922	0.863	1.194	2.021	2.193	1.456	0.073733
Q562R1	Beta-actin-like protein 2 OS=Homo sapiens OX=9606 GN=ACTBL2 PE=1 SV=2	ACTBL2	18	8	62	1	42
Q13185	Chromobox protein homolog 3 OS=Homo sapiens OX=9606 GN=CBX3 PE=1 SV=4	CBX3	15	2	2	1	20.8	780543										142302
Q01518	Adenylyl cyclase-associated protein 1 OS=Homo sapiens OX=9606 GN=CAP1 PE=1 SV=5	CAP1	8	3	9	3	51.9	9.18459e+06	5.57925e+06	7.96883e+06	3.80128e+06	3.28514e+06	3.14174e+06	3.33354e+06	4.86872e+06	1.0548e+07	4.54415e+06	2.90447e+06		1.615	1.938	2.274	1.105	1.053	0.457	0.804	1.473	2.876	0.947	0.873		0.842	0.220811
P00746	Complement factor D OS=Homo sapiens OX=9606 GN=CFD PE=1 SV=5	CFD	58	14	497	12	27	3.05876e+08	2.56857e+08	9.62314e+08	1.95751e+08	7.30297e+08	1.19315e+10	1.7272e+09	3.87048e+08	6.80951e+08	5.78383e+08	1.01046e+09	1.31528e+10	0.109	0.18	0.555	0.115	0.473	3.506	0.842	0.237	0.375	0.244	0.614	4.546	2.406	0.174125
Q03188	Centromere protein C OS=Homo sapiens OX=9606 GN=CENPC PE=1 SV=2	CENPC	1	1	4	1	106.8	1.3034e+06				1.66275e+06	3.87957e+06	1.37019e+06				2.50443e+06	2.41258e+06
Q99459	Cell division cycle 5-like protein OS=Homo sapiens OX=9606 GN=CDC5L PE=1 SV=2	CDC5L	1	1	58	1	92.2	3.18856e+08	1.56001e+08	1.77983e+08	1.68297e+08	1.93983e+08	7.00757e+08	3.82515e+08	1.67861e+08	1.76641e+08	2.39306e+08	1.72855e+08	3.50634e+08
P49747	Cartilage oligomeric matrix protein OS=Homo sapiens OX=9606 GN=COMP PE=1 SV=2	COMP	26	14	68	12	82.8	2.31508e+06	668679	3.65676e+06	3.41313e+06	3.77523e+06	1.77678e+07	1.175e+07	245346	1.7732e+06	9.16088e+06	1.27434e+07	1.55617e+07	0.317	0.181	0.813	0.773	0.943	2.012	2.209	0.058	0.377	1.487	2.986	2.073	2.312	0.542099
P31146	Coronin-1A OS=Homo sapiens OX=9606 GN=CORO1A PE=1 SV=4	CORO1A	11	5	11	5	51	1.51545e+07		153233	209027	314497	2.24911e+06	218012		560266	456870		2.53455e+06	5.904		0.097	0.135	0.223	0.724	0.117		0.338	0.211		0.96	1.598	0.704435
P60022	Beta-defensin 1 OS=Homo sapiens OX=9606 GN=DEFB1 PE=1 SV=1	DEFB1	44	2	16	2	7.4	3.6387e+07	1.72188e+07	1.03151e+07	2.96436e+07	8.51238e+06	3.02539e+07	5.89383e+06	1.24191e+07	2.61439e+07	1.48756e+07	1.37934e+07	7.9051e+06	1.936	1.809	0.89	2.606	0.825	1.33	0.43	1.136	2.156	0.937	1.255	0.409	0.91	0.272274
P17213	Bactericidal permeability-increasing protein OS=Homo sapiens OX=9606 GN=BPI PE=1 SV=4	BPI	3	2	2	2	53.9	1.50565e+06	2.96484e+06	1.22977e+06	1.35612e+06	1.87446e+06	5.20108e+06	1.37351e+06	1.49338e+06	1.099e+06	2.4616e+06	4.34272e+06	2.17743e+06	0.631	2.454	0.836	0.939	1.432	1.801	0.79	1.077	0.714	1.222	3.112	0.887	1.085	0.789378
P20851	C4b-binding protein beta chain OS=Homo sapiens OX=9606 GN=C4BPB PE=1 SV=1	C4BPB	27	6	7	6	28.3	3.44187e+06	426078	1.17224e+06	439235	681417	2.89661e+06	2.76219e+06	167722	9.39037e+06	868111	1.49297e+06	1.3717e+06	1.556	0.38	0.86	0.328	0.561	1.082	1.713	0.13	6.58	0.465	1.154	0.603	2.188	0.586501
P55291	Cadherin-15 OS=Homo sapiens OX=9606 GN=CDH15 PE=1 SV=1	CDH15	2	1	1	1	88.9
Q7LBR1	Charged multivesicular body protein 1b OS=Homo sapiens OX=9606 GN=CHMP1B PE=1 SV=1	CHMP1B	9	2	7	2	22.1	1.41708e+06	1.44527e+06	1.69076e+06	2.34179e+06	883484		2.04503e+06	2.68168e+06	2.60378e+06	2507366	1.17173e+06	1.40512e+06	0.73	1.471	1.414	1.994	0.83		1.445	2.377	2.08	1.53	1.032	0.704	1.415	0.13378
Q9NR30	Nucleolar RNA helicase 2 OS=Homo sapiens OX=9606 GN=DDX21 PE=1 SV=5	DDX21	1	1	1	1	87.3	1.50833e+06						1.95121e+06
Q16610	Extracellular matrix protein 1 OS=Homo sapiens OX=9606 GN=ECM1 PE=1 SV=2	ECM1	24	11	26	11	60.6	685419		1.67164e+06	1.49636e+06	2.14594e+06	5.52524e+06	1.3222e+06	545333	1.0817e+06	2.32647e+07	3.01948e+06	6.30344e+06	0.152		0.6	0.547	0.865	1.009	0.401	0.207	0.371	6.093	1.141	1.355	3.411	0.226784
P49184	Deoxyribonuclease-1-like 1 OS=Homo sapiens OX=9606 GN=DNASE1L1 PE=1 SV=1	DNASE1L1	6	1	1	1	33.9	333747	105353			175827							1.05305e+06
P01009	Alpha-1-antitrypsin OS=Homo sapiens OX=9606 GN=SERPINA1 PE=1 SV=3	SERPINA1	73	93	9570	93	46.7	3.74738e+10	2.90519e+10	3.65798e+10	3.62301e+10	3.5596e+10	2.15792e+10	4.02761e+10	3.31213e+10	3.08572e+10	2.75606e+10	2.87852e+10	2.16539e+10	1.123	1.719	1.779	1.794	1.944	0.534	1.656	1.707	1.434	0.978	1.475	0.631	0.96	0.551443
A8K2U0	Alpha-2-macroglobulin-like protein 1 OS=Homo sapiens OX=9606 GN=A2ML1 PE=1 SV=3	A2ML1	32	41	79	40	161	1.61371e+07	1.02595e+07	4.7682e+06	2.29954e+07	1.19679e+07	1.50192e+07	1.68319e+07	3.93278e+06	1.88674e+06	3.64198e+08	4.13575e+06	1.12326e+07	0.379	0.476	0.182	0.892	0.512	0.291	0.542	0.159	0.069	10.131	0.166	0.256	2.451	0.880138
P62258	14-3-3 protein epsilon OS=Homo sapiens OX=9606 GN=YWHAE PE=1 SV=1	YWHAE	26	7	39	4	29.2	3.23735e+06		704724	624678	459152				1.00475e+06	1.53258e+06			2.429		0.858	0.775	0.628				1.169	1.362			1.56	0.180588
O60218	Aldo-keto reductase family 1 member B10 OS=Homo sapiens OX=9606 GN=AKR1B10 PE=1 SV=2	AKR1B10	32	6	6	4	36		383325	304263	427632	1.76595e+06	1.50685e+06		1.09678e+06		4.72995e+06	349598	726919		0.571	0.372	0.533	2.427	0.939		1.422		4.224	0.451	0.533	2.792	0.838132
P43652	Afamin OS=Homo sapiens OX=9606 GN=AFM PE=1 SV=1	AFM	54	30	890	30	69	2.37754e+09	3.42178e+09	2.57582e+09	2.94455e+09	2.44399e+09	2.28622e+09	1.89813e+09	3.04667e+09	2.12504e+09	1.71415e+09	2.32443e+09	1.60582e+09	0.938	2.666	1.649	1.92	1.758	0.745	1.027	2.068	1.3	0.801	1.568	0.616	0.799	0.10363
P02656	Apolipoprotein C-III OS=Homo sapiens OX=9606 GN=APOC3 PE=1 SV=1	APOC3	52	6	59	6	10.8	2.07804e+08	1.18111e+08	1.02027e+08	6.4084e+07	1.638e+08	1.5838e+09	9.88781e+07	1.14873e+08	1.6024e+08	7.4811e+07	1.73217e+08	5.63908e+08	0.689	0.773	0.549	0.351	0.989	4.336	0.449	0.655	0.823	0.294	0.981	1.816	0.874	0.28601
Q9BY76	Angiopoietin-related protein 4 OS=Homo sapiens OX=9606 GN=ANGPTL4 PE=1 SV=2	ANGPTL4	6	2	2	2	45.2						734242						1.93697e+06						0.43						1.333	3.1
P55774	C-C motif chemokine 18 OS=Homo sapiens OX=9606 GN=CCL18 PE=1 SV=1	CCL18	9	1	1	1	9.8												812594
P27797	Calreticulin OS=Homo sapiens OX=9606 GN=CALR PE=1 SV=1	CALR	54	19	181	19	48.1	4.6628e+07	1.1017e+07	3.79546e+07	8.28109e+07	1.73408e+07	2.97915e+08	5.99259e+07	1.36995e+07	1.79543e+07	6.06189e+07	2.91349e+07	1.56514e+08	0.636	0.297	0.841	1.868	0.431	3.36	1.122	0.322	0.38	0.98	0.68	2.077	1.003	0.592947
P52907	F-actin-capping protein subunit alpha-1 OS=Homo sapiens OX=9606 GN=CAPZA1 PE=1 SV=3	CAPZA1	6	1	2	1	32.9	2.22967e+06		404261	257107	232785	324702	212846		719195	1.29669e+06	332559	490007
P00918	Carbonic anhydrase 2 OS=Homo sapiens OX=9606 GN=CA2 PE=1 SV=2	CA2	33	7	23	7	29.2	2.87259e+06	1.10101e+06	1.05957e+07	4.4888e+06	2.06107e+06	2.7936e+06	2.49916e+06	2.25713e+06	8.86157e+06	2716404	297830	1.32068e+06	0.779	0.589	4.661	2.011	1.018	0.626	0.929	1.053	3.725	0.872	0.138	0.348	0.817	0.247868
P01732	T-cell surface glycoprotein CD8 alpha chain OS=Homo sapiens OX=9606 GN=CD8A PE=1 SV=1	CD8A	8	1	1	1	25.7						3.67018e+06					1.67851e+06
Q96KN2	Beta-Ala-His dipeptidase OS=Homo sapiens OX=9606 GN=CNDP1 PE=1 SV=4	CNDP1	29	13	70	13	56.7	5.33198e+06	1.24641e+07	1.62466e+07	4.35185e+07	1.14786e+07	4.76599e+06	1.03862e+07	1.58035e+07	1.08156e+07	25307880	1.26046e+07	5.83327e+06	0.347	1.6	1.714	4.677	1.36	0.256	0.926	1.768	1.09	1.949	1.401	0.369	1.216	0.928578
O60494	Cubilin OS=Homo sapiens OX=9606 GN=CUBN PE=1 SV=5	CUBN	8	22	108	22	398.5	4.19778e+07	1.85705e+07	2.09994e+07	3.89232e+07	1.4064e+07	2.30866e+07	1.4626e+07	1.95129e+07	3.18402e+07	1.87086e+07	1.73272e+07	2.10725e+07	1.697	1.483	1.378	2.601	1.036	0.771	0.811	1.357	1.996	0.896	1.198	0.828	0.903	0.384878
P81605	Dermcidin OS=Homo sapiens OX=9606 GN=DCD PE=1 SV=2	DCD	41	4	43	4	11.3	7.68624e+07	3.09904e+07	3.13664e+07	3.38503e+06	1.55151e+07	4.21794e+07	2.66343e+07	2.5167e+07	3.88292e+07	7.76668e+06	1.52749e+07	3.83978e+07	2.476	1.971	1.639	0.18	0.911	1.123	1.177	1.394	1.939	0.296	0.841	1.202	1.001	0.696262
P09972	Fructose-bisphosphate aldolase C OS=Homo sapiens OX=9606 GN=ALDOC PE=1 SV=2	ALDOC	22	5	8	2	39.4	3.91109e+06					1.34995e+06				2.98136e+06			1.346					0.384				1.216
Q6ULP2	Aftiphilin OS=Homo sapiens OX=9606 GN=AFTPH PE=1 SV=3	AFTPH	1	1	5	1	102.1	1.2074e+06	2.25357e+06	113412	666237	728736	7.32141e+06	1.09816e+06	243771	94333.6	1.63022e+06	563581	5.12675e+06
Q16853	Membrane primary amine oxidase OS=Homo sapiens OX=9606 GN=AOC3 PE=1 SV=3	AOC3	2	1	2	1	84.6				1.41011e+06						2.11535e+06
O95861	3'(2'),5'-bisphosphate nucleotidase 1 OS=Homo sapiens OX=9606 GN=BPNT1 PE=1 SV=1	BPNT1	8	2	8	2	33.4	1.00199e+06	349166	684032	867590	224875	1.92935e+06	409437	618073	624402	785027	332561	635615	1.344	0.925	1.489	1.923	0.55	2.138	0.753	1.426	1.298	1.247	0.763	0.829	0.9	0.3552
Q96CG8	Collagen triple helix repeat-containing protein 1 OS=Homo sapiens OX=9606 GN=CTHRC1 PE=1 SV=1	CTHRC1	7	2	5	2	26.2	3.14283e+06					4.21658e+06	326159					4.24079e+06	0.997					1.105	0.142					1.308	0.663	0.554954
P35858	Insulin-like growth factor-binding protein complex acid labile subunit OS=Homo sapiens OX=9606 GN=IGFALS PE=1 SV=1	IGFALS	30	15	135	15	66	3.30966e+07	1.70972e+07	6.82427e+07	6.17431e+07	4.57885e+07	5.18967e+07	9.32561e+07	3.58866e+07	2.95813e+07	8.40431e+07	7.16374e+07	6.76411e+07	0.569	0.581	1.905	1.755	1.435	0.738	2.2	1.062	0.789	1.712	2.107	1.131	1.681	0.350644
P02647	Apolipoprotein A-I OS=Homo sapiens OX=9606 GN=APOA1 PE=1 SV=1	APOA1	72	46	2002	46	30.8	2.63444e+09	2.94343e+09	4.67237e+09	5.41675e+09	7.83663e+09	1.57892e+10	6.92969e+09	3.11508e+09	5.43353e+09	7.48639e+09	1.22591e+10	1.75473e+10	0.325	0.717	0.935	1.104	1.761	1.608	1.172	0.661	1.039	1.093	2.584	2.103	1.567	0.172368
P07355	Annexin A2 OS=Homo sapiens OX=9606 GN=ANXA2 PE=1 SV=2	ANXA2	49	16	49	16	38.6	1.08425e+07	4.90948e+06	2.71624e+06	2.80708e+07	963611	8.14059e+06	2.39565e+06	3.32444e+06	6.66939e+06	1.29173e+08	882526	7.37085e+06	0.599	0.536	0.243	2.563	0.097	0.372	0.182	0.316	0.571	8.453	0.083	0.396	1.41	0.917532
Q6Q788	Apolipoprotein A-V OS=Homo sapiens OX=9606 GN=APOA5 PE=1 SV=1	APOA5	6	1	1	1	41.2				234737		318981						610938
P00966	Argininosuccinate synthase OS=Homo sapiens OX=9606 GN=ASS1 PE=1 SV=2	ASS1	7	2	7	2	46.5	45674.8		131971	209636	40078.4	80892.4	19631.2	27278.2	289792	28323.3	28617.3	39580.4	0.505		2.367	3.829	0.807	0.739	0.298	0.519	4.965	0.371	0.541	0.425	0.806	0.280011
P11021	Endoplasmic reticulum chaperone BiP OS=Homo sapiens OX=9606 GN=HSPA5 PE=1 SV=2	HSPA5	15	12	46	9	72.3	1.24843e+07	3.55231e+06	5.06169e+06	3.41795e+06	3.46628e+06	1.59567e+07	3.81404e+06	4.32787e+06	6.51296e+06	1.35375e+07	3.05061e+06	1.08734e+07	1.647	0.925	1.083	0.745	0.833	1.739	0.69	0.982	1.332	2.115	0.688	1.394	1.196	0.986313
P53634	Dipeptidyl peptidase 1 OS=Homo sapiens OX=9606 GN=CTSC PE=1 SV=2	CTSC	40	17	143	17	51.8	6.5576e+07	2.20175e+07	6.29225e+07	2.04243e+08	1.5554e+07	2.57482e+07	4.20927e+07	5.75896e+07	6.01267e+07	2.50509e+07	1.59478e+07	1.58901e+07	1.215	0.805	1.891	6.253	0.525	0.394	1.07	1.835	1.727	0.55	0.505	0.286	0.975	0.449905
P16870	Carboxypeptidase E OS=Homo sapiens OX=9606 GN=CPE PE=1 SV=1	CPE	26	10	55	10	53.1	1.61833e+08	1.31148e+08	1.59374e+08	1.81404e+08	9.66241e+07	7.56856e+07	1.94907e+08	1.66929e+08	1.53432e+08	2.7326e+08	1.11066e+08	9.22432e+07	1.022	1.635	1.633	1.893	1.112	0.395	1.688	1.813	1.502	2.044	1.199	0.566	1.212	0.107789
Q6UVK1	Chondroitin sulfate proteoglycan 4 OS=Homo sapiens OX=9606 GN=CSPG4 PE=1 SV=2	CSPG4	2	4	9	4	250.4		2.36375e+06	2.11265e+06	5.33548e+06		1.55361e+06	590591	4.24943e+06	1.90679e+06	5.14381e+06		735943		1.656	1.216	3.129		0.455	0.287	2.594	1.049	2.162		0.254	0.92	0.516961
Q99715	Collagen alpha-1(XII) chain OS=Homo sapiens OX=9606 GN=COL12A1 PE=1 SV=2	COL12A1	8	21	77	21	332.9	5.43508e+07	1.09365e+07	1.14304e+07	8.89349e+06	1.38923e+07	5.73207e+07	3.58895e+07	1.14328e+07	1.27212e+07	7.01148e+06	7.31357e+06	4.43409e+07	2.239	0.89	0.764	0.605	1.043	1.951	2.028	0.81	0.812	0.342	0.515	1.775	0.808	0.104066
O75629	Protein CREG1 OS=Homo sapiens OX=9606 GN=CREG1 PE=1 SV=1	CREG1	5	1	9	1	24.1	800918		2.02115e+06	1.28646e+06		2.06333e+06		1.13486e+06	1.77875e+06	1.48358e+06		1.74182e+06
Q9HB71	Calcyclin-binding protein OS=Homo sapiens OX=9606 GN=CACYBP PE=1 SV=2	CACYBP	8	2	3	2	26.2	1.89915e+06			61274.4	47951				107593	243590			3.807			0.203	0.175				0.334	0.578			2.847
Q02487	Desmocollin-2 OS=Homo sapiens OX=9606 GN=DSC2 PE=1 SV=1	DSC2	14	13	69	12	99.9	6.31096e+07	5.68633e+07	6.00477e+07	2.32807e+07	3.10917e+07	1.64656e+08	5.67505e+07	4.06592e+07	4.91587e+07	3.1908e+07	2.51459e+07	1.13025e+08	1.001	1.781	1.545	0.61	0.899	2.158	1.235	1.109	1.209	0.599	0.682	1.742	0.864	0.138797
P01023	Alpha-2-macroglobulin OS=Homo sapiens OX=9606 GN=A2M PE=1 SV=3	A2M	63	87	1064	79	163.2	9.0054e+08	5.91761e+08	6.84566e+08	4.23143e+08	2.96301e+08	1.50031e+08	1.06961e+09	5.26128e+08	2.0432e+09	4.86261e+08	3.26961e+08	1.5557e+08	1.335	1.733	1.647	1.037	0.801	0.184	2.176	1.342	4.697	0.854	0.829	0.224	1.389	0.320458
P14621	Acylphosphatase-2 OS=Homo sapiens OX=9606 GN=ACYP2 PE=1 SV=2	ACYP2	44	5	13	5	11.1	2.71284e+06	1.16712e+06	315836		4.64897e+06	9.60967e+06	1.49847e+06	858397	885323	2.04103e+06	4.76284e+06	8.00491e+06	0.773	0.657	0.146		2.415	2.263	0.586	0.421	0.391	0.689	2.321	2.218	1.204	0.87815
P61204	ADP-ribosylation factor 3 OS=Homo sapiens OX=9606 GN=ARF3 PE=1 SV=2	ARF3	19	3	5	3	20.6	2.72364e+06		349000	301856	256927	568013			396977	806428		436360	3.53		0.734	0.646	0.607	0.608			0.798	1.238		0.55	1.303	0.448433
Q07812	Apoptosis regulator BAX OS=Homo sapiens OX=9606 GN=BAX PE=1 SV=1	BAX	17	2	5	2	21.2	1.93798e+06					1.9289e+06						2.04802e+06	0.93					0.765						0.955	1.248
P40121	Macrophage-capping protein OS=Homo sapiens OX=9606 GN=CAPG PE=1 SV=2	CAPG	19	5	11	5	38.5	180198		1.27986e+06		494587	6.99928e+06	2.91209e+06		1.58826e+06	2.46012e+06	618898	1.25645e+07	0.053		0.608		0.264	1.692	1.169		0.72	0.853	0.31	3.573	6.632	0.231703
P00915	Carbonic anhydrase 1 OS=Homo sapiens OX=9606 GN=CA1 PE=1 SV=2	CA1	61	19	413	19	28.9	1.51095e+08	1.19464e+08	2.90576e+08	1.62647e+08	8.5365e+07	5.12095e+08	5.38328e+08	1.45257e+08	1.84451e+08	2.11336e+08	7.46131e+07	3.66617e+08	0.603	0.942	1.883	1.074	0.621	1.69	2.949	0.998	1.142	1	0.51	1.423	1.525	0.714705
Q9H6B4	CXADR-like membrane protein OS=Homo sapiens OX=9606 GN=CLMP PE=1 SV=1	CLMP	9	2	9	2	41.3	823825					9.03817e+06						6.21897e+06	0.145					1.318						1.067	0.81
Q9BWP8	Collectin-11 OS=Homo sapiens OX=9606 GN=COLEC11 PE=1 SV=1	COLEC11	4	1	1	1	28.6
P78310	Coxsackievirus and adenovirus receptor OS=Homo sapiens OX=9606 GN=CXADR PE=1 SV=1	CXADR	8	3	6	3	40	1.35843e+06	1.03485e+06	1.39525e+06	1.341e+06	893359	2.591e+06	124186	1.19854e+06	1.19746e+06	704708	855566	1.57183e+06	1.081	1.626	1.801	1.763	1.295	1.703	0.136	1.64	1.477	0.664	1.164	1.216	0.657	0.116942
Q9BS26	Endoplasmic reticulum resident protein 44 OS=Homo sapiens OX=9606 GN=ERP44 PE=1 SV=1	ERP44	9	4	7	4	46.9	647051	263728	478661	316957		1.38439e+06	442731	250571	378286	426831	498947	824789	1.139	0.916	1.367	0.922		2.013	1.069	0.758	1.032	0.89	1.501	1.411	0.837	0.039533
Q02985	Complement factor H-related protein 3 OS=Homo sapiens OX=9606 GN=CFHR3 PE=1 SV=2	CFHR3	34	9	66	7	37.3	8.41451e+07	1.82342e+07	1.66879e+07	1.23657e+07	3.70869e+07	3.01976e+08	3.84189e+07	2.58264e+07	9.8899e+06	2.20376e+07	2.48227e+07	2.69249e+08	1.11	0.475	0.357	0.269	0.891	3.29	0.695	0.586	0.202	0.344	0.56	3.451	0.897	0.325689
P62993	Growth factor receptor-bound protein 2 OS=Homo sapiens OX=9606 GN=GRB2 PE=1 SV=1	GRB2	21	5	18	5	25.2	1.05616e+07	1.3675e+07	1.41617e+07	1.69344e+07	4.24867e+06	2.04642e+07	4.4463e+07	4.71091e+07	5.48662e+06	3.393e+07	2.82522e+06	1.42852e+07	0.525	1.343	1.143	1.392	0.385	0.841	3.034	4.032	0.423	2	0.24	0.691	2.006	0.563765
P18510	Interleukin-1 receptor antagonist protein OS=Homo sapiens OX=9606 GN=IL1RN PE=1 SV=1	IL1RN	20	3	10	3	20	934969	826316	944786	6.14826e+06	811865	4.32261e+06	481553			2.80393e+07		2.43725e+06	0.177	0.309	0.29	1.925	0.28	0.676	0.125			6.291		0.449	1.546	0.81032
P09228	Cystatin-SA OS=Homo sapiens OX=9606 GN=CST2 PE=1 SV=1	CST2	28	3	20	3	16.4	8.20288e+06			291931	373399	1.60625e+07	9.02176e+06		3.82361e+06	411888	5.39726e+06	1.08955e+07	1.282			0.075	0.106	2.074	1.934		0.926	0.076	1.442	1.655	4.231	0.358717
Q9UNN8	Endothelial protein C receptor OS=Homo sapiens OX=9606 GN=PROCR PE=1 SV=1	PROCR	24	5	56	5	26.7	1.39781e+07	1.569e+07	9.06736e+06	2.91624e+07	1.05242e+07	2.626e+07	8.85981e+06	1.4131e+07	3.49648e+06	2.10721e+07	1.02261e+07	1.57412e+07	0.89	1.973	0.937	3.07	1.222	1.382	0.774	1.548	0.345	1.59	1.114	0.975	0.693	0.0341983
P05455	Lupus La protein OS=Homo sapiens OX=9606 GN=SSB PE=1 SV=2	SSB	4	2	13	2	46.8	2.86429e+06	317834	2.27476e+06	121737	358654	3.05435e+06	411120	332151	1.62899e+06	330061	297685	2.479e+06	2.247	0.492	2.895	0.158	0.513	1.98	0.442	0.448	1.981	0.307	0.399	1.89	0.911	0.388157
P02749	Beta-2-glycoprotein 1 OS=Homo sapiens OX=9606 GN=APOH PE=1 SV=3	APOH	71	33	765	33	38.3	6.90503e+08	6.32312e+08	6.72708e+08	5.63491e+08	4.10003e+09	4.41806e+09	9.8079e+08	6.6074e+08	5.68322e+08	9.25098e+08	4.79503e+09	6.42896e+09	0.308	0.557	0.487	0.416	3.335	1.629	0.6	0.507	0.393	0.489	3.658	2.788	1.275	0.234274
Q96IY4	Carboxypeptidase B2 OS=Homo sapiens OX=9606 GN=CPB2 PE=1 SV=2	CPB2	37	12	115	12	48.4	2.20884e+07	2.13183e+07	2.88911e+07	3.26926e+07	1.21918e+08	4.95476e+07	4.71071e+07	2.21872e+07	1.49699e+07	4.28925e+07	1.14836e+08	5.82716e+07	0.435	0.829	0.923	1.063	4.373	0.806	1.272	0.751	0.457	1	3.864	1.115	1.255	0.788195
Q8N126	Cell adhesion molecule 3 OS=Homo sapiens OX=9606 GN=CADM3 PE=1 SV=1	CADM3	19	5	31	5	43.3				1.99223e+06		1.77259e+07	1.7157e+06		5.78171e+06	2.26818e+06	335753	3.47221e+06				0.655		2.913	0.468		1.783	0.534	0.114	0.671	0.523	0.412004
Q9Y2V2	Calcium-regulated heat-stable protein 1 OS=Homo sapiens OX=9606 GN=CARHSP1 PE=1 SV=2	CARHSP1	41	3	11	3	15.9	7.1008e+06	2.02815e+06	476333	4.16387e+06	1.87824e+06	1.39456e+07	6.76351e+06	718595	432695	6.65829e+06	2.4284e+06	1.25223e+07	1.363	0.769	0.148	1.321	0.657	2.212	1.781	0.237	0.129	1.514	0.797	2.337	0.984	0.638174
Q9H1C7	Cysteine-rich and transmembrane domain-containing protein 1 OS=Homo sapiens OX=9606 GN=CYSTM1 PE=1 SV=1	CYSTM1	10	1	1	1	10.6	1.03692e+06	804689	1.52439e+06			798880	917513	1.62806e+06	1.221e+06	2.20441e+06	484645	778405
Q96C86	m7GpppX diphosphatase OS=Homo sapiens OX=9606 GN=DCPS PE=1 SV=2	DCPS	7	2	2	2	38.6	1.46481e+06												0.946
O43598	2'-deoxynucleoside 5'-phosphate N-hydrolase 1 OS=Homo sapiens OX=9606 GN=DNPH1 PE=1 SV=1	DNPH1	13	2	5	2	19.1	473272	123877	351488	558611	194345	769977	195661	336490	623153	555445	162704	416415	1.128	0.583	1.36	2.201	0.844	1.517	0.64	1.38	2.303	1.569	0.663	0.965	1.127	0.888916
P26641	Elongation factor 1-gamma OS=Homo sapiens OX=9606 GN=EEF1G PE=1 SV=3	EEF1G	21	10	16	10	50.1	3.03128e+07	1.36722e+06	1.5337e+06	3.36293e+06	1.11245e+06	9.28529e+06	843674	2.89819e+06	1.46513e+06	8.38836e+06	1.61189e+06	8.23479e+06	4.886	0.435	0.401	0.896	0.327	1.237	0.187	0.804	0.366	1.602	0.444	1.29	1.165	0.638062
P16930	Fumarylacetoacetase OS=Homo sapiens OX=9606 GN=FAH PE=1 SV=2	FAH	2	1	3	1	46.3	1.27754e+06	433335	868328		1.21567e+06	806824	1.10778e+06		1.56532e+06	638184		536058
Q9BVM4	Gamma-glutamylaminecyclotransferase OS=Homo sapiens OX=9606 GN=GGACT PE=1 SV=2	GGACT	8	1	1	1	17.3
Q9NZ08	Endoplasmic reticulum aminopeptidase 1 OS=Homo sapiens OX=9606 GN=ERAP1 PE=1 SV=3	ERAP1	4	2	8	2	107.2		202666			28718.3	30261.3		8617.63			20402.8	22024.5		7.264			0.95	0.454		0.269			0.633	0.389	0.52	0.330258
P08709	Coagulation factor VII OS=Homo sapiens OX=9606 GN=F7 PE=1 SV=1	F7	27	7	31	7	51.6	6.94032e+06	5.74576e+06	7.38621e+06	2.64094e+06	9.5849e+06	3.5191e+07	1.1698e+07	9.72128e+06	468672	8.10633e+06	1.06716e+07	3.79588e+07	0.539	0.881	0.931	0.339	1.357	2.259	1.247	1.299	0.056	0.746	1.417	2.866	1.394	0.884336
P13284	Gamma-interferon-inducible lysosomal thiol reductase OS=Homo sapiens OX=9606 GN=IFI30 PE=1 SV=3	IFI30	8	1	1	1	27.9			742176	1.3366e+06		1.96729e+06
P01743	Immunoglobulin heavy variable 1-46 OS=Homo sapiens OX=9606 GN=IGHV1-46 PE=1 SV=2	IGHV1-46	35	9	229	2	12.9	5.05187e+06		2.91177e+06		4.21768e+06	1.85686e+07	4.88804e+06	5.63349e+06		5054733	5.16527e+06	1.51046e+07	0.646		0.604		0.983	1.961	0.857	1.239		0.765	1.129	1.877	1.144	0.314422
A0A0C4DH39	Immunoglobulin heavy variable 1-58 OS=Homo sapiens OX=9606 GN=IGHV1-58 PE=3 SV=1	IGHV1-58	13	3	11	1	13
P01817	Immunoglobulin heavy variable 2-5 OS=Homo sapiens OX=9606 GN=IGHV2-5 PE=1 SV=2	IGHV2-5	26	2	7	2	13.2	1.50462e+07	1.48067e+07	1.02375e+07	1.26763e+07	1.36145e+07	8.315e+06	410170	1.49629e+07	1.44654e+07	1.06748e+07	1.58648e+07	1.0057e+07	1.21	2.352	1.336	1.685	1.996	0.553	0.045	2.07	1.804	1.017	2.182	0.786	0.898	0.392255
A0A0B4J1V2	Immunoglobulin heavy variable 2-26 OS=Homo sapiens OX=9606 GN=IGHV2-26 PE=3 SV=1	IGHV2-26	18	2	59	2	13.2	1.38043e+07	1.78338e+07	7.74437e+06	6.81401e+06	1.58263e+07	1.85545e+07	1.69969e+07	2.44124e+07	1.0589e+07	1.41167e+07	1.38918e+07	2.13562e+07	0.861	2.197	0.784	0.703	1.799	0.956	1.455	2.62	1.024	1.043	1.482	1.295	1.308	0.0582246
P01780	Immunoglobulin heavy variable 3-7 OS=Homo sapiens OX=9606 GN=IGHV3-7 PE=1 SV=2	IGHV3-7	49	10	538	2	12.9	2.57039e+08	2.05609e+08	1.27272e+08	2.28879e+08	2.76776e+08	1.2768e+08	3.06331e+08	1.88576e+08	1.549e+08	2.30795e+08	2.93717e+08	1.37129e+08	1.151	1.818	0.925	1.694	2.259	0.472	1.882	1.453	1.075	1.224	2.249	0.597	1.097	0.68084
P01782	Immunoglobulin heavy variable 3-9 OS=Homo sapiens OX=9606 GN=IGHV3-9 PE=1 SV=2	IGHV3-9	58	9	284	6	12.9	1.65659e+08	1.50046e+08	7.59934e+07	1.5365e+08	2.9164e+08	1.00757e+08	1.7263e+08	1.60646e+08	9.04793e+07	1.43587e+08	3.04887e+08	1.22666e+08	0.973	1.74	0.724	1.491	3.122	0.489	1.391	1.623	0.824	0.999	3.062	0.7	1.097	0.636374
P01762	Immunoglobulin heavy variable 3-11 OS=Homo sapiens OX=9606 GN=IGHV3-11 PE=1 SV=2	IGHV3-11	51	9	274	4	12.9	9.99194e+06	3.13903e+06	1.80906e+06	3.50135e+06	1.91837e+06	2.95904e+06	1.36534e+07	3.58494e+06	2.5688e+06	2882593	6.04178e+06	5.64489e+06	1.966	1.219	0.577	1.138	0.688	0.481	3.685	1.213	0.783	0.672	2.032	1.079	1.669	0.170877
P01766	Immunoglobulin heavy variable 3-13 OS=Homo sapiens OX=9606 GN=IGHV3-13 PE=1 SV=2	IGHV3-13	42	8	336	1	12.5	694514	2.93775e+06		799390	3.1732e+06		3.43642e+06	1.57722e+06		6.57819e+06		526242
A0A0B4J1V0	Immunoglobulin heavy variable 3-15 OS=Homo sapiens OX=9606 GN=IGHV3-15 PE=3 SV=1	IGHV3-15	58	11	313	5	12.9	4.48987e+08	2.29955e+08	2.17223e+08	3.48855e+08	2.44245e+08	2.79192e+08	5.08212e+08	2.47087e+08	2.38525e+08	3.47628e+08	4.49513e+08	3.28726e+08	1.311	1.326	1.029	1.683	1.3	0.673	2.035	1.241	1.079	1.202	2.244	0.933	1.227	0.297798
A0A075B6R2	Immunoglobulin heavy variable 4-4 OS=Homo sapiens OX=9606 GN=IGHV4-4 PE=3 SV=2	IGHV4-4	43	8	145	1	12.8					5.82414e+06	6.68552e+06	2.16594e+06				6.27648e+06
A0A0C4DH34	Immunoglobulin heavy variable 4-28 OS=Homo sapiens OX=9606 GN=IGHV4-28 PE=3 SV=1	IGHV4-28	27	4	167	1	13.1	3.44613e+07	4.29791e+07	3.53639e+07	6.85255e+07	5.87888e+07	1.12436e+08	4.69178e+07	3.39868e+07	9.43303e+07	8.81674e+07	6.59227e+07	9.75988e+07
P06331	Immunoglobulin heavy variable 4-34 OS=Homo sapiens OX=9606 GN=IGHV4-34 PE=1 SV=2	IGHV4-34	48	9	306	1	13.8	5.78541e+06	3.87422e+06	4.73973e+06	3.2589e+06	5.44499e+06	1.20547e+07	1.23247e+07	3.84911e+06	8.79377e+06	3.84393e+06	5.55144e+06	9.35632e+06
A0A0C4DH35	Probable non-functional immunoglobulin heavy variable 3-35 OS=Homo sapiens OX=9606 GN=IGHV3-35 PE=1 SV=1	IGHV3-35	44	8	240	2	12.8	5.77849e+07	4.59769e+07	3.70671e+07	3.78483e+07	5.34025e+07	1.69593e+06	5.92668e+07	5.95894e+07	3.39088e+07	4.24976e+07	5.18219e+07	1.79524e+06	1.359	2.135	1.414	1.471	2.289	0.033	1.912	2.411	1.236	1.184	2.084	0.041	1.061	0.682216
A0A0C4DH36	Probable non-functional immunoglobulin heavy variable 3-38 OS=Homo sapiens OX=9606 GN=IGHV3-38 PE=1 SV=1	IGHV3-38	9	1	6	1	12.8	1.01758e+07	7.48512e+06		2.58702e+06	1.88398e+07	3.55612e+06	1.28022e+07	4.62614e+06		6.18049e+06	1.63348e+07	3.95852e+06
A0A0B4J1X8	Immunoglobulin heavy variable 3-43 OS=Homo sapiens OX=9606 GN=IGHV3-43 PE=3 SV=1	IGHV3-43	52	8	198	2	13.1	4.31558e+07	1.49188e+07	1.3536e+06	2.29271e+07	7.91886e+06	1.58771e+07	3.9019e+07	5.94008e+06	1.0603e+07	31822938	1.08652e+07	2.03738e+07	2.179	1.488	0.111	1.913	0.729	0.662	2.703	0.516	0.83	1.904	0.938	1	2.143	0.484548
P01763	Immunoglobulin heavy variable 3-48 OS=Homo sapiens OX=9606 GN=IGHV3-48 PE=1 SV=2	IGHV3-48	57	11	530	2	12.8	3.49994e+08	3.71438e+08	2.63019e+08	2.54125e+08	4.78997e+08	2.86934e+08	4.57102e+08	3.81418e+08	2.56314e+08	3.40936e+08	5.25902e+08	3.25721e+08	0.926	1.94	1.129	1.111	2.309	0.627	1.658	1.735	1.051	1.068	2.378	0.837	1.157	0.353243
A0A0A0MS15	Immunoglobulin heavy variable 3-49 OS=Homo sapiens OX=9606 GN=IGHV3-49 PE=3 SV=1	IGHV3-49	67	11	124	6	13	1.41883e+08	1.32002e+08	6.48566e+07	7.8744e+07	2.89493e+08	1.25292e+08	1.86043e+08	1.52262e+08	7.21207e+07	1.30783e+08	3.73986e+08	1.1851e+08	0.863	1.586	0.64	0.792	3.209	0.63	1.552	1.593	0.68	0.942	3.89	0.701	1.23	0.0781441
P01767	Immunoglobulin heavy variable 3-53 OS=Homo sapiens OX=9606 GN=IGHV3-53 PE=1 SV=2	IGHV3-53	61	11	318	2	12.8	4.96264e+07	2.23403e+07	5.82586e+06	1.50183e+07	2.24565e+07	3.67146e+07	5.89682e+07	2.2446e+07	8.65023e+06	16315526	3.2043e+07	3.79181e+07	1.716	1.525	0.327	0.858	1.415	1.049	2.796	1.335	0.464	0.668	1.894	1.274	1.209	0.240777
A0A075B6Q5	Immunoglobulin heavy variable 3-64 OS=Homo sapiens OX=9606 GN=IGHV3-64 PE=3 SV=1	IGHV3-64	52	8	135	3	12.9	5.25129e+06	5.93629e+06	3.02088e+06	3.30295e+06	1.50368e+07	6.55897e+06	3.98804e+06	7.69473e+06	2.02463e+06	3.4269e+06	1.17642e+07	7.36009e+06	0.791	1.765	0.738	0.822	4.127	0.816	0.824	1.993	0.473	0.611	3.029	1.077	0.935	0.425081
Q9Y4L1	Hypoxia up-regulated protein 1 OS=Homo sapiens OX=9606 GN=HYOU1 PE=1 SV=1	HYOU1	5	5	19	5	111.3	1.20907e+07	7.87618e+06	2.51642e+06	4.76041e+06	1.25129e+07	3.8641e+07	1.59113e+07	6.40205e+06	1.01883e+06	12782781	1.14899e+07	1.75071e+07	0.956	1.23	0.323	0.622	1.804	2.525	1.726	0.871	0.125	1.198	1.554	1.346	1.037	0.62511
A0A0C4DH42	Immunoglobulin heavy variable 3-66 OS=Homo sapiens OX=9606 GN=IGHV3-66 PE=3 SV=1	IGHV3-66	58	9	267	1	12.7	6.58782e+07	3.08439e+06	5.63525e+06	9.75337e+06	1.03112e+07	9.993e+06	5.75436e+07	1.91195e+07	5.01941e+06	9750306	2.0268e+07	1.04929e+07
A0A0B4J1V6	Immunoglobulin heavy variable 3-73 OS=Homo sapiens OX=9606 GN=IGHV3-73 PE=3 SV=1	IGHV3-73	40	6	137	4	12.8	1.82667e+07	8.47283e+06	8.37685e+06	1.48891e+07	1.34039e+07	6.2365e+06	2.02278e+07	1.26978e+07	1.28838e+07	1.43904e+07	1.46807e+07	6.46646e+06	1.373	1.258	1.022	1.85	1.836	0.387	2.086	1.642	1.501	1.281	1.887	0.472	1.206	0.250996
A0A0B4J1X5	Immunoglobulin heavy variable 3-74 OS=Homo sapiens OX=9606 GN=IGHV3-74 PE=3 SV=1	IGHV3-74	51	9	412	1	12.8	3.27622e+06	4.53845e+06	4.00659e+06	4.51617e+06	5.57197e+06	384729	4.15942e+06	4.99065e+06	3.32989e+06	4.3751e+06	4.87323e+06	400207
P01824	Immunoglobulin heavy variable 4-39 OS=Homo sapiens OX=9606 GN=IGHV4-39 PE=1 SV=2	IGHV4-39	49	10	301	2	13.9	4.65803e+06	6.23894e+06	1.06801e+06	8.84544e+06	4.64364e+06	1.00928e+07	7.79416e+06	1.49143e+06	6.84398e+06	5.9997e+06	6.24352e+06	1.46003e+07	0.673	1.781	0.251	2.113	1.223	1.206	1.545	0.371	1.534	1.027	1.543	2.051	2.011	0.717875
P01825	Immunoglobulin heavy variable 4-59 OS=Homo sapiens OX=9606 GN=IGHV4-59 PE=1 SV=2	IGHV4-59	62	11	337	1	12.9	1.27386e+09	1.41309e+09	1.223e+09	1.13866e+09	1.42493e+09	9.52158e+08	1.34542e+09	1.16796e+09	1.18927e+09	1.20423e+09	1.55546e+09	1.0366e+09
A0A0J9YXX1	Immunoglobulin heavy variable 5-10-1 OS=Homo sapiens OX=9606 GN=IGHV5-10-1 PE=3 SV=1	IGHV5-10-1	56	7	130	4	12.8	1.35599e+08	2.36368e+07	5.40551e+07	5.13418e+07	3.39444e+07	1.24597e+08	1.11989e+08	2.08388e+07	5.14493e+07	5.96919e+07	4.33125e+07	1.30704e+08	1.83	0.63	1.184	1.145	0.835	1.389	2.073	0.484	1.076	0.954	0.999	1.714	1.012	0.957756
O75874	Isocitrate dehydrogenase [NADP] cytoplasmic OS=Homo sapiens OX=9606 GN=IDH1 PE=1 SV=2	IDH1	9	4	9	4	46.6	2.55457e+06	313367	1.26256e+06	557060	1.77986e+06	397120		1.15222e+06	4.30126e+06	890218	360131	765225	1.854	0.449	1.487	0.668	2.355	0.238		1.439	4.84	0.765	0.447	0.54	2.013	0.571453
A0A0B4J1U7	Immunoglobulin heavy variable 6-1 OS=Homo sapiens OX=9606 GN=IGHV6-1 PE=3 SV=1	IGHV6-1	38	4	43	4	13.5	3.41818e+07	1.32353e+07	3.29552e+07	5.82625e+07	5.21716e+07	9.29541e+07	4.15019e+07	1.69263e+07	4.13736e+07	6.59514e+07	5.85303e+07	6.93189e+07	0.672	0.514	1.051	1.893	1.869	1.51	1.119	0.572	1.261	1.536	1.967	1.325	1.12	0.45063
A0A0J9YX35	Immunoglobulin heavy variable 3-64D OS=Homo sapiens OX=9606 GN=IGHV3-64D PE=3 SV=1	IGHV3-64D	44	12	330	1	12.8	2.50894e+07	3.8588e+06	1.01851e+07	1.30123e+07	1.91846e+07	2.11245e+07	2.97999e+07	1.07749e+07	1.42095e+07	1.39122e+07	1.94583e+07	2.30258e+07
A0A0B4J2H0	Immunoglobulin heavy variable 1-69D OS=Homo sapiens OX=9606 GN=IGHV1-69D PE=1 SV=1	IGHV1-69D	43	9	251	2	12.7	1.03141e+07	2.08358e+06	1.87441e+07	4.05827e+06	1.7176e+07	2.47127e+07	1.62658e+07	3.70018e+06	2.04844e+07	2.3684e+07	2.51053e+07	2.39457e+07	0.615	0.245	1.814	0.4	1.867	1.218	1.331	0.38	1.894	1.674	2.561	1.388	1.909	0.0553357
A0A0J9YVY3	Immunoglobulin heavy variable 7-4-1 OS=Homo sapiens OX=9606 GN=IGHV7-4-1 PE=3 SV=1	IGHV7-4-1	44	6	178	5	12.8	4.72889e+07	3.65923e+07	2.70219e+07	3.04548e+07	4.23146e+07	2.70342e+07	6.39172e+07	3.44197e+07	3.42478e+07	2.83171e+07	7.09081e+07	3.25004e+07	1.13	1.727	1.048	1.203	1.843	0.534	2.095	1.415	1.269	0.802	2.897	0.755	1.256	0.34723
P0DP03	Immunoglobulin heavy variable 3-30-5 OS=Homo sapiens OX=9606 GN=IGHV3-30-5 PE=3 SV=1	IGHV3-30-5	55	8	251	4	12.9	3.4711e+07	3.26572e+07	1.11854e+07	1.77424e+07	6.7117e+07	4.13081e+07	4.32205e+07	2.99334e+07	1.20765e+07	2.59945e+07	7.6796e+07	4.16561e+07	0.907	1.685	0.474	0.766	3.196	0.892	1.549	1.345	0.489	0.805	3.431	1.058	1.141	0.346136
P0DP08	Immunoglobulin heavy variable 4-38-2 OS=Homo sapiens OX=9606 GN=IGHV4-38-2 PE=3 SV=1	IGHV4-38-2	62	10	336	1	13					1.57268e+06			841924			1.57581e+06
P48735	Isocitrate dehydrogenase [NADP], mitochondrial OS=Homo sapiens OX=9606 GN=IDH2 PE=1 SV=2	IDH2	2	1	2	1	50.9	667419		616307						454160	512331	337682	59445.1
Q14116	Interleukin-18 OS=Homo sapiens OX=9606 GN=IL18 PE=1 SV=1	IL18	4	1	2	1	22.3
Q8N1N4	Keratin, type II cytoskeletal 78 OS=Homo sapiens OX=9606 GN=KRT78 PE=1 SV=2	KRT78	24	12	29	8	56.8	875287	950663	986981	902216	1.42217e+06	405821	1.8908e+06	997073	1.08925e+06	3.20417e+07	1.20736e+06	443467	0.23	0.493	0.421	0.392	0.681	0.088	0.681	0.45	0.444	9.97	0.542	0.113	5.407	0.239909
Q9NPH3	Interleukin-1 receptor accessory protein OS=Homo sapiens OX=9606 GN=IL1RAP PE=1 SV=2	IL1RAP	8	5	27	5	65.4	3.99573e+06	9.32475e+06	4.82516e+06	6.65802e+06	4.15975e+06	4.01865e+06	4.23159e+06	7.46479e+06	3.5404e+06	5813455	5.35567e+06	2.65497e+06	0.731	3.369	1.432	2.013	1.387	0.607	1.062	2.349	1.004	1.26	1.675	0.472	0.91	0.345548
P21266	Glutathione S-transferase Mu 3 OS=Homo sapiens OX=9606 GN=GSTM3 PE=1 SV=3	GSTM3	13	3	6	3	26.5			560674	884702	79615.2	142284		494137	444585	759394	223896	70541.4			2.116	3.401	0.338	0.273		1.977	1.603	2.092	0.89	0.159	1.147	0.828319
Q6UWW0	Lipocalin-15 OS=Homo sapiens OX=9606 GN=LCN15 PE=1 SV=1	LCN15	22	2	4	2	20.4			2.49082e+06						1.91075e+06						1.737						1.273				0.733
P09382	Galectin-1 OS=Homo sapiens OX=9606 GN=LGALS1 PE=1 SV=2	LGALS1	59	7	60	7	14.7	4.6904e+07	1.13756e+07	6.135e+06	6.27191e+06	1.21461e+07	1.1942e+08	3.11138e+07	1.33892e+07	5.87482e+06	1.34659e+07	1.39747e+07	1.097e+08	1.366	0.654	0.29	0.302	0.645	2.874	1.243	0.671	0.265	0.465	0.696	3.105	1.091	0.407758
P01011	Alpha-1-antichymotrypsin OS=Homo sapiens OX=9606 GN=SERPINA3 PE=1 SV=2	SERPINA3	66	46	1363	19	47.6	3.10611e+09	2.5994e+09	6.93788e+09	3.85478e+09	7.03881e+09	3.58355e+09	4.62741e+09	1.98654e+09	2.8276e+09	2.92268e+09	4.31785e+09	2.88238e+09	0.755	1.248	2.737	1.549	3.119	0.72	1.543	0.831	1.066	0.842	1.795	0.681	0.861	0.247967
P19801	Amiloride-sensitive amine oxidase [copper-containing] OS=Homo sapiens OX=9606 GN=AOC1 PE=1 SV=4	AOC1	4	2	3	2	85.3	1.00896e+06	66921.8		393018		912032	706285	591737	1.25772e+06	485511		1.20434e+06	1.296	0.17		0.834		0.968	1.245	1.308	2.505	0.739		1.504	2.774	0.33188
P31944	Caspase-14 OS=Homo sapiens OX=9606 GN=CASP14 PE=1 SV=2	CASP14	21	5	20	5	27.7	1.53753e+07	9.39107e+06	8.0724e+06		1.50701e+07	4.872e+06	1.36386e+07		9.57467e+06	1.87095e+07	8.41288e+06	7.57436e+06	1.314	1.585	1.119		2.347	0.344	1.599		1.268	1.894	1.229	0.629	1.176	0.807383
Q96DG6	Carboxymethylenebutenolidase homolog OS=Homo sapiens OX=9606 GN=CMBL PE=1 SV=1	CMBL	6	1	4	1	28	239877		206776	422615		928030		193410	393993	109053	169485	623511
Q6UX73	UPF0764 protein C16orf89 OS=Homo sapiens OX=9606 GN=C16orf89 PE=1 SV=2	C16orf89	3	1	3	1	45.4
P00403	Cytochrome c oxidase subunit 2 OS=Homo sapiens OX=9606 GN=MT-CO2 PE=1 SV=1	MT-CO2	4	1	2	1	25.5	2.74586e+06									1.03836e+06
P55259	Pancreatic secretory granule membrane major glycoprotein GP2 OS=Homo sapiens OX=9606 GN=GP2 PE=1 SV=3	GP2	2	1	1	1	59.4
Q02747	Guanylin OS=Homo sapiens OX=9606 GN=GUCA2A PE=1 SV=2	GUCA2A	33	2	11	2	12.4						2.97588e+06	1.35574e+06					1.76025e+06						1.145	0.866					0.797	0.696
P00338	L-lactate dehydrogenase A chain OS=Homo sapiens OX=9606 GN=LDHA PE=1 SV=2	LDHA	26	9	47	8	36.7	7.83117e+07	2.56556e+06	1.41404e+07	1.01136e+07	5.5109e+06	1.43268e+07	1.01415e+07	7.38882e+06	2.7987e+07	3.41729e+07	6.49751e+06	8.11055e+06	4.054	0.262	1.188	0.865	0.52	0.613	0.72	0.658	2.246	2.096	0.575	0.408	1.462	0.876312
P15311	Ezrin OS=Homo sapiens OX=9606 GN=EZR PE=1 SV=4	EZR	13	8	26	5	69.4	1.00575e+07	152137	1.5887e+06	926729	481390	2.93353e+06	1.22652e+06		3.25129e+06	6.80889e+06	442831	1.40147e+06	3.575	0.107	0.916	0.544	0.312	0.862	0.598		1.792	2.867	0.269	0.484	1.763	0.953476
P30040	Endoplasmic reticulum resident protein 29 OS=Homo sapiens OX=9606 GN=ERP29 PE=1 SV=4	ERP29	10	2	2	2	29							1.1257e+06												1.297
P00740	Coagulation factor IX OS=Homo sapiens OX=9606 GN=F9 PE=1 SV=2	F9	35	13	134	13	51.7	7.70018e+07	3.06306e+07	5.52734e+07	4.20037e+07	1.29388e+08	2.07588e+08	7.44179e+07	3.89446e+07	3.10679e+07	6.5292e+07	1.41146e+08	1.91786e+08	0.806	0.633	0.939	0.727	2.468	1.795	1.068	0.701	0.504	0.809	2.526	1.951	1.032	0.975094
Q9NSA1	Fibroblast growth factor 21 OS=Homo sapiens OX=9606 GN=FGF21 PE=1 SV=1	FGF21	11	1	3	1	22.3						4.67618e+06						1.97732e+06
Q9NY12	H/ACA ribonucleoprotein complex subunit 1 OS=Homo sapiens OX=9606 GN=GAR1 PE=1 SV=1	GAR1	4	1	1	1	22.3
P04259	Keratin, type II cytoskeletal 6B OS=Homo sapiens OX=9606 GN=KRT6B PE=1 SV=5	KRT6B	60	48	185	2	60	3.36345e+06	1.01199e+06		1.41011e+06	1.99952e+06	1.39983e+06	215072	328190	359165	6.34041e+07	1.15556e+06	655536	0.465	0.276		0.322	0.504	0.16	0.041	0.078	0.077	10.378	0.273	0.088	6.738	0.788432
Q15181	Inorganic pyrophosphatase OS=Homo sapiens OX=9606 GN=PPA1 PE=1 SV=2	PPA1	14	2	4	2	32.6	936717	1.4315e+06			1.4394e+06	708831	1.51372e+06	1.15671e+06		814901	1.05812e+06	2.15405e+06	0.711	2.146			1.992	0.445	1.576	1.51		0.733	1.373	1.589	1.795	0.476738
P48668	Keratin, type II cytoskeletal 6C OS=Homo sapiens OX=9606 GN=KRT6C PE=1 SV=3	KRT6C	60	47	187	2	60										3.95144e+06												1.12
P15586	N-acetylglucosamine-6-sulfatase OS=Homo sapiens OX=9606 GN=GNS PE=1 SV=3	GNS	27	12	67	12	62	2.4918e+07	4.86573e+06	2.78597e+07	6.04312e+07	4.65305e+06	2.32338e+07	1.42187e+07	1.95023e+07	3.58107e+07	1.11852e+07	4.70119e+06	8.66301e+06	1.178	0.454	2.138	4.723	0.401	0.908	0.922	1.586	2.625	0.627	0.38	0.398	1.17	0.5557
O00461	Golgi integral membrane protein 4 OS=Homo sapiens OX=9606 GN=GOLIM4 PE=1 SV=1	GOLIM4	2	1	1	1	81.8	154700					122632						221638
Q92769	Histone deacetylase 2 OS=Homo sapiens OX=9606 GN=HDAC2 PE=1 SV=2	HDAC2	7	2	2	2	55.3	294690												0.946
P17096	High mobility group protein HMG-I/HMG-Y OS=Homo sapiens OX=9606 GN=HMGA1 PE=1 SV=3	HMGA1	30	3	4	3	11.7	3.34642e+06	728716	657876	891799	1.33046e+06	1.1973e+06	2.56012e+06	871933	864631	2.28136e+06	1.2607e+06	978739	2.238	0.962	0.714	0.986	1.622	0.662	2.349	1.003	0.897	1.808	1.442	0.636	1.172	0.284385
P40189	Interleukin-6 receptor subunit beta OS=Homo sapiens OX=9606 GN=IL6ST PE=1 SV=2	IL6ST	2	1	6	1	103.5	234898		137860	1.59098e+06	472823					185947		114287
P08729	Keratin, type II cytoskeletal 7 OS=Homo sapiens OX=9606 GN=KRT7 PE=1 SV=5	KRT7	12	6	28	2	51.4			409116						1.01978e+06						0.879						2.093				2.381
P12277	Creatine kinase B-type OS=Homo sapiens OX=9606 GN=CKB PE=1 SV=1	CKB	16	3	4	3	42.6					442899	429232	901092				813272	578405					1.206	0.53	1.847				2.078	0.84	1.654	0.0528371
P60709	Actin, cytoplasmic 1 OS=Homo sapiens OX=9606 GN=ACTB PE=1 SV=1	ACTB	56	25	214	13	41.7	7.68978e+08	2.79199e+07	1.25403e+08	5.11479e+07	1.0062e+08	1.23207e+08	6.70863e+07	3.11224e+07	1.53614e+08	4.02882e+08	8.97002e+07	1.16498e+08	4.241	0.304	1.122	0.466	1.011	0.561	0.507	0.295	1.313	2.632	0.846	0.624	1.643	0.915177
O15467	C-C motif chemokine 16 OS=Homo sapiens OX=9606 GN=CCL16 PE=1 SV=1	CCL16	45	3	5	3	13.6	577373				701365	792519						8.28818e+06	0.211				0.467	0.239						2.942	12.31
P28906	Hematopoietic progenitor cell antigen CD34 OS=Homo sapiens OX=9606 GN=CD34 PE=1 SV=2	CD34	4	2	2	2	40.7	1.74662e+06	191875	161649		72293	212148	453414	79705.7	443378	358823		308032	4.102	0.89	0.616		0.309	0.412	1.461	0.322	1.614	0.998		0.703	1.261	0.807851
P00748	Coagulation factor XII OS=Homo sapiens OX=9606 GN=F12 PE=1 SV=3	F12	32	16	163	16	67.7	5.86753e+07	3.89328e+07	6.44962e+07	7.41256e+07	2.15748e+08	6.58648e+07	1.20632e+08	6.19179e+07	2.38555e+07	1.18766e+08	2.90078e+08	6.59091e+07	0.555	0.728	0.991	1.16	3.722	0.515	1.566	1.008	0.35	1.332	4.695	0.606	1.358	0.624433
P62942	Peptidyl-prolyl cis-trans isomerase FKBP1A OS=Homo sapiens OX=9606 GN=FKBP1A PE=1 SV=2	FKBP1A	42	7	61	7	11.9	5.39529e+07	5.38573e+06	1.38071e+07	765513	1.13979e+07	1.00228e+08	7.72616e+07	6.5777e+06	1.00393e+07	8.2168e+06	9.66549e+06	1.1322e+08	1.492	0.294	0.619	0.035	0.574	2.29	2.93	0.313	0.43	0.269	0.457	3.043	2.256	0.303679
Q10471	Polypeptide N-acetylgalactosaminyltransferase 2 OS=Homo sapiens OX=9606 GN=GALNT2 PE=1 SV=1	GALNT2	3	2	3	2	64.7	1.08176e+08	7.05843e+07	1.51613e+08	8.28389e+07	1.79416e+08	7.08119e+07	1.36034e+08	3.70162e+07	5.66451e+07	51314120	1.30185e+08	5.73856e+07	1.085	1.398	2.467	1.373	3.279	0.587	1.871	0.638	0.88	0.609	2.232	0.559	0.769	0.141134
Q96AE4	Far upstream element-binding protein 1 OS=Homo sapiens OX=9606 GN=FUBP1 PE=1 SV=3	FUBP1	3	2	3	1	67.5	1.40729e+06
Q9Y2T3	Guanine deaminase OS=Homo sapiens OX=9606 GN=GDA PE=1 SV=1	GDA	3	1	2	1	51
Q16661	Guanylate cyclase activator 2B OS=Homo sapiens OX=9606 GN=GUCA2B PE=1 SV=1	GUCA2B	43	3	28	3	12.1	9.97862e+07	6.65845e+07	7.91211e+07	1.92955e+07	4.85521e+07	7.15127e+07	5.44204e+07	6.80333e+07	7.09344e+07	45147240	7.88601e+07	8.14017e+07	1.445	1.904	1.86	0.462	1.282	0.856	1.081	1.695	1.593	0.775	1.953	1.146	1.172	0.458262
A2NJV5	Immunoglobulin kappa variable 2-29 OS=Homo sapiens OX=9606 GN=IGKV2-29 PE=3 SV=2	IGKV2-29	53	9	217	2	13.1	3.2714e+07	1.82552e+07	1.7448e+07	1.99898e+07	2.60281e+07	6.03031e+07	2.44586e+07	2.0793e+07	2.02901e+07	2.45491e+07	2.73481e+07	4.12896e+07	1.114	1.227	0.964	1.125	1.615	1.696	1.142	1.217	1.071	0.99	1.592	1.366	0.967	0.438067
P14625	Endoplasmin OS=Homo sapiens OX=9606 GN=HSP90B1 PE=1 SV=1	HSP90B1	8	5	6	5	92.4	4.93928e+06	1.36259e+06	2.11728e+06	1.27526e+06	469941	1.33019e+06	2.60536e+06	1.87151e+06	1.50979e+06	1.66621e+06	1.65024e+06	457281	2.638	1.437	1.835	1.126	0.457	0.587	1.908	1.719	1.25	1.054	1.507	0.237	1.206	0.86612
P51161	Gastrotropin OS=Homo sapiens OX=9606 GN=FABP6 PE=1 SV=2	FABP6	55	5	57	5	14.4	4.64092e+07	8.15714e+07	4.24513e+07	4.06502e+07	6.92817e+07	1.36855e+08	5.60679e+07	4.74345e+07	1.99465e+07	9.71875e+07	6.48768e+07	1.79147e+08	0.597	2.073	0.887	0.865	1.625	1.455	0.99	1.05	0.398	1.482	1.428	2.241	1.124	0.931486
P06734	Low affinity immunoglobulin epsilon Fc receptor OS=Homo sapiens OX=9606 GN=FCER2 PE=1 SV=1	FCER2	3	1	2	1	36.4
P20930	Filaggrin OS=Homo sapiens OX=9606 GN=FLG PE=1 SV=3	FLG	13	17	38	17	434.9	3.26113e+06	829626	351747	1.59496e+06	1.00223e+06	1.24121e+06	2.70876e+06	1.51878e+06	638051	1.93041e+07	941876	963287	1.077	0.541	0.189	0.871	0.603	0.339	1.228	0.863	0.327	7.555	0.532	0.309	2.489	0.199323
Q14376	UDP-glucose 4-epimerase OS=Homo sapiens OX=9606 GN=GALE PE=1 SV=2	GALE	5	2	74	2	38.3	4.64925e+06	1.529e+07	1.30353e+07	1.49589e+07	7.58938e+06	8.59301e+06	8.80606e+06	2.10157e+07	1.79001e+07	1.65848e+07	1.17297e+07	9.56711e+06	0.352	2.289	1.604	1.874	1.049	0.538	0.916	2.741	2.104	1.489	1.52	0.705	1.444	0.110063
P08238	Heat shock protein HSP 90-beta OS=Homo sapiens OX=9606 GN=HSP90AB1 PE=1 SV=4	HSP90AB1	28	18	44	10	83.2	3.47912e+07	1.52144e+06	1.42227e+06	909678		1.07156e+07	484636	1.51306e+06	1.208e+06	3.7598e+06		5.38178e+06	5.333	0.461	0.354	0.23		1.357	0.102	0.399	0.287	0.683		0.802	1.051	0.426439
P01591	Immunoglobulin J chain OS=Homo sapiens OX=9606 GN=JCHAIN PE=1 SV=4	JCHAIN	64	7	121	7	18.1	8.43313e+07	5.49305e+07	1.33842e+07	5.05042e+07	4.5054e+07	3.45168e+08	6.4978e+07	6.6005e+07	4.69618e+07	7.14455e+07	4.90661e+07	2.10115e+08	0.869	1.117	0.224	0.86	0.846	2.938	0.918	1.169	0.75	0.872	0.864	2.104	1.367	0.472304
Q8N8K9	Uncharacterized protein KIAA1958 OS=Homo sapiens OX=9606 GN=KIAA1958 PE=1 SV=1	KIAA1958	1	1	2	1	79.2
Q04760	Lactoylglutathione lyase OS=Homo sapiens OX=9606 GN=GLO1 PE=1 SV=4	GLO1	5	1	1	1	20.8	1.72049e+06		2.20377e+06							1.33932e+06		2.41317e+06
P0DSN7	Probable non-functional immunoglobulinn kappa variable 1D-37 OS=Homo sapiens OX=9606 GN=IGKV1D-37 PE=1 SV=1	IGKV1D-37	29	10	140	4	12.7	2.38425e+07	1.7828e+07	4.32027e+06	1.66991e+07	1.18585e+07	6.29477e+07	3.39123e+07	1.48847e+07	4.27514e+06	1.71939e+07	1.38227e+07	4.89512e+07	1	1.477	0.294	1.158	0.907	2.182	1.952	1.074	0.278	0.855	0.992	1.996	1.062	0.992671
Q96AG4	Leucine-rich repeat-containing protein 59 OS=Homo sapiens OX=9606 GN=LRRC59 PE=1 SV=1	LRRC59	4	1	1	1	34.9	921862
P28676	Grancalcin OS=Homo sapiens OX=9606 GN=GCA PE=1 SV=2	GCA	3	1	1	1	24	339806					204283			375289	566338		309653
P11142	Heat shock cognate 71 kDa protein OS=Homo sapiens OX=9606 GN=HSPA8 PE=1 SV=1	HSPA8	32	18	80	11	70.9	9.15422e+07	3.48055e+07	7.85087e+07	1.01073e+08	2.37883e+08	1.61598e+08	9.6154e+07	1.34102e+07	6.69635e+07	1.95902e+08	2.57225e+08	2.18953e+08	0.669	0.502	0.93	1.22	3.167	0.975	0.963	0.168	0.758	1.695	3.212	1.554	1.098	0.933162
P01893	Putative HLA class I histocompatibility antigen, alpha chain H OS=Homo sapiens OX=9606 GN=HLA-H PE=5 SV=3	HLA-H	15	5	22	1	40.9				116252	196254	5.71326e+06					191912	289182
P18065	Insulin-like growth factor-binding protein 2 OS=Homo sapiens OX=9606 GN=IGFBP2 PE=1 SV=2	IGFBP2	40	10	91	10	34.8	1.75693e+07	9.88337e+06	1.32925e+07	1.02006e+07	4.15694e+07	1.47106e+08	8.07562e+06	1.20612e+07	1.15267e+07	8.51993e+06	4.23321e+07	8.53252e+07	0.489	0.544	0.601	0.47	2.111	3.386	0.309	0.578	0.498	0.281	2.016	2.31	0.793	0.0442298
O95373	Importin-7 OS=Homo sapiens OX=9606 GN=IPO7 PE=1 SV=1	IPO7	1	1	1	1	119.4	463523		83478.5					61235.8	82514.8
P50570	Dynamin-2 OS=Homo sapiens OX=9606 GN=DNM2 PE=1 SV=2	DNM2	1	1	1	1	98
P49411	Elongation factor Tu, mitochondrial OS=Homo sapiens OX=9606 GN=TUFM PE=1 SV=2	TUFM	12	5	5	5	49.5	3.00695e+06			494593				1.21967e+06	374904	1.04841e+06			2.314			0.629				1.615	0.447	0.956			1.52
Q71UI9	Histone H2A.V OS=Homo sapiens OX=9606 GN=H2AZ2 PE=1 SV=3	H2AZ2	29	4	26	2	13.5	1.38273e+07				1.01827e+06		942124		545130	1.1632e+06		1.72887e+06	4.082				0.548		0.381		0.249	0.407		0.496	0.093
P14866	Heterogeneous nuclear ribonucleoprotein L OS=Homo sapiens OX=9606 GN=HNRNPL PE=1 SV=2	HNRNPL	7	4	5	2	64.1	4.21171e+06	2.42572e+06	2.02563e+06	677506	2.02583e+06	1.70945e+07	4.62874e+06	916290	1.91489e+06	3718263	2.84256e+06	1.45003e+07	0.839	0.954	0.655	0.223	0.735	2.814	1.265	0.314	0.591	0.877	0.968	2.807	1.498	0.688605
Q12906	Interleukin enhancer-binding factor 3 OS=Homo sapiens OX=9606 GN=ILF3 PE=1 SV=3	ILF3	16	10	15	10	95.3	1.2104e+07	3.59442e+06	67716	3.55675e+06	352237	2.23069e+06	201837		179791	3.25738e+06	176681	1.71245e+06	4.591	2.692	0.042	2.229	0.243	0.699	0.105		0.106	1.463	0.115	0.631	0.916	0.355336
A0A0C4DH31	Immunoglobulin heavy variable 1-18 OS=Homo sapiens OX=9606 GN=IGHV1-18 PE=3 SV=1	IGHV1-18	37	9	177	2	12.8	9.96232e+07	2.82758e+06	1.48705e+06	9.14424e+07	1.17362e+08	7.66143e+07	1.26355e+08	5.59083e+06	2.49968e+06	9.95596e+06	1.33446e+07	8.21768e+07	1.797	0.101	0.044	2.726	3.858	1.142	3.126	0.173	0.07	0.213	0.412	1.441	1.082	0.444387
A0A075B6K0	Immunoglobulin lambda variable 3-16 OS=Homo sapiens OX=9606 GN=IGLV3-16 PE=3 SV=2	IGLV3-16	25	5	36	1	12.5	2.78781e+06	4.61611e+06	6.96366e+06	127583	1.08085e+06	5.41608e+06	2.43974e+06	892343	7.08017e+06	5.71813e+06	5.06058e+06	3.90213e+06
P07476	Involucrin OS=Homo sapiens OX=9606 GN=IVL PE=1 SV=2	IVL	15	7	7	7	68.4		14476.3	12787.6	193754	12036.8		6387.82			6.87871e+06				0.023	0.017	0.255	0.017		0.007			6.497			25.478
Q8WWA0	Intelectin-1 OS=Homo sapiens OX=9606 GN=ITLN1 PE=1 SV=1	ITLN1	31	10	47	6	34.9	4.25373e+07	1.46629e+07	1.278e+07	1.76873e+07	2.04148e+07	3.92694e+07	3.92198e+07	1.14561e+07	1.06796e+07	1.35969e+07	6.90987e+06	6.33346e+07	1.65	1.123	0.805	1.134	1.444	1.259	2.087	0.765	0.642	0.625	0.458	2.388	0.918	0.380503
Q9H8L6	Multimerin-2 OS=Homo sapiens OX=9606 GN=MMRN2 PE=1 SV=2	MMRN2	5	4	20	4	104.3	2.63117e+08	2.32296e+08	3.03668e+08	4.23079e+08	3.20544e+08	4.95774e+08	3.59988e+08	3.09608e+08	2.46034e+08	3.30989e+08	2.42226e+08	3.79788e+08	0.764	1.333	1.431	2.031	1.697	1.19	1.435	1.547	1.108	1.139	1.203	1.072	0.997	0.649712
A0A087WSY6	Immunoglobulin kappa variable 3D-15 OS=Homo sapiens OX=9606 GN=IGKV3D-15 PE=3 SV=6	IGKV3D-15	42	14	381	10	12.5	1.92851e+08	8.17415e+07	5.89977e+07	7.9517e+07	1.58914e+08	3.21743e+08	2.11089e+08	8.56902e+07	7.24951e+07	1.12742e+08	1.45124e+08	2.2458e+08	1.254	1.05	0.623	0.855	1.883	1.729	1.883	0.958	0.731	0.868	1.614	1.419	1.047	0.814307
P49257	Protein ERGIC-53 OS=Homo sapiens OX=9606 GN=LMAN1 PE=1 SV=2	LMAN1	23	9	18	9	57.5	729680				593340	3.47507e+07					353192	2.29799e+07	0.058				0.086	2.286					0.048	1.778	0.668	0.240953
Q9NWV4	CXXC motif containing zinc binding protein OS=Homo sapiens OX=9606 GN=CZIB PE=1 SV=1	CZIB	16	2	20	2	18	2.68102e+06	1.57189e+06	4.54715e+06	4.96066e+06	2.95769e+06	1.1636e+07	4.33862e+06	3.4341e+06	1.77052e+06	2.70694e+06	2.14525e+06	8.65089e+06	0.592	0.685	1.629	1.81	1.19	2.123	1.314	1.304	0.606	0.708	0.81	1.857	1.074	0.613598
Q16555	Dihydropyrimidinase-related protein 2 OS=Homo sapiens OX=9606 GN=DPYSL2 PE=1 SV=1	DPYSL2	5	2	2	2	62.3	5.22081e+06					5.70781e+06						2.88385e+06	1.073					0.969						0.576	0.594
Q96BQ1	Protein FAM3D OS=Homo sapiens OX=9606 GN=FAM3D PE=1 SV=1	FAM3D	9	2	4	2	24.9	561645	3.99557e+06	4.42068e+06	3.24577e+06	1.26323e+06	4.67446e+06	3.24356e+06	3.91296e+06	6.02818e+06	2.94665e+06	1.99244e+06	5.82321e+06	0.151	2.127	1.934	1.446	0.621	1.041	1.199	1.814	2.519	0.941	0.918	1.526	2.282	0.291629
P38117	Electron transfer flavoprotein subunit beta OS=Homo sapiens OX=9606 GN=ETFB PE=1 SV=3	ETFB	19	5	5	5	27.8	4.00086e+06					192386				189921			2.59					0.103				0.146
Q9Y6R7	IgGFc-binding protein OS=Homo sapiens OX=9606 GN=FCGBP PE=1 SV=3	FCGBP	6	15	35	15	571.6	1.33984e+07	8.14045e+06	7.03618e+06	8.13469e+06	1.09275e+07	2.40862e+07	1.78859e+07	1.05856e+07	1.56707e+07	2.87022e+07	1.06492e+07	1.15056e+07	0.912	1.094	0.777	0.915	1.356	1.355	1.67	1.24	1.654	2.315	1.24	0.761	1.517	0.268799
P02671	Fibrinogen alpha chain OS=Homo sapiens OX=9606 GN=FGA PE=1 SV=2	FGA	56	74	1211	73	94.9	1.65741e+09	3.66488e+08	9.11901e+08	7.07309e+08	5.04938e+09	5.72213e+09	8.63079e+08	4.49432e+08	2.69638e+09	9.92722e+08	3.84411e+09	4.63185e+09	0.674	0.295	0.602	0.476	3.745	1.924	0.482	0.315	1.701	0.479	2.675	1.832	1.214	0.76633
P56159	GDNF family receptor alpha-1 OS=Homo sapiens OX=9606 GN=GFRA1 PE=1 SV=2	GFRA1	3	1	2	1	51.4		430143		585954		996472	522523	407914	227736		601836	731502
P19652	Alpha-1-acid glycoprotein 2 OS=Homo sapiens OX=9606 GN=ORM2 PE=1 SV=2	ORM2	44	8	115	4	23.6	1.37541e+07	8.99364e+06	9.43739e+06	9.83531e+06	8.71201e+06	6.92628e+06	1.76609e+07	1.08908e+07	8.28632e+06	2.16091e+07	4.94237e+06	1.32839e+07	1.162	1.501	1.294	1.373	1.342	0.484	2.047	1.583	1.085	2.163	0.714	1.091	1.336	0.44676
Q04917	14-3-3 protein eta OS=Homo sapiens OX=9606 GN=YWHAH PE=1 SV=4	YWHAH	20	6	35	1	28.2	1.57062e+06
P22223	Cadherin-3 OS=Homo sapiens OX=9606 GN=CDH3 PE=1 SV=2	CDH3	3	2	7	2	91.4	9.78565e+06	5.63771e+06	8.00314e+06	2.38654e+06	5.5028e+06	2.23113e+07	6.86368e+06	5.52893e+06	5.59864e+06	3.86173e+06	5.05129e+06	1.94659e+07	1.111	1.264	1.474	0.448	1.138	2.093	1.069	1.08	0.985	0.519	0.98	2.148	0.922	0.268553
Q7Z4R8	UPF0669 protein C6orf120 OS=Homo sapiens OX=9606 GN=C6orf120 PE=1 SV=1	C6orf120	14	1	2	1	20.8						1.22035e+06
Q9Y281	Cofilin-2 OS=Homo sapiens OX=9606 GN=CFL2 PE=1 SV=1	CFL2	21	4	13	1	18.7	61237.9			98020.9		516092						741304
P59665	Neutrophil defensin 1 OS=Homo sapiens OX=9606 GN=DEFA1 PE=1 SV=1	DEFA1	19	3	26	3	10.2	2.4902e+08	5.27922e+07	9.63428e+07	2.52538e+07	2.63641e+07	1.28572e+08	5.38769e+07	6.28457e+07	2.65125e+08	4.73085e+08	2.80123e+07	1.58482e+08	1.745	0.731	1.095	0.292	0.337	0.744	0.518	0.758	2.88	3.927	0.336	1.079	3.31	0.415431
Q9BTY2	Plasma alpha-L-fucosidase OS=Homo sapiens OX=9606 GN=FUCA2 PE=1 SV=2	FUCA2	16	8	52	8	54	1.0644e+07	8.43842e+06	1.26996e+07	2.37695e+07	1.9669e+06	1.11239e+07	6.35481e+06	9.00496e+06	1.01516e+07	3.94045e+06	4.35119e+06	5.72152e+06	1.117	1.749	2.162	4.122	0.376	0.965	0.915	1.625	1.651	0.49	0.781	0.584	0.886	0.338444
O75223	Gamma-glutamylcyclotransferase OS=Homo sapiens OX=9606 GN=GGCT PE=1 SV=1	GGCT	23	4	24	4	21	3.38345e+06	2.48786e+06	3.81327e+06	1.22428e+06	1.71709e+06	1.38739e+07	2.86415e+06	1.40462e+06	3.73862e+06	1.90748e+07	1.39401e+06	7.89897e+06	0.611	0.887	1.117	0.365	0.565	2.07	0.709	0.436	1.046	4.079	0.43	1.386	2.532	0.704395
P22352	Glutathione peroxidase 3 OS=Homo sapiens OX=9606 GN=GPX3 PE=1 SV=2	GPX3	31	6	94	6	25.5	2.81417e+08	1.32861e+08	1.1904e+08	1.0622e+08	1.51159e+08	1.48175e+08	2.09987e+08	1.4202e+08	1.42345e+08	1.48885e+08	1.72829e+08	1.1636e+08	1.707	1.591	1.172	1.065	1.671	0.743	1.747	1.482	1.338	1.07	1.792	0.686	1.016	0.707699
P07686	Beta-hexosaminidase subunit beta OS=Homo sapiens OX=9606 GN=HEXB PE=1 SV=3	HEXB	17	9	50	8	63.1	2.50253e+07	4.2699e+06	2.22325e+07	3.66412e+07	1.8643e+06	1.51614e+07	1.41515e+07	1.38552e+07	1.93528e+07	5.31822e+06	8.35276e+06	9.10946e+06	1.62	0.546	2.335	3.92	0.22	0.811	1.257	1.543	1.942	0.408	0.925	0.573	1.575	0.864085
Q14019	Coactosin-like protein OS=Homo sapiens OX=9606 GN=COTL1 PE=1 SV=3	COTL1	55	7	74	7	15.9	7.24303e+07	4.65327e+07	8.08699e+07	2.52016e+07	4.34373e+07	2.77911e+08	5.29678e+07	4.25261e+07	7.74888e+07	2.58168e+07	4.16903e+07	1.76656e+08	0.853	1.082	1.546	0.491	0.933	2.705	0.856	0.862	1.415	0.36	0.84	2.023	0.849	0.0210518
P13639	Elongation factor 2 OS=Homo sapiens OX=9606 GN=EEF2 PE=1 SV=4	EEF2	20	15	22	15	95.3	5.80622e+07	3.15015e+06	587630		4.69811e+06	2.37162e+07	2.21854e+06	623430	1.62677e+06	9.8378e+06	4.02032e+06	1.99747e+07	4.701	0.504	0.077		0.693	1.587	0.246	0.087	0.204	0.943	0.557	1.572	0.934	0.317779
P35555	Fibrillin-1 OS=Homo sapiens OX=9606 GN=FBN1 PE=1 SV=4	FBN1	0	2	4	2	312.1			2.33495e+06		2.29004e+06	3.56227e+06				2.0916e+06		876286			1.606		1.77	1.248				1.05		0.361	0.289
O14672	Disintegrin and metalloproteinase domain-containing protein 10 OS=Homo sapiens OX=9606 GN=ADAM10 PE=1 SV=1	ADAM10	5	3	4	3	84.1						2.78991e+06					354164	1.56212e+06						1.39					0.365	0.916	0.659
P03950	Angiogenin OS=Homo sapiens OX=9606 GN=ANG PE=1 SV=1	ANG	44	6	34	6	16.5	2.17118e+07	2.05049e+07	1.81674e+07	1.92573e+07	3.07667e+07	5.51442e+07	2.33073e+07		3.05833e+07	18235526	2.5837e+07	1.32765e+08	0.57	1.063	0.774	0.836	1.472	1.196	0.839		1.245	0.567	1.16	3.388	1.476	0.379934
Q5VTU8	ATP synthase subunit epsilon-like protein, mitochondrial OS=Homo sapiens OX=9606 GN=ATP5F1EP2 PE=1 SV=1	ATP5F1EP2	16	1	2	1	5.8						2.67686e+06	2.47552e+06			493885
Q15582	Transforming growth factor-beta-induced protein ig-h3 OS=Homo sapiens OX=9606 GN=TGFBI PE=1 SV=1	TGFBI	15	9	57	9	74.6	8.92252e+06	9.13035e+06	6.82542e+06	5.07457e+06	1.13153e+07	1.38456e+07	6.7871e+06	8.63991e+06	5.70057e+06	5.5314e+06	1.0166e+07	2.07794e+07	0.898	1.816	1.115	0.845	2.077	1.152	0.937	1.497	0.89	0.66	1.75	2.034	1.009	0.781175
P01034	Cystatin-C OS=Homo sapiens OX=9606 GN=CST3 PE=1 SV=1	CST3	73	20	1512	20	15.8	3.94782e+09	1.65866e+09	4.41215e+09	6.71599e+08	1.81634e+09	1.7229e+10	3.23476e+09	2.02222e+09	3.2227e+09	1.57052e+09	2.90234e+09	1.61262e+10	0.762	0.632	1.382	0.214	0.639	2.747	0.856	0.671	0.964	0.359	0.958	3.025	1.193	0.317706
P15086	Carboxypeptidase B OS=Homo sapiens OX=9606 GN=CPB1 PE=1 SV=4	CPB1	24	7	16	7	47.3	2.44546e+06				1.8017e+06	1.21994e+07			1.10339e+06			1.51374e+07	0.354				0.475	1.458			0.247			2.129	1.46
Q9UBG3	Cornulin OS=Homo sapiens OX=9606 GN=CRNN PE=1 SV=1	CRNN	72	27	82	27	53.5	5.81657e+06	853549	963770	3.7578e+07	1.75765e+06	4.08101e+06	4.91114e+06	1.00582e+06	1.66029e+06	6.62801e+08	139776	3.82545e+06	0.091	0.026	0.024	0.972	0.05	0.053	0.105	0.027	0.04	12.286	0.004	0.058	2.946	0.848802
Q01469	Fatty acid-binding protein 5 OS=Homo sapiens OX=9606 GN=FABP5 PE=1 SV=3	FABP5	73	15	193	15	15.2	1.24684e+08	4.50399e+07	2.9869e+07	1.70214e+08	2.01544e+07	3.73281e+08	3.80161e+07	3.99806e+07	2.53907e+07	1.10977e+09	1.78316e+07	2.52094e+08	0.63	0.449	0.245	1.421	0.186	1.559	0.263	0.347	0.199	6.643	0.154	1.238	1.383	0.918047
Q9BYJ0	Fibroblast growth factor-binding protein 2 OS=Homo sapiens OX=9606 GN=FGFBP2 PE=1 SV=1	FGFBP2	13	2	3	2	24.6						5.23592e+06						3.30675e+06						0.958						0.712	0.743
P61981	14-3-3 protein gamma OS=Homo sapiens OX=9606 GN=YWHAG PE=1 SV=2	YWHAG	26	7	37	1	28.3	1.37462e+06					711066						329182
P27348	14-3-3 protein theta OS=Homo sapiens OX=9606 GN=YWHAQ PE=1 SV=1	YWHAQ	32	8	36	3	27.7	4.32281e+06	1.07535e+06	2.1141e+06	1.81356e+06	1.71611e+06	2.6286e+06	1.61302e+06	1.31602e+06	2.32706e+06	3.25077e+06	1.50636e+06	1.29245e+06	1.965	0.965	1.559	1.362	1.421	0.987	1.006	1.029	1.639	1.75	1.17	0.571	0.886	0.296726
P02649	Apolipoprotein E OS=Homo sapiens OX=9606 GN=APOE PE=1 SV=1	APOE	60	22	155	22	36.1	2.89862e+07	8.66219e+06	2.83157e+07	9.81855e+06	6.27125e+07	5.03179e+08	1.59178e+07	1.24011e+07	6.6244e+07	2.32534e+07	6.03316e+07	3.78616e+08	0.275	0.162	0.435	0.154	1.083	3.938	0.207	0.202	0.973	0.261	0.977	3.485	1.286	0.36112
P25774	Cathepsin S OS=Homo sapiens OX=9606 GN=CTSS PE=1 SV=3	CTSS	37	9	23	9	37.5	566302	1.13132e+06	1.6263e+06	2.10121e+06		4.69699e+07	2.32205e+06	479620		1.97874e+06	499761	4.04865e+07	0.055	0.215	0.254	0.335		3.74	0.307	0.079		0.226	0.082	3.792	1.909	0.89387
P15085	Carboxypeptidase A1 OS=Homo sapiens OX=9606 GN=CPA1 PE=1 SV=2	CPA1	34	11	38	11	47.1	3.09943e+06	717745	862104	2.60403e+06	1.26899e+07	5.5208e+07	1.02034e+07	1.00048e+06	192449	1.20382e+07	1.47919e+07	4.35032e+07	0.224	0.103	0.101	0.311	1.673	3.3	1.012	0.124	0.022	1.032	1.829	3.059	1.88	0.621681
P0DP23	Calmodulin-1 OS=Homo sapiens OX=9606 GN=CALM1 PE=1 SV=1	CALM1	51	8	13	6	16.8	2.41529e+07	228678			382996	605036	1.42245e+06			401053	897598		5.693	0.106			0.165	0.118	0.46			0.112	0.362		1.137	0.692712
Q9NPY3	Complement component C1q receptor OS=Homo sapiens OX=9606 GN=CD93 PE=1 SV=3	CD93	15	7	55	6	68.5	9.60695e+06	4.33508e+06	4.54309e+06	3.47893e+06	3.79324e+06	3.81958e+07	1.13187e+07	3.17914e+06	2.33905e+06	7.06205e+06	6.51583e+06	2.85077e+07	0.887	0.791	0.681	0.531	0.639	2.915	1.434	0.505	0.335	0.773	1.029	2.56	1.115	0.973283
Q13740	CD166 antigen OS=Homo sapiens OX=9606 GN=ALCAM PE=1 SV=2	ALCAM	17	8	32	8	65.1	1.00901e+07	6.92714e+06	3.77163e+06	7.82261e+06	4.02872e+06	1.34473e+07	5.16919e+06	3.86716e+06	4.2817e+06	8.85204e+06	2.80358e+06	7.12287e+06	1.465	1.986	0.888	1.877	1.066	1.613	1.029	0.966	0.964	1.522	0.696	1.005	0.727	0.0246711
O94760	N(G),N(G)-dimethylarginine dimethylaminohydrolase 1 OS=Homo sapiens OX=9606 GN=DDAH1 PE=1 SV=3	DDAH1	8	2	13	1	31.1	2.57435e+06	2.1484e+06	1.58083e+06	1.38163e+06	3.79816e+06	5.83152e+07	6.82733e+06	2.06296e+06	2.18544e+06	1.97914e+06	4.33632e+06	3.38029e+07
Q15370	Elongin-B OS=Homo sapiens OX=9606 GN=ELOB PE=1 SV=1	ELOB	17	2	3	2	13.1			119209	186094	149649	692701					174242	456461			0.617	0.982	0.87	1.827					0.951	1.416	0.934	0.713949
P04114	Apolipoprotein B-100 OS=Homo sapiens OX=9606 GN=APOB PE=1 SV=2	APOB	29	120	328	119	515.3	9.48625e+07	2.47037e+08	1.47408e+08	1.02654e+08	8.85997e+07	3.58039e+08	1.75814e+08	1.29097e+08	6.24785e+08	1.50972e+08	9.75274e+07	3.07358e+08	0.427	2.194	1.076	0.763	0.726	1.33	1.084	0.999	4.355	0.804	0.75	1.343	1.69	0.427434
Q7L1Q6	Basic leucine zipper and W2 domain-containing protein 1 OS=Homo sapiens OX=9606 GN=BZW1 PE=1 SV=1	BZW1	4	2	2	1	48	1.04242e+06					223464				274830
P15169	Carboxypeptidase N catalytic chain OS=Homo sapiens OX=9606 GN=CPN1 PE=1 SV=1	CPN1	11	5	37	5	52.3	1.13149e+07	7.88233e+06	7.94854e+06	7.99262e+06	2.8814e+06	5.8672e+06	6.50799e+06	7.48135e+06	8.86252e+06	3.09309e+06	5.30872e+06	5.15682e+06	1.599	2.2	1.823	1.867	0.742	0.685	1.262	1.819	1.942	0.518	1.283	0.709	0.954	0.507492
Q15828	Cystatin-M OS=Homo sapiens OX=9606 GN=CST6 PE=1 SV=1	CST6	62	6	401	6	16.5	2.041e+09	1.46205e+09	1.09675e+09	1.14979e+08	4.92669e+08	2.28136e+09	1.48233e+09	1.14081e+09	1.35866e+09	3.182e+08	5.3137e+08	1.89549e+09	1.63	2.305	1.421	0.152	0.717	1.505	1.624	1.567	1.682	0.301	0.725	1.471	1.138	0.621305
Q01780	Exosome component 10 OS=Homo sapiens OX=9606 GN=EXOSC10 PE=1 SV=2	EXOSC10	1	1	2	1	100.8	455759						245374
Q96HE7	ERO1-like protein alpha OS=Homo sapiens OX=9606 GN=ERO1A PE=1 SV=2	ERO1A	25	9	14	9	54.4	2.1138e+06		1.80427e+06	744270	2.27212e+06	1.045e+06	2.80996e+06	1.21606e+06		2.12536e+07	2.42768e+06		0.504		0.698	0.293	0.988	0.206	0.919	0.499		6.006	0.99		7.775	0.32074
Q6ZVX7	F-box only protein 50 OS=Homo sapiens OX=9606 GN=NCCRP1 PE=1 SV=1	NCCRP1	18	4	4	4	30.8		331008					1.06387e+06			7913997		472505		0.253					0.564			3.626		0.178
P55899	IgG receptor FcRn large subunit p51 OS=Homo sapiens OX=9606 GN=FCGRT PE=1 SV=1	FCGRT	2	1	10	1	39.7	313629	296957	872910	175091	399201	1.55138e+06	409910	237715	817591	376556	335943	981650
Q8IX05	CD302 antigen OS=Homo sapiens OX=9606 GN=CD302 PE=1 SV=1	CD302	3	1	1	1	26.2						1.46528e+06						876608
P02461	Collagen alpha-1(III) chain OS=Homo sapiens OX=9606 GN=COL3A1 PE=1 SV=4	COL3A1	1	1	2	1	138.5						884221
P04632	Calpain small subunit 1 OS=Homo sapiens OX=9606 GN=CAPNS1 PE=1 SV=1	CAPNS1	14	3	3	3	28.3					800243					6753276							0.365					2.004
Q9NZN4	EH domain-containing protein 2 OS=Homo sapiens OX=9606 GN=EHD2 PE=1 SV=2	EHD2	4	2	4	2	61.1	408637				203841	2.14488e+06						966881	0.415				0.377	1.8						0.955	0.531
O95831	Apoptosis-inducing factor 1, mitochondrial OS=Homo sapiens OX=9606 GN=AIFM1 PE=1 SV=1	AIFM1	1	1	1	1	66.9	688953		155641		134072	3.18245e+06		127522			157777	2.69875e+06
P05141	ADP/ATP translocase 2 OS=Homo sapiens OX=9606 GN=SLC25A5 PE=1 SV=7	SLC25A5	17	5	8	5	32.8	1.62132e+07	2.36531e+06		130022	738730	2.79048e+06			519668	385532	472825	2.10631e+06	5.366	1.546		0.071	0.446	0.763			0.267	0.151	0.268	0.678	1.205	0.920031
Q53RT3	Retroviral-like aspartic protease 1 OS=Homo sapiens OX=9606 GN=ASPRV1 PE=1 SV=1	ASPRV1	7	2	3	2	37	6.04424e+06	8.63889e+06	7.82464e+06	6.05415e+06	4.36027e+06	2.43232e+06	4.81201e+06	9.02213e+06	8.29403e+06	7.4845e+06	6.24194e+06	3.30007e+06	0.921	2.599	1.934	1.524	1.211	0.306	1.006	2.364	1.959	1.351	1.626	0.489	1.14	0.303873
P08133	Annexin A6 OS=Homo sapiens OX=9606 GN=ANXA6 PE=1 SV=3	ANXA6	3	1	1	1	75.8
Q92484	Acid sphingomyelinase-like phosphodiesterase 3a OS=Homo sapiens OX=9606 GN=SMPDL3A PE=1 SV=2	SMPDL3A	3	2	2	2	51.2	1.56787e+06	1.18661e+06	1.3742e+06	2.6863e+06			5.25936e+06	1.67601e+06		1.11832e+06	339347		0.78	1.166	1.109	2.209			3.59	1.434		0.659	0.289		2.044	0.845563
Q6PL18	ATPase family AAA domain-containing protein 2 OS=Homo sapiens OX=9606 GN=ATAD2 PE=1 SV=1	ATAD2	1	1	1	1	158.5	7.57529e+06				5.3086e+06	6.41224e+06	7.78177e+06			9516600		7.77286e+06
P07711	Procathepsin L OS=Homo sapiens OX=9606 GN=CTSL PE=1 SV=2	CTSL	28	7	35	7	37.5	2.89707e+06	4.54641e+06	9.9719e+06	1.09991e+07	2.66956e+06	5.52326e+07	6.96861e+06	7.45315e+06	9.00356e+06	1.21343e+07	2.87428e+06	3.70137e+07	0.203	0.63	1.135	1.276	0.341	3.202	0.671	0.9	0.979	1.009	0.345	2.524	1.365	0.518895
P04040	Catalase OS=Homo sapiens OX=9606 GN=CAT PE=1 SV=3	CAT	32	13	50	13	59.7	2.04725e+07	1.05659e+07	2.19416e+07	4.64141e+06	2.50893e+07	2.75124e+07	2.50722e+07	1.08445e+07	2.55602e+07	2.02252e+07	1.62036e+07	1.75218e+07	1.03	1.05	1.791	0.386	2.3	1.144	1.73	0.938	1.993	1.205	1.394	0.857	1.36	0.583187
P00450	Ceruloplasmin OS=Homo sapiens OX=9606 GN=CP PE=1 SV=1	CP	73	96	3136	86	122.1	8.11687e+09	3.47944e+09	3.98056e+09	4.78639e+09	4.16783e+09	3.01358e+09	8.69631e+09	4.945e+09	4.24267e+09	4.55366e+09	3.09328e+09	3.22183e+09	1.637	1.385	1.302	1.595	1.532	0.502	2.405	1.715	1.326	1.088	1.066	0.631	1.06	0.904256
Q5ZPR3	CD276 antigen OS=Homo sapiens OX=9606 GN=CD276 PE=1 SV=1	CD276	9	2	2	2	57.2
Q9HCU0	Endosialin OS=Homo sapiens OX=9606 GN=CD248 PE=1 SV=1	CD248	14	8	82	8	80.8	1.75551e+07	2.20115e+07	2.12698e+07	5.07564e+07	1.41764e+07	5.12323e+07	9.14446e+06	2.76229e+07	1.61454e+07	6.0141e+07	1.16197e+07	3.10841e+07	0.599	1.483	1.177	2.861	0.881	1.444	0.428	1.621	0.854	2.43	0.678	1.031	0.811	0.0221607
P39060	Collagen alpha-1(XVIII) chain OS=Homo sapiens OX=9606 GN=COL18A1 PE=1 SV=5	COL18A1	12	17	162	17	178.1	6.28952e+07	3.95598e+07	8.5845e+07	2.23421e+07	5.31295e+07	3.88032e+08	8.1483e+07	6.1318e+07	5.17986e+07	7.52367e+07	5.777e+07	5.8008e+08	0.458	0.569	1.014	0.269	0.705	2.334	0.814	0.768	0.584	0.649	0.719	4.104	1.482	0.209725
P02675	Fibrinogen beta chain OS=Homo sapiens OX=9606 GN=FGB PE=1 SV=2	FGB	73	44	942	44	55.9	3.97852e+08	1.29716e+08	4.85184e+08	3.89157e+08	2.88614e+09	4.50818e+08	3.3286e+08	1.74777e+08	2.64819e+09	6.59265e+08	2.31066e+09	5.0235e+08	0.397	0.256	0.786	0.642	5.253	0.372	0.456	0.3	4.099	0.78	3.945	0.488	1.802	0.248126
P02763	Alpha-1-acid glycoprotein 1 OS=Homo sapiens OX=9606 GN=ORM1 PE=1 SV=1	ORM1	43	14	130	10	23.5	2.45603e+08	9.51565e+07	1.70652e+08	1.53619e+08	2.15689e+08	1.75251e+08	1.60543e+08	1.17105e+08	1.68317e+08	2.31961e+08	9.37022e+07	2.12185e+08	1.367	1.046	1.541	1.413	2.187	0.806	1.225	1.121	1.452	1.529	0.891	1.148	0.971	0.610766
P08697	Alpha-2-antiplasmin OS=Homo sapiens OX=9606 GN=SERPINF2 PE=1 SV=3	SERPINF2	55	24	391	24	54.5	3.17835e+08	3.22314e+08	5.59483e+08	5.00925e+08	8.22773e+08	5.63439e+08	5.8674e+08	2.09158e+08	2.35261e+08	5.39398e+08	9.02477e+08	7.0361e+08	0.576	1.153	1.645	1.5	2.718	0.844	1.459	0.652	0.661	1.158	2.796	1.239	1.128	0.816135
Q12904	Aminoacyl tRNA synthase complex-interacting multifunctional protein 1 OS=Homo sapiens OX=9606 GN=AIMP1 PE=1 SV=2	AIMP1	13	3	3	3	34.3	828511				219004							176692	1.92				0.925							0.398
O15204	ADAM DEC1 OS=Homo sapiens OX=9606 GN=ADAMDEC1 PE=1 SV=2	ADAMDEC1	9	3	5	3	52.7						6.48845e+06					367989	1.39929e+06						1.843					0.216	0.467	0.253
Q9Y646	Carboxypeptidase Q OS=Homo sapiens OX=9606 GN=CPQ PE=1 SV=1	CPQ	31	10	47	10	51.9	1.05071e+07	4.70372e+06	7.61568e+06	3.60954e+07	2.63981e+06	1.51794e+07	7.44626e+06	1.13989e+07	7.3231e+06	6.9176e+06	2.83918e+06	6.39041e+06	1.002	0.886	1.178	5.687	0.459	1.196	0.974	1.869	1.082	0.781	0.463	0.592	0.94	0.40902
Q9BYE9	Cadherin-related family member 2 OS=Homo sapiens OX=9606 GN=CDHR2 PE=1 SV=2	CDHR2	1	1	3	1	141.5	444214	679673	476738	791669	242140	501677	258271	431020	434796	647844	235280	149577
Q6E0U4	Dermokine OS=Homo sapiens OX=9606 GN=DMKN PE=1 SV=3	DMKN	3	1	1	1	47.1	5.1091e+06	1.60257e+06	1.24098e+07	3.69002e+06	637768	1.1793e+06	9.80181e+06	1.01671e+07	749420	14193261		770442
P26885	Peptidyl-prolyl cis-trans isomerase FKBP2 OS=Homo sapiens OX=9606 GN=FKBP2 PE=1 SV=2	FKBP2	8	1	2	1	15.6												5.49449e+06
P06396	Gelsolin OS=Homo sapiens OX=9606 GN=GSN PE=1 SV=1	GSN	53	57	691	57	85.6	2.55464e+08	2.66557e+08	2.04179e+08	5.59779e+08	1.02057e+09	1.16233e+09	3.39412e+08	2.49276e+08	2.06273e+08	8.52927e+08	1.30261e+09	1.4515e+09	0.368	0.759	0.478	1.334	2.682	1.385	0.671	0.618	0.461	1.457	3.212	2.035	1.227	0.21413
Q08211	ATP-dependent RNA helicase A OS=Homo sapiens OX=9606 GN=DHX9 PE=1 SV=4	DHX9	4	4	4	4	140.9	3.23525e+07	2.7411e+07	3.42244e+06	1.96836e+07	2.13213e+07	3.80762e+07	2.03555e+07	2.26472e+07	3.43299e+06	1.71935e+07	2.06112e+07	3.4282e+07	1.408	2.356	0.242	1.416	1.691	1.369	1.215	1.696	0.232	0.886	1.534	1.45	0.856	0.0831346
O75636	Ficolin-3 OS=Homo sapiens OX=9606 GN=FCN3 PE=1 SV=2	FCN3	10	2	11	2	32.9	318784	71313.6	340522	324218	448125	1.97126e+06	1.17689e+06	231621	1.25671e+06	332182	996489	1.66377e+06	0.396	0.175	0.687	0.666	1.015	2.025	2.007	0.495	2.422	0.489	2.118	2.01	2.539	0.0639599
P09917	Polyunsaturated fatty acid 5-lipoxygenase OS=Homo sapiens OX=9606 GN=ALOX5 PE=1 SV=2	ALOX5	1	1	3	1	77.9	4.4973e+06					6.29883e+06	4.84506e+06					3.49591e+06
Q03252	Lamin-B2 OS=Homo sapiens OX=9606 GN=LMNB2 PE=1 SV=4	LMNB2	5	3	3	2	69.9	1.03008e+07		1.05312e+07			914989							1.344		2.23			0.099
P02654	Apolipoprotein C-I OS=Homo sapiens OX=9606 GN=APOC1 PE=1 SV=1	APOC1	36	5	47	5	9.3	1.81197e+07	1.29784e+07	4.24601e+07	3.06668e+07	1.33845e+08	1.21155e+08	3.56854e+07	1.25848e+07	8.3668e+07	55109729	2.58206e+08	1.11982e+08	0.224	0.317	0.853	0.628	3.021	1.24	0.606	0.268	1.606	0.809	5.468	1.348	1.603	0.0686722
Q07021	Complement component 1 Q subcomponent-binding protein, mitochondrial OS=Homo sapiens OX=9606 GN=C1QBP PE=1 SV=1	C1QBP	5	1	1	1	31.3	5.20363e+06	1.68837e+06							4.15334e+06
Q9Y696	Chloride intracellular channel protein 4 OS=Homo sapiens OX=9606 GN=CLIC4 PE=1 SV=4	CLIC4	15	4	13	4	28.8	8.63231e+06	1.00034e+07	4.86415e+06	8.95194e+06	4.09576e+06	1.18044e+07	7.83606e+06	1.20642e+07	9.08736e+06	1.20019e+07	1.55465e+07	1.19622e+07	0.839	1.919	0.767	1.437	0.725	0.947	1.044	2.016	1.368	1.381	2.582	1.129	1.632	0.117492
P54652	Heat shock-related 70 kDa protein 2 OS=Homo sapiens OX=9606 GN=HSPA2 PE=1 SV=1	HSPA2	11	7	20	1	70						912146						924077
P19013	Keratin, type II cytoskeletal 4 OS=Homo sapiens OX=9606 GN=KRT4 PE=1 SV=5	KRT4	70	47	118	36	56.1	6.82187e+06	1.28055e+07	1.14836e+07	1.69875e+07	5.37682e+06	3.12617e+06	2.58909e+06	7.1555e+06	3.81999e+07	1.40505e+09	3.33614e+06	9.56866e+06	0.051	0.189	0.139	0.209	0.073	0.019	0.026	0.092	0.441	12.408	0.043	0.069	11.293	0.359699
O14793	Growth/differentiation factor 8 OS=Homo sapiens OX=9606 GN=MSTN PE=1 SV=1	MSTN	12	2	2	2	42.7						532541						703312						0.674						1.046	1.552
P21695	Glycerol-3-phosphate dehydrogenase [NAD(+)], cytoplasmic OS=Homo sapiens OX=9606 GN=GPD1 PE=1 SV=4	GPD1	3	1	2	1	37.5		155919		438037		87164.9			493896
P69891	Hemoglobin subunit gamma-1 OS=Homo sapiens OX=9606 GN=HBG1 PE=1 SV=2	HBG1	50	8	44	6	16.1		1.02184e+06	1.43447e+07	819955	1.67614e+06	2.13299e+06	1.06071e+06		1.96801e+07	765698	2.57181e+06	1.41329e+06		0.42	4.84	0.282	0.635	0.366	0.303		6.344	0.189	0.914	0.286	1.05	0.988306
Q8IUE6	Histone H2A type 2-B OS=Homo sapiens OX=9606 GN=H2AC21 PE=1 SV=3	H2AC21	32	5	39	1	14	2.11969e+06								86244.7	1.45276e+06
P0DOY3	Immunoglobulin lambda constant 3 OS=Homo sapiens OX=9606 GN=IGLC3 PE=1 SV=1	IGLC3	96	37	3296	6	11.3	1.50297e+10	1.12794e+10	8.01168e+09	8.61823e+09	1.13072e+10	2.3429e+10	1.27478e+10	9.37141e+09	7.69091e+09	1.02401e+10	1.06667e+10	1.9908e+10	1.15	1.705	0.995	1.09	1.577	1.482	1.338	1.234	0.913	0.928	1.396	1.481	0.923	0.22376
O43432	Eukaryotic translation initiation factor 4 gamma 3 OS=Homo sapiens OX=9606 GN=EIF4G3 PE=1 SV=2	EIF4G3	2	3	31	3	176.5	1.24035e+07	3.11232e+06	1.19167e+07	6.65588e+06	5.34011e+06	3.69056e+06	1.07505e+07	7.22225e+06	1.35316e+07	7.33138e+06	9.47427e+06	3.66179e+06	1.481	0.734	2.308	1.313	1.162	0.364	1.76	1.483	2.504	1.037	1.934	0.425	1.319	0.148824
P00995	Serine protease inhibitor Kazal-type 1 OS=Homo sapiens OX=9606 GN=SPINK1 PE=1 SV=2	SPINK1	10	1	4	1	8.5	2.0671e+06				840554	1.26764e+06	819058		166202			1.02049e+06
P02533	Keratin, type I cytoskeletal 14 OS=Homo sapiens OX=9606 GN=KRT14 PE=1 SV=4	KRT14	31	15	107	4	51.5	731527	1.07287e+06	111179	804210		442700		1.09999e+06	3.20745e+06	6.90796e+06		490391	0.419	1.213	0.103	0.761		0.209		1.083	2.847	4.685		0.273	8.999	0.190884
Q9Y624	Junctional adhesion molecule A OS=Homo sapiens OX=9606 GN=F11R PE=1 SV=1	F11R	32	9	91	9	32.6	8.94668e+07	2.54112e+07	3.32873e+07	1.10803e+07	2.27626e+07	1.34784e+08	2.34548e+07	1.26768e+07	3.24861e+07	2.04222e+07	1.9105e+07	1.0003e+08	1.934	1.085	1.168	0.396	0.897	2.408	0.696	0.471	1.089	0.523	0.706	2.102	0.785	0.154781
P14618	Pyruvate kinase PKM OS=Homo sapiens OX=9606 GN=PKM PE=1 SV=4	PKM	39	17	67	17	57.9	6.12402e+07	6.41807e+06	1.86341e+07	9.35589e+06	9.85307e+06	4.90156e+07	9.52283e+06	5.48825e+06	3.26916e+07	3.38912e+07	1.05355e+07	3.8172e+07	2.441	0.505	1.205	0.616	0.716	1.614	0.521	0.376	2.02	1.6	0.718	1.479	1.192	0.836677
Q92876	Kallikrein-6 OS=Homo sapiens OX=9606 GN=KLK6 PE=1 SV=1	KLK6	30	5	20	5	26.8	346107	186738	254851			2.20268e+07	910983	162640	2.21157e+06	8.25648e+06		2.16275e+07	0.053	0.056	0.063			2.768	0.19	0.043	0.521	1.487		3.197	3.444	0.227992
A0A087WSZ0	Immunoglobulin kappa variable 1D-8 OS=Homo sapiens OX=9606 GN=IGKV1D-8 PE=3 SV=6	IGKV1D-8	26	10	301	1	12.8						2.23097e+06	4.56862e+06
Q92520	Protein FAM3C OS=Homo sapiens OX=9606 GN=FAM3C PE=1 SV=1	FAM3C	60	14	174	14	24.7	1.81741e+08	2.22878e+08	2.76788e+08	8.28796e+07	1.76803e+08	1.11851e+09	3.19935e+08	1.56671e+08	1.90394e+08	2.02267e+08	2.03782e+08	1.06032e+09	0.492	1.191	1.216	0.371	0.872	2.502	1.188	0.73	0.799	0.649	0.943	2.79	1.272	0.607876
P02765	Alpha-2-HS-glycoprotein OS=Homo sapiens OX=9606 GN=AHSG PE=1 SV=2	AHSG	56	37	1766	37	39.3	4.71611e+09	5.07172e+09	2.6417e+09	3.25472e+09	3.78837e+09	3.73698e+09	6.50202e+09	5.18995e+09	1.85953e+09	5.51701e+09	5.09899e+09	4.53678e+09	1.031	2.19	0.937	1.176	1.51	0.675	1.95	1.952	0.63	1.429	1.906	0.964	1.227	0.353154
Q92945	Far upstream element-binding protein 2 OS=Homo sapiens OX=9606 GN=KHSRP PE=1 SV=4	KHSRP	16	8	9	7	73.1	9.38937e+06	1.16217e+06	1.10012e+06	715865	759830	1.65996e+06	1.02651e+06	758626	1.08321e+06	1.14124e+06	358898	1.05054e+06	5.274	1.289	1.003	0.665	0.778	0.77	0.791	0.733	0.943	0.759	0.345	0.574	0.665	0.106936
Q14789	Golgin subfamily B member 1 OS=Homo sapiens OX=9606 GN=GOLGB1 PE=1 SV=2	GOLGB1	1	3	8	3	375.8		2.91531e+06	4.70331e+06			1.12504e+06	956297	1.79536e+06	7.40188e+06	6291529	5.07618e+06	656645		1.585	2.101			0.256	0.361	0.85	3.159	2.052	2.389	0.176	0.909	0.591427
Q04756	Hepatocyte growth factor activator OS=Homo sapiens OX=9606 GN=HGFAC PE=1 SV=1	HGFAC	17	10	101	10	70.6	1.19399e+07	1.68361e+07	1.53185e+07	1.60993e+07	1.61942e+07	6.91207e+06	1.72517e+07	1.20755e+07	1.34684e+07	1.83779e+07	2.19679e+07	7.59521e+06	0.779	2.168	1.621	1.735	1.925	0.372	1.543	1.355	1.362	1.42	2.45	0.481	1.138	0.753939
Q08380	Galectin-3-binding protein OS=Homo sapiens OX=9606 GN=LGALS3BP PE=1 SV=1	LGALS3BP	37	19	209	19	65.3	6.99586e+07	3.85341e+07	1.09781e+08	1.01407e+08	2.48928e+07	8.83943e+07	4.22963e+07	5.2747e+07	1.46565e+08	8.80692e+07	2.7085e+07	3.45863e+07	0.963	1.048	2.453	2.308	0.625	1.006	0.799	1.249	3.129	1.437	0.638	0.463	0.9	0.351747
P55268	Laminin subunit beta-2 OS=Homo sapiens OX=9606 GN=LAMB2 PE=1 SV=2	LAMB2	0	1	2	1	195.9						758508						853355
P98164	Low-density lipoprotein receptor-related protein 2 OS=Homo sapiens OX=9606 GN=LRP2 PE=1 SV=3	LRP2	5	19	67	19	521.6	2.87576e+07	8.73189e+06	1.35641e+07	1.9903e+07	8.7242e+06	1.3108e+07	5.40168e+06	6.95084e+06	2.08525e+07	1.3333e+07	7.19009e+06	7.59428e+06	2.118	1.27	1.621	2.423	1.171	0.798	0.546	0.881	2.381	1.163	0.905	0.544	0.726	0.111541
P19957	Elafin OS=Homo sapiens OX=9606 GN=PI3 PE=1 SV=3	PI3	29	4	9	4	12.3	1.05717e+06	438187		944218	1.30435e+07	2.43873e+06			8.91148e+06	2.35707e+07	2.84605e+06	1.01454e+06	0.166	0.136		0.245	3.729	0.316			2.167	4.38	0.763	0.155	6.191	0.899771
O15540	Fatty acid-binding protein, brain OS=Homo sapiens OX=9606 GN=FABP7 PE=1 SV=3	FABP7	30	3	21	3	14.9	1.25834e+06	1.59861e+06	1.43575e+06	3.909e+06	1.06821e+06	5.86683e+06	1.48538e+06	1.71726e+06	2.55999e+06	2.84784e+06	162505	3.79993e+06	0.515	1.293	0.954	2.646	0.797	1.986	0.835	1.21	1.626	1.382	0.114	1.513	0.948	0.431747
Q92817	Envoplakin OS=Homo sapiens OX=9606 GN=EVPL PE=1 SV=3	EVPL	17	30	35	30	231.5	1.15103e+07	5.53797e+06	6.91102e+06	3.92159e+06	1.7697e+06	8.27335e+06	4.68697e+06	4.40008e+06	6.36547e+06	3.94144e+07	2.27912e+06	6.01593e+06	1.292	1.228	1.259	0.728	0.362	0.768	0.722	0.85	1.108	5.243	0.438	0.657	1.9	0.698964
P39748	Flap endonuclease 1 OS=Homo sapiens OX=9606 GN=FEN1 PE=1 SV=1	FEN1	2	1	1	1	42.6
Q14697	Neutral alpha-glucosidase AB OS=Homo sapiens OX=9606 GN=GANAB PE=1 SV=3	GANAB	4	4	4	4	106.8	3.19228e+06	1.94536e+06	1.81189e+06	2.06346e+06	655708	521768	912886	1.75193e+06	1.98048e+06	2.1122e+06	1.55662e+06		1.795	2.16	1.653	1.918	0.672	0.242	0.704	1.694	1.726	1.407	1.496		1.036	0.670916
Q96C23	Galactose mutarotase OS=Homo sapiens OX=9606 GN=GALM PE=1 SV=1	GALM	17	4	8	4	37.7	2.1752e+06		976127	485067		1.03199e+07	571507	117972	600370	117935	282228	5.51655e+06	0.972		0.708	0.358		3.811	0.35	0.091	0.416	0.062	0.216	2.397	0.437	0.0505297
Q9BYK8	Helicase with zinc finger domain 2 OS=Homo sapiens OX=9606 GN=HELZ2 PE=1 SV=6	HELZ2	0	1	7	1	294.5	2.71756e+06	156011	185202	185052	345405	1.38572e+06	2.22652e+06	327528	371300	600951	279406	1.62273e+06
Q08623	Pseudouridine-5'-phosphatase OS=Homo sapiens OX=9606 GN=PUDP PE=1 SV=3	PUDP	4	1	1	1	25.2
Q9H8J5	MANSC domain-containing protein 1 OS=Homo sapiens OX=9606 GN=MANSC1 PE=1 SV=1	MANSC1	5	1	1	1	46.8
P01709	Immunoglobulin lambda variable 2-8 OS=Homo sapiens OX=9606 GN=IGLV2-8 PE=1 SV=2	IGLV2-8	39	9	280	2	12.4	1.58814e+08	8.02171e+07	4.48086e+07	7.6783e+07	9.87363e+07	3.07823e+08	1.62401e+08	1.04777e+08	7.01511e+07	7.73603e+07	1.34464e+08	1.72841e+08	1.21	1.207	0.554	0.967	1.372	1.939	1.698	1.374	0.829	0.698	1.752	1.28	1.116	0.679516
A0A0B4J1Y8	Immunoglobulin lambda variable 9-49 OS=Homo sapiens OX=9606 GN=IGLV9-49 PE=1 SV=1	IGLV9-49	16	3	38	3	13	1.8338e+07	1.91701e+07	1.74839e+07	1.08042e+07	1.73356e+07	1.14871e+08	2.06544e+07	1.79874e+07	1.3328e+07	1.81174e+07	2.66882e+07	6.98908e+07	0.571	1.178	0.883	0.556	0.983	2.954	0.882	0.963	0.643	0.668	1.42	2.114	1.075	0.882511
P07948	Tyrosine-protein kinase Lyn OS=Homo sapiens OX=9606 GN=LYN PE=1 SV=3	LYN	3	2	2	1	58.5	836172									278675		656971
A0A075B6S6	Immunoglobulin kappa variable 2D-30 OS=Homo sapiens OX=9606 GN=IGKV2D-30 PE=3 SV=1	IGKV2D-30	40	7	129	3	13.2	1.28405e+07	8.72159e+06	7.78519e+06	1.24727e+07	1.23917e+07	1.63877e+07	1.19873e+07	9.89231e+06	5.42969e+06	2.08744e+07	1.2536e+07	3.24002e+07	0.89	1.194	0.876	1.429	1.566	0.939	1.14	1.18	0.584	1.714	1.486	2.183	1.235	0.466315
P11279	Lysosome-associated membrane glycoprotein 1 OS=Homo sapiens OX=9606 GN=LAMP1 PE=1 SV=3	LAMP1	9	4	9	4	44.9	6.78541e+06	1.71255e+06	2.29011e+06		1.55589e+06	5.95506e+06	2.03354e+06	2.16464e+06	5.32296e+06	2.29943e+06	2.43352e+06	2.46633e+06	2.016	1.005	1.104		0.843	1.462	0.829	1.106	2.452	0.809	1.236	0.712	1.137	0.846961
P16233	Pancreatic triacylglycerol lipase OS=Homo sapiens OX=9606 GN=PNLIP PE=1 SV=1	PNLIP	15	9	20	8	51.1	131772	7254.25		109735	818892	3.20999e+07	1.25069e+06			1.93028e+06	851346	3.08419e+07	0.016	0.002		0.023	0.187	3.318	0.215			0.286	0.182	3.751	6.994	0.170373
P33908	Mannosyl-oligosaccharide 1,2-alpha-mannosidase IA OS=Homo sapiens OX=9606 GN=MAN1A1 PE=1 SV=3	MAN1A1	11	6	18	6	72.9	2.1371e+06	721398	2.96219e+06	3.02976e+06	4.76691e+06	7.90854e+06	1.49472e+06	1.23216e+06	1.91188e+06	3.16954e+06	2.91873e+06	6.29328e+06	0.629	0.419	1.415	1.474	2.558	1.924	0.604	0.624	0.873	1.106	1.469	1.801	0.888	0.281246
Q8WZA0	Protein LZIC OS=Homo sapiens OX=9606 GN=LZIC PE=1 SV=1	LZIC	4	1	2	1	21.5	915941					2.26371e+06
O00754	Lysosomal alpha-mannosidase OS=Homo sapiens OX=9606 GN=MAN2B1 PE=1 SV=3	MAN2B1	8	6	11	6	113.7	1.87314e+06	1.72662e+06	3.3044e+06	4.6008e+06	1.14559e+06	2.50055e+06	1.89536e+06	1.71706e+06	2.23833e+06	1.54727e+06	2.31771e+06	1.19988e+06	0.816	1.485	2.335	3.311	0.909	0.9	1.132	1.286	1.511	0.798	1.726	0.508	0.934	0.409298
A0A075B6I9	Immunoglobulin lambda variable 7-46 OS=Homo sapiens OX=9606 GN=IGLV7-46 PE=3 SV=4	IGLV7-46	23	4	112	1	12.5	1.29723e+08	2.01236e+08	9.67091e+07	1.7521e+08	2.30681e+08	4.50401e+08	1.20487e+08	1.91843e+08	1.16038e+08	1.96822e+08	2.11789e+08	3.15976e+08
P10253	Lysosomal alpha-glucosidase OS=Homo sapiens OX=9606 GN=GAA PE=1 SV=4	GAA	25	20	108	20	105.3	5.13157e+07	1.82855e+07	3.41678e+07	7.21836e+07	1.1847e+07	2.87426e+07	1.81937e+07	3.34267e+07	6.21515e+07	3.14573e+07	1.11306e+07	9.60631e+06	1.523	1.071	1.645	3.54	0.641	0.705	0.741	1.706	2.859	1.106	0.565	0.277	0.901	0.33071
P12724	Eosinophil cationic protein OS=Homo sapiens OX=9606 GN=RNASE3 PE=1 SV=2	RNASE3	10	2	3	2	18.4	451605	52981.1	442465	383004	394128			1.09893e+06	88251.6	1.60784e+06	1.8289e+06	2.09709e+06	0.506	0.117	0.804	0.709	0.805			2.117	0.153	2.133	3.502	2.283	6.411	0.391199
P02042	Hemoglobin subunit delta OS=Homo sapiens OX=9606 GN=HBD PE=1 SV=2	HBD	70	18	231	5	16	1.238e+07	7.41937e+06	1.08019e+08	190259		3.09751e+06	9.29434e+06	4.46901e+06	7.92326e+07	2.03803e+06	785475	2.0365e+06	0.563	0.666	7.965	0.014		0.116	0.579	0.349	5.582	0.11	0.061	0.09	2.177	0.748627
Q92522	Histone H1.10 OS=Homo sapiens OX=9606 GN=H1-10 PE=1 SV=1	H1-10	5	1	1	1	22.5
A0A0A0MT89	Immunoglobulin kappa joining 1 OS=Homo sapiens OX=9606 GN=IGKJ1 PE=4 SV=2	IGKJ1	67	1	24	1	1.4	2.07453e+07	1.18987e+07	5.41063e+06	1.26102e+07	9.36348e+06	2.52627e+07	2.42377e+07	1.15611e+07	7.34811e+06	16621898	1.07256e+07	2.06816e+07
P04180	Phosphatidylcholine-sterol acyltransferase OS=Homo sapiens OX=9606 GN=LCAT PE=1 SV=1	LCAT	27	8	58	8	49.5	1.16428e+07	1.6025e+07	1.95884e+07	1.99341e+07	1.2586e+07	7.49093e+06	1.35285e+07	2.58949e+07	1.48846e+07	2.68631e+07	1.22612e+07	7.35635e+06	0.703	1.91	1.918	1.988	1.385	0.374	1.12	2.688	1.393	1.921	1.265	0.432	1.127	0.508773
P02775	Platelet basic protein OS=Homo sapiens OX=9606 GN=PPBP PE=1 SV=3	PPBP	19	3	5	3	13.9	3.0887e+06	1.14e+06	3.21197e+06	3.12464e+06	2.97328e+07	7.03146e+06	2.99953e+06	2.88501e+06	1.18481e+07	3646071	1.86001e+07	1.46434e+07	0.344	0.251	0.58	0.575	6.033	0.647	0.458	0.552	2.045	0.481	3.541	1.585	1.822	0.194026
P17538	Chymotrypsinogen B OS=Homo sapiens OX=9606 GN=CTRB1 PE=2 SV=2	CTRB1	13	2	4	2	27.7
P78347	General transcription factor II-I OS=Homo sapiens OX=9606 GN=GTF2I PE=1 SV=2	GTF2I	2	2	3	2	112.3	1.30959e+06	234329	344364			982466	917012			970747		188301	1.753	0.619	0.748			1.087	1.684			1.539		0.245	0.593	0.482846
P06870	Kallikrein-1 OS=Homo sapiens OX=9606 GN=KLK1 PE=1 SV=2	KLK1	10	2	6	2	28.9	663128	373842		4.84901e+06				246916		3.71971e+06			0.318	0.354		3.847				0.204		2.115			0.563	0.0260513
P01599	Immunoglobulin kappa variable 1-17 OS=Homo sapiens OX=9606 GN=IGKV1-17 PE=1 SV=2	IGKV1-17	38	14	397	1	12.8						1.98329e+06						1.99328e+06
P33241	Lymphocyte-specific protein 1 OS=Homo sapiens OX=9606 GN=LSP1 PE=1 SV=1	LSP1	7	2	9	2	37.2	1.50344e+06	714292	447762	573801	423024		171490	654828	553783	365528	407099	196524	2.602	2.441	1.257	1.641	1.334		0.407	1.95	1.486	0.749	1.205	0.331	0.699	0.194127
P08263	Glutathione S-transferase A1 OS=Homo sapiens OX=9606 GN=GSTA1 PE=1 SV=3	GSTA1	7	2	7	2	25.6	1.53582e+06		3.82804e+06	3.18553e+06	1.18944e+06	4.04984e+06	1.71439e+06	1.24955e+06	5.94867e+06	6173626	747578	1.90279e+06	0.507		2.05	1.738	0.715	1.104	0.776	0.709	3.044	2.414	0.422	0.61	1.109	0.981234
O14498	Immunoglobulin superfamily containing leucine-rich repeat protein OS=Homo sapiens OX=9606 GN=ISLR PE=2 SV=1	ISLR	16	6	63	6	46	6.26858e+06	6.35052e+06	1.47701e+07	2.82178e+07	9.32637e+06	4.6683e+07	1.3225e+07	8.63484e+06	5.2344e+06	2.07849e+07	1.04204e+07	2.6676e+07	0.362	0.724	1.384	2.693	0.981	2.227	1.047	0.858	0.469	1.422	1.029	1.497	1.111	0.665436
A0A0B4J2D9	Immunoglobulin kappa variable 1D-13 OS=Homo sapiens OX=9606 GN=IGKV1D-13 PE=3 SV=1	IGKV1D-13	42	12	258	2	12.6	3.29153e+07	2.4465e+07	3.3173e+06	4.61817e+06	1.12613e+07	1.19958e+07	5.76025e+06	3.32325e+07	5.67111e+06	3.08276e+06	8.79751e+06	1.73674e+07	2.299	3.375	0.376	0.533	1.434	0.692	0.552	3.993	0.614	0.255	1.051	1.179	0.995	0.525763
P01717	Immunoglobulin lambda variable 3-25 OS=Homo sapiens OX=9606 GN=IGLV3-25 PE=1 SV=2	IGLV3-25	56	13	123	2	12	1.5556e+08	1.21104e+08	5.99759e+07	4.27478e+07	1.39686e+08	5.21453e+08	1.79241e+08	9.16205e+07	5.84315e+07	7.95699e+07	1.3992e+08	3.41757e+08	0.914	1.406	0.572	0.415	1.496	2.533	1.445	0.926	0.532	0.554	1.406	1.953	1.036	0.938712
A0A0A0MRZ9	Immunoglobulin lambda variable 5-52 OS=Homo sapiens OX=9606 GN=IGLV5-52 PE=3 SV=1	IGLV5-52	19	2	15	2	13.4	5.30517e+06	6.63279e+06	3.93412e+06	2.46692e+06	4.19963e+06	2.06427e+07	4.96722e+06	5.78914e+06	2.64352e+06	4.1562e+06	4.47384e+06	1.74628e+07	0.728	1.798	0.876	0.56	1.051	2.342	0.935	1.367	0.563	0.676	1.05	2.33	0.981	0.681986
P14174	Macrophage migration inhibitory factor OS=Homo sapiens OX=9606 GN=MIF PE=1 SV=4	MIF	17	2	11	2	12.5	1.47223e+07		2.62708e+06			6.90678e+06			5.41987e+06	6018635		8.02442e+06	1.911		0.553			0.741			1.091	0.926		1.012	1.669	0.226212
Q96DZ1	Endoplasmic reticulum lectin 1 OS=Homo sapiens OX=9606 GN=ERLEC1 PE=1 SV=1	ERLEC1	4	1	1	1	54.8
Q14314	Fibroleukin OS=Homo sapiens OX=9606 GN=FGL2 PE=1 SV=1	FGL2	4	2	25	1	50.2												572485
Q5D862	Filaggrin-2 OS=Homo sapiens OX=9606 GN=FLG2 PE=1 SV=1	FLG2	0	1	1	1	247.9									2.42835e+06	3.86154e+06
P98095	Fibulin-2 OS=Homo sapiens OX=9606 GN=FBLN2 PE=1 SV=2	FBLN2	2	2	2	2	126.5	3.57937e+07	2.23787e+07		905222		1.11227e+06		2.25652e+07	7.92929e+06				2.24	2.766		0.094		0.058		2.429	0.769				0.878
P04066	Tissue alpha-L-fucosidase OS=Homo sapiens OX=9606 GN=FUCA1 PE=1 SV=4	FUCA1	29	11	67	11	53.7	1.6309e+07	6.23218e+06	1.7196e+07	4.51607e+07	5.90179e+06	1.27437e+07	1.03843e+07	1.31361e+07	1.86192e+07	4.19808e+06	2.59154e+06	1.06329e+07	1.135	0.856	1.942	5.194	0.749	0.733	0.991	1.572	2.009	0.346	0.308	0.719	0.867	0.329173
Q8N1G4	Leucine-rich repeat-containing protein 47 OS=Homo sapiens OX=9606 GN=LRRC47 PE=1 SV=1	LRRC47	1	1	1	1	63.4	40994.5								21360.8	3534.25
P26038	Moesin OS=Homo sapiens OX=9606 GN=MSN PE=1 SV=3	MSN	21	13	30	10	67.8	1.1374e+07	2.69883e+06	1.78584e+06	3.59331e+06	1.45808e+06	4.75761e+06	1.66074e+06	1.78721e+06	4.29924e+06	9.19864e+06	892393	3.77102e+06	2.731	1.28	0.696	1.426	0.638	0.944	0.547	0.738	1.6	2.616	0.366	0.88	1.069	0.564234
P28799	Progranulin OS=Homo sapiens OX=9606 GN=GRN PE=1 SV=2	GRN	6	3	9	3	63.5	4.2756e+06					7.43039e+06	413363					946438	1.238					1.778	0.164					0.266	0.141	0.0197423
P68871	Hemoglobin subunit beta OS=Homo sapiens OX=9606 GN=HBB PE=1 SV=2	HBB	88	28	381	15	16	1.52732e+09	6.58384e+08	2.61383e+09	2.29996e+08	1.12756e+08	1.39377e+08	9.406e+08	4.06747e+08	2.56397e+09	2.56211e+08	1.2785e+08	1.27047e+08	1.786	1.521	4.961	0.445	0.24	0.135	1.509	0.818	4.649	0.355	0.256	0.144	0.875	0.189079
B2CW77	Killin OS=Homo sapiens OX=9606 GN=KLLN PE=1 SV=1	KLLN	4	1	4	1	19.9	2.64511e+07	5.96541e+07	3.97624e+07	5.34145e+07	2.85305e+07	1.93769e+07	1.92404e+07	5.52281e+07	6.0025e+07	3.56602e+07	1.81687e+07	1.49327e+07
P35908	Keratin, type II cytoskeletal 2 epidermal OS=Homo sapiens OX=9606 GN=KRT2 PE=1 SV=2	KRT2	36	22	122	11	65.4	7.00534e+07	1.49629e+07	7.4244e+06	1.64191e+07	9.27844e+06	2.75804e+07	5.5862e+07	8.87482e+06	6.07365e+06	3.26021e+07	2.48438e+07	2.75015e+07	2.638	1.112	0.454	1.022	0.637	0.858	2.885	0.575	0.354	1.454	1.599	1.006	1.249	0.66037
Q86Y46	Keratin, type II cytoskeletal 73 OS=Homo sapiens OX=9606 GN=KRT73 PE=1 SV=1	KRT73	11	7	10	1	58.9					466009	690575			2.29984e+06	6156954		637909
P56199	Integrin alpha-1 OS=Homo sapiens OX=9606 GN=ITGA1 PE=1 SV=2	ITGA1	1	1	34	1	130.8	2.29134e+07	1.237e+07	3.03409e+06	7.7283e+06	1.03556e+07	1.75518e+07	2.53904e+07	1.33504e+07	6.14902e+06	1.09524e+07	1.1184e+07	2.23001e+07
Q14974	Importin subunit beta-1 OS=Homo sapiens OX=9606 GN=KPNB1 PE=1 SV=2	KPNB1	8	6	7	6	97.1	6.98603e+06	492999	4.56591e+06	8.43035e+06	1.48459e+06	6.81009e+06	2.08984e+06	3.55196e+06	4.25946e+06	9.3748e+06	2.27693e+06	2.82591e+06	1.492	0.208	1.582	2.975	0.578	1.202	0.612	1.305	1.41	2.372	0.831	0.587	1.716	0.92162
A0A0C4DH67	Immunoglobulin kappa variable 1-8 OS=Homo sapiens OX=9606 GN=IGKV1-8 PE=3 SV=1	IGKV1-8	43	11	323	1	12.5
P18428	Lipopolysaccharide-binding protein OS=Homo sapiens OX=9606 GN=LBP PE=1 SV=3	LBP	17	6	47	6	53.4	8.53134e+07	2.6504e+07	3.1653e+07	1.82787e+07	8.4809e+07	4.14999e+07	2.71491e+07	2.56325e+07	1.75685e+07	2.58075e+07	4.28602e+07	3.52761e+07	2.094	1.285	1.261	0.742	3.795	0.842	0.914	1.082	0.669	0.751	1.799	0.842	0.716	0.0535984
P69905	Hemoglobin subunit alpha OS=Homo sapiens OX=9606 GN=HBA1 PE=1 SV=2	HBA1	83	34	781	34	15.2	1.70417e+09	6.00078e+08	2.01903e+09	1.83992e+08	7.74189e+07	9.32989e+07	6.72522e+08	2.50614e+08	2.27169e+09	1.77527e+08	7.24208e+07	7.22768e+07	2.36	1.641	4.538	0.421	0.195	0.107	1.278	0.597	4.878	0.291	0.171	0.097	0.742	0.0790005
P04196	Histidine-rich glycoprotein OS=Homo sapiens OX=9606 GN=HRG PE=1 SV=1	HRG	66	31	416	31	59.5	2.50091e+08	2.35819e+08	1.55739e+08	3.71105e+08	1.27043e+09	5.70146e+08	6.75676e+08	4.25456e+08	1.17574e+08	8.59273e+08	1.40605e+09	9.1428e+08	0.391	0.729	0.396	0.96	3.624	0.737	1.451	1.145	0.285	1.593	3.763	1.391	1.764	0.113938
P15814	Immunoglobulin lambda-like polypeptide 1 OS=Homo sapiens OX=9606 GN=IGLL1 PE=1 SV=1	IGLL1	21	9	102	4	22.9	3.48346e+07	1.4225e+07	6.78436e+06	4.71425e+06	2.33954e+07	1.40417e+07	9.13471e+06	8.95744e+06	3.68028e+06	4.47213e+06	1.13051e+07	9.1595e+06	2.732	2.203	0.863	0.611	3.345	0.91	0.983	1.209	0.448	0.416	1.516	0.698	0.555	0.00260929
Q9BX67	Junctional adhesion molecule C OS=Homo sapiens OX=9606 GN=JAM3 PE=1 SV=1	JAM3	3	1	2	1	35	506332		543333	256727	324738	703201		304638	467590	659788		665222
Q5TCX8	Mitogen-activated protein kinase kinase kinase 21 OS=Homo sapiens OX=9606 GN=MAP3K21 PE=1 SV=3	MAP3K21	1	1	11	1	113.9	7.53463e+06	7.05637e+06	1.34392e+07	9.90356e+06	3.69357e+07	1.77704e+07	1.28189e+07	8.22839e+06	2.31701e+07	1.82125e+07	3.60692e+07	2.04623e+07
P01871	Immunoglobulin heavy constant mu OS=Homo sapiens OX=9606 GN=IGHM PE=1 SV=4	IGHM	50	19	411	19	49.4	1.09659e+09	2.93816e+08	1.31043e+08	2.33908e+08	1.15122e+08	2.63058e+08	1.27299e+09	3.27744e+08	3.39799e+08	3.24275e+08	1.40829e+08	1.83477e+08	2.636	1.394	0.511	0.929	0.504	0.522	4.197	1.355	1.266	0.923	0.579	0.429	1.334	0.25461
Q9Y547	Intraflagellar transport protein 25 homolog OS=Homo sapiens OX=9606 GN=HSPB11 PE=1 SV=1	HSPB11	17	1	4	1	16.3			460189	465512					263321	432434	58756.8
P20042	Eukaryotic translation initiation factor 2 subunit 2 OS=Homo sapiens OX=9606 GN=EIF2S2 PE=1 SV=2	EIF2S2	3	1	1	1	38.4	789236		440578	291549	1.19378e+07		230620		6.44788e+06		7.21886e+06
Q7Z3Y8	Keratin, type I cytoskeletal 27 OS=Homo sapiens OX=9606 GN=KRT27 PE=1 SV=2	KRT27	10	6	54	1	49.8	325410		402330		180818	188209	753627	286915		289695	437141
P13473	Lysosome-associated membrane glycoprotein 2 OS=Homo sapiens OX=9606 GN=LAMP2 PE=1 SV=2	LAMP2	9	4	38	4	44.9	8.27532e+07	1.05539e+07	3.01052e+07	9.45385e+07	1.34017e+07	3.67533e+07	2.04043e+07	2.8416e+07	5.29237e+07	1.85865e+07	1.35547e+07	2.22137e+07	2.214	0.558	1.307	4.181	0.654	0.813	0.749	1.308	2.195	0.589	0.62	0.578	1.027	0.454179
P01718	Immunoglobulin lambda variable 3-27 OS=Homo sapiens OX=9606 GN=IGLV3-27 PE=1 SV=2	IGLV3-27	50	8	69	4	12.2	1.62817e+07	2.65778e+07	5.39488e+06	1.23705e+07	2.27589e+07	7.29256e+07	1.8839e+07	3.83815e+07	6.96608e+06	1.33833e+07	1.64299e+07	4.59266e+07	0.624	2.011	0.335	0.783	1.589	2.309	0.99	2.53	0.414	0.607	1.076	1.71	1.046	0.963054
Q8WU39	Marginal zone B- and B1-cell-specific protein OS=Homo sapiens OX=9606 GN=MZB1 PE=1 SV=1	MZB1	40	5	10	5	20.7	1.54335e+07	3.64671e+06	3.98286e+06	3.42353e+06	5.67202e+06	1.16927e+07	2.77187e+06	2.73253e+06	3.1207e+06	2.30353e+06	3.09109e+06	6.36958e+06	2.727	1.272	1.142	1	1.827	1.707	0.672	0.83	0.855	0.482	0.934	1.094	0.547	0.00967206
P23142	Fibulin-1 OS=Homo sapiens OX=9606 GN=FBLN1 PE=1 SV=4	FBLN1	32	17	151	6	77.2	2.303e+07	2.41358e+07	4.83104e+07	3.17796e+07	3.73623e+07	1.19126e+08	4.12147e+07	2.14436e+07	5.45816e+07	6.14242e+07	6.75064e+07	9.52652e+07	0.418	0.865	1.423	0.954	1.236	1.787	1.026	0.67	1.536	1.321	2.096	1.681	1.388	0.202459
P02751	Fibronectin OS=Homo sapiens OX=9606 GN=FN1 PE=1 SV=5	FN1	38	68	629	43	272.2	1.74648e+08	9.12289e+07	2.3187e+08	9.49707e+07	2.8427e+08	5.60858e+08	1.9417e+08	8.175e+07	4.68038e+08	1.57099e+08	3.87405e+08	6.22653e+08	0.592	0.611	1.275	0.532	1.756	1.571	0.903	0.477	2.459	0.631	2.245	2.051	1.334	0.0941401
P34059	N-acetylgalactosamine-6-sulfatase OS=Homo sapiens OX=9606 GN=GALNS PE=1 SV=1	GALNS	4	2	2	2	58	1.64358e+06			4.60252e+06		1.16619e+06						1.99164e+06	0.661			3.06		0.388						0.779	2.008
P02792	Ferritin light chain OS=Homo sapiens OX=9606 GN=FTL PE=1 SV=2	FTL	25	3	11	3	20			5.42595e+06	6.50661e+06	269978	5.8652e+06		1.95379e+06	7.22845e+06		656751	1.84751e+06			2.239	2.735	0.125	1.233		0.855	2.85		0.286	0.457	1.311	0.966428
Q12840	Kinesin heavy chain isoform 5A OS=Homo sapiens OX=9606 GN=KIF5A PE=1 SV=2	KIF5A	1	1	64	1	117.3	1.55321e+08	1.76664e+08	1.64337e+08	1.80203e+08	1.47941e+08	9.92889e+07	1.24832e+08	1.74693e+08	1.64563e+08	1.3345e+08	1.44602e+08	8.69025e+07
P01597	Immunoglobulin kappa variable 1-39 OS=Homo sapiens OX=9606 GN=IGKV1-39 PE=1 SV=2	IGKV1-39	44	16	422	1	12.7	2.19862e+08	1.15219e+08	1.59249e+08	1.25147e+08	2.70322e+08	3.78983e+08	2.12866e+08	9.93828e+07	1.47552e+08	1.80398e+08	2.58008e+08	2.74305e+08
Q9P244	Leucine-rich repeat and fibronectin type III domain-containing protein 1 OS=Homo sapiens OX=9606 GN=LRFN1 PE=1 SV=2	LRFN1	1	1	5	1	82.3	2.96679e+08	2.65444e+08	3.55098e+08	3.15039e+08	2.43089e+08	1.26693e+08	1.90419e+08	2.98972e+08	2.98365e+08	3.15177e+08	1.79013e+08	1.56528e+08
A0A075B6I0	Immunoglobulin lambda variable 8-61 OS=Homo sapiens OX=9606 GN=IGLV8-61 PE=3 SV=7	IGLV8-61	27	4	67	4	12.8	2.32641e+08	1.57887e+08	1.47113e+08	1.7391e+08	2.26426e+08	3.64639e+08	1.5058e+08	1.91055e+08	1.94743e+08	1.85579e+08	1.98055e+08	2.22763e+08	1.08	1.447	1.108	1.334	1.915	1.398	0.959	1.525	1.401	1.02	1.572	1.005	0.918	0.282346
A0A075B6K5	Immunoglobulin lambda variable 3-9 OS=Homo sapiens OX=9606 GN=IGLV3-9 PE=3 SV=1	IGLV3-9	63	9	190	4	12.3	4.2176e+07	1.72112e+07	1.26378e+07	2.58011e+07	2.96258e+07	1.79089e+08	3.29818e+07	2.15754e+07	1.56711e+07	3.06937e+07	1.99388e+07	8.66214e+07	0.931	0.75	0.453	0.942	1.192	3.268	0.999	0.82	0.536	0.803	0.753	1.859	0.9	0.308308
Q15843	NEDD8 OS=Homo sapiens OX=9606 GN=NEDD8 PE=1 SV=1	NEDD8	31	2	6	1	9.1	756565	82163	84369.4	45194.4	207635	2.88532e+06	237143	58485.4	46568	203412	272665	3.15785e+06
P29966	Myristoylated alanine-rich C-kinase substrate OS=Homo sapiens OX=9606 GN=MARCKS PE=1 SV=4	MARCKS	10	1	1	1	31.5	887397
Q9UGM5	Fetuin-B OS=Homo sapiens OX=9606 GN=FETUB PE=1 SV=2	FETUB	34	10	123	10	42	6.88863e+07	2.43093e+07	2.83025e+07	2.90352e+07	5.45048e+07	4.34216e+07	5.74589e+07	3.3508e+07	1.58069e+07	4.51236e+07	5.67546e+07	4.69304e+07	1.551	1.081	1.034	1.081	2.237	0.808	1.775	1.298	0.552	1.204	2.185	1.027	1.04	0.986218
P04899	Guanine nucleotide-binding protein G(i) subunit alpha-2 OS=Homo sapiens OX=9606 GN=GNAI2 PE=1 SV=3	GNAI2	6	2	4	1	40.4	1.22036e+06									1.36559e+06
P11226	Mannose-binding protein C OS=Homo sapiens OX=9606 GN=MBL2 PE=1 SV=2	MBL2	12	3	19	3	26.1	1.33459e+06	2.84529e+06		136557	5.38497e+06	9.28326e+06	3.04593e+06	4.17414e+06	5.80276e+06	1.24445e+06	9.12354e+06	8.22841e+06	0.274	1.155		0.046	2.018	1.577	0.859	1.476	1.85	0.303	3.207	1.644	2.726	0.0889029
P78417	Glutathione S-transferase omega-1 OS=Homo sapiens OX=9606 GN=GSTO1 PE=1 SV=2	GSTO1	20	5	33	5	27.5	8.10938e+06	1.51205e+06	3.30888e+06	1.789e+06	4.16699e+06	1.85573e+07	3.31468e+06	2.22232e+06	6.01809e+06	6.53833e+06	3.68485e+06	1.15597e+07	1.3	0.479	0.861	0.474	1.218	2.459	0.729	0.613	1.496	1.242	1.01	1.802	1.293	0.649661
P51858	Hepatoma-derived growth factor OS=Homo sapiens OX=9606 GN=HDGF PE=1 SV=1	HDGF	20	4	6	4	26.8	1.52561e+06					3.26845e+06	679208		816847			348390	1.087					1.924	0.664		0.902			0.241	0.368	0.351692
P60842	Eukaryotic initiation factor 4A-I OS=Homo sapiens OX=9606 GN=EIF4A1 PE=1 SV=1	EIF4A1	12	4	4	3	46.1	1.12218e+07	43644.9	3.65393e+06					5.06796e+06	4.11826e+06				2.202	0.017	1.163					1.71	1.253				50.833	0.48971
P31025	Lipocalin-1 OS=Homo sapiens OX=9606 GN=LCN1 PE=1 SV=1	LCN1	24	4	31	4	19.2	1.60605e+07	8.84255e+06	1.03255e+07	1.63172e+07	1.37146e+06	2.2095e+07	8.5694e+06	2.46531e+07	1.23081e+07	8.42528e+06	2.90802e+06	1.216e+07	1.266	1.376	1.32	2.125	0.197	1.439	0.926	3.342	1.504	0.786	0.392	0.931	1.218	0.984037
A0A075B6S5	Immunoglobulin kappa variable 1-27 OS=Homo sapiens OX=9606 GN=IGKV1-27 PE=3 SV=1	IGKV1-27	44	18	626	2	12.7	8.17745e+08	3.34963e+08	3.21931e+08	4.92257e+08	5.71301e+08	8.89526e+08	7.09696e+08	3.76639e+08	4.17963e+08	5.60956e+08	7.3184e+08	5.61354e+08	1.368	1.106	0.874	1.361	1.742	1.229	1.628	1.084	1.084	1.111	2.093	0.913	1.029	0.92566
O96009	Napsin-A OS=Homo sapiens OX=9606 GN=NAPSA PE=1 SV=1	NAPSA	8	3	18	3	45.4	1.13501e+07	2.80486e+06	7.45066e+06	1.60457e+07	2.74663e+06	4.84528e+06	3.71695e+06	3.77249e+06	5.06961e+06	2.43878e+06	1.1649e+06	959686	2.066	1.008	2.2	4.826	0.911	0.729	0.928	1.181	1.43	0.526	0.362	0.17	0.502	0.0373734
Q5VUB5	Protein FAM171A1 OS=Homo sapiens OX=9606 GN=FAM171A1 PE=1 SV=1	FAM171A1	1	1	2	1	97.8										446479
P84243	Histone H3.3 OS=Homo sapiens OX=9606 GN=H3-3A PE=1 SV=2	H3-3A	22	4	35	1	15.3	1.92683e+08	1.8918e+06	1.13202e+07	1.68123e+06	2.25095e+06	9.10393e+06	4.52602e+06	3.63176e+06	3.02665e+07	8.29455e+07	1.79396e+06	1.44396e+07
P01601	Immunoglobulin kappa variable 1D-16 OS=Homo sapiens OX=9606 GN=IGKV1D-16 PE=3 SV=2	IGKV1D-16	44	16	478	2	12.7	6.34086e+07	3.19676e+07	2.47273e+07	2.29903e+07	5.65265e+07	6.22312e+07	5.46577e+07	2.98533e+07	2.79613e+07	3.76506e+07	4.33585e+07	4.91001e+07	1.427	1.42	0.903	0.855	2.318	1.157	1.687	1.155	0.975	1.004	1.668	1.074	0.983	0.698889
O00187	Mannan-binding lectin serine protease 2 OS=Homo sapiens OX=9606 GN=MASP2 PE=1 SV=4	MASP2	10	5	70	5	75.7	1.4298e+08	6.56896e+07	7.76758e+07	2.272e+08	8.42746e+07	3.54701e+08	2.00771e+08	6.75964e+07	5.65294e+07	2.04825e+08	7.80357e+07	2.41257e+08	0.901	0.817	0.794	2.366	0.968	1.847	1.735	0.733	0.552	1.529	0.841	1.477	0.972	0.548903
Q16819	Meprin A subunit alpha OS=Homo sapiens OX=9606 GN=MEP1A PE=1 SV=2	MEP1A	5	2	17	2	84.4	4.1737e+06	3.90421e+06	4.28244e+06		1.01821e+07	7.16787e+06	4.73054e+06	2.27265e+06	1.96147e+06	1.0806e+06	1.04356e+07	6.68438e+06	0.764	1.41	1.271		3.395	1.083	1.187	0.715	0.556	0.234	3.264	1.189	0.911	0.445497
P17813	Endoglin OS=Homo sapiens OX=9606 GN=ENG PE=1 SV=2	ENG	7	3	8	3	70.5	835984	1.85513e+06	1.34568e+06	2.60567e+06	659196	1.50006e+06	2.39348e+06	2.04828e+06	756895	2.28551e+06	2.13903e+06	1.39215e+06	0.479	2.098	1.251	2.467	0.688	0.71	1.88	2.018	0.672	1.551	2.095	0.775	1.698	0.50502
O75487	Glypican-4 OS=Homo sapiens OX=9606 GN=GPC4 PE=1 SV=4	GPC4	7	3	18	3	62.4	730124	179912	1.59241e+06	1.02607e+06		600390	496079	610501	1.71642e+06	1.09917e+06		608895	0.797	0.388	2.822	1.852		0.542	0.743	1.147	2.906	1.422		0.646	1.376	0.461189
P04264	Keratin, type II cytoskeletal 1 OS=Homo sapiens OX=9606 GN=KRT1 PE=1 SV=6	KRT1	51	45	367	34	66	2.03557e+08	2.23175e+08	5.73476e+07	6.94659e+07	7.62752e+07	1.42422e+08	1.82932e+08	5.60977e+07	4.40194e+08	1.40153e+09	5.99007e+07	1.63504e+08	0.751	1.626	0.343	0.424	0.513	0.434	0.926	0.356	2.518	6.126	0.378	0.586	4.221	0.413636
Q05315	Galectin-10 OS=Homo sapiens OX=9606 GN=CLC PE=1 SV=3	CLC	20	3	37	3	16.4	5.4502e+06	1.5884e+07	5.07563e+06	8.6821e+06	4.5362e+06	5.03028e+07	1.10311e+07	2.0144e+07	2.62769e+06	1.59926e+07	3.57418e+07	6.56957e+07	0.257	1.476	0.388	0.675	0.389	1.956	0.712	1.631	0.192	0.892	2.876	3.005	2.437	0.221895
A0A075B6H9	Immunoglobulin lambda variable 4-69 OS=Homo sapiens OX=9606 GN=IGLV4-69 PE=1 SV=1	IGLV4-69	34	3	20	3	12.8	2.12448e+07	2.31828e+07	1.62362e+07	1.04138e+07	3.24236e+07	2.14157e+06	2.11318e+07	1.25147e+07	1.68588e+07	9583691	4.45291e+07	236872	1.146	2.469	1.421	0.928	3.187	0.095	1.563	1.161	1.409	0.612	4.105	0.012	0.817	0.27404
A0A075B6K6	Immunoglobulin lambda variable 4-3 OS=Homo sapiens OX=9606 GN=IGLV4-3 PE=3 SV=1	IGLV4-3	8	1	2	1	13.3
P52597	Heterogeneous nuclear ribonucleoprotein F OS=Homo sapiens OX=9606 GN=HNRNPF PE=1 SV=3	HNRNPF	11	3	4	1	45.6
P01857	Immunoglobulin heavy constant gamma 1 OS=Homo sapiens OX=9606 GN=IGHG1 PE=1 SV=1	IGHG1	81	80	6862	24	36.1	3.65275e+10	2.6415e+10	2.35718e+10	2.47223e+10	4.42755e+10	3.64402e+10	4.62489e+10	2.93909e+10	2.49139e+10	2.97725e+10	4.52712e+10	3.94042e+10	1.019	1.455	1.067	1.14	2.251	0.84	1.769	1.41	1.077	0.984	2.159	1.068	1.135	0.398533
P13647	Keratin, type II cytoskeletal 5 OS=Homo sapiens OX=9606 GN=KRT5 PE=1 SV=3	KRT5	56	39	153	22	62.3	2.04405e+07	7.48255e+06	4.82739e+07	2.83738e+07	1.26346e+07	2.13999e+07	1.36141e+07	9.57314e+06	2.6156e+07	2.9093e+08	1.45062e+07	2.18628e+07	0.45	0.326	1.726	1.033	0.507	0.39	0.411	0.363	0.893	7.592	0.546	0.468	2.028	0.497725
P19827	Inter-alpha-trypsin inhibitor heavy chain H1 OS=Homo sapiens OX=9606 GN=ITIH1 PE=1 SV=3	ITIH1	49	32	351	32	101.3	3.59281e+08	2.90751e+08	3.73358e+08	3.80025e+08	4.90725e+08	3.23378e+08	7.30273e+08	4.03663e+08	4.65666e+08	4.44376e+08	5.95001e+08	3.89835e+08	0.777	1.242	1.311	1.359	1.935	0.578	2.167	1.502	1.562	1.139	2.201	0.82	1.431	0.146869
P50053	Ketohexokinase OS=Homo sapiens OX=9606 GN=KHK PE=1 SV=2	KHK	12	2	4	2	32.5			854517	1.01013e+06		944671		648744	1.02575e+06		899979	1.02074e+06			1.433	1.726		0.807		1.154	1.644		1.591	1.026	1.209	0.169177
Q6YN16	Hydroxysteroid dehydrogenase-like protein 2 OS=Homo sapiens OX=9606 GN=HSDL2 PE=1 SV=1	HSDL2	2	1	2	1	45.4						1.37684e+06						1.58957e+06
Q00839	Heterogeneous nuclear ribonucleoprotein U OS=Homo sapiens OX=9606 GN=HNRNPU PE=1 SV=6	HNRNPU	8	5	6	5	90.5	6.04212e+06			782285								168341	2.452			0.525								0.066
P55010	Eukaryotic translation initiation factor 5 OS=Homo sapiens OX=9606 GN=EIF5 PE=1 SV=2	EIF5	2	1	1	1	49.2	3.20445e+06	2.10449e+06			1.73648e+06	1.81689e+06			2.4287e+06			1.54209e+06
A0A075B6K4	Immunoglobulin lambda variable 3-10 OS=Homo sapiens OX=9606 GN=IGLV3-10 PE=3 SV=2	IGLV3-10	54	12	113	3	12.4	2.77775e+07	6.40468e+06	6.37959e+06	1.45571e+07	3.1064e+07	3.85604e+07	2.56701e+07	9.68665e+06	6.38421e+06	1.33219e+07	2.27279e+07	2.18897e+07	1.405	0.64	0.524	1.217	2.863	1.611	1.781	0.843	0.501	0.798	1.965	1.076	0.925	0.398187
A0A0C4DH33	Immunoglobulin heavy variable 1-24 OS=Homo sapiens OX=9606 GN=IGHV1-24 PE=3 SV=1	IGHV1-24	34	7	149	2	12.8	3.43827e+06			1.54276e+06	3.59557e+06	3.53853e+06	4.39365e+06		247122		3.29719e+06	4.34406e+06	1.066			0.791	2.033	0.907	1.869		0.119		1.748	1.31	1.352	0.34698
Q9BQ69	ADP-ribose glycohydrolase MACROD1 OS=Homo sapiens OX=9606 GN=MACROD1 PE=1 SV=2	MACROD1	10	2	10	2	35.5	2.03259e+07	8.15839e+06	7.60284e+06	1.06414e+07	7.05201e+06	7.97329e+06	1.27829e+07	6.57154e+06	6.09868e+06	1.20478e+07	7.38801e+06	6.85484e+06	2.033	1.611	1.234	1.759	1.285	0.659	1.754	1.13	0.946	1.427	1.263	0.666	0.856	0.0368478
Q14210	Lymphocyte antigen 6D OS=Homo sapiens OX=9606 GN=LY6D PE=1 SV=1	LY6D	23	3	22	3	13.3	1.13902e+07	2.82575e+06	6.16241e+06	5.66348e+06	1.02324e+07	1.2504e+07	8.09412e+06	1.5436e+06	5.04847e+06	9.83145e+06	7.77779e+06	8.24449e+06	1.447	0.709	1.271	1.189	2.37	1.313	1.411	0.337	0.995	1.48	1.69	1.018	0.828	0.139344
A0A0B4J1V1	Immunoglobulin heavy variable 3-21 OS=Homo sapiens OX=9606 GN=IGHV3-21 PE=1 SV=1	IGHV3-21	49	10	470	2	12.8	2.638e+06			556587	2.77542e+06	7.19575e+06	4.50029e+06	258405	663474	827616	2.3667e+06	7.43047e+06	0.854			0.298	1.638	1.925	1.999	0.144	0.333	0.317	1.31	2.339	1.355	0.402734
P55103	Inhibin beta C chain OS=Homo sapiens OX=9606 GN=INHBC PE=2 SV=1	INHBC	16	4	16	4	38.2	666148	1.10119e+06	1.38828e+06	689009	1.58694e+06	1.11562e+07	2.08548e+06	1.85278e+06	917326	1.3511e+06	1.03846e+06	5.04612e+06	0.262	0.855	0.885	0.448	1.137	3.623	1.124	1.253	0.559	0.629	0.698	1.928	1.49	0.770866
A0A0A0MT36	Immunoglobulin kappa variable 6D-21 OS=Homo sapiens OX=9606 GN=IGKV6D-21 PE=3 SV=1	IGKV6D-21	29	2	36	1	12.3	4.60601e+07	3.21178e+07	9.66101e+06	3.48878e+07	1.05781e+07	2.72147e+07	4.28319e+07	3.46847e+07	1.37294e+07	5.06265e+07	1.03205e+07	1.7426e+07
P20774	Mimecan OS=Homo sapiens OX=9606 GN=OGN PE=1 SV=1	OGN	42	13	60	13	33.9	3.68569e+06	2.49113e+06	4.96102e+06	3.73243e+06	6.29645e+06	8.08762e+07	2.01455e+07			10820298	8.84239e+06	7.43866e+07	0.161	0.215	0.352	0.27	0.502	2.923	1.209			0.561	0.661	3.163	2.996	0.173098
P08253	72 kDa type IV collagenase OS=Homo sapiens OX=9606 GN=MMP2 PE=1 SV=2	MMP2	11	7	18	6	73.8	807983	198534	710214	185637	4.16015e+06	386085	2.89987e+06		375026	318796	4.89914e+06	1.53631e+06	0.51	0.248	0.728	0.194	4.788	0.201	2.512		0.367	0.238	5.289	0.943	2.491	0.281117
Q9UKX2	Myosin-2 OS=Homo sapiens OX=9606 GN=MYH2 PE=1 SV=1	MYH2	1	2	4	2	222.9	3.63501e+06	1.71447e+06	226739	2.58821e+06	604445	930428	648931	1.41338e+06	1.60705e+06	624183	1.08547e+06		2.508	2.336	0.254	2.952	0.76	0.531	0.614	1.678	1.719	0.51	1.281		1.918	0.766316
Q99972	Myocilin OS=Homo sapiens OX=9606 GN=MYOC PE=1 SV=2	MYOC	23	10	77	10	56.9	2.78198e+07	3.32328e+07	2.9597e+07	1.26752e+07	2.33754e+07	1.88009e+08	2.07174e+07	2.35754e+07	2.13036e+07	1.75086e+07	2.25641e+07	1.91031e+08	0.516	1.218	0.892	0.389	0.791	2.884	0.528	0.753	0.613	0.385	0.716	3.447	0.903	0.269996
Q9H307	Pinin OS=Homo sapiens OX=9606 GN=PNN PE=1 SV=5	PNN	2	2	5	2	81.6	3.69445e+06	3.64444e+06	790782	1.00267e+06		2.44248e+06	1.3572e+06	1.00536e+06	1.10178e+06		1.90515e+06	1.87108e+06	1.857	3.618	0.645	0.833		1.015	0.936	0.869	0.859		1.638	0.914	0.744	0.286037
P07738	Bisphosphoglycerate mutase OS=Homo sapiens OX=9606 GN=BPGM PE=1 SV=2	BPGM	15	3	9	3	30		4.2012e+06	3.22572e+06	1.00676e+07	2.80089e+06	1.33354e+07	1.63907e+06	5.67595e+06	3.29771e+06	1.36488e+07	2.58161e+06	2.06991e+07		1.063	0.671	2.133	0.654	1.412	0.288	1.251	0.655	2.072	0.566	2.579	1.163	0.437565
P04792	Heat shock protein beta-1 OS=Homo sapiens OX=9606 GN=HSPB1 PE=1 SV=2	HSPB1	63	11	48	11	22.8	1.21379e+07	4.63065e+06	6.5401e+06	9.11733e+06	6.37964e+06	6.11729e+07	9.21668e+06	4.01972e+06	1.08591e+07	2.14335e+08	5.04832e+06	4.25669e+07	0.357	0.269	0.312	0.443	0.342	1.486	0.372	0.203	0.495	7.466	0.254	1.217	3.633	0.429071
O14979	Heterogeneous nuclear ribonucleoprotein D-like OS=Homo sapiens OX=9606 GN=HNRNPDL PE=1 SV=3	HNRNPDL	6	2	2	1	46.4
P07900	Heat shock protein HSP 90-alpha OS=Homo sapiens OX=9606 GN=HSP90AA1 PE=1 SV=5	HSP90AA1	27	19	41	11	84.6	9.74258e+07	2.60548e+06	1.1695e+07	2.51137e+06	9.28365e+06	7.089e+06	4.55336e+06	2.19385e+06	1.01797e+07	2.33198e+07	3.89684e+06	8.37577e+06	6.039	0.319	1.176	0.257	1.049	0.363	0.387	0.234	0.978	1.712	0.413	0.505	1.679	0.624287
P24592	Insulin-like growth factor-binding protein 6 OS=Homo sapiens OX=9606 GN=IGFBP6 PE=1 SV=1	IGFBP6	16	3	9	3	25.3				365724	498462	7.76312e+06					562906	9.62809e+06				0.152	0.228	1.612					0.242	2.352	1.26	0.400401
A0A075B6J9	Immunoglobulin lambda variable 2-18 OS=Homo sapiens OX=9606 GN=IGLV2-18 PE=3 SV=2	IGLV2-18	25	3	85	2	12.4	2.22665e+07	1.74287e+07	2.23346e+07	2.67003e+07	2.2453e+07	6.63948e+07	1.93359e+07	1.85178e+07	1.69979e+07	2.19246e+07	2.76274e+07	3.76017e+07	0.791	1.222	1.287	1.567	1.453	1.948	0.942	1.131	0.936	0.922	1.678	1.298	0.876	0.218969
Q9NQ38	Serine protease inhibitor Kazal-type 5 OS=Homo sapiens OX=9606 GN=SPINK5 PE=1 SV=2	SPINK5	4	4	5	4	120.6			140574			1.63911e+06	1.77169e+06	1.68876e+06	1.32318e+06	2.12508e+06	1.25507e+06	2.60623e+06			0.138			0.817	1.465	1.752	1.237	1.518	1.294	1.527	5.416	0.323152
P58166	Inhibin beta E chain OS=Homo sapiens OX=9606 GN=INHBE PE=1 SV=1	INHBE	15	3	4	3	38.5						7.46211e+06	309741					7.03609e+06						1.182	0.081					1.311	1.109
Q53EL6	Programmed cell death protein 4 OS=Homo sapiens OX=9606 GN=PDCD4 PE=1 SV=2	PDCD4	4	1	1	1	51.7	701873	907207	936386	1.03088e+06				954353	750025	666638
A0A0C4DH29	Immunoglobulin heavy variable 1-3 OS=Homo sapiens OX=9606 GN=IGHV1-3 PE=3 SV=1	IGHV1-3	48	10	234	2	13	4.94252e+08	2.81319e+08	3.38085e+08	3.59597e+08	4.61563e+08	5.43198e+08	5.72836e+08	3.47376e+08	4.11982e+08	4.81847e+08	5.81618e+08	6.04857e+08	1.024	1.151	1.137	1.231	1.743	0.93	1.628	1.238	1.323	1.183	2.06	1.218	1.214	0.0504035
P35527	Keratin, type I cytoskeletal 9 OS=Homo sapiens OX=9606 GN=KRT9 PE=1 SV=3	KRT9	49	29	175	28	62	1.32934e+08	1.36263e+08	7.06631e+07	7.61107e+07	9.43848e+07	9.98012e+07	1.02081e+08	7.32634e+07	3.01201e+08	1.11595e+08	9.26217e+07	1.06746e+08	1.08	2.185	0.931	1.022	1.397	0.67	1.137	1.023	3.792	1.074	1.286	0.843	1.471	0.626597
Q8N2S1	Latent-transforming growth factor beta-binding protein 4 OS=Homo sapiens OX=9606 GN=LTBP4 PE=1 SV=2	LTBP4	1	1	1	1	173.3	2.02295e+06	1.40742e+06	5.64241e+06			3.0607e+07	3.89081e+06	1.74315e+06	4.57587e+06	1.35798e+06	1.76277e+06	1.94229e+07
A0A075B6I1	Immunoglobulin lambda variable 4-60 OS=Homo sapiens OX=9606 GN=IGLV4-60 PE=3 SV=1	IGLV4-60	16	2	10	2	13	6.79193e+06	365142		391239	4.78259e+06	6.89944e+06	4.36772e+06		210360	304194	6.14579e+06	4.45983e+06	1.85	0.196		0.176	2.375	1.553	1.632		0.089	0.098	2.863	1.181	0.851	0.302361
P01721	Immunoglobulin lambda variable 6-57 OS=Homo sapiens OX=9606 GN=IGLV6-57 PE=1 SV=2	IGLV6-57	63	12	195	10	12.6	1.67854e+08	2.0551e+08	9.36491e+07	1.67808e+08	2.18629e+08	4.93129e+08	1.65564e+08	3.01542e+08	1.01824e+08	1.36614e+08	2.06313e+08	3.17482e+08	0.74	1.788	0.67	1.222	1.756	1.795	1.001	2.286	0.696	0.713	1.554	1.36	0.983	0.672414
P15529	Membrane cofactor protein OS=Homo sapiens OX=9606 GN=CD46 PE=1 SV=3	CD46	6	2	4	2	43.7	175674		127986			529241				100870	112670	262167	0.762		0.901			1.897				0.518	0.835	1.105	0.582
Q641Q3	Meteorin-like protein OS=Homo sapiens OX=9606 GN=METRNL PE=2 SV=1	METRNL	9	2	5	2	34.4			743253		366327	8.40529e+06	1.48571e+06		538580			5.72032e+06			0.397		0.22	2.284	0.67		0.275			1.828	0.747	0.152899
Q96HC4	PDZ and LIM domain protein 5 OS=Homo sapiens OX=9606 GN=PDLIM5 PE=1 SV=5	PDLIM5	4	1	1	1	63.9
Q14165	Malectin OS=Homo sapiens OX=9606 GN=MLEC PE=1 SV=1	MLEC	32	10	59	10	32.2	1.23601e+07	6.11233e+06	1.44006e+07	3.61675e+06	9.06443e+06	4.05361e+07	1.5787e+07	8.19466e+06	1.08364e+07	8.67681e+06	6.36047e+06	2.84917e+07	0.853	0.833	1.613	0.413	1.14	2.312	1.495	0.973	1.16	0.709	0.751	1.912	1.14	0.774592
Q92887	ATP-binding cassette sub-family C member 2 OS=Homo sapiens OX=9606 GN=ABCC2 PE=1 SV=3	ABCC2	1	1	4	1	174.1		1.27456e+06	1.73041e+06		140782	2.41378e+06	892916	1.11996e+06	1.51219e+06		140629	1.86743e+06
Q99519	Sialidase-1 OS=Homo sapiens OX=9606 GN=NEU1 PE=1 SV=1	NEU1	7	3	5	3	45.4	901744	485533	4.65069e+06	6.01484e+06	3.83139e+06	8.61169e+06	2.25551e+06	429750	955547		5.0566e+06	6.45634e+06	0.237	0.252	1.98	2.609	1.832	1.867	0.812	0.194	0.389		2.269	1.647	1.303	0.816782
Q15113	Procollagen C-endopeptidase enhancer 1 OS=Homo sapiens OX=9606 GN=PCOLCE PE=1 SV=2	PCOLCE	35	11	116	11	47.9	3.13571e+07	1.71892e+07	4.22735e+07	3.32017e+07	1.75012e+07	1.18134e+08	3.36131e+07	4.85922e+07	5.30622e+07	6.47837e+07	2.42823e+07	1.39262e+08	0.571	0.618	1.249	0.999	0.581	1.778	0.84	1.522	1.498	1.398	0.756	2.465	1.537	0.0123474
P31942	Heterogeneous nuclear ribonucleoprotein H3 OS=Homo sapiens OX=9606 GN=HNRNPH3 PE=1 SV=2	HNRNPH3	5	1	1	1	36.9	214400						213498					83214.9
P19012	Keratin, type I cytoskeletal 15 OS=Homo sapiens OX=9606 GN=KRT15 PE=1 SV=3	KRT15	25	15	96	4	49.2										9.26805e+06												1.12
O15066	Kinesin-like protein KIF3B OS=Homo sapiens OX=9606 GN=KIF3B PE=1 SV=1	KIF3B	3	2	4	2	85.1	2.16729e+07	3.68214e+07	4.81327e+07	5.14637e+06	3.44681e+06	1.08407e+07	2.72833e+07	2.17983e+07	4.92059e+07	6.90048e+07	7.59864e+07	5.44018e+07	0.581	1.948	2.092	0.228	0.168	0.24	1.002	1.004	2.043	2.19	3.48	1.416	6.573	0.104537
Q13508	Ecto-ADP-ribosyltransferase 3 OS=Homo sapiens OX=9606 GN=ART3 PE=1 SV=2	ART3	31	11	105	11	43.9	7.78899e+07	5.81702e+07	8.18173e+07	2.9851e+07	3.01052e+07	9.54852e+07	9.03663e+07	6.49469e+07	6.394e+07	47077624	4.31841e+07	8.82578e+07	1.147	1.691	1.954	0.726	0.808	1.161	1.825	1.644	1.459	0.821	1.087	1.263	1.146	0.358285
Q16836	Hydroxyacyl-coenzyme A dehydrogenase, mitochondrial OS=Homo sapiens OX=9606 GN=HADH PE=1 SV=3	HADH	2	1	1	1	34.3	6.57374e+06						162062				5.37659e+06
P02790	Hemopexin OS=Homo sapiens OX=9606 GN=HPX PE=1 SV=2	HPX	74	75	3532	75	51.6	9.77755e+09	8.19225e+09	1.43967e+10	1.07412e+10	1.74123e+10	1.66447e+10	1.56406e+10	7.79622e+09	9.53733e+09	1.18646e+10	1.70563e+10	1.86075e+10	0.704	1.165	1.682	1.278	2.285	0.99	1.545	0.965	1.064	1.012	2.099	1.302	1.114	0.933934
P26927	Hepatocyte growth factor-like protein OS=Homo sapiens OX=9606 GN=MST1 PE=1 SV=2	MST1	37	19	103	19	80.3	1.34724e+07	5.7571e+06	9.90391e+06	7.74811e+06	8.40477e+07	2.08393e+07	9.63279e+06	8.29756e+06	7.43491e+06	1.9147e+07	7.36202e+07	2.70051e+07	0.533	0.45	0.636	0.507	6.06	0.681	0.523	0.565	0.456	0.897	4.98	1.038	1.178	0.474508
Q15058	Kinesin-like protein KIF14 OS=Homo sapiens OX=9606 GN=KIF14 PE=1 SV=1	KIF14	1	1	4	1	186.4				1.92672e+06						1379415
P06312	Immunoglobulin kappa variable 4-1 OS=Homo sapiens OX=9606 GN=IGKV4-1 PE=1 SV=1	IGKV4-1	45	11	386	9	13.4	3.34968e+08	1.89905e+08	1.7485e+08	2.04334e+08	2.80315e+08	5.04918e+08	3.00855e+08	1.86928e+08	1.97948e+08	2.88e+08	2.62479e+08	3.62826e+08	1.156	1.294	0.979	1.166	1.763	1.44	1.424	1.11	1.059	1.178	1.549	1.217	0.984	0.695363
Q14767	Latent-transforming growth factor beta-binding protein 2 OS=Homo sapiens OX=9606 GN=LTBP2 PE=1 SV=3	LTBP2	1	2	6	2	194.9	686898	45743.8	159671	409171	442313	1.19656e+06	163713	153830	133790	399733	233632	233270	1.831	0.241	0.691	1.802	2.149	2.635	0.599	0.705	0.553	1.262	1.065	0.604	0.913	0.254258
Q9Y2E5	Epididymis-specific alpha-mannosidase OS=Homo sapiens OX=9606 GN=MAN2B2 PE=1 SV=4	MAN2B2	8	6	20	6	113.9	2.40438e+06	1.05276e+06	2.24167e+06	5.35361e+06	3.86631e+06	2.44626e+06	3.03924e+06	1.92054e+06	4.25374e+06	1.70822e+06	4.61053e+06	3.59301e+06	0.748	0.647	1.131	2.752	2.192	0.629	1.297	1.028	2.051	0.629	2.452	1.086	1.368	0.705611
O96033	Molybdopterin synthase sulfur carrier subunit OS=Homo sapiens OX=9606 GN=MOCS2 PE=1 SV=1	MOCS2	9	1	1	1	9.7	894883						765553
Q15084	Protein disulfide-isomerase A6 OS=Homo sapiens OX=9606 GN=PDIA6 PE=1 SV=1	PDIA6	26	9	22	9	48.1	1.00417e+07		1.51098e+06	2.07168e+06	2.42562e+06	1.82538e+07	2.50798e+06	1.28362e+06	2.0962e+06	3.21245e+06	3.64514e+06	1.4022e+07	1.711		0.418	0.583	0.753	2.57	0.586	0.376	0.554	0.648	1.062	2.322	1.019	0.74897
P01602	Immunoglobulin kappa variable 1-5 OS=Homo sapiens OX=9606 GN=IGKV1-5 PE=1 SV=2	IGKV1-5	40	13	364	5	12.8	2.07895e+08	1.75314e+08	6.55383e+07	1.84798e+08	2.39313e+08	4.88417e+08	1.91423e+08	1.9801e+08	1.03404e+08	2.23315e+08	2.31219e+08	3.51328e+08	0.887	1.477	0.454	1.303	1.861	1.722	1.12	1.453	0.684	1.129	1.687	1.457	1.062	0.718724
P00709	Alpha-lactalbumin OS=Homo sapiens OX=9606 GN=LALBA PE=1 SV=1	LALBA	6	1	2	1	16.2	1.34495e+06		1.0111e+06		2.56077e+06	1.93714e+06	1.71823e+06		564721	1.18781e+06	3.17575e+06	1.1616e+06
A0A075B6I4	Immunoglobulin lambda variable 10-54 OS=Homo sapiens OX=9606 GN=IGLV10-54 PE=3 SV=1	IGLV10-54	44	3	14	3	12.4	6.74781e+07	4.38818e+06	803560		4.17061e+06	159432	1.99075e+07	1.53907e+07			4.58772e+06	4.1035e+06	4.748	0.61	0.092		0.535	0.009	1.921	1.863			0.552	0.281	8.928	0.39771
P80748	Immunoglobulin lambda variable 3-21 OS=Homo sapiens OX=9606 GN=IGLV3-21 PE=1 SV=2	IGLV3-21	65	12	206	7	12.4	1.88384e+08	7.90013e+07	9.65061e+07	1.48029e+08	1.7783e+08	6.4828e+08	1.84296e+08	6.67234e+07	1.10527e+08	2.00164e+08	1.58607e+08	3.90607e+08	0.873	0.723	0.726	1.134	1.502	2.483	1.172	0.532	0.794	1.099	1.257	1.76	0.948	0.464846
P28300	Protein-lysine 6-oxidase OS=Homo sapiens OX=9606 GN=LOX PE=1 SV=2	LOX	7	2	2	2	46.9						3.59663e+06												0.782
O95274	Ly6/PLAUR domain-containing protein 3 OS=Homo sapiens OX=9606 GN=LYPD3 PE=1 SV=2	LYPD3	3	1	1	1	35.9
P48740	Mannan-binding lectin serine protease 1 OS=Homo sapiens OX=9606 GN=MASP1 PE=1 SV=3	MASP1	7	3	9	2	79.2	397037	475375	254828	505617	247303	1.08114e+06	719448	875534	665511		328113	725595	0.658	1.556	0.686	1.385	0.747	1.481	1.636	2.497	1.711		0.93	1.169	1.724	0.104872
Q9Y316	Protein MEMO1 OS=Homo sapiens OX=9606 GN=MEMO1 PE=1 SV=1	MEMO1	5	2	8	2	33.7	5.89953e+06	5.37046e+06	2.00626e+06	1.06823e+07	4.52814e+06	1.32134e+07	6.09644e+06	4.91635e+06	1.99876e+06	9.67308e+06	3.97867e+06	1.143e+07	0.839	1.509	0.463	2.511	1.174	1.553	1.19	1.203	0.441	1.63	0.968	1.58	0.943	0.449377
O14950	Myosin regulatory light chain 12B OS=Homo sapiens OX=9606 GN=MYL12B PE=1 SV=2	MYL12B	6	1	2	1	19.8	2.82865e+06		496716			631791				1.85391e+06
Q8NCC3	Phospholipase A2 group XV OS=Homo sapiens OX=9606 GN=PLA2G15 PE=1 SV=2	PLA2G15	8	3	14	3	46.6	1.04651e+07	1.61117e+06	2.06898e+06	3.81454e+06	2.198e+06	2.1971e+06	3.9286e+06	856867	2.75185e+06	1.63817e+06	3.20043e+06	1.13015e+06	3.312	1.007	1.063	1.995	1.268	0.575	1.706	0.467	1.35	0.614	1.732	0.348	0.755	0.135769
P04430	Immunoglobulin kappa variable 1-16 OS=Homo sapiens OX=9606 GN=IGKV1-16 PE=1 SV=2	IGKV1-16	44	8	249	2	12.6	2.98718e+06	893484	1.02481e+06	1.13554e+06	3.81725e+06	5.06068e+06	5.234e+06	1.09354e+06	1.16965e+06	1.36184e+06	6.86378e+06	3.32221e+06	0.998	0.59	0.556	0.627	2.325	1.397	2.399	0.629	0.606	0.539	3.922	1.079	1.313	0.328886
Q9Y5Y7	Lymphatic vessel endothelial hyaluronic acid receptor 1 OS=Homo sapiens OX=9606 GN=LYVE1 PE=1 SV=2	LYVE1	12	5	33	5	35.2	2.82223e+08	3.39914e+06	3.0963e+08	2.75651e+08	4.80439e+06	1.16752e+07	4.05677e+08	3.52504e+06	3.33692e+06	8.69738e+06	2.51072e+06	3.57818e+08	1.919	0.046	3.417	3.098	0.06	0.066	3.785	0.041	0.035	0.07	0.029	2.365	6.536	0.530333
P43121	Cell surface glycoprotein MUC18 OS=Homo sapiens OX=9606 GN=MCAM PE=1 SV=2	MCAM	5	3	18	3	71.6	2.1134e+06	2.01041e+06	1.41538e+06	1.85071e+06	811318	4.37474e+06	300671		362665	1.9243e+06	1.89184e+06	3.26674e+06	1.082	2.033	1.176	1.566	0.757	1.851	0.211		0.288	1.167	1.656	1.626	0.85	0.292716
P11177	Pyruvate dehydrogenase E1 component subunit beta, mitochondrial OS=Homo sapiens OX=9606 GN=PDHB PE=1 SV=3	PDHB	5	2	5	2	39.2	1.61502e+06	1.3318e+06	1.3023e+06	1.52323e+06			845665	1.54116e+06	1.64208e+06	1.54599e+06		637741	1.147	1.868	1.501	1.788			0.824	1.883	1.808	1.301		0.44	0.915	0.436741
P81172	Hepcidin OS=Homo sapiens OX=9606 GN=HAMP PE=1 SV=2	HAMP	19	1	2	1	9.4	2.18818e+06	2.14663e+06				2.79533e+06						1.14888e+06
Q8NDA2	Hemicentin-2 OS=Homo sapiens OX=9606 GN=HMCN2 PE=2 SV=3	HMCN2	0	1	1	1	541.6		353404	107089		291302	313323			138305		155536	513612
P01704	Immunoglobulin lambda variable 2-14 OS=Homo sapiens OX=9606 GN=IGLV2-14 PE=1 SV=2	IGLV2-14	28	8	295	1	12.6	1.71958e+08	8.17289e+07	6.20053e+07	6.76346e+07	1.6803e+08	4.43332e+08	1.43101e+08	7.4145e+07	4.30347e+07	7.06582e+07	1.54214e+08	2.07313e+08
Q16270	Insulin-like growth factor-binding protein 7 OS=Homo sapiens OX=9606 GN=IGFBP7 PE=1 SV=1	IGFBP7	56	13	134	13	29.1	2.77498e+07	1.04137e+07	1.45024e+07	2.88317e+07	1.06801e+07	7.22502e+07	2.37925e+07	1.02839e+07	2.0044e+07	2.36395e+07	1.19743e+07	8.82505e+07	0.92	0.682	0.78	1.58	0.645	1.979	1.082	0.586	1.03	0.928	0.679	2.843	1.072	0.840922
P05154	Plasma serine protease inhibitor OS=Homo sapiens OX=9606 GN=SERPINA5 PE=1 SV=3	SERPINA5	32	12	119	12	45.6	1.73792e+07	1.87575e+08	1.38862e+08	5.97534e+08	5.64354e+07	2.94967e+08	3.98388e+08	4.33463e+08	8.27112e+07	2.81963e+08	7.34456e+07	3.78876e+08	0.067	1.429	0.869	3.811	0.397	0.94	2.109	2.877	0.495	1.289	0.485	1.421	6.189	0.457179
P30085	UMP-CMP kinase OS=Homo sapiens OX=9606 GN=CMPK1 PE=1 SV=3	CMPK1	7	1	4	1	22.2	955656	165853	536419	373793	385732	1.42576e+06	365071	284727	601812	2875223	550643	1.38589e+06
A0A087WW87	Immunoglobulin kappa variable 2-40 OS=Homo sapiens OX=9606 GN=IGKV2-40 PE=3 SV=2	IGKV2-40	42	7	148	2	13.3	1.18999e+07	7.81551e+06	7.29455e+06	6.60969e+06	5.98742e+06	2.0021e+07	1.13875e+07	1.44069e+07	7.74554e+06	9.5463e+06	8.49331e+06	1.49635e+07	1.071	1.388	1.065	0.983	0.982	1.488	1.405	2.229	1.08	1.017	1.306	1.308	1.196	0.141755
O14745	Na(+)/H(+) exchange regulatory cofactor NHE-RF1 OS=Homo sapiens OX=9606 GN=SLC9A3R1 PE=1 SV=4	SLC9A3R1	9	3	12	3	38.8	3.97541e+08	4.09282e+08	3.88522e+08	6.45018e+08	4.13648e+08	5.68103e+08	3.61412e+08	6.474e+08	6.75986e+08	5.59831e+08	3.53101e+08	6.54286e+08	0.743	1.51	1.178	1.992	1.409	0.877	0.926	2.081	1.958	1.239	1.128	1.188	1.177	0.508066
Q9Y608	Leucine-rich repeat flightless-interacting protein 2 OS=Homo sapiens OX=9606 GN=LRRFIP2 PE=1 SV=1	LRRFIP2	1	1	2	1	82.1	282468		290786		51632.8	527772			188096	561244		636213
Q13421	Mesothelin OS=Homo sapiens OX=9606 GN=MSLN PE=1 SV=2	MSLN	23	12	28	8	68.9	4.06945e+06	2.91444e+06	4.8742e+06	3.9536e+06	3.5791e+06	5.40718e+07	3.8346e+06	976795	4.17748e+06	294220	4.4687e+06	3.52363e+07	0.377	0.533	0.733	0.606	0.605	4.141	0.488	0.156	0.6	0.032	0.708	3.175	0.733	0.215694
Q9BSG0	Protease-associated domain-containing protein 1 OS=Homo sapiens OX=9606 GN=PRADC1 PE=1 SV=1	PRADC1	9	1	2	1	21
Q969H8	Myeloid-derived growth factor OS=Homo sapiens OX=9606 GN=MYDGF PE=1 SV=1	MYDGF	37	5	71	5	18.8	3.29114e+07	1.01929e+07	3.99688e+07	1.29295e+07	1.46541e+07	6.87986e+07	2.34564e+07	1.83874e+07	4.42385e+07	1.94801e+07	1.54505e+07	6.47387e+07	1.023	0.626	2.016	0.664	0.83	1.767	1	0.983	2.131	0.717	0.821	1.956	1.13	0.18866
P80297	Metallothionein-1X OS=Homo sapiens OX=9606 GN=MT1X PE=1 SV=1	MT1X	20	1	9	1	6.1	3.25554e+06		2.09204e+06			6.28044e+06			3.11211e+06
Q15063	Periostin OS=Homo sapiens OX=9606 GN=POSTN PE=1 SV=2	POSTN	4	4	8	4	93.3	2.46993e+06				1.59125e+06	1.12769e+07	945093		865168	1.26461e+06	1.01625e+06	8.48468e+06	0.67				0.786	2.526	0.351		0.364	0.406	0.471	2.236	0.669	0.113215
P24666	Low molecular weight phosphotyrosine protein phosphatase OS=Homo sapiens OX=9606 GN=ACP1 PE=1 SV=3	ACP1	7	1	2	1	18	1.09712e+06					947611						1.15224e+06
Q9GZP4	PITH domain-containing protein 1 OS=Homo sapiens OX=9606 GN=PITHD1 PE=1 SV=1	PITHD1	20	4	18	4	24.2	930776	479905	930536	137175	233079	5.65921e+06	1.0579e+06	312421	800665	1.08601e+06	197064	3.87611e+06	0.673	0.685	1.092	0.164	0.307	3.38	1.049	0.389	0.897	0.93	0.244	2.724	1.703	0.655976
P01133	Pro-epidermal growth factor OS=Homo sapiens OX=9606 GN=EGF PE=1 SV=2	EGF	9	9	23	9	133.9	2.23366e+07	1.14702e+07	2.12027e+07	3.287e+07	8.63562e+07	7.71713e+07	1.10849e+07	7.95621e+06	6.18172e+07	2.56984e+07	7.2904e+07	4.94459e+07	0.528	0.535	0.813	1.284	3.719	1.507	0.359	0.323	2.265	0.719	2.946	1.136	1.029	0.538647
Q9Y5Z4	Heme-binding protein 2 OS=Homo sapiens OX=9606 GN=HEBP2 PE=1 SV=1	HEBP2	36	7	48	7	22.9	2.48094e+07	1.45141e+07	1.35305e+07	1.44721e+07	2.2036e+07	4.32183e+07	2.73548e+07	1.54049e+07	1.14736e+07	1.73626e+07	2.10904e+07	2.9745e+07	1.104	1.276	0.977	1.065	1.788	1.589	1.67	1.179	0.792	0.915	1.605	1.287	0.969	0.577466
P00492	Hypoxanthine-guanine phosphoribosyltransferase OS=Homo sapiens OX=9606 GN=HPRT1 PE=1 SV=2	HPRT1	5	1	1	1	24.6	1.25675e+06
Q96RW7	Hemicentin-1 OS=Homo sapiens OX=9606 GN=HMCN1 PE=1 SV=2	HMCN1	1	4	20	4	613		3.41082e+06	3.03472e+06	1.00293e+07	1.09643e+06	9.88059e+06	4.35183e+06	2.57887e+06	160355	1.23093e+07	3.85739e+06	8.32123e+06		1.187	0.868	2.922	0.352	1.439	1.052	0.782	0.044	2.57	1.162	1.426	1.176	0.532144
Q9BUJ2	Heterogeneous nuclear ribonucleoprotein U-like protein 1 OS=Homo sapiens OX=9606 GN=HNRNPUL1 PE=1 SV=2	HNRNPUL1	4	3	3	3	95.7	1.58818e+07	1.37792e+07	1.59453e+07	1.51266e+07	1.50831e+07	4.98608e+06	1.98953e+07	1.98145e+07	1.98597e+07	2.58191e+07	1.26208e+07	1.28575e+07	0.941	1.611	1.532	1.48	1.628	0.244	1.616	2.018	1.823	1.811	1.278	0.74	1.534	0.130668
Q14103	Heterogeneous nuclear ribonucleoprotein D0 OS=Homo sapiens OX=9606 GN=HNRNPD PE=1 SV=1	HNRNPD	15	5	6	4	38.4	1.7812e+07					1.46166e+06						1.4799e+06	2.435					0.165						0.197	1.194
P61978	Heterogeneous nuclear ribonucleoprotein K OS=Homo sapiens OX=9606 GN=HNRNPK PE=1 SV=1	HNRNPK	23	10	15	3	50.9	2.57569e+07	12927.9	1.89866e+06		1.2476e+06	883538	1.81296e+06		15825.2	804788	1.08753e+06	1.87375e+06	6.883	0.007	0.823		0.608	0.195	0.665		0.007	0.255	0.497	0.487	0.855	0.292247
A0A0C4DH24	Immunoglobulin kappa variable 6-21 OS=Homo sapiens OX=9606 GN=IGKV6-21 PE=3 SV=1	IGKV6-21	29	2	14	1	12.4				6.43382e+06						6326696
P58546	Myotrophin OS=Homo sapiens OX=9606 GN=MTPN PE=1 SV=2	MTPN	8	1	2	1	12.9	643779									385155	1.23958e+06	738754
P23083	Immunoglobulin heavy variable 1-2 OS=Homo sapiens OX=9606 GN=IGHV1-2 PE=1 SV=2	IGHV1-2	33	8	176	1	13.1	1.00507e+06	531411	3.56992e+06	2.01866e+07		1.66766e+07	621470	604701	530641	2.02293e+07		1.35024e+06
A0A075B6K2	Immunoglobulin lambda variable 3-12 OS=Homo sapiens OX=9606 GN=IGLV3-12 PE=3 SV=2	IGLV3-12	30	4	31	1	12.4	2.62034e+06				2.27518e+06	2.96207e+06	1.51123e+06			1.23696e+06	4.76507e+06	794793
A0A0A0MS14	Immunoglobulin heavy variable 1-45 OS=Homo sapiens OX=9606 GN=IGHV1-45 PE=3 SV=1	IGHV1-45	26	4	76	1	13.5	3.65684e+06				2.65562e+06	1.57184e+06	2.65741e+06		1.45715e+06	676802	3.85281e+06	2.10162e+06
Q68E01	Integrator complex subunit 3 OS=Homo sapiens OX=9606 GN=INTS3 PE=1 SV=1	INTS3	1	1	2	1	118										3540517
P13646	Keratin, type I cytoskeletal 13 OS=Homo sapiens OX=9606 GN=KRT13 PE=1 SV=4	KRT13	67	42	187	30	49.6	5.83037e+07	5.22872e+07	4.18129e+07	5.26249e+07	4.49292e+07	7.47191e+07	6.10584e+07	5.02709e+07	6.16127e+07	5.31899e+09	4.43405e+07	7.55757e+07	0.111	0.197	0.13	0.166	0.157	0.118	0.16	0.165	0.183	12.047	0.145	0.14	13.061	0.29486
Q8WWU7	Intelectin-2 OS=Homo sapiens OX=9606 GN=ITLN2 PE=2 SV=1	ITLN2	20	6	21	2	36.2												1.53883e+06												0.919
Q9UKR3	Kallikrein-13 OS=Homo sapiens OX=9606 GN=KLK13 PE=2 SV=1	KLK13	20	5	11	5	30.6	1.49017e+06		1.32786e+06	1.16674e+07		1.48557e+06			891034	52881930		369305	0.141		0.203	1.821		0.116			0.13	5.916		0.034	1.394	0.837623
A0A075B6R9	Probable non-functional immunoglobulin kappa variable 2D-24 OS=Homo sapiens OX=9606 GN=IGKV2D-24 PE=1 SV=1	IGKV2D-24	11	1	13	1	13.1	7.51203e+07	2.66443e+07	1.80896e+07	4.45969e+07	1.85765e+07	7.63836e+07	4.64984e+07	4.32846e+07	1.75321e+07	4.83337e+07	5.14257e+07	6.07077e+07
P29622	Kallistatin OS=Homo sapiens OX=9606 GN=SERPINA4 PE=1 SV=3	SERPINA4	54	19	233	19	48.5	3.82889e+07	9.16456e+07	1.70562e+08	1.78053e+08	3.27232e+08	2.71905e+08	2.4042e+08	1.24736e+08	6.74186e+07	2.3294e+08	5.35972e+08	3.87641e+08	0.163	0.77	1.178	1.252	2.538	0.956	1.404	0.913	0.445	1.174	3.9	1.604	2.388	0.41396
P62805	Histone H4 OS=Homo sapiens OX=9606 GN=H4C1 PE=1 SV=2	H4C1	51	9	61	9	11.4	5.55977e+08	1.66721e+07	4.6088e+07	1.11671e+07	1.90984e+07	5.02595e+07	2.87168e+07	2.2493e+07	6.62488e+07	3.23535e+08	1.84105e+07	5.43749e+07	5.202	0.308	0.7	0.173	0.326	0.389	0.369	0.362	0.961	3.586	0.295	0.495	4.254	0.828814
Q99538	Legumain OS=Homo sapiens OX=9606 GN=LGMN PE=1 SV=1	LGMN	11	4	13	4	49.4	1.264e+06		3.34591e+06	448943		7.71475e+06	540068	1.0148e+06	3.10359e+06	870625		4.12797e+06	0.48		2.06	0.282		2.419	0.281	0.662	1.826	0.391		1.523	0.872	0.388799
P09960	Leukotriene A-4 hydrolase OS=Homo sapiens OX=9606 GN=LTA4H PE=1 SV=2	LTA4H	3	2	3	2	69.2
P48637	Glutathione synthetase OS=Homo sapiens OX=9606 GN=GSS PE=1 SV=1	GSS	4	2	5	2	52.4		436323		290081	143877	1.02365e+06	310234	407798	297928	385887	520151	106405		2.078		1.156	0.632	2.04	1.026	1.692	1.114	1.102	2.145	0.249	1.321	0.706856
P05198	Eukaryotic translation initiation factor 2 subunit 1 OS=Homo sapiens OX=9606 GN=EIF2S1 PE=1 SV=3	EIF2S1	3	1	2	1	36.1						3.92246e+06						2.53771e+06
P02538	Keratin, type II cytoskeletal 6A OS=Homo sapiens OX=9606 GN=KRT6A PE=1 SV=3	KRT6A	60	49	194	5	60	5.39143e+09	1.04169e+08	4.63494e+08	3.25595e+08	3.668e+09	7.68892e+08	2.16309e+09	2.2457e+08	7.75638e+08	3.97288e+09	1.85638e+09	7.26924e+08	2.994	0.114	0.418	0.299	3.712	0.353	1.648	0.214	0.668	2.613	1.762	0.392	2.392	0.467428
Q9NPH2	Inositol-3-phosphate synthase 1 OS=Homo sapiens OX=9606 GN=ISYNA1 PE=1 SV=1	ISYNA1	2	1	13	1	61	1.2354e+06	919415	805185	1.60148e+06	1.07128e+06	399695	751277	709121	846711	444012	1.14995e+06	752319
Q9BZV3	Interphotoreceptor matrix proteoglycan 2 OS=Homo sapiens OX=9606 GN=IMPG2 PE=1 SV=3	IMPG2	1	1	9	1	138.5	3.09594e+06	3.06872e+06	5.70642e+06	4.84162e+06	4.04865e+06	2.02296e+06	4.69625e+06		3.16885e+06		2.76322e+06	1.82477e+06
Q14624	Inter-alpha-trypsin inhibitor heavy chain H4 OS=Homo sapiens OX=9606 GN=ITIH4 PE=1 SV=4	ITIH4	53	62	1172	18	103.3	2.55807e+09	1.62846e+09	1.64455e+09	1.24321e+09	1.89844e+09	2.34753e+09	2.30206e+09	1.73219e+09	1.577e+09	1.67111e+09	1.8336e+09	1.86175e+09	1.302	1.637	1.358	1.046	1.761	0.987	1.607	1.517	1.244	1.008	1.596	0.921	0.98	0.60786
P54819	Adenylate kinase 2, mitochondrial OS=Homo sapiens OX=9606 GN=AK2 PE=1 SV=2	AK2	22	4	7	4	26.5	4.65422e+06					1.07402e+06				181662		1.16657e+06	2.488					0.474				0.115		0.606	1.278
Q9UNW1	Multiple inositol polyphosphate phosphatase 1 OS=Homo sapiens OX=9606 GN=MINPP1 PE=1 SV=1	MINPP1	6	2	10	2	55	924060	831378	1.51619e+06	1.04594e+06	2.62874e+06	3.96536e+06	948631	1.45513e+06	881742	1.41184e+06	2.85009e+06	3.01625e+06	0.488	0.868	1.3	0.914	2.532	1.732	0.688	1.323	0.722	0.884	2.576	1.55	1.061	0.957478
Q8WW52	Protein FAM151A OS=Homo sapiens OX=9606 GN=FAM151A PE=2 SV=2	FAM151A	4	2	5	2	64			368162			394399			1.03349e+06			230223			1.115			0.609			2.992			0.418	1.685	0.731887
P00488	Coagulation factor XIII A chain OS=Homo sapiens OX=9606 GN=F13A1 PE=1 SV=4	F13A1	2	2	3	2	83.2	181710		1.13989e+06	2.10192e+06	641328	2.24861e+06	1.16995e+06	1.25818e+06	232575	4.38306e+06	1.0511e+06	1.7701e+06	0.117		1.19	2.234	0.752	1.195	1.032	1.392	0.232	3.339	1.156	1.106	2.595	0.69238
Q9UI08	Ena/VASP-like protein OS=Homo sapiens OX=9606 GN=EVL PE=1 SV=2	EVL	5	1	1	1	44.6
Q15375	Ephrin type-A receptor 7 OS=Homo sapiens OX=9606 GN=EPHA7 PE=1 SV=3	EPHA7	5	3	7	3	112	792451	266708	298286	831343		1.24888e+06	592853	563668	335576	901794	120721	455164	1.287	0.855	0.786	2.231		1.676	1.321	1.574	0.845	1.735	0.335	0.718	1.03	0.758984
O95967	EGF-containing fibulin-like extracellular matrix protein 2 OS=Homo sapiens OX=9606 GN=EFEMP2 PE=1 SV=3	EFEMP2	26	8	19	8	49.4	1.85552e+06	1.30375e+06	1.3093e+06	2.24476e+06	1.05065e+06	1.09784e+07	1.63114e+06		1.07709e+06	3.83121e+06	1.12667e+06	5.64508e+06	0.602	0.836	0.69	1.204	0.622	2.945	0.726		0.542	1.473	0.625	1.781	0.965	0.629937
Q6ZN66	Guanylate-binding protein 6 OS=Homo sapiens OX=9606 GN=GBP6 PE=2 SV=1	GBP6	13	8	8	8	72.4	4.88224e+06	2.38925e+06		197494	3.72393e+06	913946	8.50535e+06	4.29162e+06	1.9045e+06	9763051	231313	1.75796e+06	1.317	1.273		0.088	1.831	0.204	3.148	1.992	0.797	3.121	0.107	0.461	8.348	0.604275
P32456	Guanylate-binding protein 2 OS=Homo sapiens OX=9606 GN=GBP2 PE=1 SV=3	GBP2	3	1	3	1	67.2	166589			64040.1						348992
P05546	Heparin cofactor 2 OS=Homo sapiens OX=9606 GN=SERPIND1 PE=1 SV=3	SERPIND1	48	21	276	20	57	1.38793e+08	1.05585e+08	1.77027e+08	1.86809e+08	5.07649e+08	2.58402e+08	3.39498e+08	1.38796e+08	1.39563e+08	2.91456e+08	7.33651e+08	3.84317e+08	0.463	0.696	0.959	1.03	3.087	0.712	1.554	0.797	0.722	1.152	4.186	1.246	1.58	0.162365
O76009	Keratin, type I cuticular Ha3-I OS=Homo sapiens OX=9606 GN=KRT33A PE=2 SV=2	KRT33A	6	2	10	1	45.9
O15230	Laminin subunit alpha-5 OS=Homo sapiens OX=9606 GN=LAMA5 PE=1 SV=8	LAMA5	1	1	2	1	399.5
Q96GX9	Methylthioribulose-1-phosphate dehydratase OS=Homo sapiens OX=9606 GN=APIP PE=1 SV=1	APIP	3	1	22	1	27.1	3.18421e+07	7.35174e+07	3.19138e+07	4.94849e+07	4.09606e+07	1.83103e+07	4.17399e+07	6.28253e+07	4.63359e+07	51276220	5.33659e+07	4.022e+07
Q9ULI3	Protein HEG homolog 1 OS=Homo sapiens OX=9606 GN=HEG1 PE=1 SV=3	HEG1	3	4	7	4	147.4	281028	891188	507306	662238	231587	7.04612e+06	390312	554082	375595	1.22699e+06	310626	6.65907e+06	0.167	1.044	0.488	0.649	0.25	3.453	0.318	0.565	0.345	0.862	0.315	3.839	1.142	0.796449
P06865	Beta-hexosaminidase subunit alpha OS=Homo sapiens OX=9606 GN=HEXA PE=1 SV=2	HEXA	13	8	29	7	60.7	1.33745e+07	4.92732e+06	2.58536e+07	3.23758e+07	5.3043e+06	1.31664e+07	4.63738e+06	1.06166e+07	1.79205e+07	2.97174e+06	5.11244e+06	7.90213e+06	1.053	0.766	3.303	4.213	0.761	0.857	0.501	1.438	2.187	0.277	0.688	0.605	0.782	0.239224
P08833	Insulin-like growth factor-binding protein 1 OS=Homo sapiens OX=9606 GN=IGFBP1 PE=1 SV=1	IGFBP1	15	6	52	6	27.9	4.27936e+07	4.00904e+06	2.02992e+07	1.35101e+07	1.46024e+06	4.51186e+07	5.43605e+07	1.12953e+07	1.42473e+07	2.81756e+06	5.89001e+06	3.46196e+07	1.94	0.359	1.493	1.012	0.121	1.69	3.38	0.881	1.001	0.151	0.456	1.525	1.614	0.899577
P05783	Keratin, type I cytoskeletal 18 OS=Homo sapiens OX=9606 GN=KRT18 PE=1 SV=2	KRT18	7	4	12	3	48	2.17318e+06	3.63857e+06	3.85875e+06	852657	3.79373e+06	4.77307e+06	2.94597e+06	3.32289e+06	4.61559e+06	3.72761e+06	4.28214e+06	5.48116e+06	0.568	1.876	1.635	0.368	1.806	1.03	1.055	1.493	1.869	1.153	1.912	1.391	1.556	0.148061
O43240	Kallikrein-10 OS=Homo sapiens OX=9606 GN=KLK10 PE=1 SV=3	KLK10	15	4	28	4	30.2	1.33384e+07	5.68763e+06	4.78876e+06	3.31309e+06	1.03899e+07	9.76556e+06	1.73543e+07	6.55906e+06	5.36038e+06	3.29688e+07	1.49127e+07	7.22664e+06	1.15	0.968	0.67	0.472	1.632	0.696	2.052	0.973	0.716	3.367	2.198	0.606	2.202	0.205069
Q5T5B0	Late cornified envelope protein 3E OS=Homo sapiens OX=9606 GN=LCE3E PE=1 SV=1	LCE3E	37	1	1	1	9.5
O00462	Beta-mannosidase OS=Homo sapiens OX=9606 GN=MANBA PE=1 SV=3	MANBA	4	4	16	3	100.8	2.87782e+06	2.60334e+06	1.94018e+06	2.55348e+06	2.19632e+06	4.3753e+06	2.02294e+06	2.86649e+06	2.03071e+06	1.84392e+06	2.3245e+06	2.1793e+06	1.096	1.957	1.199	1.607	1.524	1.376	1.056	1.877	1.198	0.832	1.513	0.806	0.836	0.141781
P55145	Mesencephalic astrocyte-derived neurotrophic factor OS=Homo sapiens OX=9606 GN=MANF PE=1 SV=3	MANF	8	1	2	1	20.7	4.03982e+06					3.37197e+06	5.33662e+06		2.03056e+06	2.97745e+06	1.72135e+06	3.60969e+06
O15264	Mitogen-activated protein kinase 13 OS=Homo sapiens OX=9606 GN=MAPK13 PE=1 SV=1	MAPK13	3	1	1	1	42.1									349100	432853		145566
P08493	Matrix Gla protein OS=Homo sapiens OX=9606 GN=MGP PE=1 SV=2	MGP	11	2	10	2	12.3	1.32144e+07	6.38234e+06	9.66882e+06	8.38631e+06	1.61588e+07	7.22661e+07	1.44722e+07	1.04355e+07	1.02905e+07	1.68432e+07	1.58001e+07	7.49921e+07	0.558	0.532	0.662	0.585	1.243	2.52	0.838	0.758	0.673	0.842	1.14	3.077	1.253	0.054015
Q6UX06	Olfactomedin-4 OS=Homo sapiens OX=9606 GN=OLFM4 PE=1 SV=1	OLFM4	6	3	8	3	57.2	7.20711e+06	8.25785e+06		736692	2.26702e+06	6.86043e+06		1.25852e+07	4.52223e+06	917032	1.26582e+06	975623	1.495	3.383		0.253	0.857	1.176		4.491	1.454	0.225	0.449	0.197	0.727	0.296048
O14773	Tripeptidyl-peptidase 1 OS=Homo sapiens OX=9606 GN=TPP1 PE=1 SV=2	TPP1	41	16	114	16	61.2	6.32134e+07	4.62238e+07	6.21119e+07	6.44565e+07	3.7496e+07	5.46899e+07	3.54463e+07	5.40794e+07	5.6488e+07	4.21129e+07	3.82952e+07	4.14315e+07	1.204	1.738	1.919	2.029	1.301	0.861	0.926	1.771	1.668	0.95	1.247	0.767	0.829	0.118524
Q8WUA8	Tsukushi OS=Homo sapiens OX=9606 GN=TSKU PE=1 SV=3	TSKU	8	2	4	2	37.8	706201		622321			2.38933e+06	2.94355e+06		756366		818400	4.57973e+06	0.365		0.522			1.02	2.086		0.606		0.723	2.3	3.044	0.190351
Q86UX7	Fermitin family homolog 3 OS=Homo sapiens OX=9606 GN=FERMT3 PE=1 SV=1	FERMT3	7	5	5	5	75.9	4.57346e+06		177915	1.35526e+06	798030	869531	264003		141736	26332944	615154	967930	1.198		0.076	0.587	0.381	0.188	0.095		0.058	8.174	0.276	0.247	3.361	0.959902
O14933	Ubiquitin/ISG15-conjugating enzyme E2 L6 OS=Homo sapiens OX=9606 GN=UBE2L6 PE=1 SV=4	UBE2L6	5	1	4	1	17.8	1.08994e+06		1.0633e+06		534956	2.96599e+06					473514
P35443	Thrombospondin-4 OS=Homo sapiens OX=9606 GN=THBS4 PE=1 SV=2	THBS4	12	8	26	6	105.8	694744		680246	585179	1.1544e+06	3.29766e+07	693778	1.96988e+06	441560	1.96405e+06	2.07731e+06	8.9915e+07	0.054		0.086	0.076	0.164	2.129	0.074	0.265	0.053	0.182	0.278	6.829	1.857	0.163556
P07996	Thrombospondin-1 OS=Homo sapiens OX=9606 GN=THBS1 PE=1 SV=2	THBS1	7	7	12	7	129.3			376019			1.46004e+07	549509		1.81148e+06		256233	2.19287e+07			0.088			1.732	0.108		0.403		0.063	3.061	3.173	0.272016
P78371	T-complex protein 1 subunit beta OS=Homo sapiens OX=9606 GN=CCT2 PE=1 SV=4	CCT2	4	2	2	2	57.5	4.83339e+06		746607				807399					3.34512e+06	1.879		0.471				0.431					1.264	0.229
Q9UMX0	Ubiquilin-1 OS=Homo sapiens OX=9606 GN=UBQLN1 PE=1 SV=2	UBQLN1	3	1	2	1	62.5						584102
P18206	Vinculin OS=Homo sapiens OX=9606 GN=VCL PE=1 SV=4	VCL	10	9	29	9	123.7	5.0598e+06	55466.4	2.37708e+06	1.54633e+06	8.29185e+06	7.49926e+06	2.48044e+06	1.09139e+06	7.5694e+06	1.44364e+07	8.22847e+06	5.41604e+06	0.897	0.019	0.684	0.453	2.678	1.098	0.603	0.333	2.079	3.03	2.493	0.933	4.951	0.164587
P22735	Protein-glutamine gamma-glutamyltransferase K OS=Homo sapiens OX=9606 GN=TGM1 PE=1 SV=4	TGM1	8	6	6	6	89.7		1.56466e+06	1.31721e+06					1.23776e+06		7095855	975109			1.199	0.829					0.826		3.261	0.647		0.689
Q08188	Protein-glutamine gamma-glutamyltransferase E OS=Homo sapiens OX=9606 GN=TGM3 PE=1 SV=4	TGM3	28	16	24	16	76.6	3.96664e+06	386503	3.93428e+06	7.83148e+06	1.49876e+06	2.29115e+06	2.90931e+06		1.97437e+06	7.26191e+07	2.25212e+06	3.27087e+06	0.401	0.077	0.645	1.308	0.276	0.191	0.403		0.309	8.695	0.389	0.321	2.244	0.399361
P08670	Vimentin OS=Homo sapiens OX=9606 GN=VIM PE=1 SV=4	VIM	29	14	59	13	53.6	2.01685e+06	2.08165e+06	3.40926e+06	932668	4.95345e+06	1.82381e+07	3.66199e+06	1.61618e+06	3.92049e+06	8.97346e+06	5.71593e+06	1.2894e+07	0.335	0.682	0.918	0.256	1.498	2.5	0.833	0.461	1.008	1.764	1.621	2.079	2.177	0.303523
Q9Y490	Talin-1 OS=Homo sapiens OX=9606 GN=TLN1 PE=1 SV=3	TLN1	4	8	26	8	269.6	4.3642e+06	339807	236751	253754	552118	1.84001e+06	1.82901e+06	105708	910005	375313	378377	1.07641e+06	4.04	0.621	0.356	0.388	0.932	1.407	2.322	0.168	1.306	0.412	0.599	0.969	1.151	0.562317
Q86YW5	Trem-like transcript 1 protein OS=Homo sapiens OX=9606 GN=TREML1 PE=1 SV=2	TREML1	5	1	2	1	32.7
O75347	Tubulin-specific chaperone A OS=Homo sapiens OX=9606 GN=TBCA PE=1 SV=3	TBCA	48	6	18	6	12.8	6.15114e+06	318977	398880	547319	341281	1.17239e+07	3.60353e+06	506061	317586	1.45035e+06	1.82399e+06	1.20461e+07	1.78	0.182	0.187	0.262	0.18	2.803	1.43	0.252	0.142	0.497	0.902	3.388	1.844	0.239182
Q99727	Metalloproteinase inhibitor 4 OS=Homo sapiens OX=9606 GN=TIMP4 PE=2 SV=1	TIMP4	6	1	1	1	25.5
P05452	Tetranectin OS=Homo sapiens OX=9606 GN=CLEC3B PE=1 SV=3	CLEC3B	39	7	106	7	22.5	1.6754e+07	9.22766e+06	1.14647e+07	2.07308e+07	1.14288e+08	2.56442e+08	1.68765e+07	1.1095e+07	1.82162e+07	2.16862e+07	1.41415e+08	3.97702e+08	0.184	0.2	0.204	0.375	2.282	2.322	0.254	0.209	0.309	0.281	2.649	4.236	1.279	0.164974
Q8WZ42	Titin OS=Homo sapiens OX=9606 GN=TTN PE=1 SV=4	TTN	0	5	54	5	3813.7	6.87411e+06	1.91295e+07	1.97961e+07	2.89636e+07	1.10102e+07	1.22596e+07	1.48807e+07	2.00466e+07	1.4345e+07	3.6481e+07	1.93083e+07	2.22364e+07	0.346	1.903	1.618	2.411	1.011	0.51	1.028	1.737	1.12	2.177	1.663	1.089	1.543	0.25848
Q13263	Transcription intermediary factor 1-beta OS=Homo sapiens OX=9606 GN=TRIM28 PE=1 SV=5	TRIM28	3	2	2	2	88.5	1.7041e+06					3.17711e+06						3.58735e+06	0.571					0.88						1.168	1.327
Q9BZJ3	Tryptase delta OS=Homo sapiens OX=9606 GN=TPSD1 PE=2 SV=2	TPSD1	10	2	10	1	26.6						872142	1.45429e+06					1.06496e+06
Q99805	Transmembrane 9 superfamily member 2 OS=Homo sapiens OX=9606 GN=TM9SF2 PE=1 SV=1	TM9SF2	3	1	1	1	75.7
P60174	Triosephosphate isomerase OS=Homo sapiens OX=9606 GN=TPI1 PE=1 SV=4	TPI1	53	9	48	9	26.7	2.42657e+07	2.47163e+06	1.22603e+07	6.43715e+06	2.81007e+06	6.63266e+06	1.34045e+06	1.66015e+06	1.27362e+07	2.39956e+07	3.28085e+06	4.66382e+06	2.686	0.54	2.202	1.177	0.567	0.607	0.204	0.316	2.185	3.146	0.621	0.502	1.041	0.47829
P21333	Filamin-A OS=Homo sapiens OX=9606 GN=FLNA PE=1 SV=4	FLNA	10	18	70	15	280.6	4.36261e+06	423110	3.91123e+06	2.25666e+06	3.22246e+06	2.31995e+07	9.52039e+06	2.22254e+06	2.68989e+06	3.12788e+06	2.92504e+06	1.47233e+07	0.682	0.131	0.992	0.583	0.918	2.998	2.042	0.598	0.652	0.579	0.782	2.238	1.801	0.422532
P35754	Glutaredoxin-1 OS=Homo sapiens OX=9606 GN=GLRX PE=1 SV=2	GLRX	21	2	17	2	11.8	1.74609e+07	1.35151e+07	2.04901e+07	3.30841e+06	1.05532e+07	3.90612e+07	1.75307e+07	1.38802e+07	1.72622e+07	8.1356e+06	8.2565e+06	2.276e+07	1.031	1.576	1.963	0.323	1.136	1.906	1.42	1.41	1.58	0.569	0.834	1.306	1.043	0.894857
Q5QNW6	Histone H2B type 2-F OS=Homo sapiens OX=9606 GN=H2BC18 PE=1 SV=3	H2BC18	48	10	74	10	13.9	1.6767e+08	736885	7.14567e+06	933933	1.88588e+06	5.82137e+06	3.16249e+06	1.34131e+06	1.20464e+07	9.43025e+07	1.77494e+06	1.13152e+07	6.176	0.054	0.427	0.057	0.127	0.177	0.16	0.085	0.688	4.115	0.112	0.405	13.096	0.730155
P05204	Non-histone chromosomal protein HMG-17 OS=Homo sapiens OX=9606 GN=HMGN2 PE=1 SV=3	HMGN2	13	1	4	1	9.4	2.61668e+06			177819						1.04567e+06		188216
P46940	Ras GTPase-activating-like protein IQGAP1 OS=Homo sapiens OX=9606 GN=IQGAP1 PE=1 SV=1	IQGAP1	2	3	4	3	189.1	643364					1.81688e+06				3.0065e+06	318718	1.49899e+06	0.418					0.975				2.312	0.354	0.946	0.97
[truncated: 149 more rows]
