# Supplementary material for: Integrated proteomic and metabolomic profiling of urine of renal anemia patients uncovers the molecular mechanisms of roxadustat
Source: Royal Society of Chemistry journal article supplement (doi:10.1039/d3mo00015j), 2023-03-20
Supplement: d3mo00015j2.xlsx [file d3mo00015j2.xlsx]

## Sheet: Protein_Result
Protein accession	Protein description	Gene name	F_U1 Relative Abundance	F_U2 Relative Abundance	F_U3 Relative Abundance	F_U4 Relative Abundance	F_U5 Relative Abundance	F_U7 Relative Abundance	F_U6 Relative Abundance	F_U8 Relative Abundance	P_U1 Relative Abundance	P_U2 Relative Abundance	P_U3 Relative Abundance	P_U4 Relative Abundance	P_U5 Relative Abundance	P_U7 Relative Abundance	P_U6 Relative Abundance	P_U8 Relative Abundance	P_U/F_U Ratio PRM	P_U/F_U Ratio PRO
E7EQB2	Lactotransferrin (Fragment) OS=Homo sapiens OX=9606 GN=LTF PE=1 SV=1	LTF	0.59	0.27	0.97	0.22	0.32	1.64	0.45	0.67	0.45	0.61	1.6	0.74	0.32	1.54	0.51	5.12	2.12	2.29
P02750	Leucine-rich alpha-2-glycoprotein OS=Homo sapiens OX=9606 GN=LRG1 PE=1 SV=2	LRG1	1.49	0.46	1.64	1.27	1.77	1.32	0.59	1.22	0.76	0.64	0.49	0.78	0.85	1.15	0.59	0.98	0.64	0.52
P10645	Chromogranin-A OS=Homo sapiens OX=9606 GN=CHGA PE=1 SV=7	CHGA	0.94	0.59	1.04	0.74	1.13	0.65	1.27	0.88	0.91	1.83	1.17	1.49	0.7	0.66	1.3	0.7	1.21	1.61
Q6UXB8	Peptidase inhibitor 16 OS=Homo sapiens OX=9606 GN=PI16 PE=1 SV=1	PI16	0.26	0.47	0.25	0.99	0.49	4.57	0.47	1.5	0.12	0.4	0.1	0.4	0.46	4.11	0.24	1.18	0.78	0.66
Q7Z5L0	Vitelline membrane outer layer protein 1 homolog OS=Homo sapiens OX=9606 GN=VMO1 PE=1 SV=1	VMO1	0.34	0.26	1.06	2.46	0.65	3.02	0.22	0.99	0.65	0.24	0.4	1.03	0.62	1.06	0.13	2.86	0.78	0.58
Q99969	Retinoic acid receptor responder protein 2 OS=Homo sapiens OX=9606 GN=RARRES2 PE=1 SV=1	RARRES2	0.3	0.34	0.3	0.38	2.03	1.1	1.33	1.15	0.57	0.42	0.18	0.62	1.73	0.64	2.76	2.14	1.3	2.28
