# Supplementary material for: Integrated proteomic and metabolomic profiling of urine of renal anemia patients uncovers the molecular mechanisms of roxadustat
Source: Royal Society of Chemistry journal article supplement (doi:10.1039/d3mo00015j), 2023-03-20
Supplement: d3mo00015j3.xlsx [file d3mo00015j3.xlsx]

## Sheet: Sheet1
name	ID	mz	rt	ppm	formula	KEGG	P_U_Mean	P_U_Median	P_U_RSD	F_U_Mean	F_U_Median	F_U_RSD	FC	log2FC	P.value	-log10(P.value)	FDR	VIP	posneg
Cyclohexylamine	M100T279_2	100.112	279	2.99663	C6H13N	C00571	1.05572e+08	3.55242e+07	168.34	2.87497e+08	9.05578e+07	173.18	0.37	-1.45	0.24023	0.62	0.51495	0.825873	pos
N-Methyl-2-pyrrolidinone	M100T308	100.076	308.4	2.2383	C5H9NO	C11118	2.4681e+09	2.64245e+09	76.94	1.68247e+09	1.49989e+09	76.62	1.47	0.55	0.660064	0.18	0.841232	0.235929	pos
Indole	M100T83	100.051	82.6	4.3378	C8H7N	C00463	2.71955e+08	2.18043e+08	64.32	3.14553e+08	2.68969e+08	60.34	0.86	-0.21	0.551109	0.26	0.771924	0.35009	pos
Gyromitrin	M101T829	101.071	829.3	0.237457	C4H8N2O	C08305	9.06905e+06	8.2012e+06	53.37	5.85327e+06	5.64664e+06	62.98	1.55	0.63	0.195268	0.71	0.467588	0.886448	pos
5-Aminopentanal	M102T321	102.092	321.1	0.388242	C5H11NO	C12455	8.8623e+08	3.45655e+08	151.35	5.82708e+07	4.87972e+07	43.89	15.21	3.93	0.00270543	2.57	0.036963	1.86847	pos
Isovaleric acid	M102T37	102.092	37.2	0.716698	C5H10O2	C08262	1.94305e+08	1.70611e+08	50.1	1.02059e+08	1.02713e+08	31.26	1.9	0.93	0.0256696	1.59	0.150185	1.43421	pos
Valeric acid	M102T56	102.055	55.8	0.0130377	C5H10O2	C00803	6.86851e+07	6.27019e+07	60.43	1.63986e+08	1.7415e+08	36.55	0.42	-1.26	0.0125634	1.9	0.0983733	1.51322	pos
(R)-Methylmalonate semialdehyde	M102T66_4	102.022	65.9	4.80913	C4H6O3	C21030	5.89116e+08	5.5918e+08	33.09	9.08417e+08	9.32678e+08	34.93	0.65	-0.62	0.0616975	1.21	0.248727	1.24414	pos
2-Methyl-3-oxopropanoic acid	M103T198	103.039	197.7	3.14443	C4H6O3	C00349	2.21902e+07	1.53965e+07	85.8	1.83104e+08	4.77802e+07	172.54	0.12	-3.04	0.0337174	1.47	0.176544	1.32343	pos
Choline	M104T151	104.107	151.2	0.000216853	C5H14NO	C00114	1.21186e+08	1.14068e+08	56.09	5.64978e+07	6.00541e+07	28.59	2.14	1.1	0.0207194	1.68	0.134459	1.45002	pos
Dimethylglycine	M104T305	104.071	304.5	0.0435089	C4H9NO2	C01026	1.02764e+08	9.42831e+07	78.8	1.39366e+08	9.51066e+07	94.68	0.74	-0.44	0.612473	0.21	0.810828	0.377082	pos
Hydroxypyruvic acid	M104T32	104.108	32.3	5.47572	C3H4O4	C00168	1.91705e+08	1.23563e+08	97.76	1.46914e+08	1.42538e+08	24.37	1.3	0.38	0.896796	0.05	0.95796	0.0819757	pos
L-alpha-Aminobutyric acid	M104T807	104.07	807.1	1.69116	C4H9NO2	C02356	7.39585e+08	7.53251e+08	27.66	1.66771e+10	1.36945e+10	79.09	0.04	-4.5	0.0016427	2.78	0.0260758	1.9658	pos
Diethanolamine	M106T85	106.087	85.1	0.0118519	C4H11NO2	C06772	1.78749e+08	1.92028e+08	53.81	2.10452e+08	2.18702e+08	22.37	0.85	-0.24	0.335477	0.47	0.609976	0.671571	pos
Benzaldehyde	M107T366	107.049	366.2	0	C7H6O	C00261	2.53044e+07	2.5425e+07	21.65	3.92327e+07	3.64417e+07	47.01	0.64	-0.63	0.115621	0.94	0.357378	1.12001	pos
Benzylamine	M108T772	108.081	771.7	0.0118591	C7H9N	C15562	7.73998e+07	7.93446e+07	30.67	4.58219e+08	4.12982e+08	51.11	0.17	-2.57	8.19934e-05	4.09	0.00396954	1.994	pos
p-Cresol	M109T469	109.065	468.8	2.97071	C7H8O	C01468	3.91032e+07	3.24288e+07	65.13	1.83879e+08	6.19471e+07	151.12	0.21	-2.23	0.194875	0.71	0.46753	0.95131	pos
m-Cresol	M109T732	109.101	731.6	1.49694	C7H8O	C01467	3.04013e+07	2.8031e+07	54.7	2.49467e+07	2.68643e+07	54.56	1.22	0.29	0.500833	0.3	0.740727	0.490039	pos
4-Aminophenol	M110T204	110.061	204.4	4.76101	C6H7NO	C02372	4.64783e+07	3.21853e+07	84.19	4.58982e+07	3.61437e+07	84.57	1.01	0.02	0.984975	0.01	0.993634	0.0159499	pos
2-Aminophenol	M110T806	110.06	805.8	0.690532	C6H7NO	C01987	2.50997e+07	2.19284e+07	49.79	1.04687e+09	9.75253e+08	63.41	0.02	-5.38	1.75393e-06	5.76	0.000384717	2.10632	pos
Imidazole-4-acetaldehyde	M111T133_1	111.056	133.4	3.81394	C5H6N2O	C05130	4.85479e+08	9.59477e+07	202.59	2.55197e+09	2.65703e+09	64.08	0.19	-2.39	0.00460569	2.34	0.0522209	1.6846	pos
Histamine	M111T167	111.081	166.6	9.90281	C5H9N3	C00388	2.7679e+07	2.82593e+07	32.98	1.10952e+07	7.73138e+06	84.89	2.49	1.32	0.00571849	2.24	0.0598853	1.6597	pos
Catechol	M111T337	111.044	337	0.684413	C6H6O2	C00090	4.77137e+07	4.16651e+07	60.63	5.13549e+07	4.59111e+07	33.33	0.93	-0.11	0.547836	0.26	0.769031	0.423435	pos
Pyrrole-2-carboxylic acid	M111T779	111.019	778.7	6.67255	C5H5NO2	C05942	6.35239e+09	6.81116e+09	44.33	4.19639e+12	3.97131e+12	74.88	0	-9.37	1.418e-07	6.85	0.000115966	2.16363	pos
Cytosine	M112T217	112.05	217.4	5.14056	C4H5N3O	C00380	2.59465e+09	6.46383e+08	163.39	2.18959e+08	1.66844e+08	54.48	11.85	3.57	0.199245	0.7	0.473236	0.91876	pos
Creatinine	M114T142_1	114.066	142.2	5.92642	C4H7N3O	C00791	3.02923e+09	1.96287e+09	115.11	8.56207e+09	2.66951e+09	152.17	0.35	-1.5	0.661853	0.18	0.841874	0.323159	pos
1-Pyrroline-2-carboxylic acid	M114T233	114.066	233.4	6.73863	C5H7NO2	C03564	3.28761e+10	3.6142e+10	67.32	1.22557e+13	3.811e+12	137.09	0	-8.54	9.68512e-05	4.01	0.00437608	1.95704	pos
Epsilon-caprolactam	M114T422	114.091	421.6	2.84798	C6H11NO	C06593	4.18502e+08	9.66015e+07	185.86	3.52872e+08	3.29301e+08	48.05	1.19	0.25	0.245229	0.61	0.520149	0.842664	pos
N-Methylhydantoin	M115T681	115.05	681.5	0.208605	C4H6N2O2	C02565	4.26704e+07	3.46501e+07	69.38	2.7761e+07	2.71064e+07	71.33	1.54	0.62	0.339862	0.47	0.614067	0.646338	pos
Deoxyribose	M117T55	117.055	55.3	0.0258924	C5H10O4	C01801	2.12068e+08	8.52907e+07	157.99	1.73773e+08	1.84582e+08	53.06	1.22	0.29	0.609225	0.22	0.808818	0.394071	pos
L-Valine	M118T338	118.087	337.8	0.970424	C5H11NO2	C00183	1.39094e+08	1.39086e+08	32.97	9.05579e+07	8.53556e+07	28.84	1.54	0.62	0.0445338	1.35	0.207779	1.33361	pos
5-Aminopentanoic acid	M118T358	118.086	357.5	1.76487	C5H11NO2	C00431	7.63619e+07	7.13608e+07	45.29	1.32383e+08	1.264e+08	19.72	0.58	-0.79	0.00937896	2.03	0.0822967	1.61989	pos
L-2,4-diaminobutyric acid	M118T524	118.065	524	0.230318	C4H10N2O2	C03283	5.67407e+10	5.10008e+10	107.67	2.6156e+09	1.22953e+09	133.13	21.69	4.44	0.0776635	1.11	0.284782	1.16798	pos
2-Methylserine	M119T181	119.049	180.5	0.18971	C4H9NO3	C02115	3.35687e+08	1.81384e+08	118.95	2.55083e+08	1.92576e+08	75.77	1.32	0.4	0.883932	0.05	0.953569	0.0376753	pos
Aminomalonic acid	M119T245	119.016	244.7	0.86491	C3H5NO4	C00872	1.19718e+08	81378388	119.31	1.06513e+07	9.93584e+06	45.27	11.24	3.49	0.0504245	1.3	0.222609	1.39208	pos
5-Hydroxypentanoic acid	M119T802	119.069	801.9	14.9158	C5H10O3	C02804	2.78068e+08	2.95274e+08	26.5	2.29316e+08	9.80792e+07	109.46	1.21	0.28	0.203456	0.69	0.47791	0.912354	pos
(S)-2-Phenyloxirane	M120T96	120.066	96.4	2.10662	C8H8O	C20782	6.87756e+08	8.92553e+08	56.71	7.13978e+08	5.71522e+08	48.26	0.96	-0.05	0.59038	0.23	0.797024	0.385351	pos
Styrene Oxide	M121T298_1	121.065	298.4	0.198241	C8H8O	C02083	3.9833e+07	2.97219e+07	73.24	1.87349e+09	1.54542e+09	65.47	0.02	-5.56	2.00257e-06	5.7	0.000423842	2.12721	pos
4-Hydroxybenzoic acid	M121T480	121.028	479.5	2.17153	C7H6O3	C00156	2.355e+08	1.3784e+08	92.2	3.20005e+08	2.07144e+08	104.49	0.74	-0.44	0.481908	0.32	0.727535	0.45586	pos
Benzamide	M122T206	122.06	205.9	1.96497	C7H7NO	C09815	2.48435e+08	1.86344e+08	92.11	2.63592e+07	2.76987e+07	66.18	9.42	3.24	0.00157301	2.8	0.0253362	1.79903	pos
Niacinamide	M123T205	123.055	205.1	0.0312478	C6H6N2O	C00153	5.78867e+07	5.49364e+07	69.74	3.65296e+07	2.70924e+07	99.04	1.58	0.66	0.27022	0.57	0.547327	0.746563	pos
Benzoate	M123T559	123.044	559.1	1.77315	C7H6O2	C00180	2.56546e+07	2.22266e+07	78.12	4.89837e+07	2.35382e+07	152.08	0.52	-0.93	0.607708	0.22	0.808145	0.318599	pos
Nicotinic acid	M124T136	124.039	135.6	0.127826	C6H5NO2	C00253	4.29948e+08	3.90635e+08	74.66	1.02846e+11	5.33558e+10	84.04	0	-7.9	5.03381e-07	6.3	0.000198839	2.12931	pos
L-Histidinol	M124T32	124.086	32.3	26.0626	C6H11N3O	C00860	3.55183e+08	3.40489e+08	11.69	2.87245e+08	3.17579e+08	42.22	1.24	0.31	0.290813	0.54	0.565835	0.794008	pos
Picolinic acid	M124T804	124.04	804.3	7.4492	C6H5NO2	C10164	6.7558e+08	5.86722e+08	47.41	1.02212e+09	1.02839e+09	24.61	0.66	-0.6	0.0666134	1.18	0.259067	1.23252	pos
Ciliatine	M126T173	126.066	173.3	29.4617	C2H8NO3P	C03557	3.48326e+07	2.92586e+07	56.16	6.90255e+07	5.57451e+07	64.1	0.5	-0.99	0.0569683	1.24	0.238762	1.19067	pos
1-Methylhistamine	M126T303	126.102	303	6.10285	C6H11N3	C05127	8.59166e+07	5.90268e+07	83.62	1.47764e+08	1.08655e+08	75.59	0.58	-0.78	0.193544	0.71	0.465634	0.94407	pos
Aminohydroquinone	M126T55	126.055	55.3	0.954733	C6H7NO2	C14604	1.56776e+08	1.66016e+08	40.02	3.96524e+09	4.00348e+09	53.65	0.04	-4.66	3.46466e-06	5.46	0.000557303	2.10985	pos
3-Hydroxyaminophenol	M126T668	126.055	667.8	3.36361	C6H7NO2	C14602	2.02833e+07	1.04438e+07	114.09	2.26438e+08	1.51365e+08	98.17	0.09	-3.48	0.00250878	2.6	0.0348685	1.72787	pos
Triacetate lactone	M127T138_1	127.039	137.7	0.188918	C6H6O3	C02752	3.22959e+08	2.80175e+08	83.46	1.65438e+08	1.37592e+08	68.5	1.95	0.97	0.37031	0.43	0.643257	0.554533	pos
Thymine	M127T203_2	127.05	202.9	0.598189	C5H6N2O2	C00178	5.32885e+07	4.0755e+07	73.64	3.66647e+07	3.277e+07	50.88	1.45	0.54	0.541804	0.27	0.765646	0.436697	pos
(R)-5,6-Dihydrothymine	M128T573	128.072	572.7	4.20521	C5H8N2O2	C21028	3.83669e+08	2.78705e+08	86.79	5.93218e+07	3.0415e+07	119.01	6.47	2.69	0.00958689	2.02	0.0837482	1.56715	pos
gamma-Amino-gamma-cyanobutanoate	M129T447	129.067	446.9	11.8079	C5H8N2O2	C05715	9.60545e+07	8.8325e+07	62.48	2.16274e+08	1.85445e+08	45.17	0.44	-1.17	0.0192803	1.71	0.127613	1.48825	pos
Pyrrolidonecarboxylic acid	M130T322	130.051	322.5	6.15145	C5H7NO3	C02237	1.4102e+08	1.17642e+08	66.25	1.71172e+08	1.73763e+08	32.45	0.82	-0.28	0.331206	0.48	0.606186	0.696138	pos
L-Pipecolic acid	M130T345_2	130.086	345.1	0.928772	C6H11NO2	C00408	5.16001e+07	6.06912e+07	50.81	7.27466e+07	1.52831e+07	147.4	0.71	-0.5	0.505446	0.3	0.742989	0.516575	pos
Pyroglutamic acid	M130T489	130.049	489.5	2.83209	C5H7NO3	C01879	9.42334e+07	1.03511e+08	69.64	1.26924e+07	1.22594e+07	77.75	7.42	2.89	0.00495185	2.31	0.0542443	1.66701	pos
2-Ketohexanoic acid	M130T502	130.066	501.7	4.51258	C6H10O3	C00902	1.89872e+08	1.63765e+08	58.84	1.24686e+08	1.20866e+08	45.23	1.52	0.61	0.299331	0.52	0.574314	0.667038	pos
Isoquinoline	M130T571	130.065	570.7	0.953368	C9H7N	C06323	2.16405e+08	2.05886e+08	61.03	1.60222e+08	1.66164e+08	71.71	1.35	0.43	0.395394	0.4	0.662978	0.687941	pos
Adipate semialdehyde	M130T630	130.065	629.6	0.0461758	C6H10O3	C06102	1.78318e+07	1.90823e+07	40.48	9.98719e+07	9.94919e+07	34.07	0.18	-2.49	2.43101e-05	4.61	0.00188053	2.04951	pos
4-Guanidinobutanal	M130T673	130.086	672.7	1.31184	C5H11N3O	C02647	1.93214e+08	1.46712e+08	71.44	2.92002e+08	2.4088e+08	93.61	0.66	-0.6	0.680825	0.17	0.85152	0.363269	pos
4-Oxoproline	M130T801	130.049	801.5	2.89121	C5H7NO3	C01877	9.49758e+08	6.05037e+08	109.04	6.56494e+08	5.72796e+08	31.01	1.45	0.53	0.80519	0.09	0.916642	0.169526	pos
2-Oxo-4-methylthiobutanoic acid	M131T66_2	131.012	66	1.78609	C5H8O3S	C01180	91172051	9.10159e+07	25.87	1.34421e+08	1.19482e+08	45.68	0.68	-0.56	0.122274	0.91	0.368503	1.05465	pos
N-Acetylputrescine	M131T94	131.118	94.2	1.34413	C6H14N2O	C02714	1.40141e+08	1.33344e+08	42.04	2.22851e+08	1.78756e+08	65.33	0.63	-0.67	0.16292	0.79	0.427927	0.907805	pos
L-Leucine	M132T207	132.044	207.2	17.3427	C6H13NO2	C00123	9.16089e+07	6.98067e+07	104.77	3.68719e+08	2.26894e+08	101.45	0.25	-2.01	0.0255286	1.59	0.149867	1.43178	pos
Glutaric acid	M132T262	132.044	261.6	10.6026	C5H8O4	C00489	4.14552e+07	4.47884e+07	43.62	4.93378e+07	4.49659e+07	24.1	0.84	-0.25	0.376111	0.42	0.647005	0.632367	pos
N-Carbamoylputrescine	M132T300	132.102	299.9	2.41298	C5H13N3O	C00436	1.07804e+08	5.18817e+07	115.61	1.11787e+08	9.63367e+07	65.73	0.96	-0.05	0.362231	0.44	0.636166	0.682634	pos
2-Acetolactate	M132T439	132.044	438.7	0.202828	C5H8O4	C00900	1.72598e+08	1.60764e+08	58.77	2.70109e+08	2.34753e+08	36.66	0.64	-0.65	0.100352	1	0.330882	1.13096	pos
L-Asparagine	M132T582	132.102	581.9	1.3848	C4H8N2O3	C00152	4.68429e+07	9.90674e+06	164.73	5.46346e+08	2.88539e+08	98.4	0.09	-3.54	0.00163967	2.79	0.0260758	1.78092	pos
(S)-4-Amino-5-oxopentanoate	M132T717	132.081	716.6	27.6043	C5H9NO3	C03741	2.26666e+07	1.80728e+07	68.11	1.6508e+07	1.51171e+07	32.54	1.37	0.46	0.440626	0.36	0.697509	0.561779	pos
Ketoleucine	M132T830_1	131.533	830.1	0.0113223	C6H10O3	C00233	1.14623e+09	1.06489e+09	17.98	1.41942e+09	1.42643e+09	14.46	0.81	-0.31	0.0373279	1.43	0.186855	1.30852	pos
Creatine	M132T89	132.076	89.4	4.37456	C4H9N3O2	C00300	1.87322e+09	1.67568e+09	80.68	2.30213e+09	1.40714e+09	86.76	0.81	-0.3	0.673871	0.17	0.847434	0.304697	pos
Ureidopropionic acid	M132T91	132.102	91.4	2.07785	C4H8N2O3	C02642	8.49258e+08	5.79652e+08	80.83	7.09392e+08	3.89295e+08	90.19	1.2	0.26	0.524972	0.28	0.754164	0.37671	pos
5,6-Dihydro-5-fluorouracil	M133T141_1	133.032	141.3	0.00680574	C4H5FN2O2	C16630	116963467	7.96681e+07	92.26	1.05488e+08	9.5095e+07	47.87	1.11	0.15	0.613099	0.21	0.811278	0.394677	pos
L-Ribulose	M133T280	133.049	280.2	6.76441	C5H10O5	C00310	1.55421e+07	1.34341e+07	62.23	8.69178e+06	7.81727e+06	41.23	1.79	0.84	0.186098	0.73	0.45604	0.919869	pos
Cinnamaldehyde	M133T370	133.065	369.5	0.0182218	C9H8O	C00903	6.91108e+06	4.90614e+06	69.84	2.05854e+07	5.04081e+06	167.46	0.34	-1.57	0.451951	0.34	0.706444	0.482686	pos
Ornithine	M133T71	133.097	70.8	0	C5H12N2O2	C00077	1.12141e+08	4.58127e+07	149.52	7.77952e+07	5.17685e+07	114.95	1.44	0.53	0.953977	0.02	0.981931	0.0390174	pos
L-Aspartic acid	M133T79	133.037	79.4	1.50334	C4H7NO4	C00049	1.94705e+07	1.9124e+07	35.01	1.4506e+07	1.06322e+07	87.72	1.34	0.42	0.199123	0.7	0.473064	0.888207	pos
(R)-2,3-Dihydroxy-isovalerate	M134T183	134.06	183	16.4108	C5H10O4	C04272	3.63651e+07	2.25477e+07	102.2	8.30684e+06	6.76539e+06	93.69	4.38	2.13	0.02407	1.62	0.145847	1.43706	pos
Indolin-2-one	M134T407	134.061	406.8	6.89238	C8H7NO	C12312	6.55255e+08	5.14057e+08	85.47	3.47044e+08	3.291e+08	42.53	1.89	0.92	0.403775	0.39	0.669766	0.603475	pos
Hydroxyindole	M134T481	134.06	481.3	1.67326	C8H7NO	C02040	7.41844e+07	6.60492e+07	59.46	2.84776e+07	2.39575e+07	47.26	2.61	1.38	0.0136187	1.87	0.103071	1.5489	pos
Chavicol	M135T505	135.08	504.6	2.4987	C9H10O	C16930	1.05694e+08	9.52372e+07	62.65	7.43067e+07	6.14556e+07	38.18	1.42	0.51	0.536626	0.27	0.761989	0.464928	pos
(R)-mandelic Acid	M135T508	135.044	507.8	0.665376	C8H8O3	C01983	1.9034e+07	1.28571e+07	79.48	2.85661e+07	2.19388e+07	116.8	0.67	-0.59	0.748145	0.13	0.887924	0.218183	pos
Perillyl alcohol	M135T575	135.117	574.6	29.8557	C10H16O	C02452	2.59118e+07	2.02846e+07	54.31	4.98725e+07	5.0354e+07	49.45	0.52	-0.94	0.0531278	1.27	0.229428	1.26883	pos
4-Propylphenol	M136T265_2	136.087	265.2	15.4313	C9H12O	C14311	6.11741e+07	9.93184e+06	151.46	2.8906e+07	1.65179e+07	129.42	2.12	1.08	0.949095	0.02	0.979627	0.0423808	pos
4-Hydroxyphenylacetaldehyde	M136T323	136.048	322.9	2.82738	C8H8O2	C03765	8.85874e+07	5.43689e+07	104.28	6.38288e+09	5.65222e+09	63.62	0.01	-6.17	3.43302e-06	5.46	0.000557303	2.10409	pos
p-Octopamine	M136T414	136.075	414.5	25.971	C8H11NO2	C04227	1.09937e+09	1.15182e+09	67.05	1.29549e+09	1.18102e+09	50.77	0.85	-0.24	0.478402	0.32	0.7246	0.52008	pos
Norfenefrine	M136T800_2	136.075	800.2	26.8631	C8H11NO2	D08286	1.68444e+08	1.07693e+08	72.16	1.35354e+09	1.45196e+09	51.17	0.12	-3.01	0.00791372	2.1	0.0740086	1.61187	pos
2-Aminobenzoic acid	M137T121	137.046	121.2	16.0531	C7H7NO2	C00108	1.41667e+09	2.81278e+08	158.71	1.08475e+07	6.71246e+06	114.19	130.6	7.03	0.000149195	3.83	0.00568962	1.9564	pos
d-Limonene	M137T231	137.132	230.9	0.0178982	C10H16	C06099	2.24237e+08	1.45239e+08	95.03	3.9695e+07	2.72791e+07	69.19	5.65	2.5	0.00318802	2.5	0.04109	1.71901	pos
Gamma-terpinene	M137T596	137.132	595.9	0.00373869	C10H16	C09900	3.40521e+07	3.04526e+07	51.34	7.5755e+06	6.47677e+06	55.43	4.5	2.17	0.000463807	3.33	0.0119559	1.90773	pos
Phenylacetic acid	M137T620	137.132	620.1	0.479386	C8H8O2	C07086	1.6593e+07	1.41419e+07	37.75	4.93792e+07	4.76687e+07	15.81	0.34	-1.57	3.46818e-05	4.46	0.00241851	2.0074	pos
1-Methylnicotinamide	M137T83	137.07	82.9	4.88993	C7H9N2O	C02918	3.87314e+08	3.76921e+08	54.27	9.23292e+08	6.33096e+08	66.41	0.42	-1.25	0.0446249	1.35	0.207779	1.30104	pos
3-Hydroxybenzoic acid	M138T158	138.043	157.6	0.313806	C7H6O3	C00587	5.83344e+07	2.15556e+06	220.86	6.24301e+07	4.44419e+06	229.3	0.93	-0.1	0.843479	0.07	0.934325	0.204459	pos
Tyramine	M138T166	138.091	165.6	2.72284	C8H11NO	C00483	2.00573e+07	2.28882e+07	37.37	2.2148e+07	1.62883e+07	59.57	0.91	-0.14	0.856576	0.07	0.940713	0.0932252	pos
Tyrosol	M138T801	138.054	800.6	6.55686	C8H10O2	C06044	4.45437e+08	4.18796e+08	51.26	2.32669e+09	2.65474e+09	66.98	0.19	-2.38	0.0072401	2.14	0.0694866	1.6293	pos
p-Aminobenzoic acid	M138T91	138.055	90.8	0.0037137	C7H7NO2	C00568	3.04246e+09	1.94458e+09	83.12	2.48367e+09	2.56396e+09	56.53	1.22	0.29	0.775193	0.11	0.902805	0.186349	pos
6-Hydroxynicotinic acid	M140T276	140.034	276.5	3.39918	C6H5NO3	C01020	3.96967e+08	2.72122e+08	113.97	1.23714e+08	1.21245e+08	14.85	3.21	1.68	0.281426	0.55	0.5574	0.807401	pos
Acetylphosphate	M140T33	139.987	33.3	0.71435	C2H5O5P	C00227	4.76027e+08	4.74399e+08	7.64	4.07033e+08	4.16051e+08	13.92	1.17	0.23	0.0307969	1.51	0.167282	1.34245	pos
3-Hydroxypicolinic acid	M140T404	140.034	404.5	0.0644549	C6H5NO3	C18620	3.8827e+07	3.62232e+07	57.93	3.11272e+07	2.07107e+07	81.35	1.25	0.32	0.483317	0.32	0.727885	0.495608	pos
4-Amino-5-hydroxymethyl-2-methylpyrimidine	M140T501	140.081	501.3	6.63877	C6H9N3O	C01279	1.83564e+08	1.56318e+08	78.45	4.89988e+08	4.69483e+08	60.78	0.37	-1.42	0.0400218	1.4	0.195073	1.37271	pos
4,5,6,7-Tetrahydroisoxazolo(5,4-c)pyridin-3-ol	M141T314	141.065	314.4	2.20783	C6H8N2O2	C13693	1.00747e+09	5.33994e+08	110.73	8.74986e+07	6.92043e+07	73.99	11.51	3.53	0.0171245	1.77	0.119446	1.48606	pos
O-Phosphoethanolamine	M141T351_1	141.01	351.2	0.0576546	C2H8NO4P	C00346	4.176e+07	4.01644e+07	21.63	3.13753e+07	3.11666e+07	10.19	1.33	0.41	0.016957	1.77	0.119004	1.48167	pos
5-Methylbarbiturate	M142T66_1	142.035	65.9	19.7135	C5H6N2O3	C05281	4.70452e+09	1.15504e+09	191.86	1.56246e+08	1.60631e+08	26.15	30.11	4.91	0.00923284	2.03	0.0817204	1.74782	pos
trans-trans-Muconic acid	M143T200	143.034	200.3	0.00848005	C6H6O4	C02480	2.52132e+09	4.39014e+08	208.31	6.70237e+09	5.90424e+09	50.91	0.38	-1.41	0.0167777	1.78	0.11809	1.58698	pos
2-Naphthylamine	M144T391	144.081	390.9	0.166573	C10H9N	C02227	9.9382e+07	8.24291e+07	62.42	1.2041e+08	1.01992e+08	46.08	0.83	-0.28	0.425546	0.37	0.685174	0.551665	pos
2-Naphthol	M144T440_2	144.065	440	3.2523	C10H8O	C11713	5.64309e+07	4.26437e+07	57.75	6.94692e+08	5.72127e+08	95.24	0.08	-3.62	0.00873198	2.06	0.0790267	1.63927	pos
Aminoadipic acid	M144T93	144.065	92.7	28.6953	C6H11NO4	C00956	2.48188e+08	1.14703e+08	133.08	1.53938e+08	8.20219e+07	118.01	1.61	0.69	0.447246	0.35	0.702183	0.538765	pos
2-Keto-glutaramic acid	M145T261	145.049	261.1	2.568	C5H7NO4	C00940	1.79343e+09	1.44068e+09	82.47	8.60092e+08	7.85432e+08	50.59	2.09	1.06	0.664997	0.18	0.843145	0.325606	pos
4-Oxoglutaramate	M145T349	145.05	349	0.0252591	C5H7NO4	C05572	7.17963e+08	6.33715e+08	58.47	1.45076e+08	8.06712e+07	116.76	4.95	2.31	0.00806336	2.09	0.0747704	1.61519	pos
1-Naphthol	M145T366	145.065	365.8	0	C10H8O	C11714	3.13155e+07	1.80335e+07	116.73	3.13634e+07	7.14968e+06	123.32	1	0	0.739369	0.13	0.882794	0.170923	pos
Spermidine	M145T807	144.982	807.2	1.12066	C7H19N3	C00315	3.49326e+08	4.20608e+08	53.29	3.4193e+08	3.76324e+08	56.4	1.02	0.03	0.957907	0.02	0.983589	0.0137072	pos
2-Keto-6-aminocaproate	M146T128	146.081	128.2	1.84097	C6H11NO3	C03239	7.20252e+08	4.53743e+08	77.11	4.74979e+07	3.75718e+07	71.5	15.16	3.92	7.36946e-05	4.13	0.00375127	1.99003	pos
2-Dehydropantoate	M146T347	146.059	346.8	4.51253	C6H10O4	C00966	3.43766e+08	2.83835e+08	70.56	5.28683e+08	4.76908e+08	38.05	0.65	-0.62	0.0957104	1.02	0.321182	1.18561	pos
8-Hydroxyquinoline	M146T503	146.059	502.9	4.08025	C9H7NO	C19434	7.08053e+07	7.93408e+07	43.41	1.00632e+08	9.91644e+07	16.03	0.7	-0.51	0.0924288	1.03	0.315702	1.18155	pos
Oxoglutaric acid	M146T66	146.03	65.9	0.0662053	C5H6O5	C00026	3.29967e+08	3.15195e+08	31.29	4.23337e+08	403251325	30.97	0.78	-0.36	0.199716	0.7	0.473846	0.874906	pos
(S)-2-amino-6-oxohexanoate	M146T803	146.082	802.5	5.55466	C6H11NO3	C04076	1.18081e+10	2.29423e+09	179.8	4.47566e+08	4.4926e+08	50.28	26.38	4.72	0.014268	1.85	0.106714	1.64481	pos
4-Guanidinobutanoic acid	M146T87	146.081	86.8	2.32357	C5H11N3O2	C01035	4.02936e+08	3.07276e+08	63.45	6.44841e+08	6.93929e+08	58.58	0.62	-0.68	0.261932	0.58	0.538359	0.724438	pos
(2R,5S)-2,5-Diaminohexanoate	M146T89	146.117	88.8	2.37306	C6H14N2O2	C05161	6.63839e+08	3.74852e+08	93.05	7.61162e+09	7.30729e+09	80.74	0.09	-3.52	0.0106336	1.97	0.0889005	1.57423	pos
L-Glutamic acid	M147T71	147.113	71	0.33191	C5H9NO4	C00025	5.60764e+08	3.5831e+08	102.35	5.15373e+08	3.1447e+08	110	1.09	0.12	0.805694	0.09	0.916671	0.163316	pos
4-Hydroxycinnamic acid	M147T808	146.981	807.9	6.0485	C9H8O3	C00811	1.6476e+08	1.67557e+08	63.54	3.93427e+08	3.89675e+08	44.82	0.42	-1.26	0.0321088	1.49	0.171627	1.39649	pos
L-Glutamine	M147T83	147.077	83.2	4.6042	C5H10N2O3	C00064	4.67394e+08	3.62907e+08	86.05	3.66164e+08	2.58403e+08	80.76	1.28	0.35	0.666866	0.18	0.843666	0.278687	pos
Nornicotine	M148T124	148.096	124.4	23.6332	C9H12N2	C06524	3.3784e+07	3.02568e+07	71.32	9.29297e+07	5.78724e+07	92.58	0.36	-1.46	0.0447186	1.35	0.208125	1.35456	pos
Pseudoephedrine	M148T324	148.112	323.8	27.2361	C10H15NO	C02765	5.14527e+07	4.28407e+07	48.69	8.49691e+07	5.16706e+07	78.33	0.61	-0.72	0.305278	0.52	0.580895	0.773068	pos
L-threo-3-Methylaspartate	M148T458	148.06	458.2	0.147167	C5H9NO4	C03618	2.53422e+07	2.15653e+07	75.91	3.19664e+07	3.25412e+07	60.96	0.79	-0.34	0.511319	0.29	0.745985	0.461883	pos
(E)-3-(4-Hydroxyphenyl)-2-propenal	M149T298	149.061	297.9	6.67181	C9H8O2	C05608	1.52606e+08	1.06716e+08	95.95	1.44793e+08	1.22524e+08	58.3	1.05	0.08	0.79321	0.1	0.911864	0.215706	pos
3,4-Dihydro-2H-1-benzopyran-2-one	M149T358	149.06	357.7	5.33008	C9H8O2	C02274	1.85516e+07	1.74734e+07	66.98	5.59429e+07	1.64494e+07	182.42	0.33	-1.59	0.62364	0.21	0.818545	0.312315	pos
Cuminaldehyde	M149T448	149.097	447.7	7.03357	C10H12O	C06577	9.1189e+07	8.57601e+07	64.93	1.23162e+08	8.89252e+07	81.38	0.74	-0.43	0.468114	0.33	0.717761	0.480164	pos
Estragole	M149T582	149.097	582.1	5.76062	C10H12O	C10452	3.33524e+07	1.91941e+07	103.46	1.39546e+07	1.00691e+07	79.16	2.39	1.26	0.323498	0.49	0.599581	0.74198	pos
Phthalic acid	M149T586	149.023	585.9	26.3986	C8H6O4	C01606	2.58524e+08	2.73348e+08	61.72	2.57981e+08	2.22433e+08	55.64	1	0	0.78637	0.1	0.908693	0.188008	pos
threo-3-Hydroxy-L-aspartate	M149T750	149.024	750.5	6.10533	C4H7NO5	C11511	7.25405e+07	5.54932e+07	74.34	6.70211e+07	7.77114e+07	36.38	1.08	0.11	0.887945	0.05	0.955091	0.124534	pos
erythro-3-Hydroxy-Ls-aspartate	M149T784	149.023	783.8	2.32168	C4H7NO5	C03961	6.16898e+07	4.51608e+07	80.44	7.32838e+07	9.16395e+07	57.91	0.84	-0.25	0.757515	0.12	0.893006	0.260312	pos
L-Methionine	M150T142	150.058	141.7	1.83929	C5H11NO2S	C00073	2.07581e+08	8.25943e+07	124.51	2.46295e+08	2.21894e+08	44.97	0.84	-0.25	0.177701	0.75	0.445009	0.996118	pos
7-Methyladenine	M150T143	150.077	143.2	0.00406691	C6H7N5	C02241	7.11239e+07	7.60641e+07	34.38	6.40873e+07	5.77059e+07	27.64	1.11	0.15	0.709611	0.15	0.867607	0.25893	pos
5,6-Dihydroxyindole	M150T57	150.055	57.1	0.826364	C8H7NO2	C05578	3.89854e+08	3.56732e+08	79.54	9.23248e+06	5.57813e+06	73.12	42.23	5.4	1.64935e-05	4.78	0.0014849	2.01311	pos
3-Methyladenine	M150T809	150.128	809.2	12.1005	C6H7N5	C00913	2.57395e+08	3.10596e+08	61.65	3.22827e+08	2.65248e+08	63.31	0.8	-0.33	0.514763	0.29	0.748295	0.525528	pos
Piperonal	M151T365	151.039	364.9	0.0757521	C8H6O3	C10812	3.31605e+08	3.90812e+08	56.71	4.86752e+08	4.28434e+08	57.51	0.68	-0.55	0.245077	0.61	0.520071	0.774025	pos
Pulegone	M153T498	153.127	497.9	0	C10H16O	C09893	2.82321e+08	3.01441e+08	44.05	1.07e+09	4.87493e+08	110.6	0.26	-1.92	0.137304	0.86	0.393827	0.917323	pos
2',4'-Dihydroxyacetophenone	M153T574	153.127	574.3	1.77771	C8H8O3	C03663	1.47886e+08	6.61523e+07	145.1	6.12601e+07	4.6479e+07	64.37	2.41	1.27	0.435333	0.36	0.693315	0.522824	pos
2-Biphenylol	M153T635	153.065	635	3.21212	C12H10O	C02499	5.30532e+08	5.13498e+08	29.5	3.50653e+08	2.82978e+08	59.65	1.51	0.6	0.0929771	1.03	0.316426	1.08657	pos
3-Hydroxyphenylacetic acid	M153T670	153.012	669.8	5.10758	C8H8O3	C05593	2.27771e+08	1.92236e+08	92.39	2.47316e+08	2.10862e+08	80.95	0.92	-0.12	0.851515	0.07	0.937973	0.133825	pos
D-Arabitol	M153T758	152.995	757.7	1.1183	C5H12O5	C01904	1.18415e+08	1.15575e+08	66	2.0499e+08	1.6886e+08	74.98	0.58	-0.79	0.323657	0.49	0.599589	0.65407	pos
D-Xylitol	M153T776	153.127	776.2	0.261635	C5H12O5	C00379	3.29958e+07	2.27276e+07	78.77	3.60963e+08	1.83763e+08	118.39	0.09	-3.45	0.00103715	2.98	0.0193888	1.83422	pos
4-Hydroxy-3-methoxybenzenemethanol	M154T175	154.069	175.2	19.6448	C8H10O3	C06317	4.43324e+07	4.14451e+07	45.33	6.60795e+06	3.55611e+06	130.99	6.71	2.75	0.00049627	3.3	0.0125251	1.91052	pos
Vanillylamine	M154T290	154.085	290.3	5.68513	C8H11NO2	C16666	2.98317e+08	1.45227e+08	128.18	1.06951e+09	1.00451e+09	54.65	0.28	-1.84	0.0171189	1.77	0.119446	1.51738	pos
Imidazol-5-yl-pyruvate	M154T351	154.041	351.2	20.1245	C6H6N2O3	C03277	4.12816e+09	4.00668e+09	9.63	4.07952e+09	4.20838e+09	7.34	1.01	0.02	0.834628	0.08	0.930501	0.113909	pos
3-Amino-4-hydroxybenzoate	M154T405	154.05	404.8	0.155794	C7H7NO3	C12115	4.7643e+07	3.85406e+07	88.27	5.33296e+07	3.9765e+07	73.41	0.89	-0.16	0.67385	0.17	0.847434	0.261821	pos
2,3-Butanediol	M154T57_1	154.05	56.9	15.4215	C4H10O2S2	C00265	1.05499e+08	9.78526e+07	77.91	2.66685e+07	2.08372e+07	54.36	3.96	1.98	0.0132765	1.88	0.101758	1.52984	pos
3-Hydroxyanthranilic acid	M154T631	154.049	631	5.17644	C7H7NO3	C00632	1.70744e+08	1.61724e+08	66.96	9.56897e+07	7.86043e+07	52.27	1.78	0.84	0.260421	0.58	0.536222	0.761858	pos
Propanoyl phosphate	M154T763	153.993	762.8	2.09764	C3H7O5P	C02876	7.29071e+09	4.99839e+09	88.33	4.98126e+08	4.92317e+08	11.78	14.64	3.87	0.00454293	2.34	0.0519335	1.86028	pos
Gentisic acid	M155T828	154.99	828	0.959612	C7H6O4	C00628	7.44168e+08	8.25672e+08	42.49	7.14701e+08	6.89742e+08	63.72	1.04	0.06	0.7236	0.14	0.875523	0.216005	pos
Uracil 5-carboxylate	M156T739	156.12	738.8	1.07323	C5H4N2O4	C03030	7.97366e+07	8.02687e+07	25.74	3.20901e+07	2.73484e+07	43.6	2.48	1.31	0.00137508	2.86	0.0231045	1.82315	pos
Phosphoglycolic acid	M157T638	156.99	637.7	0.484109	C2H5O6P	C00988	1.43272e+08	1.13977e+08	82.39	4.42016e+07	1.55629e+07	132.88	3.24	1.7	0.0311411	1.51	0.168434	1.34437	pos
Imidazolelactic acid	M157T89	157.06	88.9	2.34389	C6H8N2O3	C05132	1.89477e+08	1.71354e+08	29.17	2.28088e+08	2.18301e+08	41.75	0.83	-0.27	0.48818	0.31	0.731335	0.544417	pos
N-Acetylornithine	M157T96	157.097	96.3	26.9515	C7H14N2O3	C00437	1.89085e+08	9.38324e+07	102.07	7.35997e+07	5.39453e+07	71.2	2.57	1.36	0.205912	0.69	0.479622	0.842513	pos
N-Acetyl-L-aspartic acid	M158T456	158.045	456.5	26.7899	C6H9NO5	C01042	1.51987e+07	1.04382e+07	84.08	2.07552e+07	1.7266e+07	43.63	0.73	-0.45	0.245074	0.61	0.520071	0.837127	pos
5-Acetamidovalerate	M159T347	159.091	346.8	12.5714	C7H13NO3	C03087	1.47714e+08	1.2498e+08	78.08	1.80353e+08	1.51988e+08	48.22	0.82	-0.29	0.384532	0.42	0.653872	0.686021	pos
(1H-Indol-3-yl)-N-methylmethanamine	M160T202	160.097	201.9	21.2372	C10H12N2	C21602	3.30259e+07	2.13577e+07	111.5	3.34089e+08	3.12551e+08	66.67	0.1	-3.34	0.00122097	2.91	0.021472	1.76988	pos
Indoleacetaldehyde	M160T503	160.076	503	2.56186	C10H9NO	C00637	4.05382e+07	3.62204e+07	58.93	5.00351e+07	4.76163e+07	49.93	0.81	-0.3	0.468099	0.33	0.717761	0.549271	pos
4-Acetamido-2-aminobutanoic acid	M161T337	161.092	337.4	0.148983	C6H12N2O3	C06442	5.35337e+07	3.00754e+07	98.81	4.11751e+07	4.14222e+07	45.45	1.3	0.38	0.947572	0.02	0.979177	0.102409	pos
3D-3,5_4-Trihydroxycyclohexane-1,2-dione	M161T532	161.06	531.9	0.275911	C6H8O5	C04287	1.47195e+07	8.48007e+06	99.84	7.10655e+07	6.45643e+07	61.15	0.21	-2.27	0.00165192	2.78	0.0261875	1.79631	pos
N(6)-Methyllysine	M161T74	161.128	74	0.471673	C7H16N2O2	C02728	4.48391e+07	4.78348e+07	50.15	6.30233e+07	4.34939e+07	86.41	0.71	-0.49	0.562428	0.25	0.780571	0.370863	pos
Anatabine	M161T836	161.107	835.7	0.148969	C10H12N2	C10126	9.82995e+07	9.84108e+07	34.6	9.18069e+07	9.48738e+07	12.41	1.07	0.1	0.860285	0.07	0.942384	0.12416	pos
S-Carboxymethyl-L-cysteine	M162T331	162.022	331.1	26.1323	C5H9NO4S	C03727	1.74533e+07	1.60359e+07	76.82	4.95818e+07	4.49986e+07	51.59	0.35	-1.51	0.0628765	1.2	0.251339	1.3001	pos
L-Homophenylalanine	M162T486	162.091	485.7	26.1211	C10H13NO2	C17235	2.4641e+07	2.41419e+07	47.31	1.94623e+07	2.10399e+07	36.06	1.27	0.34	0.467199	0.33	0.717761	0.488755	pos
4-Hydroxy-2-quinolone	M162T578	162.057	578.4	11.2553	C9H7NO2	C16716	3.08423e+07	2.72915e+07	75.89	3.51021e+08	3.11646e+08	78.68	0.09	-3.51	0.00244853	2.61	0.0342362	1.72001	pos
L-Rhamnono-1,4-lactone	M162T631	162.057	630.9	24.0662	C6H10O5	C02991	6.91578e+07	7.70999e+07	71.36	1.06899e+09	1.27513e+08	221.22	0.06	-3.95	0.159245	0.8	0.423413	0.908397	pos
Safrole	M163T639	163.077	638.6	6.89247	C10H10O2	C10490	9.17834e+06	7.24308e+06	91.6	5.11733e+06	4.31899e+06	41.64	1.79	0.84	0.541314	0.27	0.765223	0.427219	pos
4-Hydroxy-L-glutamate	M164T228	164.056	227.7	4.41312	C5H9NO5	C03079	1.56033e+07	1.12824e+07	91.68	3.83246e+07	2.73966e+07	76.2	0.41	-1.3	0.0919407	1.04	0.31474	1.10845	pos
Acetylcysteine	M164T344	164.037	343.8	0.34337	C5H9NO3S	C06809	3.05274e+07	1.52497e+07	104.14	1.0599e+07	1.14346e+07	37.76	2.88	1.53	0.364928	0.44	0.638078	0.648833	pos
2-Hydroxycinnamic acid	M165T124	165.055	124.2	0.0106137	C9H8O3	C01772	1.47932e+09	7.65783e+08	103.65	2.67817e+09	1.81219e+09	100.24	0.55	-0.86	0.181812	0.74	0.450293	0.930446	pos
3,4-Dihydroxyphenylpropanoate	M165T181	165.054	180.5	20.1995	C9H10O4	C10447	1.03258e+09	5.74744e+08	130.49	4.02753e+08	3.04175e+08	71.36	2.56	1.36	0.191528	0.72	0.462792	0.846653	pos
2-Phenylethyl acetate	M165T433	165.091	432.9	0.57166	C10H12O2	C12303	4.03042e+07	4.01484e+07	53.03	1.39931e+08	1.1146e+08	59.46	0.29	-1.8	0.0141571	1.85	0.106213	1.50964	pos
Isoeugenol	M165T489	165.091	489.3	0.145374	C10H12O2	C10469	5.3886e+07	4.51688e+07	59.59	8.30953e+07	8.09358e+07	43.29	0.65	-0.62	0.123057	0.91	0.369845	1.06349	pos
Phenylpyruvic acid	M165T570	165.055	570.1	1.96299	C9H8O3	C00166	1.02347e+07	8.31125e+06	75.41	2.03813e+07	1.83391e+07	68.45	0.5	-0.99	0.112416	0.95	0.351708	1.06143	pos
Eugenol	M165T590	165.091	589.8	0.605726	C10H12O2	C10453	4.00321e+08	5.05038e+07	212.16	9.08727e+06	7.29576e+06	68.39	44.05	5.46	0.0164453	1.78	0.116663	1.4893	pos
L-Rhamnofuranose	M165T638	165.077	638.5	4.99162	C6H12O5	C02431	1.7082e+07	1.25067e+07	107.23	4.13449e+07	2.81665e+07	91.14	0.41	-1.28	0.150596	0.82	0.412684	0.907346	pos
L-Phenylalanine	M166T298	166.087	297.9	1.23092	C9H11NO2	C00079	7.61414e+09	4.67404e+09	105.12	7.93615e+09	6.21925e+09	67.3	0.96	-0.06	0.575522	0.24	0.788989	0.440691	pos
D-beta-Phenylalanine	M166T448	166.086	447.6	1.66179	C9H11NO2	C20488	3.5854e+07	3.71922e+07	29.17	4.99915e+08	4.91456e+08	26.62	0.07	-3.8	3.25031e-08	7.49	5.60168e-05	2.16358	pos
3,4-Dihydroxymandelic acid	M167T335	167.034	335.2	0.0296843	C8H8O5	C05580	2.46255e+07	1.92978e+07	87.67	3.01176e+07	9.08181e+06	177.47	0.82	-0.29	0.709789	0.15	0.867607	0.304141	pos
Vanylglycol	M167T396	167.07	396.1	0.0596608	C9H12O4	C05594	1.37357e+07	1.20903e+07	30	4.87817e+07	9.32053e+06	193.66	0.28	-1.83	0.707147	0.15	0.866974	0.193543	pos
Quinolinic acid	M167T66_1	167.013	66	1.25102	C7H5NO4	C03722	6.8948e+08	5.70115e+08	73.82	6.34726e+08	4.1826e+08	85.25	1.09	0.12	0.966289	0.01	0.986288	0.0144944	pos
Homovanillin	M167T676	167.056	675.9	3.87247	C9H10O3	C05581	8.28724e+07	3.83499e+07	121.24	1.04944e+07	8.4109e+06	68.17	7.9	2.98	0.00271626	2.57	0.0370271	1.71486	pos
1-Methylxanthine	M167T798	167.055	798.2	5.84234	C6H6N4O2	C16358	6.87493e+09	3.49557e+09	114.06	4.18496e+08	3.76332e+08	36.08	16.43	4.04	0.0912648	1.04	0.313794	1.22303	pos
3-Methoxytyramine	M168T155	168.102	154.7	0.0238235	C9H13NO2	C05587	7.94153e+07	3.60471e+07	118.9	2.65594e+07	1.32269e+07	112.36	2.99	1.58	0.096747	1.01	0.323401	1.08323	pos
Isopyridoxal	M168T174	168.063	174.5	13.5425	C8H9NO3	C06051	1.3127e+10	2.05341e+08	241.44	2.448e+07	1.47014e+07	93.5	536.23	9.07	0.0259609	1.59	0.151009	1.54754	pos
D-synephrine	M168T298	168.091	298.1	1.67492	C9H13NO2	C01869	1.21103e+08	9.56434e+07	83.37	6.29918e+07	4.12759e+07	101.41	1.92	0.94	0.218804	0.66	0.492263	0.804304	pos
Geranic acid	M169T466	169.123	465.6	1.93116	C10H16O2	C16461	1.3064e+08	1.2557e+08	58.02	6.17005e+07	6.29127e+07	50.52	2.12	1.08	0.19845	0.7	0.47217	0.946323	pos
(S)-4-Hydroxymandelate	M169T66	169.046	65.9	1.28262	C8H8O4	C03198	1.66699e+08	1.55737e+08	33.83	2.02365e+08	1.94718e+08	30.82	0.82	-0.28	0.314183	0.5	0.590519	0.680653	pos
8-Amino-7-oxononanoate	M170T295	170.117	294.7	23.713	C9H17NO3	C01092	9.23322e+07	6.59151e+07	87.4	8.25343e+07	7.80233e+07	25.36	1.12	0.16	0.706557	0.15	0.866427	0.245846	pos
3-Indoleacrylate	M170T514	170.06	513.5	24.3091	C11H9NO2	C21283	7.09125e+08	2.14768e+08	121.07	1.13211e+09	1.08349e+09	76.4	0.63	-0.67	0.222434	0.65	0.49673	0.775519	pos
Norepinephrine	M170T667	169.979	666.9	7.01905	C8H11NO3	C00547	5.43962e+08	5.03866e+08	50.68	5.77397e+08	5.20663e+08	80.05	0.94	-0.09	0.780598	0.11	0.905869	0.299842	pos
Limonene-1,2-diol	M171T141_2	171.149	140.8	0.269887	C10H18O2	C07276	1.88738e+07	2.20289e+07	47.66	1.39362e+07	1.25782e+07	53.51	1.35	0.44	0.427605	0.37	0.686901	0.647605	pos
3,4-Dihydroxyphenylglycol	M171T218	171.063	217.7	10.3821	C8H10O4	C05576	9.86481e+07	9.92184e+07	47.42	7.17154e+07	6.58029e+07	28.57	1.38	0.46	0.329285	0.48	0.604181	0.682371	pos
Tetrahydrodipicolinate	M171T567	171.064	566.7	4.82477	C7H9NO4	C03972	2.55439e+07	1.73625e+07	102.92	3.89132e+07	2.72506e+07	88.32	0.66	-0.61	0.39323	0.41	0.661776	0.544595	pos
Dihydroxyacetone phosphate	M171T655_2	171.149	654.8	0.725365	C3H7O6P	C00111	2.11134e+07	2.1319e+07	61.94	1.6559e+07	1.64376e+07	67.77	1.28	0.35	0.501973	0.3	0.741309	0.408849	pos
N-Butyryl-L-homoserine lactone	M172T287	172.096	287.2	3.34697	C8H13NO3	C11837	1.48824e+08	1.35901e+08	43.19	1.88206e+08	1.81212e+08	11.92	0.79	-0.34	0.151408	0.82	0.413709	1.00729	pos
2-Oxoarginine	M173T278	173.079	277.5	3.8557	C6H11N3O3	C03771	4.15798e+07	3.74039e+07	37.43	5.71531e+07	5.58789e+07	19.56	0.73	-0.46	0.0543149	1.27	0.231947	1.23829	pos
4-Quinolinecarboxylic acid	M173T292	173.044	291.8	23.6935	C10H7NO2	C06414	4.24786e+07	4.60091e+07	41.1	3.92435e+07	4.10912e+07	11.74	1.08	0.11	0.990297	0	0.99619	0.0045274	pos
Carglumic acid	M173T523_1	173.056	523.4	24.4667	C6H10N2O5	C05829	1.197e+07	6.29919e+06	129.53	2.04759e+07	1.97265e+07	67.77	0.58	-0.77	0.168194	0.77	0.43413	0.924435	pos
N(omega)-Hydroxyarginine	M173T523_2	173.096	523	20.6013	C6H14N4O3	C05933	7.38338e+06	9.06081e+06	54.41	1.07719e+07	1.1452e+07	53.21	0.69	-0.54	0.307287	0.51	0.582879	0.671964	pos
3-Dehydroshikimate	M173T669	172.977	668.8	1.35213	C7H8O5	C02637	7.45946e+06	3.82017e+06	90.77	6.99472e+07	6.47803e+07	79.63	0.11	-3.23	0.00204722	2.69	0.0304159	1.77751	pos
Iminoarginine	M173T93	173.092	93.4	0.338108	C6H12N4O2	C21026	1.65431e+08	1.65334e+08	30.69	2.10361e+08	1.96315e+08	35.97	0.79	-0.35	0.254196	0.59	0.530174	0.81922	pos
Norselegiline	M174T795	174.128	794.8	0.000645095	C12H15N	C15476	1.55402e+07	1.54527e+07	33.45	1.92384e+07	2.1754e+07	34.84	0.81	-0.31	0.445702	0.35	0.700945	0.605402	pos
L-Theanine	M175T142	175.108	141.5	2.75082	C7H14N2O3	C01047	3.9304e+07	1.29795e+07	124.99	2.18731e+07	1.1525e+07	97.55	1.8	0.85	0.724072	0.14	0.87566	0.222087	pos
cis-Aconitic acid	M175T176	175.023	176.4	1.79966	C6H6O6	C00417	7.47768e+07	3.13358e+06	165.99	7.29467e+07	7.05524e+06	213.98	1.03	0.04	0.835729	0.08	0.93104	0.14995	pos
N-Formyl-L-glutamic acid	M175T406_1	175.034	405.8	0.0833686	C6H9NO5	C01045	1.80352e+07	1.44646e+07	61.82	1.44536e+07	1.36858e+07	64.51	1.25	0.32	0.466718	0.33	0.717761	0.425953	pos
Demethylated antipyrine	M175T408	175.087	407.7	1.65033	C10H10N2O	C13008	2.48602e+07	2.29464e+07	42.29	3.65377e+07	3.58899e+07	27.52	0.68	-0.56	0.0822028	1.09	0.295411	1.1301	pos
1H-Indole-3-acetamide	M175T708_2	175.148	708.2	0.221492	C10H10N2O	C02693	5.32084e+07	5.24085e+07	10.44	4.95992e+07	4.85824e+07	11.94	1.07	0.1	0.2853	0.54	0.560746	0.761545	pos
Gramine	M175T722	175.123	722.3	0.425119	C11H14N2	C08304	4.66195e+07	4.10575e+07	46.8	2.20367e+08	1.0031e+08	103.45	0.21	-2.24	0.0331246	1.48	0.17527	1.3957	pos
N-Methyltryptamine	M175T796	175.121	796.2	10.1415	C11H14N2	C06213	8.71234e+08	1.07893e+09	56.57	3.8027e+08	261630924	96.33	2.29	1.2	0.0813465	1.09	0.293822	1.17793	pos
L-Arginine	M175T81	175.119	80.8	0.13705	C6H14N4O2	C00062	4.1271e+08	1.6431e+08	117.4	3.99576e+08	2.30244e+08	110.45	1.03	0.05	0.957122	0.02	0.983452	0.0501653	pos
Indoleacetic acid	M176T794	176.071	794	1.11019	C10H9NO2	C00954	1.99532e+08	1.95684e+08	23.09	1.27104e+08	1.12302e+08	29.06	1.57	0.65	0.00932642	2.03	0.0820073	1.58076	pos
2-Hydroxy-3-oxoadipate	M177T339	177.055	339	1.05656	C6H8O6	C03217	1.08277e+07	9.22073e+06	78.82	1.06014e+07	8.22444e+06	86.45	1.02	0.03	0.843358	0.07	0.934277	0.109882	pos
3-Dehydro-scyllo-inosose	M177T65	177.054	64.7	6.98161	C6H8O6	C21643	7.50257e+07	4.92526e+07	77.72	8.60527e+07	5.41463e+07	83.52	0.87	-0.2	0.69273	0.16	0.859076	0.321527	pos
D-Alanyl-D-serine	M177T95_1	177.087	95.4	0.70022	C6H12N2O4	C19719	9.29329e+07	76590381	78.66	1.58795e+08	9.60261e+07	105.04	0.59	-0.77	0.27705	0.56	0.553371	0.729043	pos
(2Z,4S,5R)-2-Amino-4,5,6-trihydroxyhex-2-enoate	M178T276	178.086	275.6	0.277586	C6H11NO5	C20844	9.11588e+07	1.48443e+07	199.06	1.85756e+08	1.07044e+08	122.55	0.49	-1.03	0.110138	0.96	0.348278	1.02548	pos
Gluconolactone	M179T141	179.045	141.3	0.122176	C6H10O6	C00198	1.49505e+08	1.53584e+08	56.58	5.95328e+07	5.79409e+07	35.96	2.51	1.33	0.0158769	1.8	0.113908	1.55112	pos
1-Keto-D-chiro-inositol	M179T219	179.037	218.5	0.823975	C6H10O6	C20251	1.96154e+07	1.42502e+07	89.39	2.37943e+07	1.63388e+07	128.37	0.82	-0.28	0.666929	0.18	0.843666	0.389423	pos
beta-D-Glucosamine	M179T273	179.079	273	1.11682	C6H13NO5	C08349	1.14732e+08	1.03027e+08	73.1	1.16794e+08	9.37959e+07	83.21	0.98	-0.03	0.781572	0.11	0.906289	0.157123	pos
(Z)-4-Hydroxy-6-dodecenoic acid lactone	M179T540	179.07	540.4	0.829479	C6H10O6	C03107	2.46415e+07	1.71975e+07	114.77	1.17133e+08	6.62506e+07	122.86	0.21	-2.25	0.0184871	1.73	0.124806	1.49444	pos
Geranyl acetate	M179T596	179.143	595.7	23.0765	C12H20O2	C09861	1.2935e+07	1.16824e+07	63.7	1.51286e+07	1.2039e+07	65.64	0.86	-0.23	0.677454	0.17	0.849601	0.230139	pos
Metanephrine	M180T274	180.102	274.4	9.65985	C10H15NO3	C05588	4.48782e+07	2.70394e+07	78.51	5.93548e+07	5.09404e+07	46.8	0.76	-0.4	0.241182	0.62	0.516322	0.805878	pos
Glucosamine	M180T315	180.088	314.8	7.35196	C6H13NO5	C00329	7.79536e+08	8.39427e+08	59.29	1.04465e+09	1.12639e+09	29.06	0.75	-0.42	0.201668	0.7	0.476108	0.875316	pos
(R)-Salsolinol	M180T605	180.102	605.2	0.977226	C10H13NO2	C09642	1.38146e+08	1.34488e+08	37.65	4.72767e+07	4.27319e+07	57.86	2.92	1.55	0.00386921	2.41	0.0468187	1.76339	pos
myo-Inositol	M180T800	180.067	800.4	19.4372	C6H12O6	C00137	1.49334e+09	1.24234e+09	30.88	6.66251e+09	3.70622e+09	88.26	0.22	-2.16	0.0191599	1.72	0.127353	1.58414	pos
5-Methylthioribose	M181T179	181.053	178.9	0.132558	C6H12O4S	C03089	1.58035e+08	1.42867e+08	37.29	8.72832e+08	8.63744e+08	49.06	0.18	-2.47	9.45192e-05	4.02	0.00428677	2.03148	pos
Theophylline	M181T349	181.072	349.3	0.132544	C7H8N4O2	C07130	5.37481e+08	1.43069e+08	129.66	3.08308e+08	2.27625e+08	101.26	1.74	0.8	0.945536	0.02	0.978928	0.0527461	pos
4-Hydroxyphenylpyruvic acid	M181T394	181.044	394.5	22.1255	C9H8O4	C01179	3.27498e+07	8.64588e+06	123.4	1.91109e+07	5.01506e+06	186.21	1.71	0.78	0.370592	0.43	0.643347	0.670539	pos
1D-chiro-Inositol	M181T572	181.084	571.9	7.39509	C6H12O6	C19891	1.89528e+08	1.27477e+08	121.54	1.34271e+08	3.23859e+07	164.48	1.41	0.5	0.400139	0.4	0.666425	0.611014	pos
D-Fructose	M181T775	181.014	774.6	2.52147	C6H12O6	C00095	6.58939e+08	3.6945e+08	79.54	6.31147e+09	5.94013e+09	94.02	0.1	-3.26	0.0116429	1.93	0.093873	1.5944	pos
D-Galactose	M181T801	181.07	801	5.94247	C6H12O6	C00124	1.00073e+08	1.15387e+08	48.54	2.05731e+08	7.25033e+07	124.56	0.49	-1.04	0.596705	0.22	0.801186	0.365127	pos
Beta-Tyrosine	M182T241	182.081	240.6	0.00906134	C9H11NO3	C04368	1.22286e+08	1.16391e+08	46.52	1.50251e+08	1.33165e+08	27.61	0.81	-0.3	0.239142	0.62	0.51396	0.793433	pos
1-Methyluric acid	M183T281	183.051	281.4	0.139093	C6H6N4O3	C16359	7.36766e+08	4.82457e+08	78.28	4.94223e+08	4.57003e+08	55.77	1.49	0.58	0.490238	0.31	0.732685	0.497844	pos
Homovanillic acid	M183T762	182.985	761.6	0.309868	C9H10O4	C05582	5.38955e+08	5.91633e+08	34.27	2.07998e+09	2.53587e+09	60.25	0.26	-1.95	0.0173535	1.76	0.120248	1.41578	pos
4-Pyridoxic acid	M184T274_3	184.06	273.7	1.26726	C8H9NO4	C00847	7.97516e+08	2.55349e+08	177.62	5.04648e+08	5.37328e+08	42.01	1.58	0.66	0.543464	0.26	0.766465	0.433039	pos
Choline sulfate	M184T325	184.061	325.4	14.0488	C5H13NO4S	C00919	2.91301e+07	2.70923e+07	50.84	6.20827e+07	3.89701e+07	108.39	0.47	-1.09	0.176876	0.75	0.444266	0.903322	pos
Phosphorylcholine	M184T82	184.074	81.6	0.000443431	C5H15NO4P	C00588	1.25499e+08	6.07396e+07	146.96	7.32817e+07	4.84017e+07	95.28	1.71	0.78	0.813136	0.09	0.92055	0.214913	pos
Phosphoserine	M185T172	185.165	172.4	1.29063	C3H8NO6P	C01005	1.48871e+07	1.24256e+07	97.72	6.9704e+06	1.06223e+06	207.45	2.14	1.09	0.161581	0.79	0.426173	0.899274	pos
Sebacic acid	M185T598	185.117	597.9	7.33589	C10H18O4	C08277	1.21697e+07	7.65031e+06	100.19	2.44403e+07	1.74534e+07	94.87	0.5	-1.01	0.137059	0.86	0.393311	0.994158	pos
(2S,4S)-4-Hydroxy-2,3,4,5-tetrahydrodipicolinate	M187T277	187.058	276.5	0.272062	C7H9NO5	C20258	1.7505e+08	1.16652e+08	104.39	9.562e+07	9.2518e+07	62.34	1.83	0.87	0.654956	0.18	0.838522	0.398077	pos
5-Guanidino-3-methyl-2-oxopentanoate	M187T322	187.094	322.1	6.94836	C7H13N3O3	C20234	7.26241e+07	6.94724e+07	28.99	5.54474e+07	5.55933e+07	33.17	1.31	0.39	0.127355	0.89	0.376511	1.09413	pos
Undecanoic acid	M187T36	186.956	36	1.16216	C11H22O2	C17715	2.29029e+07	1.523e+07	64.66	2.64055e+07	2.70246e+07	21.68	0.87	-0.21	0.327192	0.49	0.601897	0.692531	pos
Lipoamide	M188T160	188.055	160.3	13.4748	C8H15NOS2	C00248	3.51709e+07	2.10678e+07	97.39	4.0126e+07	4.06849e+07	38.09	0.88	-0.19	0.340287	0.47	0.614646	0.663631	pos
(Z)-But-1-ene-1,2,4-tricarboxylate	M188T175	188.035	174.9	15.9545	C7H8O6	C04002	6.99067e+07	6.84562e+07	55.21	6.39998e+07	6.18373e+07	38.1	1.09	0.13	0.977441	0.01	0.990579	0.0476991	pos
2-Keto-6-acetamidocaproate	M188T179	188.092	178.9	1.19091	C8H13NO4	C05548	2.55518e+07	2.49271e+07	60.18	1.27681e+08	4.93883e+07	144.41	0.2	-2.32	0.095028	1.02	0.320497	1.20764	pos
N-Alpha-acetyllysine	M188T382	188.071	382.5	1.24233	C8H16N2O3	C12989	1.31765e+08	1.19865e+08	39.21	2.0078e+08	1.81454e+08	65.42	0.66	-0.61	0.354421	0.45	0.628599	0.716472	pos
N8-Acetylspermidine	M188T80_2	188.175	80.5	3.01648	C9H21N3O	C01029	9.64553e+07	8.58387e+07	68.53	1.92569e+08	2.01e+08	27.12	0.5	-1	0.0222505	1.65	0.13988	1.43398	pos
N6-Acetyl-L-lysine	M189T141_5	189.123	140.7	2.89068	C8H16N2O3	C02727	1.05994e+08	1.09301e+08	33.1	1.52492e+09	1.36251e+09	40.43	0.07	-3.85	2.73202e-07	6.56	0.000164795	2.1562	pos
Glycylleucine	M189T312	189.124	312.5	0.655656	C8H16N2O3	C02155	8.72496e+06	8673091	77.94	1.31215e+07	1.35587e+07	58.27	0.66	-0.59	0.343352	0.46	0.617411	0.663961	pos
Homo-L-arginine	M189T86	189.134	86.2	1.45928	C7H16N4O2	C01924	2.72646e+08	3.14404e+08	42.96	3.89033e+08	3.38838e+08	37.32	0.7	-0.51	0.207961	0.68	0.481343	0.856159	pos
Diaminopimelic acid	M190T359	190.107	359.1	0.0324174	C7H14N2O4	C00666	3.65778e+07	2.96291e+07	65.63	2.1509e+08	1.66936e+08	55.13	0.17	-2.56	0.000775808	3.11	0.0164488	1.80781	pos
N-Acetylglutamic acid	M190T751	190.05	750.5	2.54473	C7H11NO5	C00624	1.65784e+07	1.52436e+07	61.55	5.846e+06	7.24384e+06	44.55	2.84	1.5	0.0254783	1.59	0.149685	1.41193	pos
Homocitrulline	M190T93	190.118	92.8	0.925739	C7H15N3O3	C02427	1.85129e+08	1.77571e+08	33.46	2.42539e+08	2.32323e+08	38.92	0.76	-0.39	0.239421	0.62	0.514336	0.814442	pos
N-Amidino-L-glutamate	M190T97_2	190.083	97.2	5.38711	C6H11N3O4	C03140	9.94705e+07	7.23931e+07	62.99	2.1706e+08	2.06745e+08	37.44	0.46	-1.13	0.0147768	1.83	0.109166	1.50575	pos
Cytisine	M191T181	191.117	180.6	2.52895	C11H14N2O	C10763	1.57373e+08	1.16844e+08	76.15	1.76111e+08	1.75579e+08	76.67	0.89	-0.16	0.774626	0.11	0.902733	0.120526	pos
trans-Isoasarone	M191T629	191.107	628.8	22.1552	C12H16O3	C17846	4.50344e+07	2.99196e+07	114.46	6.47378e+06	5.59702e+06	64.73	6.96	2.8	0.0160738	1.79	0.114667	1.48424	pos
Isocitric acid	M192T99	192.033	98.7	0.884666	C6H8O7	C00311	6.80561e+07	5.40956e+07	84.58	8.80788e+07	9.36819e+07	52.46	0.77	-0.37	0.380977	0.42	0.650638	0.594537	pos
Isoscopoletin	M193T495	193.049	494.7	0.911684	C10H8O4	C18079	1.09872e+07	1.40553e+07	66.57	2.96695e+07	25594021	34.08	0.37	-1.43	0.0328035	1.48	0.174182	1.48681	pos
L-Dopachrome	M194T131	194.048	131.2	16.6147	C9H7NO4	C01693	1.53579e+07	1.70808e+07	79.93	1.5171e+07	1.52131e+07	53.72	1.01	0.02	0.630443	0.2	0.823391	0.369076	pos
3-Hydroxy-5-methyl-L-tyrosine	M194T500	194.081	500.3	18.2093	C10H13NO4	C20801	4.18458e+07	4.8559e+07	62.38	5.88795e+07	5.79658e+07	33.79	0.71	-0.49	0.208828	0.68	0.481886	0.872086	pos
2-Amino-2-deoxy-D-gluconate	M195T262	195.077	262.2	11.2776	C6H13NO6	C03752	1.27462e+08	8.32385e+07	111.13	7.11908e+08	2.51065e+08	168.73	0.18	-2.48	0.0598179	1.22	0.244211	1.19626	pos
Caffeine	M195T397	195.089	396.9	1.45134	C8H10N4O2	C07481	4.39031e+08	1.00422e+08	166.61	4.99926e+08	1.48504e+08	166.97	0.88	-0.19	0.513598	0.29	0.747356	0.462502	pos
Leucodopachrome	M195T404	195.065	403.6	2.47658	C9H9NO4	C05604	3.41697e+07	1.83863e+07	130.16	3.55433e+07	3.59241e+07	50.97	0.96	-0.06	0.408973	0.39	0.673733	0.538479	pos
Neocnidilide	M195T508	195.138	508.5	0.104414	C12H18O2	C17002	6.73602e+07	7.4759e+07	44.2	6.81237e+07	7.3687e+07	32.07	0.99	-0.02	0.760261	0.12	0.894896	0.177835	pos
3-Methyl-L-tyrosine	M195T789	195.102	789.4	0.0192185	C10H13NO3	C20800	5.56221e+07	5.74749e+07	15.64	5.74227e+07	5.57443e+07	15.53	0.97	-0.05	0.732684	0.14	0.880038	0.265753	pos
Dopaquinone	M196T154	196.071	154.5	0.0136968	C9H9NO4	C00822	1.61089e+08	1.0034e+08	79.84	5.61443e+08	2.8305e+08	125.69	0.29	-1.8	0.106609	0.97	0.341928	1.14914	pos
Phenazopyridine	M196T359_3	196.094	359.1	0.683345	C11H11N5	C07429	7.21726e+07	4.09733e+07	120.47	3.20534e+08	2.61944e+08	94.06	0.23	-2.15	0.0538618	1.27	0.231129	1.30346	pos
3-(3,4-Dihydroxyphenyl)pyruvate	M197T160	197.053	160.3	0.00532752	C9H8O5	C04045	8.96789e+07	9.69867e+07	52.15	6.09419e+08	4.96732e+08	55.07	0.15	-2.76	0.00017903	3.75	0.00642442	1.9253	pos
1,7-Dimethyluric acid	M197T335	197.067	335.5	0.0110893	C7H8N4O3	C16356	2.84239e+08	1.10044e+08	124.51	2.28139e+08	1.45874e+08	94.33	1.25	0.32	0.907773	0.04	0.962394	0.0853433	pos
Selenomethionine	M198T748_1	198.018	747.8	0.939564	C5H11NO2Se	C05335	7.74974e+06	6.74769e+06	85.64	1.48626e+07	8.61198e+06	91.78	0.52	-0.94	0.206772	0.68	0.480483	0.863372	pos
3-(3,4-Dihydroxyphenyl)lactic acid	M199T142	199.068	142.4	24.2643	C9H10O5	C01207	9.63371e+07	1.0748e+08	53.38	9.70489e+07	8.55847e+07	60.57	0.99	-0.01	0.920081	0.04	0.968574	0.00222362	pos
Vanillylmandelic acid	M199T301	199.058	300.6	12.4386	C9H10O5	C05584	6.76245e+07	6.3692e+07	60.36	6.75002e+07	6.157e+07	27.51	1	0	0.643284	0.19	0.831431	0.340946	pos
gamma-Glutamyl-beta-aminopropiononitrile	M200T286	200.092	286	1.0492	C8H13N3O3	C06114	1.63565e+08	1.54424e+08	53.94	2.0264e+08	2.06916e+08	23.63	0.81	-0.31	0.240747	0.62	0.515874	0.813509	pos
Dodecanoic acid	M200T584	199.987	584	2.91012	C12H24O2	C02679	7.37121e+08	6.9546e+08	21.19	1.74924e+08	1.71058e+08	52.72	4.21	2.08	0.00215859	2.67	0.0314047	1.95358	pos
4-Fumarylacetoacetate	M201T216	201.037	216	12.8136	C8H8O6	C01061	1.31317e+07	1.00575e+07	80.6	4.56492e+07	3.51588e+07	100.54	0.29	-1.8	0.0248687	1.6	0.148376	1.35388	pos
D-Erythrose 4-phosphate	M201T218	201.019	218.2	16.4163	C4H9O7P	C00279	5.81663e+07	2.36933e+07	125.57	1.29626e+08	1.00939e+08	111.16	0.45	-1.16	0.604629	0.22	0.806759	0.3054	pos
2-trans,6-trans-Farnesal	M203T565	203.18	564.5	21.3309	C15H24O	C03461	9.74548e+06	1.06619e+07	80.7	1.09068e+07	7.14186e+06	102.93	0.89	-0.16	0.885248	0.05	0.954391	0.0853729	pos
Spermine	M203T62	203.222	62.1	3.32641	C10H26N4	C00750	1.85664e+08	4.76566e+07	150.18	8.0639e+07	3.63266e+07	115.54	2.3	1.2	0.932185	0.03	0.973417	0.0506057	pos
O-Acetylcarnitine	M205T188	205.137	188.4	28.3908	C9H18NO4	C02571	6.6172e+07	6.47562e+07	68.9	1.24314e+08	8.43294e+07	111.85	0.53	-0.91	0.642883	0.19	0.831265	0.306165	pos
Diglycidyl resorcinol ether	M205T484	205.088	483.8	28.4464	C12H14O4	C19228	6.59224e+07	4.59142e+07	79.09	9.51485e+06	6.98196e+06	104.34	6.93	2.79	0.00172724	2.76	0.0270967	1.79028	pos
Homocitric acid	M206T325	206.042	324.9	1.94135	C7H10O7	C01251	5.98159e+07	5.17899e+07	53.36	1.71544e+08	7.91713e+07	140.17	0.35	-1.52	0.163259	0.79	0.428657	0.922038	pos
Xanthurenic acid	M206T350	206.044	350.4	0.133036	C10H7NO4	C02470	2.2601e+08	1.85304e+08	74.12	3.01868e+08	3.40963e+08	43.05	0.75	-0.42	0.348704	0.46	0.622211	0.632332	pos
Indolelactic acid	M206T503	206.08	503	5.22127	C11H11NO3	C02043	3.06361e+08	1.83554e+08	113.84	3.33755e+08	2.81271e+08	57.53	0.92	-0.12	0.368559	0.43	0.641893	0.641328	pos
Homoisocitrate	M207T498	207.051	497.8	2.9318	C7H10O7	C05662	1.31215e+07	9.55393e+06	78.14	9.71016e+06	1.00448e+07	45.3	1.35	0.43	0.677022	0.17	0.849287	0.277952	pos
3-Benzylmalic acid	M207T549	207.065	548.6	19.4822	C11H12O5	C20654	5.74028e+06	5.4901e+06	61.47	3.4034e+07	2.10969e+07	86.18	0.17	-2.57	0.00278312	2.56	0.0375986	1.70232	pos
N-Acetyl-L-phenylalanine	M208T486	208.097	485.8	0.849577	C11H13NO3	C03519	1.15077e+08	1.26695e+08	46.23	8.20452e+07	9.22891e+07	39.64	1.4	0.49	0.325364	0.49	0.600617	0.643077	pos
L-Kynurenine	M209T295	209.092	295	0.108791	C10H12N2O3	C00328	4.56293e+08	4.6066e+08	45.55	7.56045e+08	5.60615e+08	66.88	0.6	-0.73	0.158832	0.8	0.422846	0.954513	pos
Genipin	M209T407	209.081	407.5	19.7723	C11H14O5	C09780	1.72595e+07	8.76913e+06	133.61	4.43776e+07	6.83113e+06	213.5	0.39	-1.36	0.977877	0.01	0.990767	0.00787944	pos
Isoelemicin	M209T476	209.117	476.5	1.07117	C12H16O3	C16975	1.48902e+08	1.3287e+08	55.34	7.58335e+07	3.80379e+07	89.44	1.96	0.97	0.0629478	1.2	0.251541	1.27216	pos
6-Methoxymellein	M209T625	209.081	625	0.363496	C11H12O4	C02381	1.17215e+07	9.85845e+06	69.18	1.78738e+07	1.31952e+07	86.31	0.66	-0.61	0.314207	0.5	0.590519	0.706757	pos
Myristoleic acid	M209T775	209.19	775.4	18.3279	C14H26O2	C08322	1.43255e+07	1.40669e+07	12.92	1.6673e+07	16229600	19.38	0.86	-0.22	0.155789	0.81	0.419706	0.907161	pos
Jasmonic acid	M211T523	211.133	522.5	0.165393	C12H18O3	C08491	1.78309e+07	1.62235e+07	62.16	1.83298e+08	1.76893e+08	39.07	0.1	-3.36	1.48762e-05	4.83	0.00141668	2.05567	pos
3-(3,4-Dihydroxy-5-methoxy)-2-propenoic acid	M211T651	211.059	650.6	2.47493	C10H10O5	C05619	7.85178e+06	8.48229e+06	34.14	13083372	1.0729e+07	67.67	0.6	-0.74	0.23474	0.63	0.50961	0.809985	pos
Baclofen	M214T80	214.056	80.2	21.9022	C10H12ClNO2	C06841	1.88189e+08	1.80598e+08	26.06	1.81883e+08	1.58969e+08	67.68	1.03	0.05	0.531774	0.27	0.758313	0.444236	pos
Deoxyribose 1-phosphate	M214T86	214.022	86.2	9.34474	C5H11O7P	C00672	2.81593e+07	2.40767e+07	97.26	5.91657e+07	3.39441e+07	93.27	0.48	-1.07	0.188968	0.72	0.460175	0.896573	pos
12-Hydroxydodecanoic acid	M216T614	216.196	614	0.96619	C12H24O3	C08317	5.89638e+06	6.18548e+06	40.83	6.02574e+06	4.24948e+06	93.38	0.98	-0.03	0.669487	0.17	0.845052	0.285582	pos
N-a-Acetylcitrulline	M218T176	218.114	176.3	1.02699	C8H15N3O4	C15532	3.45735e+07	2.36396e+07	101.74	3.65266e+07	2.9885e+07	63.08	0.95	-0.08	0.54057	0.27	0.764871	0.450654	pos
D-Lysopine	M219T302	219.134	302	0.476062	C9H18N2O4	C04020	1.21324e+07	1.16296e+07	84.63	2.43233e+07	1.69686e+07	85.84	0.5	-1	0.170536	0.77	0.436795	0.873755	pos
Capsidiol	M219T578	219.174	578.1	0.000339551	C15H24O2	C09627	2.36282e+07	2.21018e+07	42.16	2.45633e+07	2.08689e+07	34.65	0.96	-0.06	0.771968	0.11	0.90129	0.173135	pos
5-Hydroxyindolepyruvate	M220T274	220.064	273.7	0.128747	C11H9NO4	C05646	2.18634e+08	1.27891e+08	102.38	3.85313e+08	3.72754e+08	78.03	0.57	-0.82	0.663323	0.18	0.842262	0.28402	pos
Pantothenic acid	M220T320	220.118	319.6	0.34527	C9H17NO5	C00864	1.44588e+08	1.09733e+08	52.2	2.47301e+08	1.51501e+08	90.18	0.58	-0.77	0.325884	0.49	0.600617	0.786685	pos
Pyrimidodiazepine	M221T347	221.092	346.9	0.196612	C9H11N5O2	C02587	7.55773e+06	5.75235e+06	80.84	8.3614e+06	7.57393e+06	33.56	0.9	-0.15	0.379825	0.42	0.65005	0.664622	pos
1-Benzyl-1,2,3,4-tetrahydroisoquinoline	M223T372	223.142	372.3	25.0962	C16H17N	C05201	5.36044e+06	3.20913e+06	99.82	4.33661e+07	2.7407e+07	111.6	0.12	-3.02	0.00949912	2.02	0.0831621	1.63863	pos
Apiole	M223T587	223.096	587.1	2.13361	C12H14O4	C10429	1.46985e+07	1.06949e+07	95.94	2.8302e+07	3.16512e+07	45.9	0.52	-0.95	0.129655	0.89	0.380722	1.01423	pos
Coniferyl acetate	M223T77_1	223.094	76.7	11.9948	C12H14O4	C20225	1.65228e+07	1.45353e+07	48.58	2.45691e+07	2.14862e+07	44.99	0.67	-0.57	0.10867	0.96	0.345725	1.07125	pos
Dioxacarb	M224T489	224.093	489.1	3.67705	C11H13NO4	C18953	3.69325e+06	1.2408e+06	119.71	1.23759e+07	3707240	120.67	0.3	-1.74	0.125904	0.9	0.37476	1.07305	pos
Cerulenin	M224T655	224.128	655.1	0.446173	C12H17NO3	C12058	3.52565e+07	2.56916e+07	97.67	4.66212e+07	5.01591e+07	43.9	0.76	-0.4	0.285214	0.54	0.560669	0.735513	pos
Methyl jasmonate	M224T827	223.988	827.2	1.83143	C13H20O3	C11512	8.51825e+07	9.14782e+07	36.16	6.47513e+08	6.32294e+08	12.57	0.13	-2.93	0.000162702	3.79	0.00602096	2.09179	pos
Hydroxykynurenine	M225T380	225.025	380.3	21.2997	C10H12N2O4	C02794	4.22303e+07	3.59316e+07	32.49	4.28407e+07	4.43077e+07	62.15	0.99	-0.02	0.574711	0.24	0.788594	0.366991	pos
Sinapic acid	M225T403	225.074	403.1	8.66153	C11H12O5	C00482	5.14556e+07	4.31691e+07	77.19	8.52636e+07	5.37156e+07	86.51	0.6	-0.73	0.245145	0.61	0.520125	0.758487	pos
Isochorismate	M226T105	226.069	105.1	1.22087	C10H10O6	C00885	8.41087e+07	4.62299e+07	118.42	1.57763e+07	1.62608e+07	56.48	5.33	2.41	0.0127959	1.89	0.0996573	1.53033	pos
Cytidine	M226T293	226.082	293.4	16.9585	C9H13N3O5	C00475	3.08749e+07	2.85189e+07	70.97	3.96161e+07	4.12996e+07	31.25	0.78	-0.36	0.273698	0.56	0.55059	0.769252	pos
Prephenate	M226T320	226.069	319.8	0.0282469	C10H10O6	C00254	2.66475e+07	2.40071e+07	54.04	2.71962e+07	2.73697e+07	50.18	0.98	-0.03	0.961113	0.02	0.984117	0.0329335	pos
L-Glutamic acid 5-phosphate	M227T281	227.015	281.4	5.30729	C5H10NO7P	C03287	2.40145e+07	1.93402e+07	75.6	8.98036e+06	7.35249e+06	69.64	2.67	1.42	0.031594	1.5	0.170032	1.36788	pos
4,4'-Dihydroxy-alpha-methylstilbene	M227T314	227.103	313.8	17.9478	C15H14O2	C13632	2.95808e+08	2.7625e+08	58.76	3.85262e+08	3.84221e+08	29.8	0.77	-0.38	0.233471	0.63	0.508135	0.838052	pos
L-Arogenate	M227T565	227.081	565.3	8.80749	C10H13NO5	C00826	6.07308e+06	6.09452e+06	29.26	3.03971e+06	3.01036e+06	46.69	2	1	0.0108369	1.97	0.0897302	1.56172	pos
Carnosine	M227T794	226.952	793.9	14.4214	C9H14N4O3	C00386	5.66862e+07	5.11918e+07	70.25	1.09612e+08	1.06644e+08	81.28	0.52	-0.95	0.388139	0.41	0.657286	0.538715	pos
Mevalonic acid-5P	M229T290	229.032	290.3	0.167144	C6H13O7P	C01107	1.8779e+07	2.0164e+07	75.62	1.51629e+07	6.9723e+06	119.78	1.24	0.31	0.547515	0.26	0.769031	0.45184	pos
Traumatic Acid	M229T508	229.141	507.5	7.50903	C12H20O4	C16308	1.19714e+07	4.51946e+06	117.67	1.7397e+07	1.95692e+07	62.12	0.69	-0.54	0.26195	0.58	0.538359	0.834346	pos
Deoxyuridine	M229T532	229.087	531.8	19.7471	C9H12N2O5	C00526	1.53748e+07	9.08743e+06	91.97	1.51873e+07	1.37296e+07	72.78	1.01	0.02	0.894542	0.05	0.957427	0.0498901	pos
D-Octopine	M229T89	229.13	88.8	18.0425	C9H18N4O4	C04137	2.44307e+08	2.21952e+08	49.34	2.72284e+08	2.37211e+08	41.31	0.9	-0.16	0.577178	0.24	0.789822	0.389603	pos
Dodecanedioic acid	M231T508	231.159	507.9	0.103825	C12H22O4	C02678	4.40404e+07	4.56529e+07	48.07	4.21223e+07	4.63831e+07	44.54	1.05	0.06	0.948989	0.02	0.979601	0.108737	pos
N2-Succinyl-L-glutamic acid 5-semialdehyde	M232T175	232.087	174.9	25.094	C9H13NO6	C05932	3.37145e+07	4.14563e+06	202.78	1.39533e+07	1.11633e+07	82.07	2.42	1.27	0.724579	0.14	0.875685	0.210972	pos
Butyryl-L-carnitine	M232T318_2	232.155	318.2	0.000456269	C11H21NO4	C02862	3.6016e+09	3.53888e+09	52.51	8.2106e+09	6.58995e+09	70.6	0.44	-1.19	0.116885	0.93	0.359164	1.12715	pos
N2-Succinyl-L-ornithine	M232T356	232.124	355.6	11.7351	C9H16N2O5	C03415	9.7873e+06	9.08326e+06	21.84	9.31606e+06	9.52951e+06	17.1	1.05	0.07	0.694414	0.16	0.859927	0.337791	pos
4-(Glutamylamino) butanoate	M233T142	233.113	141.9	1.61295	C9H16N2O5	C15767	1.52701e+07	1.2807e+07	88.09	2.0844e+07	1.7231e+07	42.9	0.73	-0.45	0.19638	0.71	0.469293	0.904727	pos
Isoalantolactone	M233T559	233.154	559	0	C15H20O2	C09484	3.59281e+06	3.55061e+06	76.88	2.75094e+06	1.59079e+06	115.79	1.31	0.39	0.482698	0.32	0.727851	0.506997	pos
Confertifolin	M235T579	235.17	579.5	0.728045	C15H22O2	C09376	1.30056e+07	1.11514e+07	75.3	3.18532e+07	3.1525e+07	33.59	0.41	-1.29	0.0138702	1.86	0.104646	1.52252	pos
L-Formylkynurenine	M237T301_2	237.086	301.3	3.27306	C11H12N2O4	C02700	5.23123e+07	4.21323e+07	69.25	6.86941e+07	5.26578e+07	49.97	0.76	-0.39	0.306191	0.51	0.581623	0.733045	pos
8-Amino-3,8-dideoxy-D-manno-octulosonate	M237T499	237.112	498.6	27.7337	C8H15NO7	C21333	3.99634e+07	2.57964e+07	110.2	7.62149e+08	8.38485e+07	220.66	0.05	-4.25	0.104002	0.98	0.337884	1.12832	pos
Anhalonine	M237T76_2	237.121	76.4	8.95856	C13H19NO3	C16705	2.6883e+07	2.36334e+07	33.88	2.75495e+07	2.42878e+07	56.3	0.98	-0.04	0.78746	0.1	0.908877	0.167752	pos
Anserine	M241T81_2	241.129	81.3	1.97405	C10H16N4O3	C01262	7.23196e+07	2.07211e+07	136.22	1.47845e+07	1.11156e+07	81.73	4.89	2.29	0.560083	0.25	0.779335	0.454968	pos
Lumichrome	M242T696	242.284	696.4	2.13325	C12H10N4O2	C01727	7.53833e+06	2.83353e+06	108.21	2.13914e+07	1.42078e+07	105.2	0.35	-1.5	0.314935	0.5	0.591363	0.616787	pos
beta-Alanyl-L-arginine	M245T278	245.149	277.5	0.0596632	C9H19N5O3	C05340	6.03698e+07	4.96302e+07	60.97	7.36195e+07	6.81103e+07	56.48	0.82	-0.29	0.583399	0.23	0.793426	0.466652	pos
Biotin	M245T301	245.096	300.6	0.0495063	C10H16N2O3S	C00120	8.00484e+07	8.59183e+07	59.13	7.4921e+07	6.46364e+07	53.75	1.07	0.1	0.766438	0.12	0.898311	0.246682	pos
N-Acetyl-D-tryptophan	M247T334	247.129	334.3	0.863054	C13H14N2O3	C03137	2.44481e+09	2.07877e+09	78.37	1.49271e+09	1.1142e+09	61.12	1.64	0.71	0.533108	0.27	0.759496	0.456846	pos
Lenticin	M247T383	247.144	382.5	1.52138	C14H18N2O2	C09213	1.52628e+08	1.02979e+08	67.16	2.47162e+08	2.69404e+08	65.5	0.62	-0.7	0.355112	0.45	0.62927	0.705126	pos
Phenylacetylglutamine	M247T520	247.106	519.6	9.85002	C13H16N2O4	C04148	2.48761e+08	8.14413e+07	129.13	343986095	2.96465e+08	71.25	0.72	-0.47	0.199286	0.7	0.473236	0.843356	pos
Lupanine	M249T297	249.196	297.5	0.0963097	C15H24N2O	C10772	3.12694e+09	2.51945e+09	72.37	4.52288e+09	4.06527e+09	71.48	0.69	-0.53	0.551461	0.26	0.772058	0.477434	pos
Pyrimethamine	M249T314	249.084	313.8	23.5904	C12H13ClN4	C07391	3.19969e+08	3.04742e+08	53.94	3.90528e+08	4.02507e+08	26.64	0.82	-0.29	0.287848	0.54	0.562769	0.762362	pos
Dapsone	M249T547	249.073	547.1	14.9514	C12H12N2O2S	C07666	6.96648e+07	8.09939e+07	70.48	1.16963e+08	7.95881e+07	75.83	0.6	-0.75	0.22539	0.65	0.499075	0.835847	pos
Abscisic alcohol	M251T572	251.162	572.1	3.26969	C15H22O3	C13456	9.53352e+06	1.07907e+07	39.49	1.88806e+07	1.32155e+07	80.94	0.5	-0.99	0.383199	0.42	0.652678	0.648322	pos
Neopterin	M254T141	254.088	141.3	1.87337	C9H11N5O4	C05926	5.37922e+07	5.39094e+07	68.59	2.76669e+07	2.73453e+07	53.94	1.94	0.96	0.326527	0.49	0.601276	0.697999	pos
10-Hydroxycarbazepine	M254T275	254.112	275.1	23.6117	C15H14N2O2	C07493	8.81603e+07	7.15475e+07	92.47	3.59157e+09	1.16112e+09	173.73	0.02	-5.35	0.000988798	3	0.0191125	1.81098	pos
Dyphylline	M254T400	254.101	399.5	0.64035	C10H14N4O4	C07819	7.08623e+07	7.72762e+07	59.61	1.16853e+08	1.14409e+08	30.66	0.61	-0.72	0.145402	0.84	0.404866	1.02633	pos
Daidzein	M255T430	255.065	429.8	1.86619	C15H10O4	C10208	3.51151e+06	2.51942e+06	71.65	1.32685e+07	1.26902e+07	85.8	0.26	-1.92	0.101454	0.99	0.332812	1.14452	pos
7,8-Dihydromonapterin	M256T140	256.092	139.5	2.05716	C9H13N5O4	C21008	2.22797e+08	1.09344e+08	116.98	6.81465e+07	6.69218e+07	23.04	3.27	1.71	0.274084	0.56	0.550841	0.825904	pos
(2S)-Liquiritigenin	M257T363	257.185	363	18.9962	C15H12O4	C09762	4.25141e+07	3.61185e+07	80.11	6.10231e+07	6.32986e+07	31.79	0.7	-0.52	0.20468	0.69	0.478564	0.917467	pos
Saccharopine	M259T164_1	259.128	164.2	14.796	C11H20N2O6	C00449	9.08132e+06	8.86859e+06	62.2	1.34726e+07	1.26915e+07	25.19	0.67	-0.57	0.148343	0.83	0.409146	1.01273	pos
Cyclophosphamide	M261T588	261.032	588.2	2.34808	C7H15Cl2N2O2P. H2O	C06933	1.04486e+08	1.15626e+08	25.27	1.31326e+08	1.32945e+08	16.06	0.8	-0.33	0.100169	1	0.330763	1.10186	pos
Parthenin	M263T558	263.127	558.5	0.769367	C15H18O4	C09523	2.74278e+07	2.13692e+07	66.46	2.52379e+07	2.01962e+07	50.98	1.09	0.12	0.974457	0.01	0.989632	0.0082687	pos
Tetracaine	M265T274_2	265.191	273.9	0.307095	C15H24N2O2	C07526	8.84484e+07	6.99201e+07	106.01	1.73751e+08	1.76177e+08	67.87	0.51	-0.97	0.395402	0.4	0.662978	0.650429	pos
Subaphylline	M265T381	265.154	381.5	1.41804	C14H20N2O3	C10497	2.50918e+07	7.77079e+06	135.9	5.76894e+07	1.06126e+07	187.25	0.43	-1.2	0.378786	0.42	0.648978	0.566149	pos
(S)-Abscisic acid	M265T640	265.141	639.8	2.44684	C15H20O4	C06082	2.84853e+07	2.22367e+07	96.56	4.69188e+07	2.70047e+07	120.53	0.61	-0.72	0.380456	0.42	0.650485	0.633963	pos
S-Ribosyl-L-homocysteine	M267T567	267.074	566.7	15.3516	C9H17NO6S	C03539	1.53001e+07	1.0454e+07	108.94	2.33179e+07	1.40055e+07	98.31	0.66	-0.61	0.264742	0.58	0.54133	0.734483	pos
Xanthoxic acid	M267T721	267.159	721.2	0.129439	C15H22O4	C13454	6.53373e+06	3.65758e+06	129.55	1.44439e+07	1.01035e+07	90.89	0.45	-1.14	0.0811907	1.09	0.293347	1.15364	pos
Adenosine	M268T265	268.104	264.7	0.00660523	C10H13N5O4	C00212	2.03096e+08	1.64001e+08	62.85	2.92226e+08	2.64174e+08	53.7	0.69	-0.52	0.244867	0.61	0.519877	0.832247	pos
Metoprolol	M268T708	268.188	708.1	9.6052	C15H25NO3	C07202	1.88365e+07	1.96062e+07	10.58	3.29841e+07	3.29288e+07	25.69	0.57	-0.81	0.00122351	2.91	0.0214764	1.87094	pos
Medicarpin	M271T595	271.096	594.5	0.370637	C16H14O4	C10503	849560	278405	126.39	6.83178e+06	2.76243e+06	167.48	0.12	-3.01	0.0483233	1.32	0.216789	1.27523	pos
16-Oxopalmitate	M271T822	271.226	821.9	0.129255	C16H30O3	C19614	8.37079e+06	8.70535e+06	17.75	2.76756e+07	2.55412e+07	40.18	0.3	-1.73	0.000109922	3.96	0.00473606	2.02427	pos
Isoprothiolane	M273T309	273.058	309.4	1.58941	C12H18O4S2	C11111	1.40641e+08	1.3972e+08	53.45	1.68145e+08	1.7258e+08	29.34	0.84	-0.26	0.346696	0.46	0.620464	0.685344	pos
Sotalol	M273T490	273.131	490.2	1.3421	C12H20N2O3S	C07309	2.90894e+07	1.31626e+06	155.51	2.85776e+07	7.96855e+06	142.52	1.02	0.03	0.62918	0.2	0.822543	0.325145	pos
Dihydrotestosterone	M273T679	273.221	678.7	12.5686	C19H30O2	C03917	7.22085e+07	4.44083e+07	98.79	6.62262e+07	7.21066e+07	53.78	1.09	0.12	0.525285	0.28	0.754164	0.418166	pos
6-Phosphogluconic acid	M277T761	277.177	760.5	9.93484	C6H13O10P	C00345	2.84594e+07	1.16159e+07	160.62	5.72507e+06	5.97563e+06	53.6	4.97	2.31	0.0801028	1.1	0.290635	1.11593	pos
Sulfamethazine	M279T448	279.083	447.6	27.146	C12H14N4O2S	C19530	1.10013e+07	9.87363e+06	87.89	4.82751e+07	3.11352e+07	97.38	0.23	-2.13	0.0265731	1.58	0.153145	1.38515	pos
Alpha-Linolenic acid	M279T775	279.231	774.6	4.92783	C18H30O2	C06427	3.32864e+06	3.66243e+06	34.88	1.11353e+07	5.8398e+06	105.83	0.3	-1.74	0.28459	0.55	0.560356	0.694582	pos
Cyclopeptine	M280T424	280.121	424.4	2.08947	C17H16N2O2	C20579	5.74216e+07	4.30821e+07	94.05	6.27629e+07	7.05358e+07	47.56	0.91	-0.13	0.507421	0.29	0.743925	0.452906	pos
Linoleic acid	M280T807	280.263	806.8	1.32804	C18H32O2	C01595	3.02067e+07	2.88143e+07	33.57	7.0766e+07	6.19231e+07	66.97	0.43	-1.23	0.10351	0.99	0.337135	1.1421	pos
9-Riburonosyladenine	M281T350	281.099	349.6	0.00217195	C10H11N5O5	C11501	1.57471e+08	1.56086e+08	60.36	1.75944e+08	1.90781e+08	26.21	0.9	-0.16	0.416409	0.38	0.679778	0.579401	pos
1-Methyladenosine	M282T297	282.12	296.9	0.122416	C11H15N5O4	C02494	3.91349e+07	1.66152e+07	119.64	3.3249e+07	1.30665e+07	157.1	1.18	0.24	0.857989	0.07	0.941322	0.0978275	pos
Qing Hau Sau	M283T514	283.152	513.9	5.91908	C15H22O5	C09538	1.02743e+07	7.85882e+06	98.2	3.62841e+06	487414	185.63	2.83	1.5	0.0424673	1.37	0.201544	1.35885	pos
Aureusidin	M286T334	286.074	334.1	1.58855	C15H10O6	C08576	1.21409e+07	8.36974e+06	81.6	6.86447e+07	3.1514e+07	135.51	0.18	-2.5	0.0215497	1.67	0.137679	1.43052	pos
Dihydrobiochanin A	M286T366	286.072	366.5	25.5531	C16H14O5	C02675	2.19382e+07	1.70544e+07	101.66	3.22026e+07	3.34322e+07	65.87	0.68	-0.55	0.23645	0.63	0.511207	0.780261	pos
11alpha,17beta-Dihydroxyandrost-4-en-3-one	M287T601_2	287.2	600.7	14.3941	C19H28O3	C15306	1.30053e+07	6.69074e+06	118.81	1.20748e+07	1.13891e+07	70.54	1.08	0.11	0.724894	0.14	0.87577	0.251659	pos
L-Octanoylcarnitine	M288T524	288.217	524.2	1.16027	C15H29NO4	C02838	2.6749e+08	2.63893e+08	71.3	2.69155e+08	2.10829e+08	70.53	0.99	-0.01	0.893633	0.05	0.957217	0.0713517	pos
Myclobutanil	M289T358	289.125	357.5	0.652499	C15H17ClN4	C18477	1.57122e+07	1.12016e+07	99.79	1.04661e+07	7.14792e+06	107.49	1.5	0.59	0.614755	0.21	0.812667	0.413356	pos
Carbinoxamine	M291T540	291.12	540.4	20.1841	C16H19ClN2O	C06871	1.05854e+07	1.03393e+07	56.62	1.59732e+07	1.58386e+07	65.71	0.66	-0.59	0.444564	0.35	0.700434	0.526286	pos
Argininosuccinic acid	M291T84	291.13	83.8	0.081931	C10H18N4O6	C03406	5.54509e+07	3.46821e+07	126.82	2.25571e+07	2.44325e+07	45.27	2.46	1.3	0.461942	0.34	0.713738	0.607286	pos
2-hydroxyflutamide	M293T260	293.074	259.7	0.48327	C11H11F3N2O4	C14204	3.30857e+07	3.49516e+07	61	6.22699e+07	6.18166e+07	27.77	0.53	-0.91	0.121745	0.91	0.36755	1.10921	pos
Aspartame	M295T377	295.128	377.4	0.0598487	C14H18N2O5	C11045	2.42321e+08	2.39922e+08	50.99	3.51355e+08	3.2648e+08	58.15	0.69	-0.54	0.322086	0.49	0.598344	0.795576	pos
Levonorgestrel	M295T537_2	295.204	536.6	9.60013	C21H28O2	C08153	1.05495e+07	9221330	82.15	5925784	5.30135e+06	64.07	1.78	0.83	0.47246	0.33	0.721124	0.491275	pos
13-L-Hydroperoxylinoleic acid	M295T598	295.227	597.9	1.69361	C18H32O4	C04717	6.65535e+06	3.22843e+06	112.32	1.05532e+07	1.15921e+07	67.18	0.63	-0.67	0.301775	0.52	0.577142	0.678255	pos
Exemestane	M296T617	296.185	617	23.2963	C20H24O2	C08162	9.15368e+06	5.22512e+06	100.77	8.1031e+06	4.05162e+06	100.35	1.13	0.18	0.876314	0.06	0.949612	0.113825	pos
Progesterone	M297T510_2	297.221	510.4	11.2173	C21H30O2	C00410	1.72186e+07	1.16173e+07	111.65	1.91363e+07	1.40745e+07	75.86	0.9	-0.15	0.613419	0.21	0.811403	0.381813	pos
5'-Methylthioadenosine	M298T344	298.097	343.9	0.0805107	C11H15N5O3S	C00170	8.54381e+07	8.25995e+07	45.47	1.69098e+08	1.7022e+08	44.69	0.51	-0.98	0.0414455	1.38	0.199139	1.35848	pos
Metoclopramide	M299T513	299.147	513.3	21.3942	C14H22ClN3O2	C07868	1.14352e+07	2.12047e+06	181.82	1.33082e+07	3.47805e+06	152.9	0.86	-0.22	0.583364	0.23	0.793426	0.409246	pos
Enterolactone	M299T535	299.128	534.8	0.0190825	C18H18O4	C18165	5.49049e+07	1.62607e+07	160.79	1.84393e+08	4.4321e+07	197.97	0.3	-1.75	0.755102	0.12	0.892381	0.197139	pos
Nonadecanoic acid	M299T796	299.257	796.3	2.46008	C19H38O2	C16535	1.23327e+07	1.21716e+07	80.47	6.63473e+06	7.04842e+06	44.46	1.86	0.89	0.327479	0.48	0.602241	0.706292	pos
all-trans-Retinoic acid	M300T656	300.199	655.8	3.5651	C20H28O2	C00777	1.42758e+07	2.45054e+06	204.38	1.42702e+07	9.66205e+06	93.92	1	0	0.183666	0.74	0.452761	0.933187	pos
beta-D-3-Ribofuranosyluric acid	M301T292	301.078	291.8	0.0797136	C10H12N4O7	C05513	1.76612e+07	7.35699e+06	106.33	3.13068e+07	3.45507e+07	34.44	0.56	-0.83	0.0578082	1.24	0.240212	1.24076	pos
5-Nitro-2-(3-phenylpropylamino)benzoic acid	M301T412	301.118	411.8	0.498972	C16H16N2O4	C13705	2.32539e+08	2.83193e+06	222.35	9.20613e+07	1.85644e+06	187.42	2.53	1.34	0.765794	0.12	0.897817	0.234916	pos
Hesperetin	M303T528	303.086	528.4	1.24057	C16H14O6	C01709	7.65326e+06	6.54778e+06	84.16	3.711e+06	2.46157e+06	90.28	2.06	1.04	0.198787	0.7	0.47249	0.887594	pos
19(S)-HETE	M303T724	303.231	723.9	11.9843	C20H32O3	C14749	1.20559e+07	2.60552e+06	201.35	1.75613e+06	378481	179.04	6.87	2.78	0.400036	0.4	0.666425	0.631391	pos
Sinapine	M310T386	310.164	385.7	1.93216	C16H24NO5	C00933	1.82668e+07	8.04001e+06	138.78	6.65146e+07	4.15255e+07	138.51	0.27	-1.86	0.81204	0.09	0.920098	0.22865	pos
N-Acetyl-a-neuraminic acid	M310T92	310.113	91.7	0.0335651	C11H19NO9	C19909	8.93842e+07	9.35638e+07	38.5	1.23698e+08	1.32306e+08	25.94	0.72	-0.47	0.110894	0.96	0.34919	1.01566	pos
Aflatoxin B1	M312T784	312.362	784.3	0.366043	C17H12O6	C06800	5.08319e+06	4.82575e+06	17.88	3.77043e+06	3.08207e+06	54.77	1.35	0.43	0.0744023	1.13	0.277291	1.22481	pos
Decanoyl-L-carnitine	M316T611	316.248	611	0.00146583	C17H33NO4	C03299	9.79856e+06	8.53021e+06	67.48	1.24364e+07	9.33819e+06	81.01	0.79	-0.34	0.647771	0.19	0.834032	0.289685	pos
5(S)-HpETE	M319T536	319.226	536.3	2.80345	C20H32O4	C05356	8.53437e+06	9.22603e+06	39.32	6.64543e+06	4.93795e+06	52.91	1.28	0.36	0.375392	0.43	0.646419	0.646436	pos
Menthyl pyrrolidone carboxylate	M319T652	319.19	652.3	0.129376	C16H30O6	C03962	8.17763e+06	9.02894e+06	72.8	7.82877e+06	8.48649e+06	64.15	1.04	0.06	0.901181	0.05	0.960237	0.0784093	pos
12-KETE	M319T822	319.224	821.6	0.0275031	C20H30O3	C14807	1.50277e+07	1.29745e+07	47.54	7.35717e+06	6.39869e+06	37.53	2.04	1.03	0.0117597	1.93	0.0943277	1.51102	pos
Enoxacin	M321T629	321.13	629.5	16.1928	C15H17FN4O3	C06979	5.07618e+06	2.39043e+06	155.99	7.53856e+06	853163	184.53	0.67	-0.57	0.822625	0.08	0.92507	0.0953615	pos
Clostebol	M323T658	323.184	658.3	19.6983	C19H27ClO2	D07731	6.12025e+07	1.4287e+06	234.09	8.01296e+06	4.15032e+06	89.49	7.64	2.93	0.490784	0.31	0.733047	0.545867	pos
3,7-Dimethylquercetin	M330T341	330.081	341.2	2.22477	C17H14O7	C01265	8.16516e+07	5.63942e+07	72.39	1.72604e+08	1.61066e+08	60.07	0.47	-1.08	0.0725849	1.14	0.27356	1.214	pos
5'-O-beta-D-Glucosylpyridoxine	M332T166	332.133	165.8	2.74483	C14H21NO8	C03996	4.97295e+06	4.72396e+06	47.48	8.5878e+06	6.86026e+06	68.51	0.58	-0.79	0.32514	0.49	0.600503	0.749444	pos
Spectinomycin	M332T655	332.151	655	21.3758	C14H24N2O7	C02078	8.86763e+06	7.47364e+06	97.43	1.04856e+07	5.18941e+06	122.22	0.85	-0.24	0.64712	0.19	0.833848	0.260351	pos
Lipoxin B4	M335T795	335.219	795	0.311713	C20H32O5	C06315	5.56192e+06	5.00123e+06	76.55	1.23104e+06	1.27257e+06	64.63	4.52	2.18	0.0180402	1.74	0.12297	1.49717	pos
Senecionine	M336T461_2	336.191	461.3	0.0239908	C18H25NO5	C06176	2.48663e+06	1.82011e+06	73.82	2.22661e+06	2.13139e+06	75.26	1.12	0.16	0.687028	0.16	0.855705	0.241524	pos
Sucrose	M343T699	343.294	699.4	1.63741	C12H22O11	C00089	5.13222e+06	4.44479e+06	61.28	6.79535e+06	5.65471e+06	59.17	0.76	-0.4	0.4127	0.38	0.676165	0.60251	pos
Tetrahydrocortisone	M347T550	347.221	549.7	8.44996	C21H32O5	C05470	1.81543e+07	1.54101e+07	82.61	1.09211e+07	8.66723e+06	94.97	1.66	0.73	0.297551	0.53	0.572421	0.639061	pos
21-Deoxycortisol	M347T612	347.228	612.4	19.0077	C21H30O4	C05497	3.39787e+07	1.76911e+07	107.42	1.50347e+07	7.52133e+06	135.26	2.26	1.18	0.147343	0.83	0.407964	0.999131	pos
Lomefloxacin	M352T372	352.148	372.2	0.548919	C17H19F2N3O3	C07078	4.37898e+08	2.59027e+08	109.78	3.28548e+08	3.04355e+08	50.97	1.33	0.41	0.904392	0.04	0.961177	0.0808193	pos
(4Z,7Z,10Z,13Z,16Z,19Z)-Docosahexaenoic acid ethyl ester	M357T646	357.277	646.2	5.81062	C24H36O2	C16185	8.79088e+06	3.00781e+06	171.48	1.88026e+07	7.2229e+06	166.25	0.47	-1.1	0.36725	0.44	0.640399	0.586383	pos
TRIBOA-glucoside	M359T356_1	359.094	355.6	24.2276	C14H17NO10	C18062	1.98833e+07	2.11282e+07	62.91	1.24853e+07	1.32799e+07	54.7	1.59	0.67	0.614439	0.21	0.812409	0.397602	pos
Rosmarinic acid	M360T403	360.237	403	0.85488	C18H16O8	C01850	2.06335e+07	1.74841e+07	53.33	2.96274e+07	3.13288e+07	39.61	0.7	-0.52	0.182961	0.74	0.451991	0.960857	pos
Nitrendipine	M361T508	361.138	508.2	2.39085	C18H20N2O6	C07713	5.29539e+06	2.64881e+06	110.46	5.41637e+06	5.36641e+06	52.68	0.98	-0.03	0.481055	0.32	0.726793	0.467626	pos
GMP	M363T75	362.924	75.2	8.78513	C10H14N5O8P	C00144	8.71204e+07	7.36615e+07	66.77	3.59624e+07	1.99267e+07	112.08	2.42	1.28	0.0783241	1.11	0.286477	1.21437	pos
Myriocin	M384T658	384.272	658	3.85937	C21H39NO6	C19914	6.5265e+06	1.95657e+06	186.12	3.62242e+06	4.37979e+06	55.39	1.8	0.85	0.549429	0.26	0.770018	0.476181	pos
Vitamin D3	M384T828_2	384.347	827.9	21.0747	C27H44O	C05443	1.57721e+09	1.56024e+09	4.73	1.55808e+09	1.53822e+09	9.11	1.01	0.02	0.731223	0.14	0.879213	0.320281	pos
Lacto-N-biose I	M384T94	384.149	94.2	1.03037	C14H25NO11	C06372	2.46217e+07	2.73382e+07	38.47	3.3833e+07	3.40891e+07	18.24	0.73	-0.46	0.120323	0.92	0.365756	1.06566	pos
Sarsasapogenin	M399T676	399.325	675.7	7.59783	C27H44O3	C03963	3.68913e+06	3.3611e+06	102.91	1.24845e+07	1.28622e+07	79.9	0.3	-1.76	0.0988893	1	0.328286	1.11464	pos
6-Amino-6-deoxyfutalosine	M413T350	413.145	349.5	21.6001	C19H19N5O6	C20773	1.36678e+09	8.86111e+08	112.7	6.20894e+08	5.9322e+08	30.78	2.2	1.14	0.712383	0.15	0.868714	0.288136	pos
Pomiferin	M421T415	421.166	414.5	2.97721	C25H24O6	C10519	9.86096e+07	6.66044e+07	98.33	4.52025e+07	3.57952e+07	61.64	2.18	1.13	0.540159	0.27	0.764665	0.45112	pos
Ginkgolide B	M425T448	425.141	447.6	6.76481	C20H24O10	C07602	4.02638e+07	4.69212e+07	70.72	2.91664e+07	2.81912e+07	46.05	1.38	0.47	0.882743	0.05	0.952748	0.137962	pos
2,22-Dideoxy-3-dehydroecdysone	M430T668	430.295	668.3	0.0852457	C27H42O4	C16498	1.3427e+07	1.22634e+07	90.46	2.77371e+07	3.55844e+07	53.42	0.48	-1.05	0.117774	0.93	0.361106	1.08184	pos
Ononin	M431T590	431.128	590.4	12.4696	C22H22O9	C10509	1.47337e+06	25144	238.65	2.04952e+07	2.94921e+06	174.79	0.07	-3.8	0.206189	0.69	0.479836	0.90664	pos
Androsterone glucuronide	M449T683	449.252	683.2	6.3083	C25H38O8	C11135	7.22333e+06	3.6807e+06	116.46	3.47731e+06	3.0013e+06	67.06	2.08	1.05	0.798673	0.1	0.913636	0.169204	pos
Ecdysone	M464T624	464.297	623.8	7.81315	C27H44O6	C00477	2.65402e+06	2.82222e+06	61.79	1.07727e+07	4.26347e+06	144.86	0.25	-2.02	0.13914	0.86	0.396735	1.06495	pos
L-Threonylcarbamoyladenylate	M475T93	475.106	92.7	26.8032	C15H21N6O11P	C20641	1.79995e+07	1.97338e+07	86.62	3.30425e+07	2.26693e+07	80.24	0.54	-0.88	0.166651	0.78	0.43274	0.961351	pos
1-palmitoylglycerophosphocholine	M496T823	496.339	823.4	0.613845	C24H51NO7P	C04102	5.38617e+07	2.92294e+07	101.46	3.63564e+07	2.79675e+07	104.23	1.48	0.57	0.395898	0.4	0.663164	0.563179	pos
Chlorhexidine	M505T551	505.218	551.4	14.2988	C22H30Cl2N10	C06902	1.05146e+06	422965	123.81	1.97218e+07	99109.8	243.84	0.05	-4.23	0.872657	0.06	0.948479	0.184076	pos
Mesobilirubinogen	M593T532	593.329	531.8	7.03825	C33H44N4O6	C05790	8.91022e+06	4.01478e+06	158.82	1.95974e+06	1.22308e+06	122.27	4.55	2.18	0.348612	0.46	0.622211	0.626285	pos
Pyrimidine	M81T65_2	81.0705	64.7	0.336531	C4H4N2	C00396	2.21583e+07	2.25529e+07	74.47	5.03741e+07	5.19174e+07	44.35	0.44	-1.18	0.0611662	1.21	0.24762	1.24891	pos
Fomepizole	M83T820	83.0609	820.2	6.30862	C4H6N2	C07837	7.25309e+09	7.02439e+09	57.07	1.55313e+09	1.51331e+09	11.8	4.67	2.22	0.00127916	2.89	0.0221085	1.98541	pos
Ethylmethylacetic acid	M85T257	85.0653	256.9	1.79392	C5H10O2	C18319	2.03797e+07	1.73262e+07	39.05	1.36682e+08	1.03778e+08	76.65	0.15	-2.75	8.68121e-05	4.06	0.00413953	1.99081	pos
Acetoacetic acid	M85T348	85.0287	347.9	0.968949	C4H6O3	C00164	11496007	5.16571e+06	100.38	2.5806e+07	1.25202e+07	99.97	0.45	-1.17	0.228611	0.64	0.502452	0.823433	pos
2-Methylbutanal	M86T86	86.0715	86.3	1.71537	C5H10O	C02223	9.80194e+07	8.73362e+07	68.38	1.50873e+08	1.3916e+08	27.91	0.65	-0.62	0.110409	0.96	0.348685	1.11705	pos
Piperidine	M86T97	86.097	97	6.67443	C5H11N	C01746	5.50526e+07	3.29241e+07	107.1	1.33097e+08	1.35928e+08	61.23	0.41	-1.27	0.0428226	1.37	0.202752	1.32052	pos
(R)-3-Hydroxybutyric acid	M87T199	87.0446	199.2	1.21054	C4H8O3	C01089	9.82361e+07	1.10365e+08	53.66	2.51286e+08	2.48505e+08	61.34	0.39	-1.36	0.0483931	1.32	0.216789	1.26586	pos
4-Aminobutyraldehyde	M88T251	88.0761	251.1	0.340024	C4H9NO	C00555	4.60093e+07	4.53461e+07	56.53	1.10166e+07	9.73966e+06	60.03	4.18	2.06	0.00645673	2.19	0.0648036	1.61767	pos
Butyric acid	M88T745	88.0761	744.9	0.0501719	C4H8O2	C00246	3.29581e+07	2.06436e+07	110.05	1.17744e+08	1.29428e+08	39.16	0.28	-1.84	0.00691785	2.16	0.0676101	1.62083	pos
beta-Alanine	M90T119	90.0553	119	0.0238569	C3H7NO2	C00099	1.16268e+08	1.09569e+08	38.41	2.07435e+08	2.04883e+08	36	0.56	-0.84	0.0395436	1.4	0.193765	1.27675	pos
L-Alanine	M90T300	90.0553	300	3.59779	C3H7NO2	C00041	6.81346e+07	3.57205e+07	123.68	6.55699e+07	4.18216e+07	92.49	1.04	0.06	0.883755	0.05	0.953463	0.0946564	pos
Phenol	M94T33	94.0455	33.3	0.481578	C6H6O	C00146	7.61314e+07	6.92205e+07	54.19	8.99828e+07	8.15988e+07	36.34	0.85	-0.24	0.406668	0.39	0.672084	0.614217	pos
Aniline	M94T94	94.0657	94.2	6.63366	C6H7N	C00292	4.86027e+07	9.07904e+06	141.9	2.03525e+07	1.35313e+07	134.85	2.39	1.26	0.864479	0.06	0.944688	0.153843	pos
Maleimide	M98T66_2	97.9918	65.9	0.717036	C4H3NO2	C07272	3.60658e+08	2.8817e+08	73.77	4.24826e+08	2.6448e+08	102.21	0.85	-0.24	0.746252	0.13	0.887411	0.258795	pos
Hydrogen phosphate	M99T104	98.9846	104.2	0.04272	H3PO4	C00009	3.55641e+08	7.35106e+07	152.55	2.88379e+08	3.16937e+08	44.64	1.23	0.3	0.324983	0.49	0.600503	0.645683	pos
2-Hexenal	M99T1069	99.0812	1069.2	7.30714	C6H10O	C08497	4.83584e+06	3.92744e+06	65.7	1.84152e+06	1.96441e+06	24.33	2.63	1.39	0.0662029	1.18	0.258373	1.26114	pos
Maleic acid	M99T43	99.0808	43.1	0.722461	C4H4O4	C01384	9.7166e+07	9.7402e+07	72.69	2.61974e+09	1.3195e+09	82.6	0.04	-4.75	0.000101416	3.99	0.00449809	1.97021	pos
Sulfate	M99T755	98.9844	755.4	0.389741	H2SO4	C00059	4.48204e+07	2.75829e+07	85.09	4.68769e+07	4.4972e+07	44.11	0.96	-0.06	0.618787	0.21	0.814928	0.397562	pos
L-Erythrulose	M101T138	101.023	137.8	6.03821	C4H8O4	C02045	2.80321e+06	1.50963e+06	111.12	3.26903e+06	3.1736e+06	55.76	0.86	-0.22	0.340357	0.47	0.457772	0.573962	neg
2-Ketobutyric acid	M101T75	101.023	74.7	10.8886	C4H6O3	C00109	1.93942e+07	2.28121e+07	73.24	4.90201e+07	6.05662e+07	69.27	0.4	-1.34	0.193144	0.71	0.311176	0.739443	neg
gamma-Aminobutyric acid	M103T51	102.956	51.1	1.82425	C4H9NO2	C00334	102352	64693	110.05	623005	435304	99.73	0.16	-2.61	0.0137209	1.86	0.0611493	1.25994	neg
o-Cresol	M107T270	107.049	270	9.3415	C7H8O	C01542	4.45508e+06	1.96776e+06	114.08	2.49062e+07	1.01875e+07	105.85	0.18	-2.48	0.0265326	1.58	0.0875429	1.18349	neg
Hydroquinone	M109T337	109.028	336.5	9.17191	C6H6O2	C00530	1.40142e+08	1.10603e+08	62.6	1.07903e+08	7.26745e+07	62.98	1.3	0.38	0.459127	0.34	0.566202	0.430371	neg
Uracil	M111T179	111.019	179.1	0.300176	C4H4N2O2	C00106	1.50392e+08	1.53564e+08	69.31	8.44397e+07	3.65419e+07	110.84	1.78	0.83	0.2139	0.67	0.332691	0.744599	neg
2-Furoate	M111T74	111.008	73.8	10.1254	C5H4O3	C01546	9.76651e+09	9.80383e+09	22.67	1.13898e+10	7.36375e+09	107.41	0.86	-0.22	0.356296	0.45	0.473099	0.561874	neg
Oxalacetic acid	M113T371	112.985	370.7	0.640902	C4H4O5	C00036	1.52096e+12	1.53051e+12	43.89	3.05564e+11	4.73433e+09	240.59	4.98	2.32	0.00571537	2.24	0.0400863	1.51312	neg
L-Proline	M114T317	114.055	317.5	1.9372	C5H9NO2	C00148	72356.3	65105.8	84.62	446465	329796	109.46	0.16	-2.63	0.0297936	1.53	0.0934098	1.19027	neg
Dihydrouracil	M114T805	113.988	804.8	1.06566	C4H6N2O2	C00429	2.00738e+08	2.08503e+08	37.07	2.17075e+08	232775050	21.59	0.92	-0.11	0.560514	0.25	0.656877	0.322017	neg
alpha-Ketoisovaleric acid	M115T175	115.039	175.2	6.2935	C5H8O3	C00141	715795	833673	57.7	4.54831e+06	3.43652e+06	110.75	0.16	-2.67	0.010331	1.99	0.0530466	1.33225	neg
Glutarate semialdehyde	M115T813	115.039	813	11.509	C5H8O3	C03273	339013	247381	97.22	2.20344e+06	1.76212e+06	66.46	0.15	-2.7	0.0188268	1.73	0.0724809	1.34449	neg
Fumaric acid	M115T98	115.039	97.5	3.12563	C4H4O4	C00122	299918396	2.97973e+08	60.22	5.40356e+08	5.27012e+08	21.89	0.56	-0.85	0.0449792	1.35	0.120021	1.18599	neg
4-Methylaminobutyrate	M116T147	116.071	146.6	9.68367	C5H11NO2	C15987	1.85583e+06	1.95074e+06	46.59	1.79702e+07	1.09827e+07	106.81	0.1	-3.28	0.000701351	3.15	0.0181453	1.56907	neg
Succinic acid	M117T572	117.054	572	4.09956	C4H6O4	C00042	575204	446033	95.29	1.78441e+06	1.9241e+06	32.41	0.32	-1.63	0.0168942	1.77	0.068044	1.34868	neg
Betaine	M117T836	116.927	835.7	0.371183	C5H11NO2	C00719	1.7285e+10	1.67303e+10	12.81	2.24733e+10	2.49401e+10	52.54	0.77	-0.38	0.838724	0.08	0.884745	0.13531	neg
L-Threonine	M118T85	118.05	85.4	2.90381	C4H9NO3	C00188	1.6512e+08	1.94073e+08	45.58	2.6649e+08	2.6662e+08	42.61	0.62	-0.69	0.173636	0.76	0.290088	0.813354	neg
Phenylacetaldehyde	M119T184	119.049	184.3	8.60149	C8H8O	C00601	2.24237e+07	1.1869e+07	105.13	6.7685e+07	2.37357e+07	119.9	0.33	-1.59	0.263032	0.58	0.382415	0.684658	neg
3-Methylthiopropionic acid	M119T479	119.049	479.4	0.842757	C4H8O2S	C08276	5.11995e+07	3.39622e+07	104.78	7.09595e+07	4.05644e+07	95.41	0.72	-0.47	0.354373	0.45	0.47133	0.563505	neg
L-Cysteine	M120T483	120.011	483	1.75851	C3H7NO2S	C00097	2.63082e+06	1.73543e+06	116.16	2.61013e+06	1.49925e+06	124.39	1.01	0.01	0.93481	0.03	0.955635	0.0405501	neg
Erythritol	M121T183	121.028	183.4	2.02928	C4H10O4	C00503	6.29963e+06	3.27391e+06	98.19	3.41515e+07	2.62934e+07	99.09	0.18	-2.44	0.0207926	1.68	0.07634	1.24756	neg
Phenylethylamine	M121T302_1	121.028	301.6	0.260709	C8H11N	C05332	4.42516e+07	3.15276e+07	66.68	8.38181e+07	8.06854e+07	40.62	0.53	-0.92	0.0322212	1.49	0.0976996	1.17462	neg
(S)-1-Phenylethanol	M122T825	121.943	824.9	3.62898	C8H10O	C11348	806173	795155	34.67	3.35593e+06	2.58421e+06	59.55	0.24	-2.06	0.000798027	3.1	0.018906	1.54545	neg
Salicyl alcohol	M123T279	123.044	278.5	7.5095	C7H8O2	C02323	530111	476670	77.09	1.93104e+07	1.8876e+06	224.22	0.03	-5.19	0.0714052	1.15	0.160711	1.01003	neg
4-Methylcatechol	M123T422	123.044	422.4	5.88405	C7H8O2	C06730	2.20269e+07	1.74281e+07	62.64	1.45919e+08	1.38486e+08	65.36	0.15	-2.73	0.0018763	2.73	0.024914	1.49534	neg
Taurine	M124T84	124.006	83.8	7.96801	C2H7NO3S	C00245	2.35294e+08	2.26224e+08	56.29	5.96255e+08	6.02126e+08	56.1	0.39	-1.34	0.0933334	1.03	0.191643	0.924601	neg
1,2,3-Trihydroxybenzene	M125T321	125.023	320.7	7.39061	C6H6O3	C01108	2.15181e+08	1.58515e+08	86.28	1.49372e+08	1.22819e+08	95.5	1.44	0.53	0.391812	0.41	0.505192	0.548776	neg
Caprylic acid	M125T83	124.99	83.3	1.7393	C8H16O2	C06423	4.93544e+08	5.57579e+08	56.67	7.29839e+08	5.52166e+08	51.96	0.68	-0.56	0.18537	0.73	0.3026	0.770363	neg
Itaconic acid	M129T143_1	129.018	143	7.16172	C5H6O4	C00490	8.06217e+07	7.58569e+07	39.25	5.63951e+07	4.77365e+07	68.09	1.43	0.52	0.1862	0.73	0.303582	0.738068	neg
3-Methyl-2-oxovaleric acid	M129T242	129.054	242.5	10.989	C6H10O3	C03465	4.0735e+07	3.97209e+07	49.38	7.95084e+07	5.20105e+07	96.09	0.51	-0.96	0.484568	0.31	0.590704	0.39716	neg
N-Acetyl-beta-alanine	M130T532	130.05	531.8	5.56708	C5H9NO3	C01073	1.79104e+07	1.22017e+07	80.23	2.10741e+07	2.14045e+07	44.3	0.85	-0.23	0.446731	0.35	0.554916	0.45559	neg
3-Methylindole	M130T824	129.975	824.1	1.58403	C9H9N	C08313	1.06246e+07	1.04371e+07	22.22	6.5016e+07	6.03557e+07	65.46	0.16	-2.61	0.00159503	2.8	0.0234977	1.61701	neg
L-Isoleucine	M131T153	131.071	152.6	0.732028	C6H13NO2	C00407	2.10333e+06	2.03165e+06	65.29	4.69767e+06	3.18944e+06	83.98	0.45	-1.16	0.149281	0.83	0.262468	0.843782	neg
Glycyl-glycine	M132T384	132.045	384.1	17.3867	C4H8N2O3	C02037	3.39778e+07	3.55498e+07	68.53	8.22357e+07	7.52316e+07	38.01	0.41	-1.28	0.0215225	1.67	0.0775264	1.23214	neg
2-Phenylacetamide	M134T247	134.06	246.8	11.3679	C8H9NO	C02505	5.616e+06	1.82976e+06	166.83	5.04565e+06	4.09755e+06	75.34	1.11	0.15	0.554451	0.26	0.651998	0.325188	neg
Adenine	M134T302	134.047	301.6	1.84616	C5H5N5	C00147	5.29688e+06	5.47315e+06	41.05	1.44689e+07	1.45472e+07	87.69	0.37	-1.45	0.579443	0.24	0.673791	0.298035	neg
Hypoxanthine	M135T165	135.031	164.8	3.64689	C5H4N4O	C00262	4.3157e+08	6.77423e+07	166.82	9.38765e+07	8.38154e+07	62.94	4.6	2.2	0.457972	0.34	0.565186	0.465848	neg
Toluate	M135T383	135.044	382.6	5.3612	C8H8O2	C01454	1.59395e+06	1.57418e+06	71.99	1.18966e+07	9.45731e+06	44.01	0.13	-2.9	0.000305722	3.51	0.0165506	1.62991	neg
Urocanic acid	M137T278	137.035	277.7	4.55358	C6H6N2O2	C00785	5.36666e+07	5.96874e+07	55.8	1.3345e+08	1.44821e+08	22.14	0.4	-1.31	0.0117411	1.93	0.0565805	1.39484	neg
Salicylic acid	M137T443	137.023	442.8	0.000998428	C7H6O3	C00805	554114	305281	105.91	3.62172e+06	2.96142e+06	103.26	0.15	-2.71	0.0136911	1.86	0.0611493	1.25686	neg
3,4-Dihydroxybenzaldehyde	M137T751	137.023	750.8	10.9471	C7H6O3	C16700	89455.3	94875	54.36	410941	443674	56.6	0.22	-2.2	0.0260114	1.58	0.0865635	1.1909	neg
Kojic acid	M141T162	141.018	162.1	9.21868	C6H6O4	C14516	6.19046e+06	2.83595e+06	145.54	2.48817e+07	1.8154e+07	94.75	0.25	-2.01	0.0473579	1.32	0.123914	1.1176	neg
1H-Indole-3-carboxaldehyde	M144T536	144.044	535.6	6.85791	C9H7NO	C08493	2.45393e+08	1.72713e+08	105.63	7.78231e+08	8.01362e+08	52.25	0.32	-1.67	0.0750191	1.12	0.165806	1.04856	neg
4-Acetamidobutanoic acid	M144T97_2	144.066	96.5	1.05604	C6H11NO3	C02946	2.65556e+08	3.11531e+08	48.6	7.14673e+08	6.16729e+08	33.26	0.37	-1.43	0.0040106	2.4	0.0339976	1.43014	neg
Myosmine	M146T393	146.081	393.4	23.2748	C9H10N2	C10160	4.04823e+07	2.51238e+07	124.8	4.70905e+07	2.50498e+07	133.98	0.86	-0.22	0.842716	0.07	0.887393	0.152935	neg
1H-Indole-2,3-dione	M146T425	146.023	425.2	9.06704	C8H5NO2	C11129	794666	527759	78.06	1.04007e+07	7.56283e+06	112.52	0.08	-3.71	0.00289904	2.54	0.0295756	1.44182	neg
3-(3-Hydroxyphenyl)propanoic acid	M147T290	147.044	289.9	2.78827	C9H10O3	C11457	2.165e+08	1.51633e+08	90.71	2.2489e+08	1.40844e+08	100.68	0.96	-0.05	0.847685	0.07	0.890824	0.0838078	neg
L-2-Hydroxyglutaric acid	M147T398	146.965	398.1	1.43213	C5H8O5	C03196	2.24714e+07	2.04203e+07	39.35	1.69504e+08	8.42699e+07	149.94	0.13	-2.92	0.0293042	1.53	0.0923864	1.24038	neg
3-(2-Hydroxyphenyl)propanoic acid	M147T494	146.964	494.1	4.89945	C9H10O3	C01198	8.324e+10	6.72047e+10	72.02	6.08675e+10	3.17754e+10	130.07	1.37	0.45	0.242007	0.62	0.360602	0.710042	neg
trans-Cinnamate	M147T656	146.964	655.6	5.06076	C9H8O2	C00423	3.96245e+10	3.19137e+10	62.89	1.00393e+11	1.12906e+11	69.6	0.39	-1.34	0.132128	0.88	0.241087	0.853142	neg
2-Hydroxyglutarate	M148T309	148.04	308.9	16.8876	C5H8O5	C02630	6.11916e+09	6.24898e+09	48.5	1.54595e+09	5.49674e+08	171.56	3.96	1.98	0.00382817	2.42	0.0338189	1.43506	neg
Hydrocinnamic acid	M149T517	149.06	517.5	6.19881	C9H10O2	C05629	374924	330941	88.91	4.60127e+06	3.59679e+06	75.86	0.08	-3.62	0.00152691	2.82	0.0230663	1.50606	neg
Tartaric acid	M149T74	149.008	73.8	1.42839	C4H6O6	C00898	4.04192e+08	6.54757e+07	192.55	2.47103e+08	1.86095e+08	98.94	1.64	0.71	0.825542	0.08	0.873764	0.135624	neg
Guanine	M150T165	150.041	165.3	5.49179	C5H5N5O	C00242	539383	136567	179.22	679148	273699	158.33	0.79	-0.33	0.528572	0.28	0.629045	0.377742	neg
D-Lyxose	M150T273	150.055	273.2	14.6613	C5H10O5	C00476	3.01954e+09	1.8247e+09	103.45	1.20186e+09	9.7689e+08	97.5	2.51	1.33	0.103003	0.99	0.204341	0.896828	neg
Acetaminophen	M150T349	150.055	348.5	6.15774	C8H9NO2	C06804	3.602e+07	2.41988e+07	106.94	2.31569e+08	9.25779e+07	158.75	0.16	-2.68	0.0306533	1.51	0.0951125	1.16565	neg
Xanthine	M151T150	151.025	149.6	5.95927	C5H4N4O2	C00385	4.6813e+09	2.49645e+08	175.23	2.01196e+09	2.62637e+08	204.32	2.33	1.22	0.695623	0.16	0.769438	0.262235	neg
Mandelic acid	M151T483	151.039	483.2	4.79343	C8H8O3	C01984	1.19914e+06	1.24127e+06	76.94	1.07853e+07	7.63685e+06	97.86	0.11	-3.17	0.0133026	1.88	0.0603032	1.28905	neg
2-Hydroxyphenylacetate	M151T546	151.039	546.3	4.13137	C8H8O3	C05852	1.8624e+06	1.92613e+06	25.38	4.10098e+07	3.36605e+06	225.28	0.05	-4.46	0.130295	0.89	0.23871	0.931091	neg
2-(Methylamino)benzoic acid	M151T739	151.061	739.5	15.8874	C8H9NO2	C03005	2.89502e+06	2.41048e+06	90.25	3.18209e+06	2.62833e+06	75.11	0.91	-0.14	0.68897	0.16	0.763561	0.247528	neg
Methyl 2-hydroxybenzoate	M151T752	151.038	752.3	10.09	C8H8O3	C12305	5.40635e+06	5.20941e+06	54.21	2.89979e+07	1.36587e+07	144.15	0.19	-2.42	0.299053	0.52	0.41799	0.586989	neg
Vanillin	M152T148	152.046	148.1	9.86535	C8H8O3	C00755	1.75009e+08	6.58376e+07	171.98	4.11559e+07	3.25893e+07	67.47	4.25	2.09	0.335678	0.47	0.453376	0.570136	neg
N-Acetylhistamine	M152T181	152.081	180.5	12.6512	C7H11N3O	C05135	2.3652e+06	1.21946e+06	98.96	6.97227e+06	3.75724e+06	128.86	0.34	-1.56	0.169017	0.77	0.284835	0.794079	neg
L-Histidine	M155T354	155.071	353.8	7.09354	C6H9N3O2	C00135	554851	475756	32.83	4.84141e+06	3.77546e+06	100.42	0.11	-3.13	0.0031272	2.5	0.030776	1.56089	neg
4,5-Dihydroorotic acid	M157T243	157.076	242.8	3.2643	C5H6N2O4	C00337	1.3136e+08	1.32634e+08	69.47	1.43849e+08	1.66809e+08	59.16	0.91	-0.13	0.80274	0.1	0.85629	0.149331	neg
Pelargonic acid	M157T566	157.123	566.5	1.95976	C9H18O2	C01601	1.17761e+07	4.45915e+06	162.91	3.04788e+07	2.41059e+07	84.36	0.39	-1.37	0.0684279	1.16	0.156554	0.997953	neg
Allantoin	M157T91	157.036	90.5	3.91026	C4H6N4O3	C01551	1.28842e+09	8.10119e+08	101.88	6.98221e+08	6.1402e+08	69.42	1.85	0.88	0.333897	0.48	0.451619	0.572489	neg
Oxoadipic acid	M159T88	158.977	87.5	2.15912	C6H8O5	C00322	5.81226e+06	4.88921e+06	58.27	6.81391e+07	2.9095e+07	122	0.09	-3.55	0.0123862	1.91	0.0579002	1.29228	neg
Indole-3-carboxylic acid	M160T407	160.04	407.4	5.1487	C9H7NO2	C19837	1.43953e+08	2.14848e+07	213.12	1.54194e+07	1.70868e+07	68.88	9.34	3.22	0.574207	0.24	0.669107	0.325542	neg
2-Hydroxy-2-ethylsuccinic acid	M161T638	161.045	638.1	4.49562	C6H10O5	C02488	706884	650260	84.4	2.07673e+06	1.76471e+06	56.29	0.34	-1.55	0.0241695	1.62	0.0827552	1.18499	neg
Alpha-D-Glucose	M161T691	161.044	691.2	4.40872	C6H12O6	C00267	5.56547e+06	3.28702e+06	80.2	3.42614e+07	2.5895e+07	90.67	0.16	-2.62	0.0154301	1.81	0.0649813	1.25557	neg
3-Hydroxymethylglutaric acid	M161T76	161.045	75.8	0.931077	C6H10O5	C03761	3.04422e+09	2.35746e+09	86.9	2.25244e+09	1.99719e+09	93.87	1.35	0.43	0.435546	0.36	0.544793	0.472155	neg
Enol-phenylpyruvate	M164T456	164.046	456.1	8.53412	C9H8O3	C02763	504542	456281	39.16	1.17041e+06	851642	65.21	0.43	-1.21	0.0179401	1.75	0.0703565	1.23136	neg
3-Methylxanthine	M165T296	165.041	295.9	0.000859805	C6H6N4O2	C16357	9.95902e+10	3.02532e+10	179.42	4.63047e+09	9.93518e+08	191.76	21.51	4.43	0.00920823	2.04	0.0497518	1.35485	neg
Terephthalic acid	M165T321_1	165.019	320.9	2.5694	C8H6O4	C06337	713540	408062	129.07	4.39751e+06	1.5414e+06	126.34	0.16	-2.62	0.0260117	1.58	0.0865635	1.17146	neg
Phenyllactate	M165T321_2	165.055	320.9	4.38642	C9H10O3	C05607	1.45764e+10	6.67292e+09	103.51	2.10812e+10	9.48645e+09	116.27	0.69	-0.53	0.825722	0.08	0.873877	0.121539	neg
Phosphohydroxypyruvic acid	M165T79_1	164.956	78.7	17.6408	C3H5O7P	C03232	1.94568e+10	1.788e+10	25.46	7.23389e+09	1.54538e+09	133.84	2.69	1.43	0.0325036	1.49	0.0982602	1.25238	neg
6-Methylmercaptopurine	M166T390	166.032	390	6.62521	C6H6N4S	C16614	2.89878e+06	2716476	92.1	6.05358e+06	4.23672e+06	81.6	0.48	-1.06	0.169733	0.77	0.285719	0.784956	neg
L-4-Hydroxyphenylglycine	M166T421	166.05	420.7	3.15567	C8H9NO3	C12323	2.37349e+06	603324	142.09	2.51203e+06	616285	142.1	0.94	-0.08	0.937973	0.03	0.95756	0.059476	neg
Pyridoxal	M166T699	166.05	698.8	2.55344	C8H9NO3	C00250	2.35522e+07	2.6464e+07	36.57	1.08444e+07	7.87605e+06	70.07	2.17	1.12	0.033288	1.48	0.0995729	1.1281	neg
3,4-Dihydroxybenzeneacetic acid	M167T169	167.035	169.1	1.05367	C8H8O4	C01161	317195	316003	76.06	1.59765e+06	1.31625e+06	77	0.2	-2.33	0.00859016	2.07	0.0480129	1.3311	neg
Homogentisic acid	M167T294	167.036	293.6	3.44837	C8H8O4	C00544	8.06591e+06	7339252	88.84	3.97896e+07	1.3791e+07	143.81	0.2	-2.3	0.232509	0.63	0.351966	0.72221	neg
Vanillic acid	M167T339	167.034	339.4	5.28477	C8H8O4	C06672	1.26917e+08	1.23258e+08	31.54	1.9968e+08	1.68885e+08	56.85	0.64	-0.65	0.39013	0.41	0.503892	0.526178	neg
Uric acid	M167T93	167.02	92.7	2.54134	C5H4N4O3	C00366	1.34171e+13	1.38165e+13	34.88	6.93417e+12	1.40225e+11	153.44	1.93	0.95	0.0437403	1.36	0.11807	1.19273	neg
1-Methylhistidine	M168T94	168.077	93.6	4.90251	C7H11N3O2	C01152	2.71928e+08	2.04057e+08	59.19	9.83269e+08	6.61048e+08	97.03	0.28	-1.85	0.0261587	1.58	0.0868596	1.20785	neg
Gallic acid	M169T283	169.013	283.5	4.14168	C7H6O5	C01424	5.26485e+07	5.71818e+07	58.09	9.85387e+07	50390838	139.1	0.53	-0.9	0.762855	0.12	0.824093	0.180634	neg
Diethylthiophosphate	M169T300	169.009	299.6	4.73349	C4H11O3PS	C06607	254322	142953	129.16	3.58892e+06	342038	216.7	0.07	-3.82	0.102674	0.99	0.203954	0.909025	neg
Hydantoin-5-propionic acid	M171T92	171.04	91.7	8.7699	C6H8N2O4	C05565	8.21828e+09	6.82312e+09	71.04	6.12298e+09	3.40199e+09	117.42	1.34	0.42	0.24942	0.6	0.36803	0.656666	neg
N-Acetylleucine	M172T314	172.097	314.1	3.18434	C8H15NO3	C02710	1.61134e+09	1.45045e+09	43.64	1.68321e+09	1.68021e+09	71.59	0.96	-0.06	0.592218	0.23	0.68386	0.317942	neg
Shikimic acid	M173T169	173.045	168.6	3.606	C7H10O5	C00493	136548	70120.9	90.47	2.48481e+06	511304	198.99	0.05	-4.19	0.0150592	1.82	0.064099	1.28798	neg
Suberic acid	M173T95	173.081	95.3	2.02499	C8H14O4	C08278	2.9215e+09	2.88446e+09	51.01	2.59442e+09	3.29148e+08	186.42	1.13	0.17	0.115841	0.94	0.22128	0.927701	neg
Citrulline	M174T85	174.088	85.4	1.11743	C6H13N3O3	C00327	7.80454e+06	8.3287e+06	53.39	2.55271e+07	2.9268e+07	68.37	0.31	-1.71	0.116016	0.94	0.221544	0.913585	neg
Guanidinosuccinic acid	M175T183	175.06	183.4	6.85477	C5H9N3O4	C03139	1.09477e+07	1.0219e+07	55.59	8.42131e+07	1.79795e+07	193.98	0.13	-2.94	0.307967	0.51	0.426024	0.62039	neg
D-Glucurono-6,3-lactone	M175T384	175.024	384.1	2.574	C6H8O6	C02670	2.44525e+06	2.00088e+06	95.34	1.79318e+07	1.13879e+07	124.53	0.14	-2.87	0.0103179	1.99	0.0530198	1.31672	neg
Ascorbate	M175T74	175.024	74.2	2.00265	C6H8O6	C00072	4.8358e+07	3.96496e+07	64.07	9.15069e+07	7.01928e+07	61.48	0.53	-0.92	0.0592979	1.23	0.141929	1.02637	neg
2-Isopropylmalic acid	M176T97_2	176.064	97.1	26.6949	C7H12O5	C02504	1.71291e+08	2.44551e+07	164.72	2.96384e+07	5.02168e+06	201.98	5.78	2.53	0.201646	0.7	0.32001	0.724149	neg
Aesculetin	M177T372	177.019	372.2	3.52505	C9H6O4	C09263	3.35335e+06	3.79321e+06	61.42	9.76354e+06	6.91056e+06	77.29	0.34	-1.54	0.0611096	1.21	0.144749	1.03875	neg
5-Hydroxyconiferyl alcohol	M177T624	177.056	624.3	5.02668	C10H12O4	C12205	2.05049e+06	430152	184.82	3.85136e+06	3.14673e+06	83.16	0.53	-0.91	0.107487	0.97	0.210217	0.929341	neg
D-Gulono-1,4-lactone	M178T114	178.025	113.9	3.03495	C6H10O6	C05410	2.4173e+08	1.94107e+08	73.55	2.02093e+08	8.65437e+07	133.88	1.2	0.26	0.379386	0.42	0.493951	0.537096	neg
Hippuric acid	M178T309_1	177.988	308.8	4.72308	C9H9NO3	C01586	692542	729414	70.32	6.88837e+08	2.47661e+06	242	0	-9.96	0.0642421	1.19	0.149878	1.11044	neg
2-Hydroxy-3-(4-hydroxyphenyl)propenoic acid	M179T273	179.034	273	6.2781	C9H8O4	C05350	1.57441e+08	1.5305e+08	81.89	1.43673e+08	1.26724e+08	30.81	1.1	0.13	0.53283	0.27	0.632918	0.368244	neg
Coniferyl alcohol	M179T453	179.071	453.3	2.92621	C10H12O3	C00590	2.58492e+06	2.07803e+06	54.99	1.51943e+07	3.3913e+06	182.77	0.17	-2.56	0.120042	0.92	0.226324	0.894298	neg
Caffeate	M179T572	179.036	571.6	4.33435	C9H8O4	C01197	517391	321726	115.84	4.06977e+06	2.3317e+06	107.7	0.13	-2.98	0.00446277	2.35	0.0357637	1.40235	neg
D-Mannose	M180T107	180.066	106.9	14.4392	C6H12O6	C00159	9.52474e+07	4.85552e+07	136	5.20319e+07	3.51275e+07	96.34	1.83	0.87	0.674388	0.17	0.751922	0.28027	neg
Beta-D-Glucose	M180T123	180.066	122.9	14.4394	C6H12O6	C00221	5.16358e+08	3.19842e+08	103.56	5.10464e+08	4.82101e+08	77.23	1.01	0.02	0.956047	0.02	0.969432	0.0183731	neg
L-Tyrosine	M180T159	180.066	158.7	0.576026	C9H11NO3	C00082	4.47969e+08	2.87769e+08	114.58	6.02403e+08	4.6867e+08	69.96	0.74	-0.43	0.282482	0.55	0.40167	0.664899	neg
L-threo-3-Phenylserine	M180T330	180.066	329.5	4.02075	C9H11NO3	C03290	2.82692e+09	9.11322e+08	145.31	9.55349e+08	2.51171e+08	178.85	2.96	1.57	0.156593	0.81	0.270872	0.788417	neg
Sorbitol	M181T159	181.07	159	9.23494	C6H14O6	C00794	6.16665e+08	3.89875e+08	94.94	1.57881e+08	128962960	77.65	3.91	1.97	0.0136308	1.87	0.0610533	1.26741	neg
(R)-3-(4-Hydroxyphenyl)lactate	M181T278	181.052	277.9	9.80941	C9H10O4	C03964	4.50962e+08	5.0241e+08	52.43	3.98537e+08	3.40446e+08	37.83	1.13	0.18	0.952585	0.02	0.967447	0.0524796	neg
Acetylcholine chloride	M181T720	180.971	719.5	3.96205	C7H16NO2. Cl	C08201	3.27388e+06	1.66752e+06	115.64	1.30574e+07	9.30886e+06	96.57	0.25	-2	0.021377	1.67	0.0773277	1.22054	neg
Mannitol	M181T86	181.071	86.4	0.388449	C6H14O6	C00392	8.77486e+08	9.04306e+08	40.09	1.62872e+09	1.03313e+09	87.71	0.54	-0.89	0.332154	0.48	0.450125	0.580163	neg
Saccharin	M182T316	181.991	316.2	5.07718	C7H5NO3S	C12283	1.52222e+07	8.42403e+06	102.46	9.75377e+07	5.5438e+07	114.54	0.16	-2.68	0.0379882	1.42	0.107842	1.14378	neg
Epinephrine	M182T356	182.082	355.7	3.42703	C9H13NO3	C00788	1.26521e+08	9.86159e+07	84	6.90966e+08	2.01902e+08	159.93	0.18	-2.45	0.301424	0.52	0.419835	0.629745	neg
2,4-Dinitrophenol	M183T426	183.004	426.1	2.86332	C6H4N2O5	C02496	6.5751e+06	6.54736e+06	29.73	1.82204e+07	1.24109e+07	70.05	0.36	-1.47	0.00631992	2.2	0.0419535	1.35947	neg
Ecgonine	M184T363	184.097	363.3	6.6125	C9H15NO3	C10858	1.32867e+08	3.34108e+07	132.43	1.01609e+09	1.45197e+08	201.67	0.13	-2.93	0.326779	0.49	0.445259	0.603126	neg
(2R)-2-Hydroxy-3-(phosphonatooxy)propanoate	M185T73	184.985	72.6	2.83266	C3H7O7P	C00197	1.91684e+07	1.92654e+07	39.5	3.24747e+07	3.36005e+07	57.62	0.59	-0.76	0.229662	0.64	0.348626	0.711358	neg
Azelaic acid	M187T305	187.097	305.3	1.87484	C9H16O4	C08261	8.76728e+07	6.85385e+07	94.92	2.2576e+08	8.62762e+07	163.89	0.39	-1.36	0.781951	0.11	0.840401	0.147208	neg
Kynurenic acid	M188T321	188.035	320.7	0.938999	C10H7NO3	C01717	1.25534e+10	1.31369e+10	69.94	8.17689e+09	5.93585e+09	113.34	1.54	0.62	0.210875	0.68	0.32929	0.704738	neg
4-(2-Aminophenyl)-2,4-dioxobutanoic acid	M188T479	188.035	478.8	0.0531816	C10H9NO4	C01252	2.16155e+06	1.66927e+06	77.96	5.5834e+06	4.96126e+06	58.67	0.39	-1.37	0.0423942	1.37	0.115538	1.11692	neg
Citric acid	M191T171	190.965	170.9	6.63991	C6H8O7	C00158	302099	212703	85.24	2.31867e+06	950087	137.05	0.13	-2.94	0.0381698	1.42	0.108229	1.12275	neg
Scopoletin	M191T573	191.035	573	2.09386	C10H8O4	C01752	339329	344583	75.93	3.91287e+06	2.19777e+06	104.28	0.09	-3.53	0.00115288	2.94	0.0208107	1.53127	neg
5-Hydroxyindoleacetic acid	M191T727	191.107	727.4	3.15786	C10H9NO3	C05635	726852	522135	75.18	1.36823e+06	1.32398e+06	60.24	0.53	-0.91	0.207307	0.68	0.325543	0.73921	neg
Phenylacetylglycine	M192T551	192.067	550.9	0.124957	C10H11NO3	C05598	3.48247e+06	979106	195.02	6.31032e+06	4.40922e+06	91.15	0.55	-0.86	0.0727254	1.14	0.162597	1.00509	neg
trans-Ferulic acid	M193T265	193.051	265.3	2.98366	C10H10O4	C01494	6.27509e+06	5.10581e+06	94.03	1.47407e+07	9.11494e+06	86.72	0.43	-1.23	0.142109	0.85	0.253883	0.833735	neg
D-Glucuronic acid	M193T436	193.035	435.8	2.59021	C6H10O7	C00191	2.12955e+08	1.20251e+08	88.33	2.76065e+07	1.57817e+07	109.84	7.71	2.95	0.00202741	2.69	0.0257976	1.48946	neg
beta-D-Glucopyranuronic acid	M193T519_1	193.035	519.1	2.19649	C6H10O7	C08350	377387	285750	98.98	6.21285e+06	6.49882e+06	90.41	0.06	-4.04	0.012003	1.92	0.0571611	1.2749	neg
Zingerone	M193T743	193.088	743	4.0189	C11H14O3	C17497	1.21813e+07	9.10486e+06	98.32	3.99625e+06	2.98359e+06	78.4	3.05	1.61	0.148701	0.83	0.261872	0.812382	neg
Salicyluric acid	M194T349	194.045	348.5	2.57672	C9H9NO4	C07588	1.95858e+08	1.30261e+08	108.78	1.16227e+09	4.5758e+08	160.09	0.17	-2.57	0.0387524	1.41	0.109132	1.12677	neg
Methyl beta-D-galactoside	M194T769	194.082	768.8	2.02651	C7H14O6	C03619	1.34949e+06	1.31124e+06	42.02	4.72047e+06	4.00118e+06	54.78	0.29	-1.81	0.00136205	2.87	0.0218843	1.51024	neg
3,7-Dimethyluric acid	M195T290	195.052	289.7	0.635727	C7H8N4O3	C16360	1.00829e+11	1.03445e+10	222.06	1.72205e+09	9.40954e+08	117.73	58.55	5.87	0.0594252	1.23	0.142063	1.05431	neg
Gluconic acid	M195T79	195.05	79.3	1.13753	C6H12O7	C00257	2.37229e+11	2.60912e+11	57.11	3.92788e+09	3.73949e+09	45.74	60.4	5.92	0.000515187	3.29	0.0175667	1.69069	neg
L-Dopa	M197T288	197.067	288.2	8.11906	C9H11NO4	C00355	1.09531e+10	4.36993e+09	168.54	2.96848e+08	1.51828e+08	122.67	36.9	5.21	0.00314892	2.5	0.0308838	1.43477	neg
N-Acetylhistidine	M197T289	197.082	288.9	8.11846	C8H11N3O3	C02997	1.20015e+10	2.08308e+09	176.67	4.39032e+08	1.39206e+08	136.83	27.34	4.77	0.0375745	1.43	0.107099	1.12938	neg
Syringic acid	M198T653	197.962	653.4	3.35105	C9H10O5	C10833	42475.5	26990.5	90.48	775573	395966	147.73	0.05	-4.19	0.00203116	2.69	0.0257976	1.46982	neg
N-Acetylserotonin	M199T837	199.17	837	3.66387	C12H14N2O2	C00978	8.02059e+07	7.10987e+07	29.39	9.28982e+07	9.60296e+07	32.16	0.86	-0.21	0.541065	0.27	0.639969	0.365684	neg
Asymmetric dimethylarginine	M201T130	201.135	130.1	5.96524	C8H18N4O2	C03626	4.81331e+08	4.54608e+08	64.14	8.42974e+08	8.63112e+08	81.23	0.57	-0.81	0.506659	0.3	0.609201	0.437317	neg
D-Erythritol 4-phosphate	M201T500	201.022	500.2	26.2465	C4H11O7P	C03494	3.44013e+07	1.36535e+07	155.75	4.77686e+08	1.62619e+08	177.52	0.07	-3.8	0.112157	0.95	0.216534	0.930305	neg
Indolepyruvate	M202T829	201.906	828.7	1.41183	C11H9NO3	C00331	1.67708e+06	1.71408e+06	22.72	6.79116e+06	3.25931e+06	114.02	0.25	-2.02	0.0369584	1.43	0.105872	1.20391	neg
L-Tryptophan	M203T332	203.082	332.4	0.0896565	C11H12N2O2	C00078	2.45423e+10	1.75743e+10	87.19	1.2002e+10	1.40026e+09	165.55	2.04	1.03	0.0466899	1.33	0.122794	1.07561	neg
Tryptophan	M204T332	204.085	332.4	23.41	C11H12N2O2	C00806	3.22658e+08	1.98987e+08	86.55	1.02325e+08	7.72487e+07	85.92	3.15	1.66	0.0234107	1.63	0.081343	1.19074	neg
5-Methoxyindoleacetate	M204T409	204.066	409.3	1.06442	C11H11NO3	C05660	2.92381e+08	7.79268e+07	130.8	9.0961e+08	5.25921e+08	118.41	0.32	-1.64	0.127939	0.89	0.235779	0.879198	neg
1,3,7-Trimethyluric acid	M209T329	209.068	329.4	1.07142	C8H10N4O3	C16361	1.38866e+09	2.39703e+08	141.69	8.47157e+08	2.69698e+08	171.27	1.64	0.71	0.978775	0.01	0.98486	0.0270429	neg
5-Carboxyvanillic acid	M211T760	211.025	760.1	1.3079	C9H8O6	C18338	883846	631598	89.24	1.424e+06	904536	114.12	0.62	-0.69	0.645458	0.19	0.727712	0.26604	neg
Dethiobiotin	M213T234	213.124	233.7	2.03023	C10H18N2O3	C01909	2.46812e+07	1.7013e+07	77.53	4.20623e+07	4.2151e+07	69.8	0.59	-0.77	0.316184	0.5	0.434382	0.59523	neg
N-Acetyl-D-glucosamine	M221T819	221.154	818.9	0.9148	C8H15NO6	C00140	1.08079e+08	1.08329e+08	16.07	1.08231e+08	9.93823e+07	43.04	1	0	0.755208	0.12	0.818119	0.194708	neg
6-Acetyl-D-glucose	M222T268	222.077	267.9	12.1581	C8H14O7	C02655	1.00229e+09	6.96096e+08	92.03	2.06658e+08	2.06235e+08	57.91	4.85	2.28	0.0229659	1.64	0.0805253	1.18176	neg
Thymidine	M223T539	223.028	539.4	0.482528	C10H14N2O5	C00214	187595	187319	90.77	1.85055e+06	974721	92.39	0.1	-3.3	0.0265038	1.58	0.0875166	1.26691	neg
Porphobilinogen	M225T298_2	225.088	298.2	1.33281	C10H14N2O4	C00931	302412	107962	166.69	1.01646e+06	296600	150.71	0.3	-1.75	0.112057	0.95	0.216468	0.909726	neg
N-Succinyl-L-glutamate	M228T94	228.049	94.1	9.25232	C9H13NO7	C05931	9.39632e+06	1.00461e+07	50.38	2.10972e+07	1.96684e+07	44.74	0.45	-1.17	0.0164511	1.78	0.0672243	1.24474	neg
D-Ribulose 5-phosphate	M230T345	230.012	345.1	29.9975	C5H11O8P	C00199	1.75892e+06	1.12877e+06	118.3	1.01781e+07	669925	179.9	0.17	-2.53	0.292908	0.53	0.411949	0.623835	neg
L-Xylulose 5-phosphate	M230T356	230.013	355.9	28.2585	C5H11O8P	C03291	9.96581e+07	9.64298e+07	67.82	3.76615e+07	9.26296e+06	157.03	2.65	1.4	0.132964	0.88	0.24206	0.836845	neg
L-Cystine	M239T468_2	239.129	467.6	5.50367	C6H12N2O4S2	C00491	3987726	3.32589e+06	77.99	5.40875e+06	5.23618e+06	35.98	0.74	-0.44	0.210056	0.68	0.328384	0.75239	neg
Glucosamine 6-phosphate	M240T457	240.033	456.7	24.1217	C6H14NO8P	C00352	184384	134021	100.95	257026	183447	103.66	0.72	-0.48	0.688372	0.16	0.76318	0.275214	neg
1-Hexadecanol	M241T570	241.039	570	1.50372	C16H34O	C00823	432039	528905	68.62	2.68877e+06	560910	198.35	0.16	-2.64	0.170976	0.77	0.287205	0.813435	neg
Pseudouridine	M243T97_2	243.062	97.1	0.0987402	C9H12N2O6	C02067	3.14608e+10	3.65737e+09	209.32	2.20302e+09	2.16557e+09	17.15	14.28	3.84	0.219682	0.66	0.338539	0.730235	neg
Pyridoxal phosphate	M247T827	247.171	827.3	1.66121	C8H10NO6P	C00018	2.07627e+06	2.1926e+06	40.09	1.14964e+07	7.30855e+06	81.88	0.18	-2.47	0.00123575	2.91	0.0211293	1.53331	neg
gamma-Glutamylcysteine	M249T84	248.96	83.8	0.436531	C8H14N2O5S	C00669	9.76853e+07	7.9754e+07	46.26	9.66485e+07	7.62796e+07	85.59	1.01	0.02	0.488489	0.31	0.593671	0.413744	neg
Deoxyadenosine	M251T454	251.129	453.9	0.14022	C10H13N5O3	C00559	102760	84057	95.24	1.86352e+06	976830	119.57	0.06	-4.18	0.00259252	2.59	0.0283461	1.45516	neg
Deoxyinosine	M251T479	251.073	478.5	23.8975	C10H12N4O4	C05512	528103	427934	86.9	5.90999e+06	3.75694e+06	97.51	0.09	-3.48	0.00648167	2.19	0.0424445	1.3717	neg
5,7-Dihydroxyflavone	M253T567	253.05	567	0.396046	C15H10O4	C10028	2.33089e+06	1.33171e+06	109.26	7.6145e+07	3.29871e+07	117.87	0.03	-5.03	0.00451455	2.35	0.035856	1.42939	neg
Palmitic acid	M255T788	255.231	787.8	7.58333	C16H32O2	C00249	4.83672e+07	6.19319e+07	51.21	5.10884e+07	4.55689e+07	67.67	0.95	-0.08	0.987292	0.01	0.990766	0.00469429	neg
Levorphanol	M257T482	257.176	482.3	8.16562	C17H23NO	C08014	102922	45853.9	114.93	1.25322e+06	387705	169.31	0.08	-3.61	0.0117799	1.93	0.0567057	1.31317	neg
Glucose 6-phosphate	M260T97	260.025	97.1	19.2286	C6H13O9P	C00092	5.33551e+10	5.95801e+10	47.49	6.69004e+10	6.38348e+10	67.75	0.8	-0.33	0.987699	0.01	0.991001	0.0155705	neg
Mannitol 1-phosphate	M261T410	261.043	410.3	20.5947	C6H15O9P	C00644	2.71203e+06	2.36568e+06	49.87	1.44803e+07	7.76019e+06	109.53	0.19	-2.42	0.0538686	1.27	0.13383	1.09304	neg
Stearic acid	M265T736	265.148	735.5	0.942941	C18H36O2	C01530	3.42689e+07	2.94093e+07	84.21	1.13857e+08	7.38752e+07	98.96	0.3	-1.73	0.0738231	1.13	0.164071	0.990156	neg
Practolol	M265T835	265.148	835.1	29.8852	C14H22N2O3	C11696	5.76426e+06	5.694e+06	15.48	7.00594e+06	5.28786e+06	56.99	0.82	-0.28	0.596447	0.22	0.687418	0.334042	neg
Deoxyguanosine	M266T369	265.979	369.2	4.72128	C10H13N5O4	C00330	1.77384e+07	1.26684e+07	92.5	2.01163e+07	2.11001e+07	48.11	0.88	-0.18	0.36505	0.44	0.480885	0.525677	neg
Inosine	M267T267	267.074	266.6	0.284566	C10H12N4O5	C00294	646484	289107	132.45	3.6611e+06	3.17519e+06	83.73	0.18	-2.5	0.00504952	2.3	0.0377223	1.39034	neg
Formononetin	M267T570	267.067	570.4	2.56477	C16H12O4	C00858	18555	14882.7	76.58	464360	182091	110.39	0.04	-4.65	0.000880217	3.06	0.019738	1.56378	neg
Retinol	M267T838	267.158	838.3	1.19266	C20H30O	C00473	5.65055e+06	5.53381e+06	73.08	1.42096e+07	1.01468e+07	104.91	0.4	-1.33	0.22772	0.64	0.346644	0.674843	neg
Diethylstilbestrol	M268T736	268.147	735.6	3.72929	C18H20O2	C07620	121714	106294	79.35	464932	304710	97.56	0.26	-1.93	0.0691086	1.16	0.157388	1.00674	neg
Apigenin	M269T633	269.046	633.2	0.408888	C15H10O5	C01477	2.36358e+06	1.56979e+06	113.49	5.09363e+08	9.15588e+06	240.04	0	-7.75	0.0292331	1.53	0.0922594	1.18975	neg
Genistein	M269T771	269.046	771.5	1.02585	C15H10O5	C06563	82089.4	41644.1	90.29	1.56583e+06	1.82234e+06	74.07	0.05	-4.25	0.00245937	2.61	0.0278247	1.46427	neg
Dehydroepiandrosterone	M269T807	269.213	806.7	3.07121	C19H28O2	C01227	1.22871e+07	1.10965e+07	26.79	2.74526e+07	2.37219e+07	28.3	0.45	-1.16	0.000300908	3.52	0.0165506	1.60835	neg
Naringenin	M272T371	272.061	370.5	28.5727	C15H12O5	C00509	146722	16031.1	152.39	1.53694e+06	570782	141.39	0.1	-3.39	0.0162523	1.79	0.0668523	1.26371	neg
D-Glucuronic acid 1-phosphate	M273T458	273.007	457.5	21.1574	C6H11O10P	C05385	1.04129e+06	901362	87.26	2.82188e+07	2.72021e+06	219.15	0.04	-4.76	0.0955214	1.02	0.194701	0.966425	neg
[8]-Shogaol	M275T747	275.169	747.3	13.8097	C17H24O3	C10494	4.35779e+07	2.46129e+07	115.96	2.57017e+07	8.57189e+06	175.74	1.7	0.76	0.747674	0.13	0.811867	0.203391	neg
Dibutyl phthalate	M277T670	277.145	669.6	0.962731	C16H22O4	C14214	84036.3	92192.6	29	533733	341369	87.31	0.16	-2.67	0.00139508	2.86	0.0221603	1.50463	neg
(R)-10-Hydroxystearate	M281T32	281.248	32.4	0.0355558	C18H36O3	C03195	2.87927e+06	3.02632e+06	56.34	1.51008e+07	1.1264e+07	55.41	0.19	-2.39	0.000501387	3.3	0.0175013	1.58616	neg
Oleic acid	M282T837	282.252	836.6	12.046	C18H34O2	C00712	2.107e+08	207035394	38.71	1.60752e+08	1.77384e+08	50.41	1.31	0.39	0.31059	0.51	0.428594	0.586854	neg
Glycitein	M283T161	283.069	160.8	27.1171	C16H12O5	C14536	4.42783e+06	416163	145.4	1.07054e+07	3.7834e+06	145.79	0.41	-1.27	0.114043	0.94	0.218964	0.874219	neg
2-Methoxyestradiol	M283T482	283.166	481.6	11.6892	C19H26O3	C05302	2.88416e+08	4.177e+07	158.01	7.41796e+07	5.04633e+07	76.09	3.89	1.96	0.883568	0.05	0.91854	0.0805348	neg
Rhein	M283T510	283.024	509.8	2.5156	C15H8O6	C10401	1.53137e+06	994155	101.92	4.99094e+06	3.89381e+06	87.71	0.31	-1.7	0.309998	0.51	0.428092	0.602522	neg
Quercetin	M283T579	283.062	578.5	2.82889	C15H10O7	C00389	95291.1	60975.7	108.33	1.76471e+06	899264	96.7	0.05	-4.21	0.00133157	2.88	0.0217293	1.52192	neg
Xanthosine	M283T96_3	283.069	95.9	1.68157	C10H12N4O6	C01762	2.32507e+07	6.25719e+06	130.22	1.66301e+07	7.54232e+06	131.61	1.4	0.48	0.811172	0.09	0.862748	0.11408	neg
Luteolin	M285T594_1	285.049	594.2	28.6828	C15H10O6	C01514	1.24033e+07	8.12956e+06	115.94	3.86677e+07	1.23395e+07	193.06	0.32	-1.64	0.561814	0.25	0.657999	0.394604	neg
Epiandrosterone	M289T38	288.951	37.9	6.63779	C19H30O2	C07635	1.42117e+06	1.39998e+06	57.31	7.45156e+06	6.38152e+06	69.48	0.19	-2.39	0.0106276	1.97	0.053981	1.30838	neg
Gingerol	M293T694	293.176	693.8	0.764047	C17H26O4	C10462	424129	369660	63.27	5.08861e+06	2.49624e+06	141.26	0.08	-3.58	0.0015374	2.81	0.0230962	1.49977	neg
9-OxoODE	M293T819	293.212	818.5	0.600247	C18H30O3	C14766	7.72049e+06	8.07796e+06	26.38	3.87021e+07	1.66194e+07	143.9	0.2	-2.33	0.0916438	1.04	0.189473	1.02016	neg
12,13-DHOME	M295T801	295.228	800.7	2.6759	C18H34O4	C14829	2.41867e+07	2.38603e+07	18.9	7.21206e+08	2.56734e+07	238.05	0.03	-4.9	0.500181	0.3	0.603397	0.42822	neg
Isorhamnetin	M297T693	297.047	692.6	24.2049	C16H12O7	C10084	960153	7311.8	164.9	968662	855621	70.62	0.99	-0.01	0.0844443	1.07	0.179611	1.02894	neg
6beta-Hydroxytestosterone	M303T787	303.2	787.3	10.8839	C19H28O3	C14497	176579	85848.6	104.57	702095	618868	75.9	0.25	-1.99	0.0292824	1.53	0.092366	1.14874	neg
Zaleplon	M304T433	304.122	433.4	6.49738	C17H15N5O	C07484	486165	523819	82.67	1.31238e+07	1.5834e+06	195.93	0.04	-4.75	0.12052	0.92	0.226889	0.884696	neg
dCMP	M307T725	307.117	725.2	2.08927	C9H14N3O7P	C00239	4.88445e+06	4.09963e+06	110.58	2.90183e+06	2.92365e+06	22.3	1.68	0.75	0.799888	0.1	0.853932	0.117107	neg
Ribose 1,5-bisphosphate	M309T761	309.174	760.7	0.431151	C5H12O11P2	C01151	1.24901e+08	1.00274e+08	49.52	9.63836e+07	7.92045e+07	53.66	1.3	0.37	0.347178	0.46	0.464339	0.560548	neg
Arachidic acid	M311T746	311.169	745.8	0.976975	C20H40O2	C06425	1.95906e+06	1.23534e+06	102.96	3.26528e+06	1.42187e+06	159.96	0.6	-0.74	0.900342	0.05	0.930968	0.0653187	neg
9(S)-HPODE	M311T768	311.224	767.5	3.77863	C18H32O4	C14827	2.01333e+06	1.77467e+06	61.31	3.20342e+06	1.72282e+06	123.96	0.63	-0.67	0.723748	0.14	0.792135	0.192612	neg
9,10-DHOME	M313T739	313.239	738.9	2.79658	C18H34O4	C14828	54036.4	54419.1	43.35	667075	447922	95.9	0.08	-3.63	0.000297758	3.53	0.0165506	1.60186	neg
Norfloxacin	M319T426	319.13	426.1	10.3406	C16H18FN3O3	C06687	1.99731e+06	1.75416e+06	76.09	6.65143e+06	5.31018e+06	64.2	0.3	-1.74	0.0106124	1.97	0.0539492	1.31536	neg
UMP	M323T177	323.019	177.2	29.7196	C9H13N2O9P	C00105	43835.8	36076.8	92.9	507422	206993	164.05	0.09	-3.53	0.0133628	1.87	0.0603946	1.29492	neg
Cyclic AMP	M328T289	328.045	289.5	0.98767	C10H12N5O6P	C00575	4.56053e+07	5.32236e+07	63.45	8.70263e+07	8.42506e+07	43.37	0.52	-0.93	0.0832854	1.08	0.177865	0.993911	neg
Furosemide	M329T491	329.001	490.9	1.14285	C12H11ClN2O5S	C07017	1.18199e+08	101689	225.43	4.10636e+08	8.94321e+07	184.54	0.29	-1.8	0.394195	0.4	0.507173	0.48709	neg
Nicotinamide ribotide	M334T762	333.934	761.7	11.7367	C11H15N2O8P	C00455	305720	277235	57.33	2.79949e+06	2.50281e+06	91.47	0.11	-3.19	0.00435337	2.36	0.0354455	1.41147	neg
Erucic acid	M338T797	338.209	797.1	0.0690101	C22H42O2	C08316	576980	412785	71.96	1.26732e+06	1.20333e+06	43.18	0.46	-1.14	0.0128651	1.89	0.0591234	1.28578	neg
Esculin	M339T327	339.065	327	20.7158	C15H16O9	C09264	1.14283e+07	1.34052e+07	59.74	3.49143e+07	3.33069e+07	48.3	0.33	-1.61	0.0183138	1.74	0.0713548	1.23783	neg
Fructose 1,6-bisphosphate	M339T783	339.166	783.1	24.0336	C6H14O12P2	C00354	3.98799e+06	3.84547e+06	18.2	1.25937e+07	6.65828e+06	103.39	0.32	-1.66	0.204214	0.69	0.322409	0.751169	neg
Cellobiose	M341T92_2	341.109	91.6	0.0703588	C12H22O11	C00185	2.80704e+07	2.83755e+07	26.95	7.02471e+07	6.39531e+07	36.48	0.4	-1.32	0.000709107	3.15	0.0181453	1.56919	neg
Estrone sulfate	M349T586	349.111	585.8	0.286442	C18H22O5S	C02538	19300.9	22512.7	66.43	5.71172e+06	476991	223.08	0	-8.21	0.14367	0.84	0.255697	0.849708	neg
Cortisone	M359T602	359.188	602.5	2.99565	C21H28O5	C00762	126458	101758	107	846201	813174	60.22	0.15	-2.74	0.0154897	1.81	0.0651248	1.28168	neg
Cortisol	M361T656	361.164	656.5	3.68565	C21H30O5	C00735	252230	297151	86.78	780878	795452	32.36	0.32	-1.63	0.0730441	1.14	0.163028	1.08496	neg
Thyrotropin releasing hormone	M362T446	362.164	445.8	16.5671	C16H22N6O4	C03958	505584	381158	95.68	1.31409e+06	1.3518e+06	51.84	0.38	-1.38	0.0442141	1.35	0.118974	1.08586	neg
Dehydroepiandrosterone sulfate	M367T638	367.159	637.8	1.08945	C19H28O5S	C04555	876656	97918.1	178.34	3.01965e+06	1.16544e+06	154.77	0.29	-1.78	0.194083	0.71	0.312228	0.756509	neg
Quassin	M369T626	369.173	626	8.09918	C22H28O6	C08778	1.07071e+08	5.53482e+07	115.41	1.48006e+08	8.97232e+07	91.95	0.72	-0.47	0.304288	0.52	0.422546	0.619026	neg
Deoxycorticosterone acetate	M371T771	371.065	771.3	2.57888	C23H32O4	C14554	513050	535732	28.26	3.25193e+06	1.98127e+06	106.41	0.16	-2.66	0.0777747	1.11	0.169952	1.03094	neg
S-Lactoylglutathione	M378T599	378.101	598.8	9.62802	C13H21N3O8S	C03451	4.93042e+06	4.5819e+06	95.26	2.32337e+06	1.12984e+06	150.79	2.12	1.09	0.785346	0.1	0.842602	0.185019	neg
1-O-Sinapoyl-beta-D-glucose	M385T152	385.125	151.9	27.9813	C17H22O10	C01175	7.65957e+06	1.81492e+06	148.25	3.05673e+06	2.71116e+06	45.55	2.51	1.33	0.399511	0.4	0.512197	0.510965	neg
Mitragynine	M397T611	397.204	611	23.1152	C23H30N2O4	C09226	1.89786e+07	2.67073e+06	187.36	1.76447e+07	1.83982e+07	83.79	1.08	0.11	0.475712	0.32	0.582518	0.423998	neg
S-Adenosyl-4-methylthio-2-oxobutanoate	M397T758	397.108	758.3	4.976	C15H20N5O6S	C04425	175141	177180	14.1	270903	172486	97.65	0.65	-0.63	0.495344	0.31	0.599024	0.423403	neg
S-Adenosylmethionine	M397T779	397.225	778.7	4.8452	C15H22N6O5S	C00019	7.41689e+06	6.36593e+06	56.79	8.92102e+06	7.99856e+06	41.58	0.83	-0.27	0.432085	0.36	0.541682	0.463014	neg
25-Hydroxycholesterol	M401T505_1	401.088	504.9	0.901237	C27H46O2	C15519	5.85356e+06	7.78724e+06	77.86	1.09153e+07	1.18236e+07	37.5	0.54	-0.9	0.156473	0.81	0.270743	0.863096	neg
Allocholic acid	M407T505	407.28	505.4	0.186313	C24H40O5	C00695	974306	82801.6	155.07	9.69405e+06	2.32389e+06	195.46	0.1	-3.31	0.128547	0.89	0.236498	0.873767	neg
Neolinustatin	M423T420	423.166	419.9	19.3777	C17H29NO11	C08336	649229	408546	80.63	1.52963e+07	4.55766e+06	161.6	0.04	-4.56	0.00218456	2.66	0.0266712	1.48197	neg
Lanosterin	M425T814	425.256	814.3	4.07888	C30H50O	C01724	294858	247811	79.42	726975	676903	42.32	0.41	-1.3	0.0187872	1.73	0.0723985	1.22996	neg
Folic acid	M441T783_1	441.251	783.4	2.91341	C19H19N7O6	C00504	1.84674e+06	1.79692e+06	46.92	3.08435e+06	2.65631e+06	56.63	0.6	-0.74	0.116936	0.93	0.222698	0.879309	neg
Estrone glucuronide	M445T531	445.196	531.5	21.5096	C24H30O8	C11133	3.50445e+07	7.26518e+06	194.73	3.47273e+06	1.71521e+06	133.96	10.09	3.34	0.64405	0.19	0.726593	0.267454	neg
Glycochenodeoxycholic acid	M448T562	448.304	561.6	5.85317	C26H43NO5	C05466	358564	309039	73.43	8.60946e+06	6.86817e+06	77.39	0.04	-4.59	0.0032779	2.48	0.0312704	1.43611	neg
Methotrexate	M453T530	453.155	530.4	19.693	C20H22N8O5	C01937	5.34564e+06	3.62891e+06	109.82	5.13567e+06	3.74036e+06	102.52	1.04	0.06	0.679732	0.17	0.75591	0.231001	neg
Glycocholic acid	M464T567	464.301	566.7	0.44596	C26H43NO6	C01921	1.92904e+07	5.79933e+06	137.2	6.82417e+07	6.57835e+07	57.93	0.28	-1.82	0.0500838	1.3	0.12801	1.1701	neg
Maltotriose	M503T454	503.154	453.7	15.7487	C18H32O16	C01835	345235	110041	147.52	1.38105e+07	1.10091e+06	227.3	0.02	-5.32	0.0371732	1.43	0.106259	1.12964	neg
Guanosine-5'-triphosphate	M523T837	523.334	836.6	4.93579	C10H16N5O14P3	C00044	1.79016e+06	1.69011e+06	25.06	3.77501e+06	3.78702e+06	27.83	0.47	-1.08	0.00109966	2.96	0.0205792	1.52174	neg
Malonate	M85T615	84.9894	614.8	1.73821	C3H4O4	C00383	2.10213e+06	1.647e+06	80.45	1.06264e+06	935727	60.83	1.98	0.98	0.297701	0.53	0.416831	0.616925	neg
Pyruvic acid	M87T95	87.044	95.3	1.76772	C3H4O3	C00022	6.75892e+06	4.36212e+06	128.85	5.40374e+07	3.67228e+07	109.91	0.13	-3	0.0340432	1.47	0.100975	1.1494	neg
Sarcosine	M89T74	88.9867	74.2	1.73681	C3H7NO2	C00213	2.04235e+07	1.79702e+07	70.83	4.62911e+07	4.57337e+07	55.4	0.44	-1.18	0.0916248	1.04	0.189473	0.936063	neg
L-Lactic acid	M90T153	90.0265	152.6	0.0345764	C3H6O3	C00186	4.02437e+07	3.92924e+07	72.03	2.85764e+07	9.79046e+06	111.62	1.41	0.49	0.333208	0.48	0.450891	0.60433	neg
Dimethyl sulfone	M93T80	92.9268	80.4	0.367025	C2H6O2S	C11142	7.82168e+08	7.50157e+08	49.11	6.20211e+08	5.91475e+08	72.53	1.26	0.33	0.436318	0.36	0.545317	0.485912	neg
